# Supplementary material for: Acupuncture Extended the Thrombolysis Window by Suppressing Blood–Brain Barrier Disruption and Regulating Autophagy–Apoptosis Balance after Ischemic Stroke
Source: MDPI journal article supplement (doi:10.3390/brainsci14040399), 2024-04-19
Supplement: s1 [file s1]

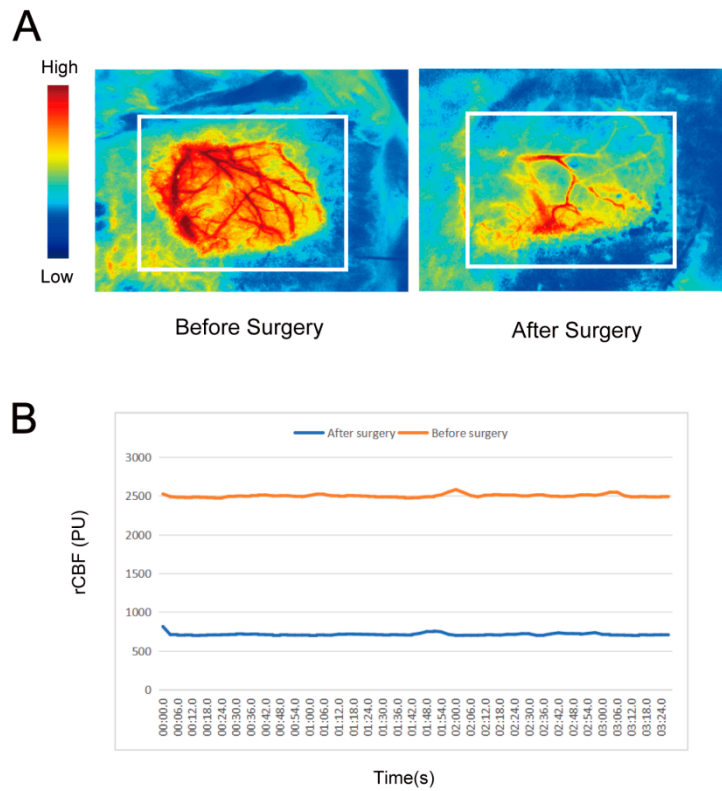

**Figure S1. Cerebral blood flow was monitored by Laser speckle imaging during the surgery of embolic stroke model.** A. Representative images of rCBF. White box is the place where we used to do the quantification. B. Compared to the rCBF before surgery, the reduction of 70% or more in rCBF was considered as successful induction of ischemia.

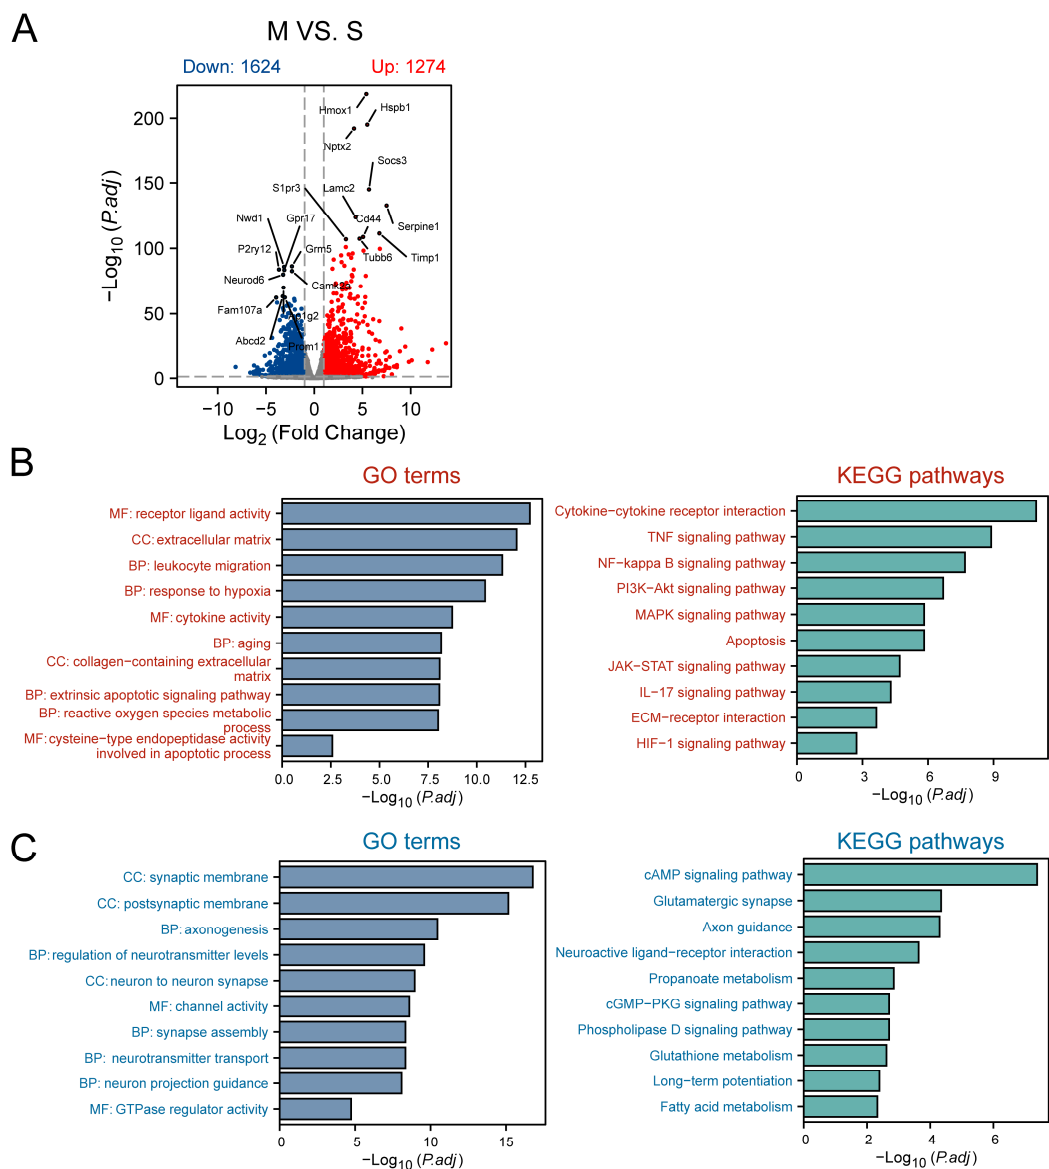

**Figure S2. Differential expression analysis and enrichment analysis result between Model and Sham groups.** (A) Volcano plot of differentially expressed genes. (B-C). Over-representation enrichment analysis of GO terms and KEGG pathways for up- (B) or down-regulated (C) genes

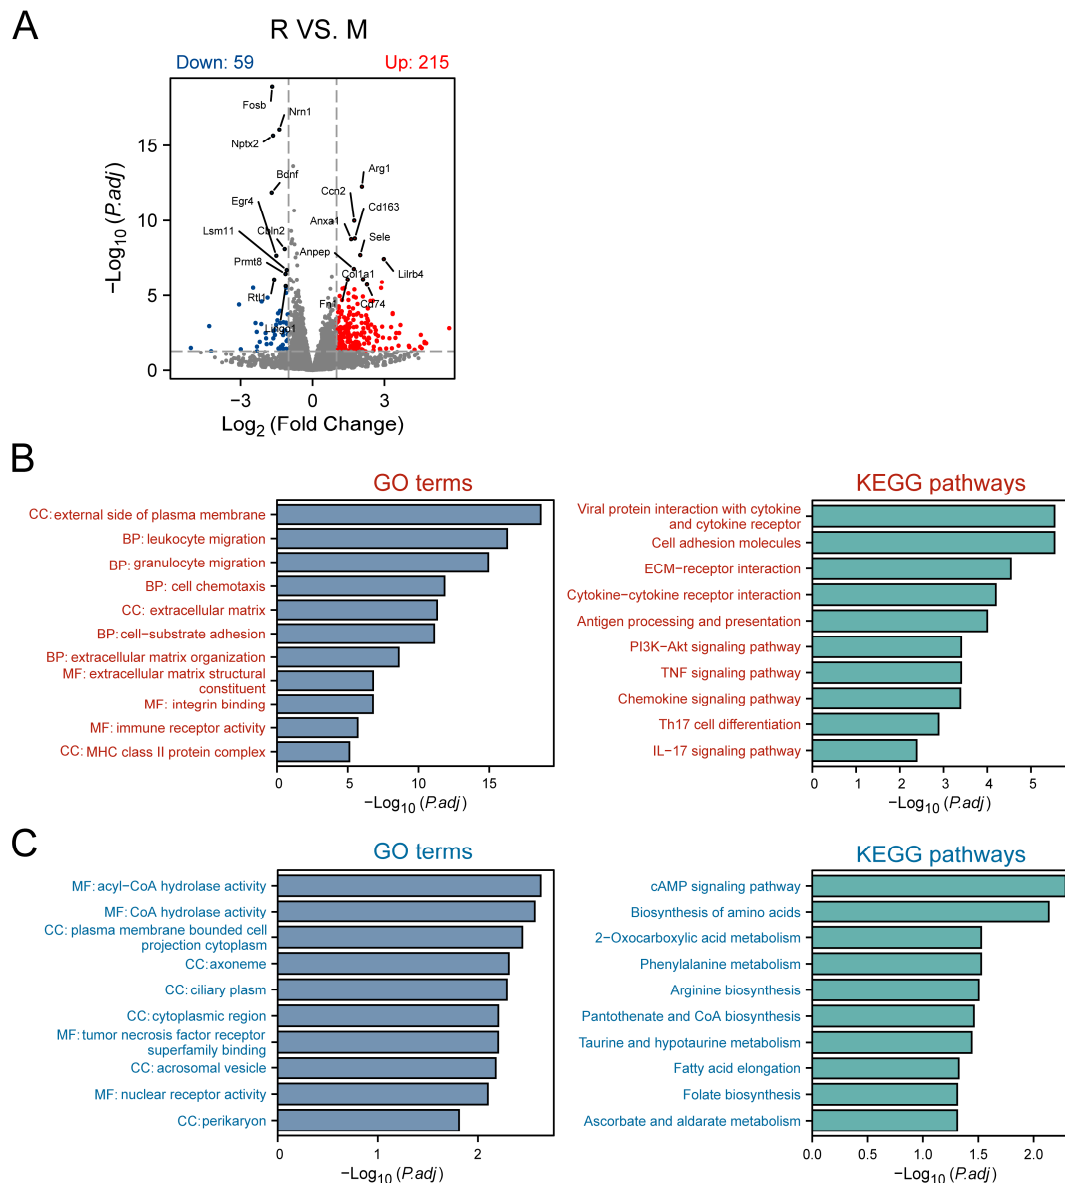

**Figure S3. Differential expression analysis and enrichment analysis result between rt-PA thrombolysis and Model groups.** (A) Volcano plot of differentially expressed genes. (B-C). Over-representation enrichment analysis of GO terms and KEGG pathways for up- (B) or down-regulated (C) genes

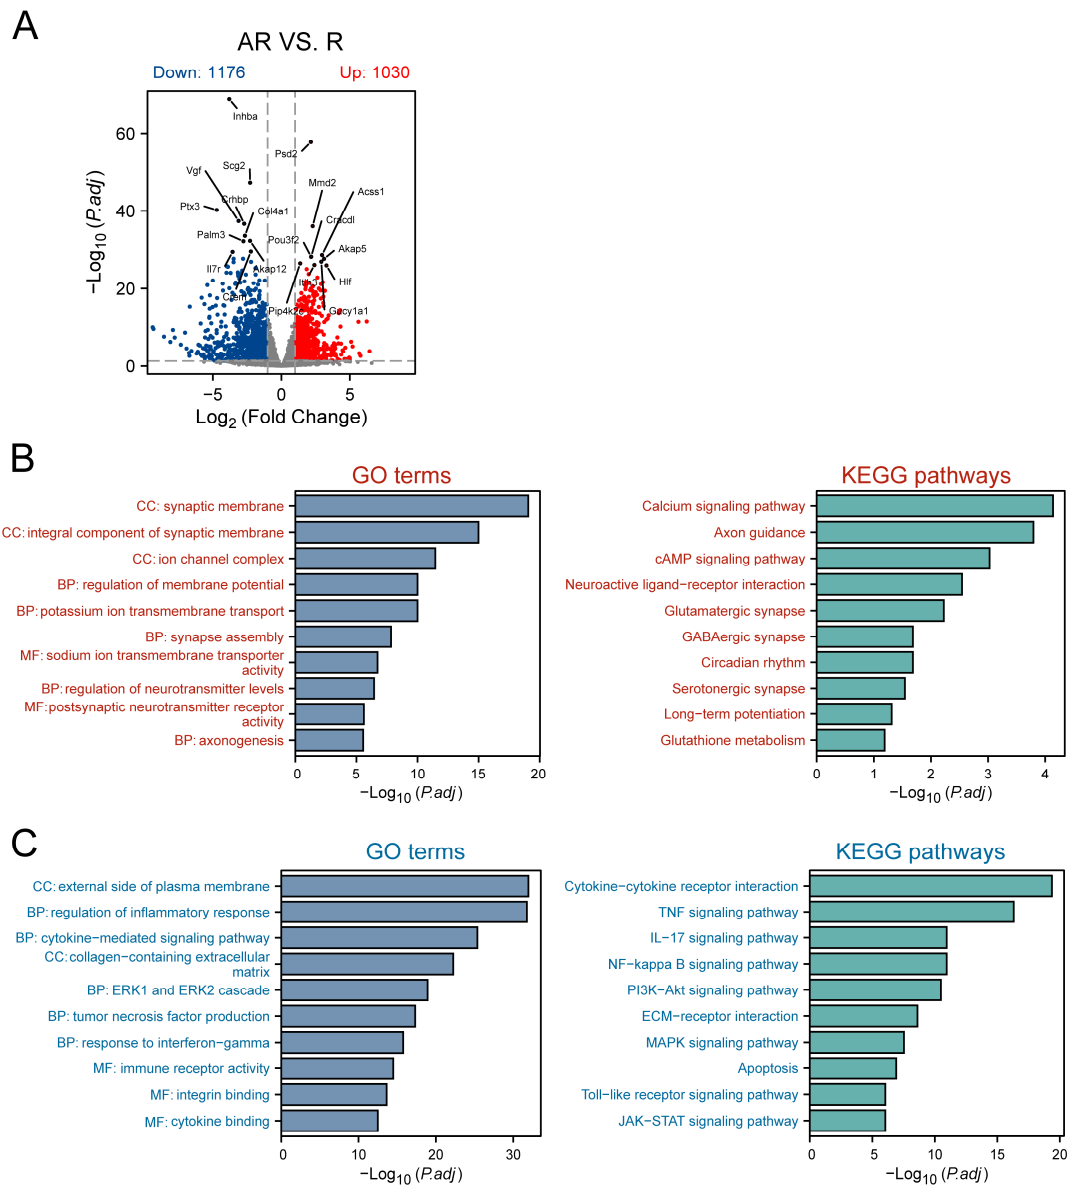

**Figure S4. Differential expression analysis and enrichment analysis result between simultaneous administration of XNKQ acupuncture group and rt-PA thrombolysis. (A)** Volcano plot of differentially expressed genes. (B-C). Over-representation enrichment analysis of GO terms and KEGG pathways for up- (B) or down-regulated (C) genes

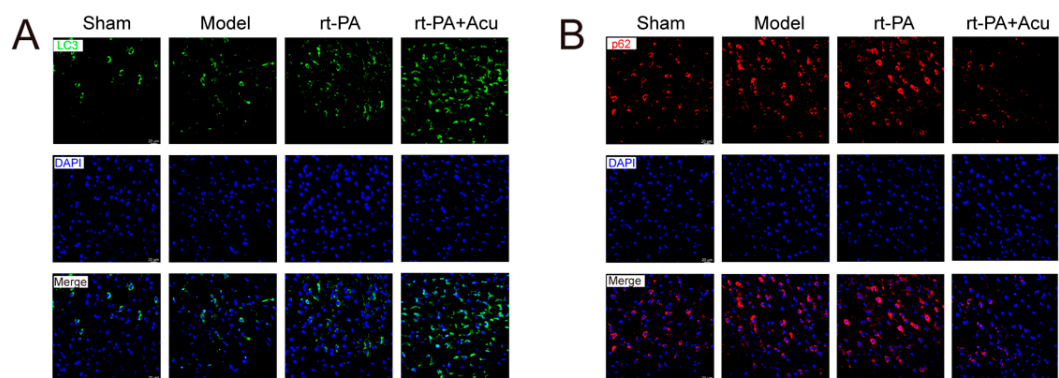

**Figure S5. The effect of acupuncture on the expression of tight junction protein A.** Representative images of LC3 immunofluorescence staining. **B.** Representative images of p62 immunofluorescence staining.
