# Supplementary material for: Acupuncture Extended the Thrombolysis Window by Suppressing Blood–Brain Barrier Disruption and Regulating Autophagy–Apoptosis Balance after Ischemic Stroke
Source: Brain Sci. 2024 Apr 19;14(4):399. doi: 10.3390/brainsci14040399 (PMC11048240; doi:10.3390/brainsci14040399)
Supplement: Supplementary file 1 [file brainsci-14-00399-s001.zip › Table S1.xlsx]

## Sheet: M vs S
id	baseMean	log2FC	lfcSE	stat	PValue	FDR
Hmox1	1940.47	5.4009	0.169282	31.9048	2.29e-223	3.27e-219
Hspb1	1844.53	5.49873	0.182346	30.1556	9.07e-200	6.49e-196
Nptx2	8324.41	4.12644	0.13795	29.9125	1.35e-196	6.46e-193
Socs3	962.366	5.67724	0.218099	26.0305	2.23e-149	7.99e-146
Serpine1	1332.08	7.50116	0.301191	24.905	6.57e-137	1.88e-133
Lamc2	1007.24	4.2915	0.178489	24.0435	9.77e-128	2.33e-124
Timp1	1411.19	6.7538	0.295858	22.8279	2.43e-115	4.96e-112
Cd44	1550.25	5.06765	0.224748	22.5482	1.4e-112	2.5e-109
Tubb6	978.345	4.69478	0.209508	22.4086	3.24e-111	5.16e-108
S1pr3	648.795	3.28635	0.146945	22.3646	8.71e-111	1.25e-107
Tmbim1	1639.38	3.27625	0.150713	21.7383	8.91e-105	1.16e-101
Cd14	564.118	6.80459	0.315157	21.5911	2.18e-103	2.6e-100
Thbs1	664.543	5.10767	0.238258	21.4376	5.96e-102	6.56e-99
Gadd45g	727.744	3.98353	0.1878	21.2116	7.47e-100	7.63e-97
Adamts1	1481.1	3.57211	0.169053	21.1302	4.2e-99	4.01e-96
Vgf	8681.29	2.79132	0.13263	21.046	2.49e-98	2.23e-95
Plin2	866.588	3.83674	0.184062	20.8448	1.7e-96	1.43e-93
Nrn1	6411.21	2.01682	0.0974806	20.6894	4.31e-95	3.43e-92
Sbno2	1069.42	2.8374	0.138569	20.4764	3.5e-93	2.63e-90
Csrnp1	732.683	3.12713	0.155123	20.159	2.24e-90	1.61e-87
Pde4b	2210.48	1.88846	0.0949338	19.8923	4.74e-88	2.95e-85
Mmp9	578.139	4.09594	0.206628	19.8227	1.9e-87	1.1e-84
Icam1	398.745	3.90136	0.201774	19.3353	2.71e-83	1.34e-80
Lgals3	325.626	5.34551	0.277798	19.2424	1.63e-82	7.8e-80
Pdpn	1737.01	3.95672	0.20604	19.2036	3.45e-82	1.59e-79
Antxr2	558.445	3.84506	0.20493	18.7628	1.52e-78	6.81e-76
Prkcd	1038.95	3.33653	0.179251	18.6138	2.48e-77	1.08e-74
Cd63	2396.92	2.23721	0.120639	18.5447	9.01e-77	3.79e-74
Rai14	607.79	2.85114	0.15444	18.4612	4.24e-76	1.73e-73
Tgfb2	2192.39	2.21415	0.120237	18.4148	9.99e-76	3.97e-73
Gfap	22866.6	3.08964	0.169012	18.2806	1.18e-74	4.56e-72
Tll1	628.956	4.81378	0.263722	18.2532	1.95e-74	7.35e-72
Gpnmb	867.826	3.65226	0.201855	18.0935	3.59e-73	1.28e-70
Fgl2	457.684	3.28811	0.182919	17.9758	3.02e-72	1.05e-69
Mustn1	492.255	2.91805	0.162753	17.9293	6.97e-72	2.37e-69
Vim	1415.91	2.00554	0.11436	17.5371	7.47e-69	2.48e-66
Stat3	2929.53	2.30205	0.131342	17.5271	8.9e-69	2.89e-66
Tuba1c	469.107	3.74449	0.214662	17.4437	3.85e-68	1.22e-65
Pxdn	937.752	2.80894	0.162712	17.2632	8.9e-67	2.77e-64
Tgfbi	381.911	4.5189	0.26278	17.1965	2.82e-66	8.41e-64
Sphk1	226.643	5.29162	0.308546	17.1501	6.27e-66	1.83e-63
Anxa2	1213.73	3.64828	0.213361	17.0991	1.51e-65	4.23e-63
Gadd45b	643.762	3.77909	0.222164	17.0103	6.88e-65	1.86e-62
Gipr	294.638	4.18924	0.24705	16.9571	1.71e-64	4.52e-62
Grem2	1418.25	2.47345	0.147225	16.8005	2.42e-63	6.19e-61
Cdo1	1628.04	1.80461	0.108558	16.6234	4.72e-62	1.16e-59
Tnfrsf12a	284.055	5.25625	0.318011	16.5285	2.29e-61	5.46e-59
Hbegf	931.251	4.51853	0.275425	16.4057	1.74e-60	3.96e-58
Igfbp3	375.675	2.96738	0.181557	16.3441	4.79e-60	1.07e-57
Mchr1	398.599	2.85788	0.178006	16.055	5.28e-58	1.13e-55
Sorcs3	2635.3	2.52464	0.157644	16.0149	1.01e-57	2.12e-55
Inhba	845.486	5.00118	0.313499	15.9528	2.72e-57	5.65e-55
Akap12	1957.87	2.57534	0.162075	15.8898	7.46e-57	1.5e-54
P4hb	3371.15	1.88255	0.119734	15.7228	1.05e-55	2.04e-53
Noct	1474.65	2.46132	0.157913	15.5865	8.99e-55	1.69e-52
Odc1	1531.71	1.75865	0.112991	15.5646	1.27e-54	2.35e-52
Osmr	398.678	3.09718	0.199042	15.5605	1.35e-54	2.48e-52
Csf2rb	264.195	4.45011	0.292377	15.2204	2.59e-52	4.57e-50
Hopx	912.841	1.92182	0.126827	15.1531	7.23e-52	1.25e-49
Lgmn	2217.3	1.35367	0.089634	15.1022	1.57e-51	2.67e-49
Ipo5	5627.47	1.81082	0.120384	15.0421	3.89e-51	6.48e-49
Abi3bp	452.436	5.24033	0.349254	15.0044	6.88e-51	1.13e-48
Slc6a17	15727.3	1.53216	0.102434	14.9575	1.39e-50	2.24e-48
Gpat3	527.401	3.0032	0.204251	14.7035	6.13e-49	9.53e-47
FAM187A	221.828	6.11274	0.417177	14.6526	1.3e-48	1.99e-46
Tagln2	713.315	1.96475	0.134212	14.6391	1.58e-48	2.41e-46
Adamts9	326.524	3.83262	0.262726	14.5879	3.36e-48	5.05e-46
Lsp1	213.834	3.53668	0.243381	14.5314	7.66e-48	1.13e-45
Ldha	7131.03	1.5128	0.104271	14.5084	1.07e-47	1.57e-45
Npy	1195.89	2.6926	0.185903	14.4839	1.53e-47	2.21e-45
Ptx3	253.881	6.7519	0.467896	14.4304	3.33e-47	4.77e-45
Cbln1	1283.36	4.27537	0.29673	14.4083	4.59e-47	6.44e-45
Wnt1	148.547	5.06108	0.352163	14.3714	7.82e-47	1.09e-44
Ifrd1	1526.26	1.61199	0.112435	14.3371	1.28e-46	1.77e-44
Sox7	277.898	4.63246	0.327732	14.1349	2.31e-45	3.04e-43
Gadd45a	588.813	3.00371	0.21271	14.1212	2.81e-45	3.66e-43
Kdr	819.899	2.8367	0.202582	14.0027	1.5e-44	1.92e-42
Tpm1	4297.52	1.42954	0.102147	13.9949	1.67e-44	2.12e-42
Eif6	825.612	1.58573	0.113442	13.9783	2.12e-44	2.66e-42
Calca	218.171	5.52672	0.396256	13.9473	3.27e-44	4e-42
Txnrd1	2026.35	1.5563	0.113742	13.6827	1.29e-42	1.51e-40
Tgfb1	328.318	2.37732	0.174614	13.6147	3.27e-42	3.63e-40
Rrad	469.341	4.45751	0.327465	13.6122	3.39e-42	3.73e-40
H19	435.775	9.03161	0.669709	13.4859	1.89e-41	2.02e-39
Aloxe3	257.681	3.29349	0.244935	13.4464	3.23e-41	3.43e-39
Lcp1	697.9	2.08368	0.155243	13.422	4.49e-41	4.66e-39
Scg2	8448.08	2.56808	0.192992	13.3067	2.12e-40	2.09e-38
Rnh1	918.483	2.04185	0.154911	13.1808	1.13e-39	1.09e-37
Jun	3243.99	2.08583	0.1593	13.0937	3.58e-39	3.44e-37
Cxcl16	276.063	3.77745	0.290146	13.0191	9.52e-39	9.03e-37
Cyp27b1	251.841	5.69172	0.437351	13.0141	1.02e-38	9.58e-37
Slc39a14	762.424	1.60212	0.123477	12.975	1.7e-38	1.59e-36
Eif1a	1314.1	2.0814	0.161304	12.9036	4.3e-38	3.97e-36
Itpkc	567.88	1.95766	0.151833	12.8935	4.89e-38	4.49e-36
S100a10	1115.2	3.04489	0.236538	12.8727	6.41e-38	5.84e-36
Sypl2	186.569	3.22319	0.250752	12.8541	8.16e-38	7.39e-36
Plau	173.126	5.99605	0.46943	12.773	2.32e-37	2.05e-35
Myc	261.594	3.81745	0.299347	12.7526	3.02e-37	2.65e-35
Coq8b	996.678	1.6693	0.13091	12.7516	3.06e-37	2.67e-35
Gspt1	2488.55	1.40501	0.110589	12.7047	5.57e-37	4.77e-35
Ltbp1	392.205	3.3062	0.260663	12.6838	7.27e-37	6.12e-35
Arhgap31	948.898	2.03237	0.160284	12.6798	7.66e-37	6.41e-35
Cystm1	528.857	1.58162	0.125019	12.651	1.1e-36	9.14e-35
Sars1	3199.24	1.12253	0.0892509	12.5772	2.82e-36	2.28e-34
Piezo1	423.497	2.12539	0.169615	12.5307	5.07e-36	4.05e-34
Klf10	1043.68	2.07762	0.166078	12.5099	6.59e-36	5.24e-34
Kcnk10	292.106	3.1494	0.25255	12.4704	1.08e-35	8.39e-34
Tnip2	279.06	2.59349	0.208171	12.4585	1.26e-35	9.68e-34
Abca7	876.363	1.40839	0.113614	12.3963	2.74e-35	2.07e-33
Atf4	3845.78	1.37715	0.111207	12.3837	3.2e-35	2.4e-33
Ctsk	557.836	3.0277	0.245382	12.3387	5.6e-35	4.18e-33
Trim47	232.705	2.45615	0.199695	12.2995	9.11e-35	6.76e-33
Pfkfb3	1176.73	1.91932	0.156102	12.2953	9.6e-35	7.08e-33
Fkbpl	380.811	1.88565	0.153438	12.2893	1.03e-34	7.59e-33
Pam	6788.09	1.12063	0.091592	12.235	2.02e-34	1.47e-32
Bcl6	1062.96	1.32194	0.108068	12.2324	2.09e-34	1.51e-32
A3galt2	404.023	3.82789	0.313135	12.2244	2.3e-34	1.66e-32
Nes	1049.34	3.64023	0.298701	12.1868	3.65e-34	2.59e-32
Stat5a	219.768	3.30883	0.27335	12.1047	9.97e-34	6.86e-32
Cebpd	198.158	2.72768	0.225546	12.0937	1.14e-33	7.81e-32
Hmcn2	203.593	3.01302	0.250207	12.0421	2.13e-33	1.43e-31
Lims1	1081.55	1.35805	0.112794	12.0401	2.19e-33	1.46e-31
Eps8l2	228.709	2.55655	0.212731	12.0177	2.87e-33	1.89e-31
Sergef	554.754	1.85953	0.154812	12.0116	3.09e-33	2.02e-31
Tmem18	992.146	1.7332	0.144386	12.0039	3.39e-33	2.2e-31
Cgref1	457.52	1.64002	0.136701	11.9972	3.68e-33	2.38e-31
Pvr	231.459	3.34217	0.279618	11.9527	6.29e-33	4.04e-31
Cyp1b1	1484.58	6.3655	0.535937	11.8773	1.55e-32	9.79e-31
Hspa9	5374.78	1.05678	0.0893089	11.8329	2.64e-32	1.65e-30
Myadm	1443.46	1.37196	0.11601	11.8262	2.86e-32	1.78e-30
Adcyap1	1011.19	2.32021	0.19656	11.8041	3.72e-32	2.3e-30
Tpm4	1454.4	1.6093	0.136351	11.8026	3.78e-32	2.33e-30
Aars1	4477.34	1.17405	0.0995759	11.7905	4.37e-32	2.68e-30
Klf6	1478.15	1.43591	0.122086	11.7615	6.16e-32	3.77e-30
Cd83	478.712	1.70882	0.145749	11.7244	9.56e-32	5.77e-30
Dhcr24	3489.85	1.56302	0.133313	11.7245	9.55e-32	5.77e-30
Maff	193.419	3.43131	0.292918	11.7142	1.08e-31	6.45e-30
Shmt2	559.183	1.5706	0.134126	11.7098	1.13e-31	6.77e-30
Lamb3	162.645	3.76513	0.322868	11.6615	2e-31	1.19e-29
Itgax	147.523	6.77717	0.581685	11.6509	2.27e-31	1.34e-29
Medag	592.716	2.0018	0.172068	11.6338	2.77e-31	1.63e-29
Mfsd9	348.578	2.41227	0.207922	11.6018	4.04e-31	2.36e-29
Dusp26	1827.83	1.80977	0.156539	11.5611	6.48e-31	3.76e-29
Plekhh2	689.305	1.94474	0.168785	11.522	1.02e-30	5.83e-29
Ano6	681.37	1.49016	0.129739	11.4859	1.55e-30	8.83e-29
Ngf	133.935	3.11128	0.271891	11.4431	2.54e-30	1.43e-28
Bid	263.149	2.50908	0.219495	11.4312	2.92e-30	1.63e-28
Ptprh	108.885	3.28753	0.28815	11.4091	3.77e-30	2.09e-28
Clic1	985.763	1.55414	0.136347	11.3984	4.26e-30	2.35e-28
Niban2	2072.01	2.18718	0.192205	11.3794	5.3e-30	2.92e-28
Ccl2	1190.09	13.6611	1.20303	11.3555	6.96e-30	3.8e-28
Grb2	5845.91	1.29145	0.11379	11.3494	7.46e-30	4.04e-28
Mars1	1906.86	1.13311	0.099836	11.3497	7.44e-30	4.04e-28
Cfap70	545.832	1.93634	0.171343	11.301	1.3e-29	6.88e-28
Pabpc4	1388.85	1.46559	0.129999	11.2738	1.77e-29	9.33e-28
Azin1	4771.96	0.927769	0.0830085	11.1768	5.3e-29	2.72e-27
Sccpdh	3219.77	2.06843	0.185142	11.1721	5.58e-29	2.85e-27
Yars1	1694.77	1.41611	0.127045	11.1465	7.45e-29	3.78e-27
Hs3st2	1218.32	1.74914	0.156959	11.1439	7.67e-29	3.88e-27
Actb	22288.2	1.03683	0.0931199	11.1343	8.54e-29	4.29e-27
Grip1	922.102	2.20363	0.19817	11.1199	1e-28	4.96e-27
Aldh1l2	95.2752	4.12834	0.37128	11.1192	1.01e-28	4.98e-27
Ttc9	1071.32	1.18089	0.106709	11.0664	1.83e-28	8.86e-27
Efhd2	5943.14	1.54496	0.139647	11.0634	1.89e-28	9.13e-27
Tspan5	3831.99	1.36246	0.123313	11.0488	2.22e-28	1.07e-26
Galnt14	566.176	2.18543	0.197806	11.0483	2.23e-28	1.07e-26
Hif1a	2735.63	1.65593	0.150146	11.0288	2.77e-28	1.32e-26
Tgfb3	288.206	1.89012	0.173226	10.9113	1.02e-27	4.7e-26
Plch1	667.385	1.98477	0.182205	10.8931	1.24e-27	5.72e-26
Pfn1	2195.99	1.16858	0.107371	10.8835	1.38e-27	6.3e-26
Dusp5	247.929	2.75548	0.253209	10.8822	1.4e-27	6.36e-26
Zmiz1	4663.41	1.52141	0.139825	10.8808	1.42e-27	6.45e-26
Ddah1	1559.09	1.45094	0.133507	10.8679	1.64e-27	7.4e-26
Cacng4	2546.03	1.50538	0.138965	10.8328	2.41e-27	1.07e-25
Pou4f3	345.406	9.43533	0.873107	10.8066	3.2e-27	1.41e-25
Crhbp	534.088	2.00598	0.186266	10.7694	4.8e-27	2.11e-25
Rnf19b	1185.15	1.83957	0.170883	10.7651	5.03e-27	2.2e-25
Vstm2b	775.38	1.64342	0.152664	10.765	5.04e-27	2.2e-25
Bdnf	1422.06	2.33765	0.217325	10.7565	5.52e-27	2.39e-25
Ncan	4593.9	2.376	0.221155	10.7436	6.35e-27	2.75e-25
Map7d1	4506.95	1.13622	0.105763	10.7431	6.38e-27	2.75e-25
Trib1	647.89	1.42225	0.132444	10.7385	6.71e-27	2.88e-25
Eipr1	915.732	1.23855	0.115464	10.7268	7.62e-27	3.26e-25
Srm	589.146	1.42777	0.133157	10.7225	7.98e-27	3.4e-25
Snrpa1	463.097	1.94192	0.181261	10.7134	8.81e-27	3.73e-25
Ehd3	2241.08	1.21356	0.113412	10.7004	1.01e-26	4.28e-25
Uba5	1376.28	1.22741	0.114921	10.6804	1.26e-26	5.24e-25
Gal	98.9037	5.00971	0.470889	10.6388	1.97e-26	8.06e-25
Rheb	2161.59	1.14336	0.107666	10.6195	2.42e-26	9.89e-25
Runx1	148.489	3.59326	0.338813	10.6054	2.81e-26	1.14e-24
Cck	5856.44	1.45732	0.137438	10.6034	2.87e-26	1.16e-24
Pkp1	208.56	3.27471	0.309784	10.5709	4.06e-26	1.64e-24
Rara	297.163	1.99847	0.189347	10.5545	4.84e-26	1.93e-24
Tnfrsf1a	367.945	1.76757	0.167543	10.5499	5.08e-26	2.03e-24
Jak2	1758.31	1.88248	0.178795	10.5287	6.37e-26	2.53e-24
Prkab2	450.654	2.15316	0.205981	10.4532	1.42e-25	5.47e-24
Cables2	1364.96	1.77727	0.170067	10.4504	1.46e-25	5.6e-24
Gldn	584.918	5.64531	0.540934	10.4362	1.69e-25	6.47e-24
Flna	1549.4	1.39252	0.133435	10.436	1.7e-25	6.47e-24
Myd88	316.879	2.39721	0.22975	10.434	1.73e-25	6.59e-24
Aldh18a1	793.024	1.2759	0.122401	10.4239	1.93e-25	7.3e-24
Tmem100	1226.32	2.01038	0.193709	10.3784	3.11e-25	1.17e-23
Hephl1	87.1563	4.99077	0.483444	10.3234	5.52e-25	2.04e-23
Mboat7	2000.47	1.02717	0.099508	10.3224	5.58e-25	2.05e-23
Pax1	442.345	12.2335	1.18811	10.2966	7.3e-25	2.66e-23
Sertad1	271.614	1.87129	0.181989	10.2824	8.46e-25	3.07e-23
Rnf149	1015.07	1.23153	0.120016	10.2614	1.05e-24	3.79e-23
Dok5	749.757	1.91035	0.186624	10.2364	1.36e-24	4.85e-23
Thbd	300.699	2.12633	0.207945	10.2254	1.53e-24	5.39e-23
Hnrnpab	2805.1	1.12202	0.109895	10.2099	1.79e-24	6.29e-23
Slc1a5	202.232	3.77253	0.369617	10.2066	1.85e-24	6.5e-23
Igsf9b	1358.31	2.40599	0.235753	10.2056	1.87e-24	6.55e-23
Sigmar1	798.601	1.30946	0.128323	10.2044	1.9e-24	6.62e-23
Kpna4	3290.54	1.64774	0.162002	10.1711	2.67e-24	9.2e-23
Procr	80.8749	4.09643	0.403076	10.1629	2.9e-24	9.94e-23
Rhoc	539.267	1.59462	0.156933	10.1612	2.96e-24	1.01e-22
Nek6	695.016	1.37649	0.135679	10.1452	3.48e-24	1.17e-22
Msmo1	3272.46	1.25977	0.124278	10.1367	3.8e-24	1.28e-22
Sema3c	1728.32	1.7324	0.170996	10.1312	4.02e-24	1.35e-22
Pa2g4	1904.1	1.19072	0.118153	10.0778	6.93e-24	2.31e-22
Emp1	404.372	2.46616	0.244863	10.0716	7.38e-24	2.45e-22
Adam12	487.155	2.9889	0.297688	10.0404	1.01e-23	3.34e-22
Aen	286.998	1.83319	0.183169	10.0082	1.4e-23	4.61e-22
Alkal2	92.687	3.25822	0.325566	10.0079	1.41e-23	4.61e-22
Ccl7	387.51	8.87831	0.88736	10.0053	1.44e-23	4.72e-22
Npm1	3290.43	1.30739	0.130673	10.0051	1.45e-23	4.72e-22
Eif3g	1335.46	1.06113	0.10607	10.0041	1.46e-23	4.76e-22
Il1rn	111.967	4.50757	0.450593	10.0036	1.47e-23	4.77e-22
Itga5	191.292	2.99412	0.29956	9.99508	1.6e-23	5.19e-22
Sdc1	1375.94	7.51106	0.752746	9.97822	1.9e-23	6.12e-22
Ddx21	1629.26	1.46816	0.147493	9.95407	2.42e-23	7.76e-22
Ptgs1	519.775	2.96962	0.298536	9.94725	2.59e-23	8.28e-22
Bcat1	23153.8	0.984292	0.0990355	9.93877	2.82e-23	8.96e-22
Fcgr2a	389.751	2.02612	0.204287	9.91799	3.48e-23	1.1e-21
Plxna4	4025.88	1.43751	0.145045	9.91075	3.74e-23	1.17e-21
Lbh	271.375	2.08248	0.21073	9.88222	4.97e-23	1.54e-21
Pdcd6ip	2465.01	0.837694	0.084811	9.87719	5.23e-23	1.61e-21
Cemip2	994.741	1.75753	0.178234	9.86079	6.16e-23	1.89e-21
Palm3	281.523	2.9386	0.298064	9.85893	6.27e-23	1.93e-21
Plaur	136.796	4.06313	0.412732	9.84449	7.24e-23	2.22e-21
Pi4k2a	1206.22	1.11421	0.113194	9.84336	7.32e-23	2.24e-21
Crem	512.401	1.73234	0.176306	9.82574	8.72e-23	2.66e-21
Nampt	1788.37	1.14063	0.116294	9.80814	1.04e-22	3.15e-21
Fcgr2b	164.651	3.55384	0.36284	9.7945	1.19e-22	3.59e-21
Slc1a1	1234.74	1.01798	0.104031	9.78539	1.3e-22	3.92e-21
Sprr1a	1413.54	7.36495	0.753331	9.77651	1.42e-22	4.27e-21
Gclc	1354.66	1.18674	0.121829	9.74102	2.02e-22	6e-21
Il1r1	353.099	1.46267	0.150305	9.73132	2.22e-22	6.57e-21
Slc39a1	979.206	1.24115	0.127895	9.70447	2.89e-22	8.5e-21
Rars1	831.3	1.36711	0.141662	9.6505	4.89e-22	1.41e-20
Ptgs2	5887.23	4.0158	0.416497	9.64185	5.32e-22	1.53e-20
Lrrc59	1850.08	0.964284	0.100052	9.63784	5.53e-22	1.59e-20
Pabpc1	3138.22	1.09369	0.113654	9.62293	6.4e-22	1.82e-20
B4galt5	1836.05	1.20892	0.125764	9.61263	7.07e-22	2.01e-20
Acan	344.334	2.76474	0.288257	9.59122	8.71e-22	2.46e-20
Ran	3225.53	0.98663	0.103046	9.57464	1.02e-21	2.86e-20
Jak1	4956.78	1.13904	0.119199	9.55575	1.23e-21	3.41e-20
Dynlt5	268.536	2.74483	0.287408	9.55027	1.29e-21	3.59e-20
Pelo	318.158	1.57759	0.165778	9.51628	1.79e-21	4.93e-20
Mthfd2	149.118	2.11788	0.222766	9.50718	1.96e-21	5.37e-20
Vwa5a	837.314	2.91429	0.306591	9.50545	1.99e-21	5.45e-20
Mylk	723.375	1.2385	0.130488	9.49131	2.28e-21	6.23e-20
Mcm4	451.59	1.56005	0.164975	9.45626	3.19e-21	8.68e-20
Rps27l	212.244	1.66487	0.176205	9.44848	3.44e-21	9.34e-20
Ercc1	462.911	1.30238	0.13818	9.42528	4.29e-21	1.16e-19
Kpnb1	3931.79	1.05334	0.111882	9.41467	4.75e-21	1.28e-19
Dnajb9	1005.82	1.023	0.108715	9.40997	4.96e-21	1.33e-19
Eif2s2	2187.53	0.976056	0.103732	9.40941	4.99e-21	1.33e-19
Ctsc	348.839	2.40894	0.256104	9.4061	5.15e-21	1.37e-19
Flnc	1490.42	4.40582	0.469507	9.38392	6.36e-21	1.68e-19
Lmna	966.959	1.49026	0.158886	9.3794	6.63e-21	1.76e-19
Ret	263.131	2.36792	0.252486	9.37842	6.7e-21	1.77e-19
Gpatch2l	707.844	1.48679	0.158966	9.35291	8.53e-21	2.23e-19
Pafah1b3	125.068	2.45306	0.263102	9.32361	1.12e-20	2.92e-19
Calr	9444.53	0.826549	0.088707	9.31775	1.19e-20	3.07e-19
Ube2q2	1497.07	1.18105	0.126855	9.31025	1.28e-20	3.29e-19
Cdr2	376.407	1.62346	0.174518	9.3025	1.37e-20	3.52e-19
Ncf4	75.0012	3.25601	0.350166	9.29848	1.42e-20	3.65e-19
Uxs1	1207.7	1.10093	0.118813	9.26613	1.93e-20	4.92e-19
Trh	531.647	6.33439	0.684712	9.25118	2.22e-20	5.62e-19
Wdr1	3664.33	1.1377	0.123231	9.23225	2.65e-20	6.68e-19
Pfkp	8486.32	0.902372	0.0977937	9.22731	2.78e-20	6.98e-19
Mcfd2	891.849	1.04623	0.113534	9.21519	3.11e-20	7.77e-19
Cdkn3	66.2963	5.61309	0.609409	9.21071	3.24e-20	8.09e-19
Eif4a1	3777.18	1.10802	0.120346	9.20693	3.36e-20	8.35e-19
Nop58	1068.52	1.3023	0.141476	9.20508	3.41e-20	8.47e-19
Tnfaip3	420.756	1.92753	0.209413	9.20443	3.43e-20	8.51e-19
Panx1	617.718	1.66426	0.181319	9.17863	4.37e-20	1.08e-18
Impdh2	483.516	1.35044	0.147575	9.15082	5.65e-20	1.39e-18
Ptpn2	406.738	1.61156	0.176537	9.12874	6.93e-20	1.7e-18
Krt17	97.3007	4.98273	0.5462	9.12254	7.34e-20	1.79e-18
Cd93	559.658	2.21815	0.243182	9.12136	7.42e-20	1.81e-18
Lpcat1	965.377	1.26183	0.138387	9.11811	7.64e-20	1.85e-18
Ifnlr1	149.36	2.08367	0.228557	9.11663	7.75e-20	1.88e-18
Mak16	519.568	1.19472	0.13139	9.09291	9.64e-20	2.31e-18
Actn1	3823.1	1.16162	0.127836	9.08674	1.02e-19	2.44e-18
Pkm	19110	0.862295	0.0949286	9.08361	1.05e-19	2.5e-18
Stac2	4278.85	1.871	0.206044	9.08059	1.08e-19	2.57e-18
Hgs	1593.92	0.871054	0.0960416	9.06955	1.2e-19	2.83e-18
Wdr12	721.247	1.16837	0.128868	9.06642	1.23e-19	2.91e-18
Ppil1	335.215	1.46053	0.16116	9.06262	1.27e-19	3e-18
Nars1	3838.58	1.07787	0.119577	9.01407	1.99e-19	4.63e-18
Haus8	139.216	2.91149	0.324317	8.9773	2.77e-19	6.43e-18
Ranbp1	1093.14	0.899894	0.100269	8.97482	2.84e-19	6.56e-18
Ecel1	140.523	2.17524	0.243084	8.9485	3.6e-19	8.23e-18
Cxcl1	113.82	7.83315	0.876031	8.94163	3.83e-19	8.72e-18
Ctsz	354.623	1.68462	0.188401	8.94167	3.83e-19	8.72e-18
Shc4	347.863	2.01471	0.22557	8.93167	4.2e-19	9.53e-18
Stc2	142.73	3.75833	0.420978	8.92762	4.35e-19	9.86e-18
Hsph1	7908.28	1.04131	0.116673	8.92506	4.45e-19	1.01e-17
Xpo1	2605.28	0.851713	0.0955158	8.91698	4.79e-19	1.08e-17
Glipr2	66.8524	3.47665	0.389934	8.91601	4.83e-19	1.09e-17
Twf1	1406.29	1.05261	0.118094	8.91334	4.95e-19	1.11e-17
Rgs1	94.1292	3.82278	0.429357	8.90349	5.41e-19	1.21e-17
Pdlim1	169.322	3.01088	0.338988	8.88195	6.57e-19	1.46e-17
Erich5	207.855	2.51896	0.284065	8.86756	7.48e-19	1.66e-17
Plppr4	6640.45	1.54242	0.174626	8.83274	1.02e-18	2.25e-17
Ifitm3	310.598	2.45514	0.278393	8.81898	1.16e-18	2.53e-17
Fosl2	623.58	1.23338	0.140184	8.79824	1.39e-18	3.04e-17
Ncl	7115.66	0.911051	0.103586	8.79513	1.43e-18	3.12e-17
Stam	1813.53	0.898923	0.10227	8.78968	1.5e-18	3.27e-17
Fam83g	113.014	7.81799	0.891481	8.76967	1.79e-18	3.89e-17
Stk40	959.068	0.982352	0.112118	8.76179	1.92e-18	4.17e-17
Kl	69.7763	4.32417	0.494397	8.74634	2.2e-18	4.74e-17
Il6st	3034.13	0.788884	0.0902744	8.73873	2.36e-18	5.07e-17
Atf6	1133.93	0.963001	0.110227	8.73655	2.4e-18	5.16e-17
Mdm2	786.334	1.09552	0.125441	8.73334	2.47e-18	5.3e-17
Srgap1	570.421	1.62808	0.186732	8.7188	2.81e-18	6.01e-17
Hectd2	1563.48	1.61367	0.185183	8.71394	2.93e-18	6.26e-17
Plk2	4233.61	1.1334	0.130245	8.70202	3.26e-18	6.92e-17
Psmc4	1370.17	0.894916	0.102871	8.69937	3.34e-18	7.08e-17
Baz1a	226.407	1.81579	0.208833	8.69492	3.47e-18	7.35e-17
Clic4	2748.99	1.05222	0.121132	8.68658	3.74e-18	7.9e-17
Scyl3	294.305	1.38849	0.159996	8.67826	4.02e-18	8.48e-17
Nfil3	365.002	2.04157	0.235467	8.6703	4.31e-18	9.08e-17
Aatf	237.505	1.59413	0.183913	8.66782	4.4e-18	9.26e-17
Fbl	522.365	1.51995	0.175678	8.6519	5.07e-18	1.06e-16
Rwdd1	543.304	1.57061	0.181826	8.63799	5.72e-18	1.2e-16
Rbpj	1876.25	1.58039	0.183538	8.6107	7.26e-18	1.51e-16
Hnrnpf	2626.9	0.919004	0.106819	8.60341	7.74e-18	1.61e-16
Il13ra1	334.112	2.98432	0.347673	8.58372	9.19e-18	1.89e-16
Atad3a	550.513	1.19531	0.139394	8.57511	9.9e-18	2.03e-16
Ifitm10	282.1	1.60176	0.187149	8.55875	1.14e-17	2.34e-16
Sfn	57.9562	3.81552	0.445918	8.55654	1.16e-17	2.37e-16
Sec61a1	1038.6	0.93147	0.108927	8.55136	1.22e-17	2.48e-16
Ddx1	2246.91	0.780289	0.0913776	8.53917	1.35e-17	2.74e-16
Carhsp1	803.553	1.06196	0.124424	8.53506	1.4e-17	2.83e-16
Vat1l	1855.14	1.73808	0.203752	8.5304	1.46e-17	2.94e-16
Kdm6b	848.56	1.49297	0.17537	8.51328	1.69e-17	3.4e-16
Lrrfip1	1169.68	1.03914	0.122094	8.51094	1.73e-17	3.45e-16
Mapk1ip1l	1317.87	1.1205	0.13168	8.50924	1.75e-17	3.5e-16
Insig1	2236.34	1.54079	0.181132	8.50644	1.79e-17	3.58e-16
Slitrk5	1644.51	1.34197	0.15778	8.50535	1.81e-17	3.6e-16
Itgam	535.07	2.44614	0.289351	8.45389	2.82e-17	5.53e-16
Specc1l	844.341	1.01717	0.120335	8.45281	2.84e-17	5.58e-16
Homer3	499.739	1.70444	0.201985	8.43841	3.22e-17	6.27e-16
Tafa1	1694.95	1.71351	0.203605	8.41585	3.9e-17	7.56e-16
Tubb3	4949.95	0.741576	0.0881409	8.41353	3.98e-17	7.71e-16
Pgap6	445.427	1.29207	0.153699	8.40649	4.22e-17	8.15e-16
Ftsj3	618.129	1.26567	0.150694	8.39894	4.51e-17	8.66e-16
Fgfr1	1256.21	1.29194	0.153963	8.39127	4.81e-17	9.23e-16
Ezr	2739.31	1.47903	0.176702	8.37022	5.75e-17	1.1e-15
Map2k3	237.867	1.55504	0.186003	8.36031	6.26e-17	1.19e-15
Acsl4	3604.49	1.10287	0.131992	8.35559	6.51e-17	1.24e-15
Fbln2	1356.52	3.72936	0.446501	8.3524	6.69e-17	1.27e-15
Nasp	704.631	1.57928	0.189177	8.34815	6.93e-17	1.31e-15
Wdr43	637.075	1.21841	0.146272	8.32975	8.1e-17	1.53e-15
Nppa	202.754	2.15774	0.259613	8.31138	9.46e-17	1.77e-15
Rarres2	360.346	1.86593	0.224611	8.30742	9.78e-17	1.83e-15
Dpysl3	600.996	1.73013	0.208269	8.30717	9.8e-17	1.83e-15
Afg3l2	1541.37	1.08972	0.131371	8.295	1.09e-16	2.02e-15
Sstr4	245.165	1.86691	0.225079	8.29446	1.09e-16	2.03e-15
Trpc7	119.89	3.2522	0.392169	8.29287	1.11e-16	2.05e-15
Etv3	698.239	1.0583	0.127714	8.28649	1.17e-16	2.17e-15
Zfp367	737.906	1.44825	0.174962	8.27755	1.26e-16	2.32e-15
Fgf9	473.188	1.558	0.188906	8.24752	1.62e-16	2.95e-15
Ppp2r1b	729.493	1.04271	0.126755	8.22616	1.93e-16	3.5e-15
Adarb1	5139.13	0.748079	0.0909546	8.22475	1.96e-16	3.54e-15
Vapa	3399.85	0.711354	0.0866409	8.21037	2.21e-16	3.97e-15
Ebna1bp2	710.27	1.28846	0.157072	8.20302	2.34e-16	4.2e-15
Rgs2	1384.73	1.16352	0.141905	8.19933	2.42e-16	4.32e-15
Sele	64.1835	4.04929	0.493868	8.19913	2.42e-16	4.33e-15
Dusp4	798.148	1.72551	0.210631	8.19209	2.57e-16	4.58e-15
Tfpi2	52.0372	4.12868	0.504347	8.18619	2.7e-16	4.8e-15
Spred3	996.732	1.51621	0.185459	8.17545	2.95e-16	5.23e-15
Tsr1	725.267	1.21598	0.148903	8.16628	3.18e-16	5.63e-15
Hsp90aa1	24914.4	0.690076	0.0845771	8.15913	3.37e-16	5.96e-15
Pithd1	1845.95	0.869801	0.106705	8.15142	3.6e-16	6.33e-15
Ddx39a	283.632	1.42094	0.174331	8.15082	3.61e-16	6.36e-15
Gfpt1	3096.18	1.0855	0.133188	8.15014	3.64e-16	6.38e-15
Eif3b	1728.84	0.865737	0.106258	8.14752	3.71e-16	6.51e-15
Disp3	512.641	1.29852	0.159549	8.13869	4e-16	6.98e-15
Tsku	127.373	3.10962	0.382117	8.13786	4.02e-16	7.02e-15
Slc39a6	857.773	1.60947	0.197807	8.13658	4.07e-16	7.09e-15
Med15	959.75	1.03278	0.127055	8.12863	4.34e-16	7.56e-15
Ptbp1	906.746	1.00605	0.12378	8.12771	4.37e-16	7.61e-15
Ppp4r1	665.042	1.08328	0.133349	8.12367	4.52e-16	7.86e-15
Ddost	1487.96	0.921964	0.113578	8.11743	4.76e-16	8.25e-15
Runx3	87.8648	7.45563	0.918761	8.11487	4.86e-16	8.41e-15
Cnn2	269.227	2.14544	0.264538	8.11014	5.06e-16	8.71e-15
Casp3	847.156	2.33529	0.288089	8.10614	5.23e-16	8.99e-15
Tmed9	1420.25	0.760495	0.0941352	8.07876	6.54e-16	1.12e-14
Cln8	446.326	1.13146	0.140472	8.0547	7.97e-16	1.35e-14
Calu	2014.14	0.946983	0.117594	8.05301	8.08e-16	1.37e-14
Gadl1	69.4652	2.8214	0.350558	8.04832	8.39e-16	1.42e-14
Hsp90b1	8315.35	0.765582	0.0952166	8.04042	8.95e-16	1.51e-14
Plpp1	472.314	1.18215	0.147086	8.03715	9.2e-16	1.55e-14
Il1rap	702.246	1.04114	0.129557	8.03618	9.27e-16	1.56e-14
Pmepa1	567.506	1.4608	0.182099	8.02201	1.04e-15	1.74e-14
Tnfsf18	101.521	10.1102	1.26076	8.01913	1.06e-15	1.78e-14
Dennd2c	177.53	2.41098	0.301342	8.00083	1.24e-15	2.06e-14
Birc2	716.246	1.05722	0.132245	7.99441	1.3e-15	2.17e-14
Polr1f	285.663	1.30993	0.163897	7.9924	1.32e-15	2.2e-14
Slc16a3	79.3888	3.94859	0.494356	7.98733	1.38e-15	2.29e-14
Pim2	648.654	0.916907	0.114935	7.97763	1.49e-15	2.47e-14
Lcn2	112.757	3.45112	0.432741	7.97503	1.52e-15	2.51e-14
Nap1l1	3903.71	0.77226	0.097015	7.96021	1.72e-15	2.83e-14
Rock2	8271.52	0.81696	0.102705	7.95443	1.8e-15	2.96e-14
Inmt	70.4179	6.71055	0.844256	7.94848	1.89e-15	3.1e-14
Lrrfip2	579.135	1.40622	0.177096	7.94044	2.01e-15	3.31e-14
Sesn2	537.648	1.87454	0.236212	7.93582	2.09e-15	3.42e-14
Alyref	473.182	1.20467	0.152165	7.91689	2.44e-15	3.98e-14
Golga3	395.592	1.39544	0.176322	7.91421	2.49e-15	4.06e-14
Gng4	252.008	1.75031	0.221399	7.90568	2.66e-15	4.34e-14
Rassf1	311.503	1.27702	0.16159	7.90284	2.73e-15	4.43e-14
Ahsa2	440.167	1.1424	0.144595	7.9007	2.77e-15	4.51e-14
Tcp1	2200.49	0.942864	0.119443	7.89384	2.93e-15	4.75e-14
Metap2	1914.01	0.94122	0.119248	7.89295	2.95e-15	4.78e-14
Gpr158	6201.41	1.29999	0.165022	7.87767	3.34e-15	5.38e-14
Capn2	2084.17	0.911487	0.115815	7.87018	3.54e-15	5.69e-14
Pcbp3	646.619	1.29074	0.164121	7.86459	3.7e-15	5.93e-14
Stt3a	577.381	0.996792	0.126876	7.8564	3.95e-15	6.31e-14
Hars1	1360.96	0.840436	0.10698	7.85603	3.96e-15	6.33e-14
Btf3	1643.75	0.769638	0.0979887	7.85436	4.02e-15	6.4e-14
Col4a1	2110.61	1.82627	0.232567	7.85263	4.07e-15	6.49e-14
Enpp3	94.2967	4.55444	0.580406	7.847	4.26e-15	6.77e-14
Chd7	641.075	1.06031	0.135215	7.84171	4.44e-15	7.04e-14
Ldlr	1064.86	1.72743	0.220471	7.83519	4.68e-15	7.38e-14
Il1r2	45.5593	5.74964	0.734439	7.82861	4.93e-15	7.75e-14
Zfp36	530.231	2.00642	0.256337	7.82728	4.99e-15	7.82e-14
Il7r	402.651	2.53512	0.32408	7.8225	5.18e-15	8.11e-14
Cryab	1257.74	1.58418	0.202517	7.82242	5.18e-15	8.11e-14
Bach1	252.247	1.35721	0.173609	7.81764	5.38e-15	8.41e-14
Dtx1	1363.58	1.25634	0.160762	7.81492	5.5e-15	8.58e-14
Naa50	1083.44	1.03157	0.132196	7.80331	6.03e-15	9.37e-14
Gmps	718.335	1.03359	0.1325	7.8007	6.16e-15	9.56e-14
Palldl1	548.785	0.974345	0.125065	7.79069	6.66e-15	1.03e-13
Ddit3	337.121	1.62152	0.208653	7.77139	7.76e-15	1.19e-13
Gnpnat1	348.431	1.44913	0.186802	7.75756	8.66e-15	1.33e-13
Tmem117	333.041	1.36093	0.175471	7.75588	8.77e-15	1.34e-13
Serinc2	308.308	2.04062	0.263936	7.73147	1.06e-14	1.61e-13
Lonp1	1810.91	0.819332	0.105992	7.73012	1.07e-14	1.62e-13
Arpc1b	376.514	1.57263	0.203755	7.71822	1.18e-14	1.77e-13
Rnf217	479.061	1.20601	0.156508	7.70572	1.3e-14	1.94e-13
Piezo2	66.2832	2.65073	0.344122	7.70286	1.33e-14	1.98e-13
Klhl21	364.55	1.19114	0.154922	7.68861	1.49e-14	2.21e-13
Spred2	1388.25	0.984878	0.128138	7.68605	1.52e-14	2.25e-13
Sh3pxd2b	256.683	1.7107	0.222621	7.68434	1.54e-14	2.28e-13
Sh2b2	117.533	2.22114	0.289683	7.66748	1.75e-14	2.57e-13
Imp4	651.512	1.09816	0.143228	7.66719	1.76e-14	2.58e-13
Cyp2s1	99.0272	2.3761	0.310027	7.66419	1.8e-14	2.63e-13
Gdi2	4539.29	0.809185	0.105595	7.66312	1.81e-14	2.65e-13
Itga2	82.505	9.81132	1.28104	7.65887	1.88e-14	2.73e-13
Slc27a4	1270.21	0.798628	0.104334	7.65454	1.94e-14	2.82e-13
Rtl1	104.73	3.04989	0.399029	7.64328	2.12e-14	3.06e-13
Rnf227	3912.24	1.04544	0.136791	7.64261	2.13e-14	3.08e-13
Cotl1	744.004	0.880108	0.115533	7.61779	2.58e-14	3.7e-13
Zyx	586.936	1.27109	0.16699	7.61177	2.7e-14	3.87e-13
Mcub	51.3026	3.93098	0.51652	7.61051	2.73e-14	3.91e-13
Myh9	3125.15	0.946862	0.124524	7.60387	2.87e-14	4.1e-13
Eef1e1	720.688	1.03254	0.135803	7.60323	2.89e-14	4.11e-13
Nifk	630.083	1.15455	0.152005	7.59546	3.07e-14	4.36e-13
Il11	320.549	11.7687	1.55019	7.59183	3.15e-14	4.48e-13
Oxnad1	297.939	1.39174	0.183397	7.58865	3.23e-14	4.59e-13
Pcna	628.387	1.00624	0.132627	7.587	3.27e-14	4.64e-13
Grm7	732.684	1.2804	0.169004	7.57616	3.56e-14	5e-13
Nploc4	1702.53	0.835012	0.110445	7.56045	4.02e-14	5.64e-13
Fstl3	53.7038	3.65557	0.484352	7.54734	4.44e-14	6.21e-13
Cflar	499.258	2.12474	0.281927	7.5365	4.83e-14	6.72e-13
Ptp4a2	2711.34	0.73808	0.0979647	7.53414	4.92e-14	6.82e-13
Cttnbp2nl	1173.73	1.17832	0.156448	7.53171	5.01e-14	6.95e-13
Hnrnpc	3101.5	0.698874	0.0928198	7.52937	5.1e-14	7.06e-13
Uck2	490.918	1.57277	0.208978	7.52604	5.23e-14	7.22e-13
Rnf4	2476.87	0.937729	0.124608	7.52546	5.25e-14	7.24e-13
Eif5a	4992.82	0.804462	0.106932	7.52312	5.35e-14	7.37e-13
Eif3d	955.35	1.05235	0.140056	7.51374	5.75e-14	7.89e-13
Hmga1	1158.83	1.31118	0.174508	7.51357	5.75e-14	7.89e-13
Ints6	604.928	1.02478	0.136485	7.50834	5.99e-14	8.21e-13
Slco2a1	165.205	2.63063	0.351047	7.49368	6.7e-14	9.15e-13
Dnajb11	1085.05	0.892229	0.119075	7.49302	6.73e-14	9.18e-13
Cstb	743.943	1.12473	0.150114	7.49248	6.76e-14	9.21e-13
Krt15	49.799	4.87299	0.651668	7.47772	7.56e-14	1.03e-12
Api5	2484	0.957241	0.128233	7.46489	8.34e-14	1.13e-12
Atp11b	1537.7	0.8043	0.107833	7.45878	8.73e-14	1.18e-12
Bod1	544.508	1.03504	0.138798	7.45711	8.84e-14	1.19e-12
Eaf1	539.043	1.28909	0.172966	7.45282	9.14e-14	1.23e-12
Cct3	2226.96	0.889497	0.119584	7.43825	1.02e-13	1.37e-12
Cct4	2422.87	0.880147	0.118397	7.43384	1.05e-13	1.41e-12
Psmd5	574.283	1.12316	0.151475	7.41484	1.22e-13	1.62e-12
Acat2	1136.25	1.44986	0.195689	7.40898	1.27e-13	1.69e-12
Nip7	288.112	1.25683	0.169709	7.40579	1.3e-13	1.72e-12
Lrfn2	347.286	1.35803	0.183733	7.39133	1.45e-13	1.92e-12
Nop56	1230.49	1.00983	0.136644	7.39024	1.47e-13	1.93e-12
Rexo2	1250.42	0.888986	0.120409	7.38307	1.55e-13	2.03e-12
Arf4	1567.73	0.687907	0.0931786	7.38266	1.55e-13	2.03e-12
Ostn	50.4318	3.62424	0.490994	7.38144	1.57e-13	2.05e-12
Tspo	94.2606	2.70279	0.366195	7.38074	1.57e-13	2.06e-12
Gch1	65.6878	2.43454	0.329891	7.37981	1.59e-13	2.07e-12
Wnt2	224.356	1.62595	0.220569	7.3716	1.69e-13	2.19e-12
Clec7a	41.5289	4.74092	0.643294	7.36975	1.71e-13	2.22e-12
Cdyl	494.688	1.37043	0.18614	7.36234	1.81e-13	2.34e-12
Pmaip1	350.727	1.57121	0.213671	7.35343	1.93e-13	2.5e-12
Srsf3	1957.86	0.941088	0.128008	7.35177	1.96e-13	2.53e-12
Ddb1	4158.18	0.681836	0.092911	7.33859	2.16e-13	2.79e-12
Golm2	2715.15	0.831954	0.113397	7.33664	2.19e-13	2.82e-12
Chsy1	644.56	1.37375	0.187432	7.32933	2.31e-13	2.98e-12
Dse	237.5	1.62409	0.221595	7.32907	2.32e-13	2.98e-12
Plagl1	120.116	1.7891	0.244231	7.32543	2.38e-13	3.05e-12
Psmd13	1403.12	0.728357	0.0994733	7.32213	2.44e-13	3.12e-12
Nopchap1	142.251	1.98837	0.271665	7.31919	2.49e-13	3.19e-12
Ppm1h	1085.04	1.47397	0.20142	7.31787	2.52e-13	3.22e-12
Wwtr1	616.881	1.11624	0.152586	7.31546	2.56e-13	3.27e-12
Nop14	504.945	1.03174	0.141088	7.31276	2.62e-13	3.33e-12
Rpl7l1	1370.8	0.900202	0.123159	7.3093	2.69e-13	3.42e-12
Tmod3	759.678	0.93771	0.128296	7.30896	2.69e-13	3.42e-12
Tmx1	2504.97	0.724462	0.0991248	7.30858	2.7e-13	3.43e-12
U2af1	684.948	0.9745	0.133416	7.30421	2.79e-13	3.53e-12
Grem1	291.977	1.41266	0.193555	7.29848	2.91e-13	3.67e-12
Ehd4	442.916	1.24631	0.170773	7.29804	2.92e-13	3.68e-12
Cnn3	2149.69	0.940729	0.129036	7.29042	3.09e-13	3.89e-12
Fpgs	187.812	1.62024	0.222421	7.28457	3.23e-13	4.05e-12
Cnbp	4602.53	0.681916	0.093639	7.28239	3.28e-13	4.11e-12
Glra1	62.0069	5.3424	0.73377	7.28075	3.32e-13	4.16e-12
Gpr68	205.532	1.99268	0.273865	7.27613	3.44e-13	4.3e-12
Dsp	205.674	2.44943	0.336723	7.2743	3.48e-13	4.35e-12
Ssh1	653.449	1.00428	0.138057	7.27437	3.48e-13	4.35e-12
Phlda1	479.535	1.44843	0.199231	7.27011	3.59e-13	4.48e-12
Psmd11	1628.34	0.723078	0.0994683	7.26943	3.61e-13	4.5e-12
Ptrh1	256.759	2.17909	0.299772	7.26915	3.62e-13	4.5e-12
Setd1a	988.6	0.917349	0.126243	7.26654	3.69e-13	4.58e-12
Riok3	1851.09	0.812401	0.111866	7.26227	3.81e-13	4.72e-12
Itpripl2	185.102	1.3421	0.184951	7.2565	3.97e-13	4.92e-12
Man1a1	1236.41	1.33964	0.184819	7.24841	4.22e-13	5.21e-12
Ankrd28	3256.64	0.683605	0.0943192	7.24778	4.24e-13	5.23e-12
Cct5	2739.75	0.747233	0.103179	7.24211	4.42e-13	5.45e-12
Msr1	165.535	6.89649	0.953438	7.23329	4.71e-13	5.8e-12
Ier3	185.081	2.23551	0.309265	7.22846	4.89e-13	5.99e-12
Tnfaip6	183.545	1.94565	0.269172	7.22828	4.89e-13	5.99e-12
Smim14	2940.61	0.704258	0.0975629	7.21851	5.26e-13	6.42e-12
Creb3l1	101.147	2.10783	0.292139	7.21516	5.39e-13	6.57e-12
Prss35	153.763	2.84429	0.394459	7.21061	5.57e-13	6.78e-12
Tgm2	556.312	1.93647	0.268581	7.21	5.6e-13	6.81e-12
Slc5a1	45.4004	6.48664	0.899736	7.20949	5.62e-13	6.82e-12
Rps13	1825.64	0.770552	0.10688	7.2095	5.62e-13	6.82e-12
Pxdc1	171.486	1.93609	0.268787	7.20306	5.89e-13	7.13e-12
Myo18b	39.5411	3.6102	0.501263	7.20221	5.92e-13	7.17e-12
Rad23b	5898.42	0.833489	0.115755	7.20044	6e-13	7.26e-12
Eif1b	1567.81	0.84749	0.117794	7.19465	6.26e-13	7.54e-12
Nav2	1595.76	1.22012	0.16966	7.19154	6.41e-13	7.7e-12
Lsm11	971.653	1.21393	0.168856	7.18915	6.52e-13	7.83e-12
Tpm3	2756.03	0.659128	0.0916962	7.18817	6.57e-13	7.87e-12
Gtpbp4	568.034	1.19418	0.166211	7.18474	6.73e-13	8.06e-12
Sec23b	486.174	1.12513	0.156731	7.17874	7.04e-13	8.38e-12
Ptprj	5405.94	1.19088	0.165908	7.17795	7.08e-13	8.41e-12
Acsl1	1502.44	1.28335	0.179477	7.15049	8.65e-13	1.02e-11
Smad1	524.967	0.930752	0.130233	7.14682	8.88e-13	1.05e-11
Litaf	695.621	1.33698	0.187206	7.14175	9.21e-13	1.09e-11
Fhod3	2404.02	1.03235	0.144764	7.1313	9.94e-13	1.17e-11
Pnoc	163.595	1.87508	0.263267	7.12238	1.06e-12	1.24e-11
Incenp	396.134	1.1625	0.163369	7.11579	1.11e-12	1.3e-11
Ugdh	475.907	0.968199	0.136175	7.10998	1.16e-12	1.36e-11
Eif4e	1986.04	0.930778	0.13097	7.10678	1.19e-12	1.39e-11
Errfi1	1139.99	1.35578	0.190801	7.10569	1.2e-12	1.4e-11
Slc25a32	284.632	1.21975	0.171749	7.10192	1.23e-12	1.43e-11
Eif3j	1674.48	0.81624	0.114972	7.09948	1.25e-12	1.45e-11
Pak1ip1	174.396	1.60675	0.226327	7.09922	1.25e-12	1.46e-11
Nt5e	287.14	1.67079	0.235434	7.09664	1.28e-12	1.48e-11
Syt5	2259.73	0.789185	0.111264	7.0929	1.31e-12	1.52e-11
Slc4a11	345.816	2.1321	0.300873	7.08638	1.38e-12	1.59e-11
Nop16	615.171	0.879026	0.124066	7.08514	1.39e-12	1.6e-11
Atg12	1584.21	0.676212	0.0954709	7.08291	1.41e-12	1.63e-11
G3bp1	2291.49	0.728068	0.103043	7.06569	1.6e-12	1.83e-11
Mad2l1bp	175.639	1.71458	0.242739	7.06347	1.62e-12	1.86e-11
Bmper	402.914	1.1791	0.167132	7.05489	1.73e-12	1.97e-11
Ier5	969.205	1.02242	0.144925	7.05481	1.73e-12	1.97e-11
Plcd1	414.335	1.33366	0.1891	7.05268	1.76e-12	2e-11
Rpe	707.214	0.824038	0.116892	7.04957	1.79e-12	2.04e-11
RGD1565622	124.867	1.85815	0.264023	7.03783	1.95e-12	2.21e-11
Ssx2ip	1814.85	0.751327	0.106755	7.03788	1.95e-12	2.21e-11
Zpr1	790.126	1.19302	0.169528	7.03729	1.96e-12	2.22e-11
Slc35e1	951.311	0.794936	0.113068	7.03062	2.06e-12	2.32e-11
Snx18	905.792	1.00053	0.142409	7.02576	2.13e-12	2.4e-11
Eri1	495.838	1.22727	0.174732	7.02375	2.16e-12	2.43e-11
Fbxo10	1513.27	1.42532	0.202956	7.02278	2.17e-12	2.45e-11
Grb10	1224.78	1.07324	0.152878	7.02024	2.21e-12	2.49e-11
Eif2b1	490.129	1.03222	0.147086	7.01775	2.25e-12	2.53e-11
Gtf2f1	1394.23	0.782654	0.111584	7.01405	2.32e-12	2.59e-11
Parp3	149.132	2.16627	0.309153	7.00711	2.43e-12	2.71e-11
Tars1	1157.66	1.11416	0.159002	7.00722	2.43e-12	2.71e-11
Phb2	1089.1	0.761001	0.108733	6.99882	2.58e-12	2.87e-11
Glipr1	41.6155	3.16309	0.451992	6.9981	2.59e-12	2.88e-11
Midn	768.377	1.13246	0.161922	6.9939	2.67e-12	2.96e-11
Zw10	308.39	1.13904	0.162975	6.98904	2.77e-12	3.06e-11
Trmt6	307.454	1.29683	0.185827	6.97872	2.98e-12	3.28e-11
Fgr	78.1062	2.85603	0.409565	6.97334	3.1e-12	3.41e-11
Tox4	1535.54	0.647132	0.0928069	6.97288	3.11e-12	3.42e-11
Fam184a	451.506	1.13948	0.163524	6.96825	3.21e-12	3.53e-11
Foxj3	1627.41	0.732427	0.105141	6.96613	3.26e-12	3.58e-11
Paics	905.619	0.773636	0.1111	6.96341	3.32e-12	3.64e-11
Bop1	599.71	0.913189	0.131169	6.96192	3.36e-12	3.68e-11
Anp32e	3604.23	0.685873	0.0987241	6.94737	3.72e-12	4.06e-11
Ptger3	152.326	3.17221	0.456834	6.9439	3.81e-12	4.15e-11
Mybpc1	105.594	2.23371	0.322037	6.93618	4.03e-12	4.38e-11
Ptp4a1	2754.25	0.991027	0.142907	6.93477	4.07e-12	4.42e-11
Rap1b	2086.63	0.796264	0.114837	6.93387	4.09e-12	4.45e-11
Prss23	286.913	1.64076	0.236885	6.92639	4.32e-12	4.68e-11
Pappa2	237.873	2.54047	0.367045	6.92141	4.47e-12	4.85e-11
Dab2	539.974	1.16813	0.168824	6.91922	4.54e-12	4.92e-11
Amigo3	1125.83	0.902596	0.130449	6.91915	4.54e-12	4.92e-11
Oxtr	67.8467	3.2136	0.464609	6.91679	4.62e-12	4.99e-11
Ctps1	1308.54	0.80049	0.115807	6.91226	4.77e-12	5.14e-11
Mybbp1a	1235.65	1.00394	0.145285	6.91018	4.84e-12	5.22e-11
Rrbp1	1855.03	0.801725	0.116057	6.90804	4.91e-12	5.29e-11
Gopc	1947.8	0.763251	0.110546	6.90441	5.04e-12	5.42e-11
Mcm5	65.5871	3.45088	0.499893	6.90323	5.08e-12	5.46e-11
Mmp19	57.6408	2.51361	0.364135	6.90296	5.09e-12	5.47e-11
Tmem198	711.808	0.894322	0.129578	6.90181	5.13e-12	5.5e-11
Slc10a4	62.799	2.67624	0.387933	6.89872	5.25e-12	5.61e-11
B4galnt4	1556.13	0.981629	0.142337	6.89652	5.33e-12	5.7e-11
Nabp1	312.961	1.24684	0.180909	6.89209	5.5e-12	5.87e-11
Prep	817.539	0.849039	0.123229	6.88991	5.58e-12	5.96e-11
Igf2bp2	60.173	2.91863	0.423633	6.88953	5.6e-12	5.97e-11
Kcmf1	1052.38	0.710675	0.103269	6.88182	5.91e-12	6.28e-11
Mrto4	503.366	1.06022	0.154252	6.87334	6.27e-12	6.64e-11
Slc16a14	202.795	1.45149	0.211197	6.87267	6.3e-12	6.67e-11
Kansl2	1435.42	0.788269	0.114761	6.86876	6.48e-12	6.85e-11
Polr1g	179.538	1.37684	0.20046	6.86843	6.49e-12	6.86e-11
Uox	43.663	5.00344	0.728524	6.86791	6.51e-12	6.88e-11
Mcrip1	799.956	0.936356	0.136533	6.8581	6.98e-12	7.35e-11
Smn1	304.027	1.12152	0.163798	6.84694	7.54e-12	7.92e-11
Il4r	292.288	2.14048	0.312986	6.8389	7.98e-12	8.34e-11
F7	34.8476	8.56835	1.25314	6.83748	8.06e-12	8.42e-11
Fxyd5	198.771	1.48478	0.217325	6.83205	8.37e-12	8.74e-11
Trmt61a	300.574	1.21067	0.177277	6.82926	8.54e-12	8.88e-11
Tpbg	548.994	1.23697	0.181284	6.8234	8.89e-12	9.23e-11
Pdlim4	545.912	1.65575	0.242743	6.821	9.04e-12	9.37e-11
Tspan12	1210.31	1.04659	0.15351	6.81769	9.25e-12	9.58e-11
Has2	58.9303	3.11492	0.45726	6.81213	9.62e-12	9.95e-11
Ctsb	6348.33	0.78892	0.115885	6.80779	9.91e-12	1.02e-10
Ahr	349.096	1.37882	0.202796	6.79904	1.05e-11	1.09e-10
Ptges3	3447.73	0.695942	0.10237	6.7983	1.06e-11	1.09e-10
Bcl2l13	799.929	0.989948	0.145646	6.79696	1.07e-11	1.1e-10
Zfp655	1033.75	0.848886	0.124891	6.79703	1.07e-11	1.1e-10
Psmc2	1788.76	0.69111	0.101778	6.79037	1.12e-11	1.15e-10
Rangap1	2756.65	0.714374	0.105286	6.78507	1.16e-11	1.19e-10
Ncf2	63.0653	2.8208	0.416033	6.78024	1.2e-11	1.22e-10
Brap	1021.61	0.726423	0.107307	6.76957	1.29e-11	1.31e-10
Cad	789.714	0.804878	0.118917	6.76841	1.3e-11	1.32e-10
Enox1	498.341	1.21697	0.179821	6.76766	1.31e-11	1.33e-10
Helb	269.429	1.08985	0.161041	6.7675	1.31e-11	1.33e-10
Ccdc86	255.675	1.33847	0.197811	6.76638	1.32e-11	1.34e-10
Rbm17	700.08	0.812306	0.120221	6.75677	1.41e-11	1.43e-10
Bgn	421.993	1.47303	0.218116	6.75345	1.44e-11	1.46e-10
Pkd2	1106.36	1.13992	0.169045	6.74331	1.55e-11	1.57e-10
Ccnh	517.754	0.864501	0.128237	6.74141	1.57e-11	1.59e-10
Hspa5	7941.46	0.8039	0.119269	6.74023	1.58e-11	1.6e-10
P4ha3	190.695	1.63289	0.24229	6.7394	1.59e-11	1.61e-10
Nedd9	535.793	1.3671	0.20288	6.73844	1.6e-11	1.61e-10
Pcsk6	382.852	1.19987	0.178207	6.73303	1.66e-11	1.67e-10
Lrrc8d	772.293	0.781282	0.116065	6.73139	1.68e-11	1.69e-10
Hecw2	1188.4	1.24134	0.184423	6.73091	1.69e-11	1.69e-10
Cdv3	1900.58	1.07153	0.159407	6.72197	1.79e-11	1.79e-10
Syncrip	2887.25	0.951376	0.141674	6.71524	1.88e-11	1.88e-10
Bcl3	50.5987	3.00082	0.447546	6.70506	2.01e-11	2.01e-10
Tlr1	42.9064	3.09532	0.462854	6.68748	2.27e-11	2.25e-10
Taf9	1271.59	0.779143	0.116651	6.67929	2.4e-11	2.37e-10
Cdk12	815.341	0.866674	0.129786	6.6777	2.43e-11	2.4e-10
Larp1b	696.542	0.921407	0.13802	6.67592	2.46e-11	2.42e-10
Hk1	7759.03	0.605774	0.0907797	6.67301	2.51e-11	2.47e-10
Misp3	37.6059	3.07374	0.46067	6.67233	2.52e-11	2.48e-10
Moap1	1903.1	0.672917	0.100872	6.67097	2.54e-11	2.5e-10
Stt3b	912.624	0.758094	0.113886	6.65663	2.8e-11	2.74e-10
Larp4b	2110.89	0.686623	0.103174	6.65503	2.83e-11	2.77e-10
Picalm	5079.55	0.685806	0.103075	6.65346	2.86e-11	2.8e-10
Cbr3	133.619	2.15225	0.323655	6.64982	2.93e-11	2.86e-10
Scnn1g	44.0155	3.86601	0.581939	6.64333	3.07e-11	2.99e-10
Arcn1	2723.91	0.681853	0.10269	6.63993	3.14e-11	3.06e-10
Ndel1	1378.85	0.676346	0.101877	6.63886	3.16e-11	3.08e-10
Dhps	638.716	0.924024	0.139191	6.63852	3.17e-11	3.08e-10
Barhl2	32.832	8.48115	1.2778	6.63731	3.19e-11	3.1e-10
Aspg	53.8507	3.35797	0.506193	6.63377	3.27e-11	3.17e-10
Jarid2	978.55	0.90826	0.136968	6.63121	3.33e-11	3.22e-10
Xirp1	274.934	5.77044	0.870761	6.6269	3.43e-11	3.3e-10
Lif	472.276	7.40891	1.11838	6.62466	3.48e-11	3.34e-10
Tinf2	307.84	1.03687	0.156516	6.62469	3.48e-11	3.34e-10
Asns	1225.22	1.30207	0.196564	6.62415	3.49e-11	3.35e-10
Slc6a5	311.564	4.55039	0.687369	6.62001	3.59e-11	3.44e-10
Skil	2924.09	0.740442	0.112033	6.60912	3.87e-11	3.7e-10
Pkn3	3234.42	0.784844	0.118792	6.60686	3.93e-11	3.75e-10
Tgfb1i1	400.132	1.12502	0.17035	6.6042	4e-11	3.81e-10
Elmo1	1703.71	0.996485	0.150918	6.60281	4.03e-11	3.84e-10
Tgif1	134.459	2.06212	0.31238	6.60131	4.08e-11	3.88e-10
Mvp	341.216	1.35125	0.204803	6.59781	4.17e-11	3.97e-10
Sapcd2	55.8553	2.38806	0.361989	6.59706	4.19e-11	3.98e-10
Ccnc	1065.68	0.705427	0.106935	6.5968	4.2e-11	3.99e-10
Mocs3	181.755	1.30743	0.198198	6.59661	4.21e-11	3.99e-10
Oscar	55.6449	3.16472	0.479905	6.59447	4.27e-11	4.04e-10
Furin	792.714	0.790327	0.119857	6.59393	4.28e-11	4.05e-10
Sec24c	1677.54	0.612187	0.0929635	6.58524	4.54e-11	4.29e-10
Cul2	1296.41	0.854985	0.129913	6.58121	4.67e-11	4.4e-10
Rpl7a	4405.61	0.62917	0.0956447	6.5782	4.76e-11	4.49e-10
Ripk3	51.6967	2.42781	0.369088	6.57787	4.77e-11	4.5e-10
Etf1	1139.15	0.895841	0.136237	6.57559	4.85e-11	4.56e-10
Asnsd1	813.148	0.710946	0.108176	6.57214	4.96e-11	4.66e-10
Xylb	272.233	1.08813	0.165614	6.57032	5.02e-11	4.72e-10
Ppargc1a	441.364	1.0614	0.161588	6.56856	5.08e-11	4.76e-10
Adam9	1068.35	0.660457	0.100555	6.56815	5.09e-11	4.77e-10
Ptma	5001.23	1.53395	0.233583	6.56706	5.13e-11	4.8e-10
Fbn1	261.305	1.68211	0.256294	6.56319	5.27e-11	4.92e-10
Pxn	1076.28	0.938232	0.142993	6.56139	5.33e-11	4.98e-10
Thoc7	675.887	0.734118	0.111913	6.55969	5.39e-11	5.03e-10
Hsf2bp	40.2763	4.27528	0.652589	6.55125	5.71e-11	5.31e-10
Wdr91	502.053	1.19645	0.182726	6.54781	5.84e-11	5.43e-10
Ssr1	2251.05	0.80185	0.122534	6.54391	5.99e-11	5.56e-10
Sec24d	244.303	1.29256	0.198033	6.52699	6.71e-11	6.2e-10
Rnf6	1272.01	0.701569	0.107515	6.52529	6.79e-11	6.27e-10
Dnaja1	4565.79	0.593448	0.090961	6.5242	6.84e-11	6.31e-10
Rrp12	581.734	1.32728	0.2037	6.51584	7.23e-11	6.65e-10
Eif3c	3134.2	0.893016	0.137238	6.50706	7.66e-11	7.05e-10
Kctd10	618.945	0.799841	0.122984	6.5036	7.84e-11	7.2e-10
Gemin5	361.726	0.939187	0.14443	6.50272	7.89e-11	7.24e-10
Cxcl3	32.0778	8.44847	1.29993	6.49916	8.08e-11	7.4e-10
Rpl18	1879.57	0.675931	0.104111	6.49238	8.45e-11	7.74e-10
Polr2a	1937.77	0.674772	0.103959	6.49072	8.54e-11	7.81e-10
Bean1	166.39	1.38527	0.213569	6.48628	8.8e-11	8.04e-10
Zdhhc18	654.866	0.960268	0.148105	6.48372	8.95e-11	8.17e-10
Artn	35.1759	3.79549	0.585688	6.48041	9.15e-11	8.34e-10
Cited2	941.135	1.23295	0.190486	6.47265	9.63e-11	8.77e-10
Uba2	1541.38	0.61026	0.0943983	6.46473	1.01e-10	9.23e-10
Tmed2	2297.7	0.650887	0.100728	6.46181	1.03e-10	9.39e-10
Pitpnb	1767.93	0.780002	0.120816	6.45609	1.07e-10	9.74e-10
Myo9b	1635.85	0.772584	0.119687	6.45501	1.08e-10	9.8e-10
Glis2	262.562	1.2884	0.199662	6.45289	1.1e-10	9.93e-10
Zfand2a	779.717	1.21217	0.188112	6.44386	1.16e-10	1.05e-09
Hk3	28.1367	8.26026	1.28218	6.44236	1.18e-10	1.06e-09
Snx2	1152.55	0.97859	0.152129	6.43262	1.25e-10	1.13e-09
Cxcl2	60.2951	8.39211	1.30629	6.4244	1.32e-10	1.19e-09
Hyou1	2469.06	0.75306	0.117248	6.42281	1.34e-10	1.2e-09
Aimp1	660.901	1.12259	0.174847	6.42045	1.36e-10	1.22e-09
Lexm	37.0313	3.91371	0.609963	6.41631	1.4e-10	1.25e-09
H3f3a	3855.91	1.22393	0.190916	6.41084	1.45e-10	1.29e-09
Ybx3	706.679	0.940906	0.14681	6.409	1.46e-10	1.31e-09
Wdr74	289.711	1.1082	0.172935	6.40817	1.47e-10	1.31e-09
Eif2s1	881	1.08626	0.16961	6.40447	1.51e-10	1.34e-09
Col6a3	418.918	3.851	0.601494	6.40239	1.53e-10	1.36e-09
Helt	30.0019	8.35281	1.30479	6.40163	1.54e-10	1.36e-09
Myo1e	621.718	1.05745	0.165206	6.40082	1.55e-10	1.37e-09
Mcm3	76.2206	2.22443	0.347869	6.39444	1.61e-10	1.42e-09
Tbrg4	419.785	0.875465	0.137026	6.38905	1.67e-10	1.47e-09
Nmd3	348.598	1.06125	0.166318	6.38084	1.76e-10	1.55e-09
Rbms1	390.813	1.02517	0.160761	6.37698	1.81e-10	1.58e-09
Psma5	924.75	0.7861	0.123294	6.37579	1.82e-10	1.6e-09
Plce1	207.944	1.19868	0.188044	6.37449	1.84e-10	1.61e-09
Myo3b	26.0317	4.65162	0.729876	6.37317	1.85e-10	1.62e-09
Otulinl	192.519	1.48618	0.233363	6.36851	1.91e-10	1.67e-09
Kif18a	30.8862	4.00922	0.629551	6.36839	1.91e-10	1.67e-09
Zdhhc14	768.974	0.926283	0.145554	6.36385	1.97e-10	1.71e-09
Adcy7	99.7639	1.93538	0.304522	6.35546	2.08e-10	1.81e-09
Abce1	1820.91	0.746753	0.117657	6.34686	2.2e-10	1.91e-09
Mtpap	529.308	0.997086	0.157107	6.34654	2.2e-10	1.91e-09
Fcgr1a	72.3199	2.05135	0.323313	6.34478	2.23e-10	1.93e-09
Mat2a	5474.91	0.815396	0.128531	6.34397	2.24e-10	1.94e-09
Utp18	636.813	1.04037	0.164102	6.33978	2.3e-10	1.99e-09
Aacs	874.426	0.797699	0.125913	6.33532	2.37e-10	2.04e-09
Ddx10	577.74	0.867424	0.137047	6.32939	2.46e-10	2.12e-09
Utp11	537.672	0.806208	0.127589	6.31878	2.64e-10	2.27e-09
Tyw1	376.384	1.21292	0.191981	6.31791	2.65e-10	2.28e-09
Ppp1r10	1191.68	0.715486	0.113271	6.3166	2.67e-10	2.3e-09
Ecscr	43.5635	2.84555	0.450634	6.31454	2.71e-10	2.32e-09
Nop2	505.882	1.01302	0.160497	6.31177	2.76e-10	2.37e-09
Sox11	231.787	2.06772	0.327653	6.31072	2.78e-10	2.38e-09
Serpinh1	1025.82	1.08272	0.171606	6.30933	2.8e-10	2.4e-09
Pold3	510.52	1.40856	0.223339	6.30682	2.85e-10	2.44e-09
Syk	218.304	1.18568	0.188	6.30681	2.85e-10	2.44e-09
Hcrtr1	83.8114	1.94773	0.308931	6.30474	2.89e-10	2.47e-09
Dctn4	2123.3	0.569598	0.0905292	6.29187	3.14e-10	2.68e-09
B3galnt1	972.226	0.937925	0.149168	6.28771	3.22e-10	2.75e-09
Uap1	537.988	0.81439	0.129638	6.28202	3.34e-10	2.84e-09
Zdhhc5	1744.98	0.726822	0.115706	6.28161	3.35e-10	2.84e-09
Arf6	1569.76	0.686088	0.109233	6.28095	3.37e-10	2.85e-09
Olr1	93.9195	2.77793	0.442862	6.27268	3.55e-10	3e-09
Ska1	54.0542	5.3296	0.849726	6.27214	3.56e-10	3.01e-09
Irf1	166.948	1.55019	0.247262	6.26945	3.62e-10	3.06e-09
Wdr77	893.846	0.911951	0.145608	6.26304	3.78e-10	3.18e-09
Pno1	541.852	1.11688	0.178524	6.2562	3.94e-10	3.32e-09
Psmc6	1757.05	0.688852	0.110269	6.24699	4.18e-10	3.52e-09
Reg3g	34.7832	8.56564	1.37272	6.23991	4.38e-10	3.67e-09
Ppp2ca	5465.35	0.579664	0.0928968	6.23987	4.38e-10	3.67e-09
Mcm6	136.877	1.46914	0.235463	6.23934	4.39e-10	3.68e-09
Mvd	507.339	1.43333	0.229877	6.2352	4.51e-10	3.77e-09
Slc66a2	436.825	1.01466	0.162798	6.23262	4.59e-10	3.83e-09
Utp3	516.834	0.838856	0.134595	6.23243	4.59e-10	3.83e-09
Hspa2	431.602	1.17117	0.188116	6.2258	4.79e-10	3.99e-09
Dcaf10	417.838	0.937928	0.150673	6.22493	4.82e-10	4.01e-09
Septin9	1944.64	0.79573	0.127854	6.22372	4.86e-10	4.04e-09
Vti1a	876.805	0.77921	0.1253	6.21873	5.01e-10	4.16e-09
Gpn1	451.599	0.932871	0.150169	6.21214	5.23e-10	4.34e-09
Wdr45b	440.914	0.966336	0.155664	6.20782	5.37e-10	4.45e-09
Akap6	5621.53	0.724931	0.116823	6.2054	5.46e-10	4.51e-09
Sgip1	6715.3	0.850742	0.137148	6.20311	5.54e-10	4.57e-09
Prpf3	512.455	0.885041	0.142766	6.19926	5.67e-10	4.68e-09
Rasa4	134.536	2.0086	0.3241	6.19746	5.74e-10	4.73e-09
Tram1	1203.31	0.70925	0.114568	6.19063	5.99e-10	4.93e-09
Slc4a7	523.272	1.06128	0.171583	6.18524	6.2e-10	5.09e-09
Psmd8	1228.47	0.684779	0.110816	6.17945	6.43e-10	5.27e-09
Hspd1	3781.53	0.740322	0.11983	6.1781	6.49e-10	5.31e-09
Sar1a	2368.11	0.645041	0.104428	6.17692	6.54e-10	5.35e-09
Eif3i	1002.18	0.731596	0.118476	6.17508	6.61e-10	5.41e-09
Pgam5	644.906	0.769821	0.124669	6.1749	6.62e-10	5.41e-09
Capg	138.582	1.78625	0.2893	6.1744	6.64e-10	5.43e-09
Itga1	320.485	1.78065	0.288511	6.17185	6.75e-10	5.51e-09
Spty2d1	602.142	0.903851	0.146523	6.16865	6.89e-10	5.61e-09
Kcnab1	2238.77	0.725113	0.117587	6.16664	6.98e-10	5.68e-09
Rgs16	349.683	1.35592	0.220149	6.15913	7.31e-10	5.94e-09
Coq10b	488.327	0.99244	0.161458	6.14675	7.91e-10	6.42e-09
Arl16	388.237	1.16014	0.188785	6.1453	7.98e-10	6.48e-09
Cebpz	765.478	0.834261	0.135797	6.14345	8.07e-10	6.55e-09
Nup205	501.163	0.798862	0.130083	6.14119	8.19e-10	6.64e-09
Chst11	355.142	0.944817	0.153994	6.13543	8.49e-10	6.87e-09
Cdkn1a	395.786	1.98834	0.324312	6.13095	8.74e-10	7.05e-09
Gnl3	517.291	0.888711	0.144979	6.12992	8.79e-10	7.09e-09
Pmp2	35.0991	3.59508	0.586986	6.12465	9.09e-10	7.32e-09
Pdia3	4315.39	0.547404	0.089385	6.12411	9.12e-10	7.34e-09
Xpnpep1	1076.13	0.673653	0.110092	6.11902	9.42e-10	7.57e-09
Dcakd	328.639	0.977875	0.159835	6.11803	9.47e-10	7.61e-09
Spp1	1405.5	7.60953	1.24417	6.11617	9.59e-10	7.69e-09
Ccng1	4233.22	0.741222	0.12119	6.11617	9.58e-10	7.69e-09
Capza1	1316.63	0.698733	0.114276	6.11441	9.69e-10	7.77e-09
Wnt7b	825.795	1.08741	0.178062	6.10693	1.02e-09	8.13e-09
Baalc	3705.22	1.08899	0.178391	6.10452	1.03e-09	8.25e-09
Pes1	855.008	0.842464	0.138007	6.1045	1.03e-09	8.25e-09
Acp7	25.3509	3.98316	0.652723	6.10237	1.05e-09	8.35e-09
Sec61b	319.724	1.06238	0.174138	6.10081	1.06e-09	8.42e-09
Hspa13	1916.93	0.677858	0.111122	6.1001	1.06e-09	8.45e-09
Psmd4	1352.38	0.578804	0.094994	6.09306	1.11e-09	8.81e-09
Ets2	1424.38	1.09849	0.180361	6.09055	1.13e-09	8.94e-09
Mdfic	178.136	1.88211	0.309316	6.08475	1.17e-09	9.26e-09
Hmgb2l1	116.718	1.87898	0.308839	6.084	1.17e-09	9.29e-09
Slc7a14	547.492	0.899432	0.148087	6.07367	1.25e-09	9.89e-09
Lamc1	1692.62	0.893492	0.147186	6.07051	1.28e-09	1.01e-08
Vasp	316.469	1.03118	0.170002	6.06572	1.31e-09	1.04e-08
Braf	829.94	0.699898	0.115477	6.06093	1.35e-09	1.06e-08
Npm3	124.186	1.56521	0.258258	6.06067	1.36e-09	1.06e-08
Gmds	226.92	1.19984	0.19809	6.05704	1.39e-09	1.09e-08
Mphosph8	1849.82	0.67967	0.112231	6.05598	1.4e-09	1.09e-08
Tiparp	549.872	0.989775	0.163517	6.05304	1.42e-09	1.11e-08
Grpel1	763.498	0.727622	0.120334	6.04667	1.48e-09	1.15e-08
Ostc	537.084	0.908817	0.150365	6.04409	1.5e-09	1.17e-08
Mmp12	32.6197	7.50234	1.24165	6.04224	1.52e-09	1.18e-08
Ccl4	41.1051	4.27187	0.70714	6.04105	1.53e-09	1.19e-08
Actg1	12926.4	1.47543	0.244256	6.04053	1.54e-09	1.2e-08
Cldn4	20.3712	7.79403	1.29162	6.03429	1.6e-09	1.24e-08
Snrpa	199.159	1.1732	0.194558	6.03011	1.64e-09	1.27e-08
Smarca5	1972.6	0.710568	0.117907	6.02653	1.68e-09	1.3e-08
Clptm1l	1462.44	0.670132	0.111203	6.02621	1.68e-09	1.3e-08
Tmed7	2534.52	0.76422	0.126825	6.0258	1.68e-09	1.3e-08
Stip1	3088.93	0.601836	0.0999267	6.02277	1.71e-09	1.33e-08
Slc8a3	456.208	0.855957	0.142127	6.02247	1.72e-09	1.33e-08
Sugt1	895.067	0.736451	0.122508	6.01148	1.84e-09	1.42e-08
Arl4a	835.411	0.895987	0.14913	6.0081	1.88e-09	1.45e-08
Rnps1	1731.8	0.642293	0.106932	6.00655	1.9e-09	1.46e-08
Cct6a	2854.6	0.785964	0.130891	6.00471	1.92e-09	1.47e-08
Dscaml1	1119.13	0.864611	0.144011	6.00377	1.93e-09	1.48e-08
Faf1	557.758	0.789327	0.131481	6.00335	1.93e-09	1.49e-08
Zfp646	614.281	1.00111	0.166809	6.00153	1.95e-09	1.5e-08
Mcoln3	38.3813	6.24808	1.04142	5.9996	1.98e-09	1.52e-08
Rabggtb	1233.77	0.607458	0.101273	5.9982	2e-09	1.53e-08
C1qbp	863.384	0.685551	0.114302	5.99771	2e-09	1.53e-08
Ppp4r3b	1591.4	0.587547	0.0980238	5.99392	2.05e-09	1.57e-08
Pde6b	69.8369	3.99737	0.667056	5.99255	2.07e-09	1.58e-08
Mmp14	154.818	2.18312	0.364823	5.98405	2.18e-09	1.66e-08
Ccdc25	899.016	0.702038	0.11734	5.98294	2.19e-09	1.67e-08
Frat1	155.322	1.38252	0.231142	5.98126	2.21e-09	1.69e-08
Blnk	226.499	1.2918	0.215998	5.98062	2.22e-09	1.69e-08
Crh	209.161	1.68303	0.281443	5.98002	2.23e-09	1.7e-08
Emp3	69.0539	2.04554	0.34224	5.9769	2.27e-09	1.73e-08
Map4k5	1463.47	0.648381	0.108535	5.97395	2.32e-09	1.76e-08
Ythdf2	650.654	0.745617	0.124898	5.96979	2.38e-09	1.8e-08
Plek2	24.9237	4.15369	0.695837	5.96934	2.38e-09	1.81e-08
Tsc22d2	574.327	0.750092	0.125683	5.96812	2.4e-09	1.82e-08
Ubash3b	278.708	1.46369	0.245312	5.96665	2.42e-09	1.84e-08
Rrp9	326.965	0.992508	0.166449	5.96284	2.48e-09	1.88e-08
Rtn4rl2	443.786	1.4142	0.237203	5.96196	2.49e-09	1.89e-08
Slc26a2	87.0708	1.85306	0.310933	5.95966	2.53e-09	1.91e-08
Gcc2	2066.71	0.942911	0.158451	5.95081	2.67e-09	2.01e-08
Nme1	1827.96	0.816461	0.137336	5.94501	2.76e-09	2.08e-08
Psma2	1054.79	0.674046	0.11341	5.94346	2.79e-09	2.1e-08
Ppm1l	3485.91	0.946053	0.159461	5.93281	2.98e-09	2.24e-08
Bicc1	162.42	1.32546	0.22354	5.92939	3.04e-09	2.28e-08
Iqgap1	761.79	0.958073	0.161761	5.92276	3.17e-09	2.37e-08
Irs1	427.969	0.951333	0.160736	5.9186	3.25e-09	2.43e-08
Gad1	4605.11	0.860492	0.145387	5.91865	3.25e-09	2.43e-08
Pcyt2	769.343	0.683748	0.1156	5.91479	3.32e-09	2.48e-08
Bag5	791.827	0.683005	0.115561	5.91036	3.41e-09	2.54e-08
Dspp	30.1946	7.38993	1.2512	5.90628	3.5e-09	2.6e-08
Adgrf2	29.5303	3.67865	0.623096	5.90382	3.55e-09	2.64e-08
Nsfl1c	1661.06	0.750024	0.127104	5.90088	3.62e-09	2.68e-08
Ubxn4	1372.34	0.576503	0.0977336	5.89872	3.66e-09	2.71e-08
Smg7	2117.65	0.657342	0.111461	5.8975	3.69e-09	2.73e-08
Habp4	1737.57	0.654363	0.111069	5.89151	3.83e-09	2.83e-08
Tet3	750.762	0.915978	0.155592	5.88704	3.93e-09	2.9e-08
Nsun2	1069.99	0.866011	0.147194	5.88344	4.02e-09	2.96e-08
Ppid	1411.69	0.643683	0.109477	5.8796	4.11e-09	3.03e-08
Mrps2	883.651	0.725616	0.12342	5.87923	4.12e-09	3.03e-08
Ddx50	860.064	0.645974	0.109896	5.87807	4.15e-09	3.05e-08
Tmem185b	460.277	0.878698	0.149586	5.87419	4.25e-09	3.12e-08
Psmd14	1017.15	0.720961	0.122845	5.86889	4.39e-09	3.22e-08
Gtf2a1	1651.83	0.937804	0.159799	5.86865	4.39e-09	3.22e-08
Lemd3	720.783	1.00041	0.170561	5.86544	4.48e-09	3.28e-08
Blmh	837.471	0.71687	0.122264	5.86331	4.54e-09	3.32e-08
Sh3bp2	174.078	1.303	0.222428	5.85808	4.68e-09	3.42e-08
Rsl1d1	682.619	1.66112	0.283631	5.85661	4.72e-09	3.45e-08
Mpi	523.22	0.788168	0.134655	5.85323	4.82e-09	3.52e-08
Slc37a1	231.767	1.51022	0.258136	5.85049	4.9e-09	3.57e-08
Nipa2	770.941	0.777724	0.133017	5.84682	5.01e-09	3.65e-08
Rpn2	1824.95	0.55303	0.0946149	5.84506	5.06e-09	3.69e-08
Tubgcp3	668.404	0.900904	0.15421	5.84207	5.16e-09	3.75e-08
Nucb1	3812.04	0.71936	0.123177	5.84003	5.22e-09	3.79e-08
Ecm1	115.18	1.5163	0.259687	5.83896	5.25e-09	3.81e-08
Lratd1	2230.59	1.07404	0.184056	5.83543	5.37e-09	3.89e-08
Adgrd1	82.7872	1.82105	0.312201	5.83294	5.45e-09	3.94e-08
Sf3b4	639.968	0.796246	0.136559	5.83077	5.52e-09	3.99e-08
Kif17	252.999	0.992456	0.170323	5.82691	5.65e-09	4.08e-08
Slc20a1	2404.36	0.791698	0.136063	5.81861	5.93e-09	4.27e-08
Malt1	153.205	1.38807	0.238562	5.81849	5.94e-09	4.27e-08
Nr2c2ap	476.539	1.14393	0.196657	5.8169	5.99e-09	4.31e-08
Golt1b	1081.64	0.718522	0.123645	5.81119	6.2e-09	4.45e-08
Ftl1	2396.57	1.40327	0.241983	5.79904	6.67e-09	4.78e-08
Hcn4	191.836	2.53035	0.436401	5.79823	6.7e-09	4.8e-08
Angpt2	113.785	2.55349	0.440457	5.79736	6.74e-09	4.82e-08
Polr2e	642.666	0.810065	0.139853	5.79224	6.95e-09	4.97e-08
Zfr	6914.33	0.577285	0.0996889	5.79087	7e-09	5e-08
Rtcb	1092.26	0.713429	0.1234	5.78143	7.41e-09	5.28e-08
Psmb4	1696.22	0.640258	0.110908	5.7729	7.79e-09	5.55e-08
Sde2	486.434	0.884121	0.153183	5.77167	7.85e-09	5.58e-08
Cacnb1	2386.54	0.536885	0.093144	5.76403	8.21e-09	5.83e-08
Rcan1	1156.8	0.708711	0.122994	5.76214	8.31e-09	5.89e-08
Fhl3	65.1275	1.87484	0.325517	5.75958	8.43e-09	5.97e-08
Tra2b	1752.57	0.609537	0.10587	5.75739	8.54e-09	6.04e-08
Tnn	70.2839	2.00991	0.349173	5.75622	8.6e-09	6.08e-08
Agpat2	31.1418	3.50811	0.610268	5.74847	9.01e-09	6.36e-08
Tomm20	3088.73	0.593143	0.103326	5.74049	9.44e-09	6.66e-08
Rgs19	211.426	1.05675	0.184285	5.73431	9.79e-09	6.89e-08
Pgam1	9658.26	0.55421	0.0966888	5.7319	9.93e-09	6.98e-08
Casp7	142.87	1.26826	0.221323	5.73036	1e-08	7.04e-08
Ak5	3562.95	0.660621	0.115372	5.72601	1.03e-08	7.22e-08
Iars1	1440.88	0.720622	0.125954	5.72133	1.06e-08	7.42e-08
Bysl	391.073	1.08566	0.189794	5.7202	1.06e-08	7.46e-08
Tg	26.8844	3.18553	0.557532	5.71362	1.11e-08	7.73e-08
Cttn	1785.89	0.629671	0.110325	5.70744	1.15e-08	8e-08
Ccdc137	264.873	0.983573	0.172366	5.70632	1.15e-08	8.04e-08
Hdlbp	4646.28	0.64126	0.112429	5.70369	1.17e-08	8.16e-08
Tfg	1119.41	0.62148	0.109145	5.69406	1.24e-08	8.61e-08
Stx1b	6702.22	0.619461	0.108958	5.6853	1.31e-08	9.04e-08
Cd86	43.1301	2.32134	0.408842	5.67785	1.36e-08	9.43e-08
Hs2st1	1726.5	0.539364	0.0950228	5.67616	1.38e-08	9.52e-08
Hells	69.4892	1.70936	0.301164	5.67583	1.38e-08	9.53e-08
Slc35e3	683.597	0.715324	0.126248	5.66601	1.46e-08	1.01e-07
Slc7a5	1662.7	0.989934	0.174732	5.66544	1.47e-08	1.01e-07
Pphln1	740.06	0.763534	0.134781	5.665	1.47e-08	1.01e-07
Psmc1	2696.06	0.546678	0.0966256	5.65769	1.53e-08	1.06e-07
Mapk6	1532.55	0.573369	0.101517	5.64803	1.62e-08	1.11e-07
Cfap36	2007.08	0.607726	0.107655	5.64513	1.65e-08	1.13e-07
Rbm19	271.313	1.11208	0.19715	5.64076	1.69e-08	1.16e-07
Ifngr2	647.286	0.793795	0.14075	5.63977	1.7e-08	1.16e-07
Syt4	2494.96	0.913858	0.162048	5.63942	1.71e-08	1.17e-07
Mettl1	115.253	1.44546	0.25643	5.63684	1.73e-08	1.18e-07
Ppan	241.875	1.06215	0.188464	5.63581	1.74e-08	1.19e-07
Rhbdf2	45.7728	2.55737	0.4538	5.63546	1.75e-08	1.19e-07
Dhrs9	55.6761	2.63297	0.467473	5.63234	1.78e-08	1.21e-07
Fat2	45.293	2.93277	0.520962	5.62952	1.81e-08	1.23e-07
M6pr	1727.74	0.569038	0.101102	5.62836	1.82e-08	1.24e-07
Ehd2	219.755	1.16581	0.207186	5.62689	1.83e-08	1.25e-07
Cers5	914.006	0.598979	0.106476	5.62548	1.85e-08	1.26e-07
Plaa	1048.65	0.728873	0.129681	5.6205	1.9e-08	1.29e-07
Txnl1	1765.91	0.592448	0.105431	5.61932	1.92e-08	1.3e-07
Cwc15	647.235	0.766749	0.136523	5.61627	1.95e-08	1.32e-07
Stc1	162.861	1.57849	0.281137	5.61464	1.97e-08	1.33e-07
Mis18a	49.489	4.70012	0.837221	5.61395	1.98e-08	1.34e-07
Utp15	730.541	0.94769	0.16881	5.61394	1.98e-08	1.34e-07
Psmd6	1319.72	0.588044	0.104986	5.60118	2.13e-08	1.43e-07
Zdhhc22	200.841	1.3146	0.234732	5.60041	2.14e-08	1.44e-07
Ltbr	272.623	1.04367	0.186372	5.59993	2.14e-08	1.44e-07
Clec5a	41.9312	4.08668	0.730039	5.59789	2.17e-08	1.46e-07
Txn1	446.856	0.777184	0.139004	5.59109	2.26e-08	1.51e-07
Itprip	58.3968	2.07379	0.370997	5.58977	2.27e-08	1.53e-07
Pfdn4	325.165	1.10977	0.198568	5.58885	2.29e-08	1.53e-07
Dcbld2	457.699	0.841234	0.150685	5.58272	2.37e-08	1.58e-07
Krit1	1065.13	0.678007	0.121504	5.58013	2.4e-08	1.61e-07
Hnrnpd	1892.54	0.565799	0.101436	5.57791	2.43e-08	1.63e-07
Hspa4	5415.23	0.523907	0.0940082	5.57299	2.5e-08	1.67e-07
Ppp1r12c	1825.29	0.587535	0.105504	5.56885	2.56e-08	1.71e-07
Mrtfa	901.302	0.745483	0.133882	5.56822	2.57e-08	1.71e-07
Srp68	1328.9	0.55746	0.100156	5.56592	2.61e-08	1.73e-07
Ifnar2	553.928	0.750286	0.134886	5.56236	2.66e-08	1.77e-07
Dcstamp	25.4699	6.23991	1.12184	5.5622	2.66e-08	1.77e-07
Cavin3	283.321	0.974328	0.175197	5.56133	2.68e-08	1.78e-07
Scimp	21.1656	4.59506	0.826299	5.56101	2.68e-08	1.78e-07
Agpat4	1309.31	0.843825	0.151794	5.55902	2.71e-08	1.8e-07
Snai1	45.2808	2.01767	0.363064	5.55735	2.74e-08	1.81e-07
Gpr85	826.809	1.03375	0.18607	5.55573	2.76e-08	1.83e-07
Rpf2	349.588	0.859425	0.154703	5.55533	2.77e-08	1.83e-07
Nup93	321	1.00799	0.181449	5.55522	2.77e-08	1.83e-07
Plekhb2	7199.2	0.572072	0.103007	5.55373	2.8e-08	1.85e-07
Tpt1	9206.21	0.637004	0.114726	5.55241	2.82e-08	1.86e-07
Eif3a	4813.22	0.674369	0.121714	5.54059	3.01e-08	1.99e-07
Pcbp2	2713.48	0.534597	0.0965202	5.53871	3.05e-08	2.01e-07
Cep85	563.397	0.862669	0.155902	5.53342	3.14e-08	2.06e-07
Ptprn	9851.49	0.72538	0.131127	5.53189	3.17e-08	2.08e-07
Ngfr	38.5731	2.92148	0.528188	5.53113	3.18e-08	2.09e-07
Ybx1	1488.4	0.741502	0.134067	5.53082	3.19e-08	2.09e-07
Adamts7	32.4535	2.63937	0.477273	5.5301	3.2e-08	2.1e-07
Ddx19b	677.238	0.709319	0.128266	5.53007	3.2e-08	2.1e-07
Pdcl3	473.713	1.077	0.194799	5.52879	3.22e-08	2.11e-07
Nol11	579.096	0.743704	0.134591	5.52565	3.28e-08	2.15e-07
Fgf1	1073.93	5.1556	0.933385	5.52355	3.32e-08	2.17e-07
Pim1	56.8391	2.02132	0.366289	5.51835	3.42e-08	2.24e-07
Gdpd1	943.768	0.604154	0.109528	5.51599	3.47e-08	2.26e-07
Tbrg1	406.374	0.875495	0.158784	5.51376	3.51e-08	2.29e-07
Cltb	1856.69	0.564621	0.102456	5.51084	3.57e-08	2.32e-07
Itgb2	324.108	1.46176	0.265275	5.51036	3.58e-08	2.33e-07
Lrrc25	31.0115	3.51897	0.638966	5.50729	3.64e-08	2.36e-07
Zc3h15	1837.38	0.674959	0.122563	5.50705	3.65e-08	2.37e-07
Upf1	912.44	0.769431	0.140011	5.49552	3.9e-08	2.52e-07
Ccnf	159.6	1.37716	0.250676	5.49377	3.93e-08	2.54e-07
Ankib1	1546.91	0.551045	0.100313	5.49325	3.95e-08	2.55e-07
Ruvbl2	455.736	0.896447	0.163289	5.48994	4.02e-08	2.59e-07
Hspb8	485.007	1.20509	0.219563	5.48859	4.05e-08	2.61e-07
Utp4	386.99	0.921555	0.167925	5.4879	4.07e-08	2.62e-07
Tmem238	96.0101	1.55286	0.282968	5.48777	4.07e-08	2.62e-07
Sh3gl3	816.453	0.628652	0.11457	5.48706	4.09e-08	2.63e-07
Heatr3	304.745	0.876113	0.159754	5.48415	4.15e-08	2.67e-07
Rnf20	1029.34	0.69937	0.127545	5.4833	4.17e-08	2.68e-07
Epgn	26.7069	3.4952	0.63785	5.47965	4.26e-08	2.74e-07
Atp6v1b2	11551	0.647097	0.118128	5.47794	4.3e-08	2.76e-07
Ube2w	1133.01	0.641598	0.117155	5.47649	4.34e-08	2.78e-07
Adamtsl1	103.246	2.02866	0.370562	5.47453	4.39e-08	2.81e-07
Fam216a	465.077	0.774645	0.141697	5.46692	4.58e-08	2.93e-07
Arhgef15	266.353	1.88258	0.344403	5.46622	4.6e-08	2.94e-07
Chst10	1367.42	0.815267	0.149201	5.46422	4.65e-08	2.97e-07
Trem1	13.9685	7.24767	1.32733	5.46035	4.75e-08	3.03e-07
Sec31a	1013.09	0.590034	0.108057	5.46042	4.75e-08	3.03e-07
Mapkapk3	303.819	0.956683	0.175214	5.4601	4.76e-08	3.04e-07
Adipor1	1333.3	0.847847	0.155365	5.45713	4.84e-08	3.08e-07
Mdc1	233.078	0.92508	0.169622	5.45376	4.93e-08	3.14e-07
Saraf	2562.82	0.506732	0.0929177	5.45355	4.94e-08	3.14e-07
Il18rap	28.2445	3.00514	0.551113	5.45286	4.96e-08	3.15e-07
Brpf1	589.006	0.733004	0.134638	5.44425	5.2e-08	3.3e-07
Mybpc3	22.1025	3.96931	0.730317	5.43504	5.48e-08	3.46e-07
Prkaa1	702.872	0.761584	0.140145	5.43426	5.5e-08	3.47e-07
Rbm15b	1211.64	0.831119	0.152949	5.43397	5.51e-08	3.48e-07
Anp32b	1198.12	0.725692	0.133583	5.4325	5.56e-08	3.5e-07
Rnf145	1427.41	0.755849	0.139179	5.43077	5.61e-08	3.53e-07
Mapre1	1533.3	0.671231	0.123624	5.42962	5.65e-08	3.56e-07
Pdcd6	640.086	0.67284	0.123938	5.42886	5.67e-08	3.57e-07
Cxxc5	1821.88	0.626159	0.115453	5.42351	5.84e-08	3.68e-07
Sec24a	734.395	0.636728	0.117408	5.42323	5.85e-08	3.68e-07
Col12a1	343.641	1.33887	0.247076	5.41884	6e-08	3.77e-07
Ipo7	3595.16	0.585357	0.10811	5.41444	6.15e-08	3.86e-07
Nolc1	1908.4	0.653134	0.120713	5.41065	6.28e-08	3.94e-07
Plekha7	273.357	1.039	0.192081	5.40918	6.33e-08	3.97e-07
Riok1	482.606	0.743655	0.137523	5.40749	6.39e-08	4e-07
Uspl1	558.15	0.711141	0.131528	5.40677	6.42e-08	4.02e-07
Zfp189	617.146	1.30244	0.241067	5.40279	6.56e-08	4.1e-07
Sfrp2	98.3609	1.81517	0.336184	5.39932	6.69e-08	4.18e-07
Morc3	724.513	0.713416	0.132155	5.39834	6.73e-08	4.2e-07
Ptpn21	191.949	1.09838	0.203607	5.39462	6.87e-08	4.28e-07
Siah3	56.004	2.14473	0.397918	5.38988	7.05e-08	4.39e-07
Cth	142.338	1.38262	0.256649	5.38719	7.16e-08	4.46e-07
Ttll12	440.186	0.958549	0.178163	5.38018	7.44e-08	4.62e-07
Gorab	366.027	0.87336	0.162327	5.38025	7.44e-08	4.62e-07
Aopep	260.646	1.1842	0.220225	5.37722	7.56e-08	4.69e-07
Bhlhe40	1725.18	0.75657	0.140802	5.3733	7.73e-08	4.79e-07
Gorasp2	1596.55	0.590698	0.109949	5.37248	7.77e-08	4.8e-07
Prr15	51.0836	2.22779	0.414695	5.37211	7.78e-08	4.81e-07
Polq	30.4186	2.7969	0.520646	5.37198	7.79e-08	4.81e-07
Spry2	1338.08	0.643089	0.119791	5.3684	7.94e-08	4.9e-07
Xpot	2456.31	0.641837	0.119685	5.36271	8.2e-08	5.06e-07
Utp14a	286.428	0.871982	0.162611	5.36238	8.21e-08	5.06e-07
Washc4	1335.29	0.596611	0.111338	5.35856	8.39e-08	5.17e-07
Trim36	187.87	1.3922	0.259844	5.35783	8.42e-08	5.18e-07
Mcl1	931.667	0.586182	0.109413	5.35752	8.44e-08	5.19e-07
Nfkbiz	157.897	1.68241	0.314137	5.35565	8.52e-08	5.24e-07
Trio	4485.92	0.651788	0.121736	5.35409	8.6e-08	5.29e-07
Nrp2	363.56	1.07674	0.201148	5.35299	8.65e-08	5.32e-07
Copa	2956.46	0.529219	0.0989616	5.34772	8.91e-08	5.47e-07
H2ax	327.914	0.784788	0.146874	5.34326	9.13e-08	5.6e-07
Loxhd1	50.6736	3.14799	0.589178	5.34303	9.14e-08	5.6e-07
Tardbp	3129.91	0.499947	0.0935704	5.343	9.14e-08	5.6e-07
Msh5	24.1821	4.50588	0.843957	5.339	9.35e-08	5.72e-07
Akap17a	1036.5	0.567788	0.106376	5.33754	9.42e-08	5.76e-07
Ube2f	485.154	0.731971	0.137149	5.33705	9.45e-08	5.77e-07
Fnip2	432.742	0.854179	0.160227	5.33106	9.76e-08	5.95e-07
Dars1	916.264	0.633344	0.118909	5.3263	1e-07	6.1e-07
Tax1bp3	149.303	1.30959	0.245897	5.32578	1.01e-07	6.12e-07
Morf4l2	4676.63	0.555495	0.104575	5.31195	1.08e-07	6.59e-07
Brms1	685.688	0.835684	0.157394	5.30949	1.1e-07	6.68e-07
Ttc19	1025.28	0.657282	0.123832	5.30787	1.11e-07	6.72e-07
Tp53	383.475	0.814208	0.1534	5.30776	1.11e-07	6.72e-07
Celf6	191.064	1.34547	0.253573	5.30603	1.12e-07	6.78e-07
Micall1	740.158	0.704336	0.132741	5.30609	1.12e-07	6.78e-07
Kcng3	54.9293	1.89594	0.357336	5.30576	1.12e-07	6.78e-07
Srpra	1292.5	0.533896	0.100714	5.30111	1.15e-07	6.94e-07
Sap30	170.302	1.0533	0.198774	5.29897	1.16e-07	7.02e-07
Prdx1	1778.22	0.598978	0.11309	5.29648	1.18e-07	7.11e-07
Cep164	373.746	0.769185	0.145231	5.29628	1.18e-07	7.11e-07
Htr1b	235.058	1.5514	0.292947	5.29584	1.18e-07	7.13e-07
Gpr3	112.53	1.49284	0.282049	5.29284	1.2e-07	7.24e-07
Atp13a3	1517.47	0.723097	0.136693	5.28992	1.22e-07	7.35e-07
Adss	1273.11	0.752569	0.142284	5.28921	1.23e-07	7.37e-07
Stx11	44.6235	2.22605	0.421529	5.28088	1.29e-07	7.69e-07
Rnf122	103.507	1.47488	0.279308	5.28048	1.29e-07	7.7e-07
Spns2	991.395	0.998006	0.189031	5.27958	1.29e-07	7.73e-07
Wdhd1	121.736	1.51542	0.287059	5.27912	1.3e-07	7.75e-07
Pycr1	108.623	1.40236	0.265657	5.27883	1.3e-07	7.76e-07
Cmklr1	87.8748	1.97156	0.37392	5.27266	1.34e-07	8.01e-07
Rps6	2779.57	1.25409	0.237898	5.27153	1.35e-07	8.06e-07
Cct7	2860.8	0.531568	0.100838	5.27151	1.35e-07	8.06e-07
Ccl3	68.5456	6.70816	1.27274	5.27066	1.36e-07	8.09e-07
Csde1	4910.95	0.489338	0.0928468	5.27038	1.36e-07	8.1e-07
Heatr1	453.978	0.987459	0.187407	5.26906	1.37e-07	8.15e-07
Il6	57.6935	3.58777	0.681186	5.26695	1.39e-07	8.24e-07
Ppm1e	2019.67	0.765931	0.145435	5.26649	1.39e-07	8.25e-07
Ppme1	3086.14	0.646201	0.122734	5.26503	1.4e-07	8.31e-07
Got2	3640.09	0.540109	0.102636	5.26237	1.42e-07	8.43e-07
Vars1	692.243	0.681239	0.129482	5.26128	1.43e-07	8.48e-07
Ubn1	1287.01	0.572975	0.108924	5.2603	1.44e-07	8.52e-07
Rexo4	648.36	0.817962	0.155531	5.25915	1.45e-07	8.57e-07
Ankrd13c	3306.94	0.714357	0.135851	5.25837	1.45e-07	8.6e-07
Nup153	1302.87	0.679018	0.129221	5.2547	1.48e-07	8.77e-07
Zxdc	379.76	0.730207	0.139097	5.24964	1.52e-07	8.99e-07
Cemip	418.945	1.52178	0.290016	5.24724	1.54e-07	9.09e-07
Dstn	2393.5	0.63564	0.12119	5.24497	1.56e-07	9.2e-07
Soat1	465.195	0.692078	0.132032	5.24175	1.59e-07	9.36e-07
Larp4	834.722	0.605301	0.11548	5.2416	1.59e-07	9.36e-07
Far1	2026.26	0.528763	0.100878	5.24159	1.59e-07	9.36e-07
Ppib	1097.07	0.612756	0.116971	5.23853	1.62e-07	9.51e-07
Megf11	512.879	1.37863	0.263191	5.23814	1.62e-07	9.52e-07
Pthlh	69.9131	2.07238	0.395729	5.23687	1.63e-07	9.58e-07
Amotl1	237.67	1.08484	0.207338	5.23223	1.67e-07	9.81e-07
Rpl17	2413.9	0.67734	0.129504	5.23027	1.69e-07	9.9e-07
Trnt1	618.113	0.728943	0.139403	5.22905	1.7e-07	9.95e-07
Loxl4	35.8385	2.32757	0.445199	5.22815	1.71e-07	1e-06
Pwwp2a	452.493	0.824962	0.157822	5.22718	1.72e-07	1e-06
Kdelr2	542.501	0.722371	0.138213	5.2265	1.73e-07	1.01e-06
Magi3	1749.16	0.517963	0.0991441	5.22434	1.75e-07	1.02e-06
Rhoa	4028.09	0.496521	0.095039	5.22439	1.75e-07	1.02e-06
Gpx2	22.2446	5.04549	0.966086	5.22261	1.76e-07	1.03e-06
Dusp2	71.0648	1.66204	0.31849	5.2185	1.8e-07	1.05e-06
Fam167a	47.9948	2.87694	0.551384	5.21767	1.81e-07	1.05e-06
Kpna1	2513.65	0.595229	0.114114	5.21608	1.83e-07	1.06e-06
Sdk2	574.685	0.795548	0.152525	5.21585	1.83e-07	1.06e-06
Spata5	197.486	1.06954	0.205079	5.21528	1.84e-07	1.07e-06
RGD1308750	40.2659	3.83625	0.735634	5.21489	1.84e-07	1.07e-06
Ssbp3	1558.25	0.60679	0.116416	5.21225	1.87e-07	1.08e-06
Taldo1	1177.87	0.540024	0.103634	5.21088	1.88e-07	1.09e-06
Nob1	630.014	0.736358	0.14133	5.21021	1.89e-07	1.09e-06
Cd68	26.8386	2.66848	0.512201	5.20984	1.89e-07	1.09e-06
Plpp4	146.781	1.64573	0.315968	5.20853	1.9e-07	1.1e-06
Fads3	452.458	0.894301	0.171847	5.20407	1.95e-07	1.13e-06
Aspm	94.04	1.52598	0.293443	5.20026	1.99e-07	1.15e-06
H2az1	1641.11	0.684886	0.13171	5.19995	1.99e-07	1.15e-06
Tpst1	443.911	0.742905	0.142945	5.19715	2.02e-07	1.16e-06
Rgs4	10826.9	1.19759	0.230451	5.19673	2.03e-07	1.17e-06
Nck2	651.984	0.618215	0.118989	5.19558	2.04e-07	1.17e-06
Slc5a3	440.132	0.993643	0.191368	5.19232	2.08e-07	1.19e-06
Nlrp10	23.2177	7.00971	1.3507	5.18969	2.11e-07	1.21e-06
Gar1	197.809	1.20176	0.231948	5.18115	2.21e-07	1.26e-06
Usp37	964.26	0.549844	0.106133	5.1807	2.21e-07	1.26e-06
Syne3	78.1255	1.39869	0.270027	5.17981	2.22e-07	1.27e-06
Slc14a1	1072.5	1.02947	0.198937	5.17487	2.28e-07	1.3e-06
Adgrl3	2067.26	1.02234	0.197627	5.17309	2.3e-07	1.31e-06
Farsb	716.133	0.85126	0.16456	5.17294	2.3e-07	1.31e-06
Slc7a11	856.256	1.17934	0.227987	5.17282	2.31e-07	1.31e-06
Rnd3	388.993	0.999152	0.193263	5.1699	2.34e-07	1.33e-06
Gng5	14.1346	7.26495	1.40532	5.16962	2.35e-07	1.33e-06
Emc6	400.648	0.899277	0.174002	5.16819	2.36e-07	1.34e-06
Akirin2	948.621	0.599517	0.116005	5.16805	2.37e-07	1.34e-06
Btaf1	1166.08	0.597575	0.115715	5.16421	2.41e-07	1.37e-06
Mgat2	269.445	0.875986	0.169691	5.16223	2.44e-07	1.38e-06
Zfp330	798.188	0.589867	0.114278	5.16168	2.45e-07	1.39e-06
Snx7	478.716	0.985541	0.190987	5.16026	2.47e-07	1.4e-06
Gprc5a	147.685	4.50193	0.872891	5.15749	2.5e-07	1.42e-06
Tlk2	807.923	0.585411	0.113677	5.14976	2.61e-07	1.47e-06
Slc30a7	237.405	1.02803	0.199744	5.14673	2.65e-07	1.49e-06
Scnn1a	25.0314	3.27078	0.635807	5.14429	2.69e-07	1.51e-06
Bclaf1	3911.83	0.550843	0.10712	5.14231	2.71e-07	1.53e-06
Aup1	693.47	0.629179	0.122408	5.14003	2.75e-07	1.55e-06
Slco4a1	40.8448	2.34005	0.455357	5.13893	2.76e-07	1.55e-06
Mcam	799.171	1.23926	0.241269	5.13641	2.8e-07	1.57e-06
Serp1	1825.71	0.674625	0.131343	5.13637	2.8e-07	1.57e-06
Uso1	2487.92	0.593596	0.115684	5.13116	2.88e-07	1.61e-06
Cfl1	10491.9	0.507615	0.0989384	5.13061	2.89e-07	1.62e-06
Rpl4	6941.47	0.446662	0.0871055	5.12783	2.93e-07	1.64e-06
Derl1	1134.97	0.524491	0.102286	5.1277	2.93e-07	1.64e-06
Fndc3b	296.347	0.837244	0.16339	5.12421	2.99e-07	1.67e-06
Septin6	1282.77	0.663737	0.129563	5.1229	3.01e-07	1.68e-06
Cab39	3389.64	0.503128	0.0982435	5.12123	3.04e-07	1.7e-06
Eef1b2	1835.36	0.593257	0.115853	5.12075	3.04e-07	1.7e-06
Dtl	73.6835	1.71557	0.335958	5.10649	3.28e-07	1.83e-06
Rcc2	1482.2	0.550685	0.107856	5.10573	3.3e-07	1.84e-06
Kctd9	393.99	1.01698	0.199197	5.10541	3.3e-07	1.84e-06
Myl4	69.8389	2.5972	0.508796	5.1046	3.31e-07	1.84e-06
Ssb	1895.9	0.539021	0.105642	5.10236	3.35e-07	1.86e-06
Prkrip1	273.313	0.787777	0.154541	5.09751	3.44e-07	1.91e-06
Cops5	908.641	0.540796	0.106096	5.09722	3.45e-07	1.91e-06
Nol3	246.209	1.16615	0.228979	5.09281	3.53e-07	1.95e-06
Pdp1	2331.2	0.867397	0.170327	5.09255	3.53e-07	1.96e-06
Cct8	2591.01	0.524449	0.102982	5.09261	3.53e-07	1.96e-06
Trappc13	1383.57	0.617506	0.121296	5.0909	3.56e-07	1.97e-06
Eid1	4472.33	0.796189	0.156408	5.09045	3.57e-07	1.98e-06
Snrpb	730.351	0.626638	0.123126	5.0894	3.59e-07	1.99e-06
Ccdc77	92.2859	1.51415	0.297586	5.08813	3.62e-07	2e-06
Rtraf	1014.47	0.567876	0.11165	5.08623	3.65e-07	2.02e-06
Hnrnpa1	3819.53	0.661907	0.130144	5.08598	3.66e-07	2.02e-06
Ano4	830.216	1.02308	0.201193	5.08507	3.67e-07	2.03e-06
Fndc3c1	13.6452	7.21538	1.4193	5.08377	3.7e-07	2.04e-06
Anxa7	960.703	0.740701	0.145718	5.08311	3.71e-07	2.05e-06
Psmd3	1782.34	0.515637	0.101535	5.07844	3.81e-07	2.1e-06
Dnhd1	411.314	1.03372	0.203562	5.07816	3.81e-07	2.1e-06
Flcn	893.104	0.667945	0.131719	5.07097	3.96e-07	2.17e-06
Copb1	1175.85	0.518642	0.102333	5.06818	4.02e-07	2.2e-06
Bin3	427.236	0.75151	0.148355	5.06561	4.07e-07	2.23e-06
Samd1	496.202	0.770177	0.152054	5.06517	4.08e-07	2.24e-06
Psmd2	3364.59	0.538497	0.106347	5.0636	4.11e-07	2.25e-06
Slc3a2	2581.19	0.577376	0.114265	5.05294	4.35e-07	2.38e-06
Rsl24d1	706.515	0.899701	0.178279	5.0466	4.5e-07	2.46e-06
Strap	2297.26	0.499103	0.0989014	5.04647	4.5e-07	2.46e-06
Gtf2h1	681.14	0.578151	0.114582	5.04573	4.52e-07	2.46e-06
Pfkfb4	124.891	1.17137	0.232285	5.04283	4.59e-07	2.5e-06
Stoml2	638.087	0.628302	0.124674	5.03955	4.67e-07	2.54e-06
Mthfd1l	426.705	0.788299	0.156442	5.03892	4.68e-07	2.55e-06
Il1rl2	20.3412	3.07738	0.610797	5.03831	4.7e-07	2.55e-06
Prpf40a	1318.18	0.620645	0.1232	5.03769	4.71e-07	2.56e-06
Clec12a	41.8927	2.91515	0.579052	5.03434	4.79e-07	2.6e-06
E2f5	148.184	1.236	0.245665	5.03126	4.87e-07	2.64e-06
Ggta1	165.257	1.14448	0.227654	5.02728	4.97e-07	2.7e-06
Prmt1	1064.41	0.671052	0.133499	5.02664	4.99e-07	2.7e-06
Cdc34	827.199	0.663602	0.132151	5.02156	5.13e-07	2.77e-06
Eif4ebp1	74.3012	1.52661	0.304316	5.01655	5.26e-07	2.84e-06
Galt	187.098	1.13783	0.227059	5.01115	5.41e-07	2.92e-06
Ddx24	1774.56	0.530861	0.105981	5.009	5.47e-07	2.95e-06
Nhlrc1	300.947	0.790599	0.157854	5.00841	5.49e-07	2.96e-06
ST7	271.433	0.956071	0.190912	5.00791	5.5e-07	2.97e-06
Pmfbp1	31.7989	2.3764	0.474824	5.00479	5.59e-07	3.01e-06
Cbfb	425.957	0.695331	0.138942	5.00445	5.6e-07	3.02e-06
Colgalt2	208.644	1.12437	0.22499	4.99744	5.81e-07	3.12e-06
Eif4g2	14644.1	0.545215	0.109099	4.99742	5.81e-07	3.12e-06
Zik1	223.615	1.131	0.226599	4.99119	6e-07	3.22e-06
Hat1	329.863	0.835845	0.167565	4.9882	6.09e-07	3.26e-06
Ddx27	575.899	0.662244	0.132827	4.98577	6.17e-07	3.3e-06
Lrrc15	28.6002	6.39961	1.28371	4.98525	6.19e-07	3.31e-06
Gskip	426.21	0.79595	0.159734	4.98296	6.26e-07	3.34e-06
Hsd17b7	119.429	1.35979	0.273057	4.97986	6.36e-07	3.39e-06
Cmtm6	391.211	0.731126	0.146842	4.97899	6.39e-07	3.4e-06
Lsg1	396.157	0.728681	0.146407	4.97709	6.45e-07	3.43e-06
Gad2	1547.8	0.887847	0.178493	4.97413	6.55e-07	3.48e-06
Glis3	565.767	1.5952	0.320834	4.97204	6.63e-07	3.52e-06
Serpinb2	24.1619	6.16467	1.24011	4.97108	6.66e-07	3.53e-06
A2m	173.347	1.53657	0.309207	4.96939	6.72e-07	3.56e-06
Blvrb	390.926	0.890265	0.179201	4.96797	6.77e-07	3.58e-06
Cyb561	805.853	0.923934	0.185983	4.96783	6.77e-07	3.58e-06
Sap30bp	931.176	0.609773	0.122814	4.96503	6.87e-07	3.63e-06
RGD1304884	6663.95	0.581243	0.117106	4.96341	6.93e-07	3.66e-06
Lyzl4	172.711	2.07101	0.41731	4.96277	6.95e-07	3.67e-06
Klhl33	25.3248	2.5625	0.516454	4.96173	6.99e-07	3.69e-06
Akr1b8	38.6465	3.57756	0.721063	4.96151	6.99e-07	3.69e-06
Ednrb	739.298	0.833925	0.168095	4.96103	7.01e-07	3.7e-06
Lacc1	33.5317	2.26295	0.456219	4.96023	7.04e-07	3.71e-06
Galnt1	2122.19	0.727965	0.146792	4.95917	7.08e-07	3.73e-06
Ctdp1	463.349	0.669818	0.135068	4.95911	7.08e-07	3.73e-06
Rc3h2	1768.43	0.476847	0.0961563	4.95908	7.08e-07	3.73e-06
Bak1	175.053	1.01768	0.205334	4.95622	7.19e-07	3.78e-06
Zbtb38	1677.04	0.485349	0.0979339	4.95589	7.2e-07	3.79e-06
Alpl	182.709	0.95601	0.192928	4.95526	7.22e-07	3.8e-06
Sec61g	575.698	0.662515	0.133702	4.95517	7.23e-07	3.8e-06
Il2rb	17.3851	4.63786	0.936229	4.95377	7.28e-07	3.82e-06
Trim15	110.734	1.3296	0.268514	4.95169	7.36e-07	3.86e-06
Map3k4	852.943	0.604108	0.121997	4.95181	7.35e-07	3.86e-06
Rplp0	5050.27	0.548681	0.110835	4.95045	7.4e-07	3.88e-06
Ppm1j	52.1424	2.14526	0.433742	4.94594	7.58e-07	3.96e-06
Rundc3b	767.38	0.588988	0.119086	4.94591	7.58e-07	3.96e-06
Sart1	891.703	0.649964	0.131432	4.94525	7.6e-07	3.97e-06
Pprc1	443.113	0.794328	0.160634	4.94496	7.62e-07	3.98e-06
C2cd4a	32.696	3.45381	0.700188	4.93268	8.11e-07	4.23e-06
Polr1e	184.432	1.2995	0.263523	4.93124	8.17e-07	4.26e-06
Tspan31	618.961	0.585013	0.118675	4.92955	8.24e-07	4.29e-06
Tbl2	292.638	0.764268	0.155123	4.92686	8.36e-07	4.35e-06
Bag3	325.801	1.30869	0.265697	4.9255	8.41e-07	4.37e-06
Chac1	167.514	1.33549	0.271207	4.92423	8.47e-07	4.4e-06
Emilin3	30.0095	2.97436	0.604925	4.9169	8.79e-07	4.56e-06
Shc1	374.279	0.808447	0.164428	4.91672	8.8e-07	4.57e-06
Rps4x	2777.34	1.17325	0.238976	4.90951	9.13e-07	4.73e-06
Jmjd6	256.288	0.796779	0.162366	4.90731	9.23e-07	4.78e-06
Pde9a	599.045	0.945508	0.192681	4.90711	9.24e-07	4.78e-06
Adamts8	58.2716	1.93585	0.394751	4.90398	9.39e-07	4.85e-06
Sfmbt2	141.631	2.08076	0.424338	4.90354	9.41e-07	4.86e-06
Clcn7	937.427	0.517578	0.105568	4.90278	9.45e-07	4.88e-06
Pmm2	503.245	0.637627	0.13007	4.90219	9.48e-07	4.89e-06
Anxa5	1202.92	0.57604	0.117542	4.90072	9.55e-07	4.92e-06
Pla1a	182.497	1.67597	0.342075	4.8994	9.61e-07	4.95e-06
Aimp2	271.884	0.882968	0.180291	4.89746	9.71e-07	5e-06
Nrxn3	3956.38	0.803559	0.1643	4.89079	1e-06	5.16e-06
Birc3	46.2437	2.50061	0.511833	4.8856	1.03e-06	5.3e-06
Fdft1	1992.94	0.840306	0.172133	4.88174	1.05e-06	5.4e-06
Sh2d1b2	75.4053	1.85295	0.379667	4.88045	1.06e-06	5.43e-06
Prdx5	1834.64	0.590291	0.121062	4.87592	1.08e-06	5.54e-06
Slc25a24	128.285	1.43733	0.294984	4.87255	1.1e-06	5.63e-06
Has1	72.4944	2.47293	0.50806	4.86741	1.13e-06	5.77e-06
Dld	2859.8	0.506221	0.104048	4.86526	1.14e-06	5.83e-06
Tbc1d15	788.642	0.557167	0.114553	4.86384	1.15e-06	5.87e-06
Cdk4	638.607	0.611907	0.125847	4.86233	1.16e-06	5.91e-06
Rpn1	3376.89	0.415238	0.0854584	4.85895	1.18e-06	6.01e-06
Pum3	620.794	0.831743	0.171373	4.8534	1.21e-06	6.17e-06
Ldlrad4	509.785	0.800686	0.164993	4.85284	1.22e-06	6.19e-06
Pigx	261.897	0.821331	0.169282	4.85184	1.22e-06	6.21e-06
Pwp2	573.633	0.721739	0.148902	4.84707	1.25e-06	6.36e-06
Jpt2	223.543	0.85531	0.176597	4.84328	1.28e-06	6.47e-06
Mcm2	99.5253	1.43057	0.295456	4.84192	1.29e-06	6.51e-06
Rpl8	2578.83	0.994414	0.205471	4.83967	1.3e-06	6.58e-06
Txndc9	802.463	0.686918	0.141976	4.83825	1.31e-06	6.63e-06
Cblb	307.478	0.857162	0.177182	4.83774	1.31e-06	6.64e-06
Marchf3	87.7798	1.25058	0.258561	4.8367	1.32e-06	6.67e-06
Bcl2a1	42.3759	2.63104	0.544261	4.83414	1.34e-06	6.75e-06
Ttc13	612.466	0.598299	0.123798	4.83288	1.35e-06	6.79e-06
Eif4g1	6520.84	0.499383	0.103436	4.82792	1.38e-06	6.96e-06
Polr2c	660.556	0.560088	0.116023	4.8274	1.38e-06	6.98e-06
Actr3	3944.55	0.508425	0.105324	4.82726	1.38e-06	6.98e-06
Rybp	1538.66	0.660245	0.136878	4.82361	1.41e-06	7.1e-06
Gpr19	149.176	1.00038	0.207428	4.82279	1.42e-06	7.13e-06
Gpr83	375.492	0.958444	0.198736	4.8227	1.42e-06	7.13e-06
Arid5a	171.504	1.2962	0.268968	4.81916	1.44e-06	7.25e-06
Mphosph10	296.621	0.881132	0.182931	4.81674	1.46e-06	7.34e-06
Pisd	518.977	0.646135	0.134197	4.81483	1.47e-06	7.41e-06
Snrnp200	2924.62	0.523333	0.108741	4.81268	1.49e-06	7.48e-06
Rxfp3	33.9136	2.43103	0.5055	4.80916	1.52e-06	7.61e-06
Pik3r1	2193.12	0.739342	0.153833	4.80614	1.54e-06	7.71e-06
Fem1c	659.224	0.737898	0.153653	4.80236	1.57e-06	7.85e-06
Rps6ka3	2472.51	0.779458	0.162461	4.79781	1.6e-06	8.02e-06
Mcm10	28.0724	3.09503	0.645122	4.7976	1.61e-06	8.03e-06
Wdr75	435.618	0.652356	0.135978	4.79752	1.61e-06	8.03e-06
Crispld2	116.62	1.78017	0.371132	4.79661	1.61e-06	8.06e-06
Ssr2	409.133	0.728999	0.151993	4.79627	1.62e-06	8.07e-06
Tmx3	1302.25	0.620494	0.12939	4.79555	1.62e-06	8.1e-06
Snu13	946.435	1.26546	0.264224	4.78932	1.67e-06	8.34e-06
Ppl	74.6035	1.42587	0.297825	4.78762	1.69e-06	8.4e-06
Riok2	326.73	0.926295	0.193518	4.7866	1.7e-06	8.43e-06
Odf2	920.326	0.554923	0.115994	4.78406	1.72e-06	8.53e-06
Tbl3	283.513	0.836094	0.174861	4.78149	1.74e-06	8.64e-06
Galr1	26.1398	2.63541	0.551379	4.77968	1.76e-06	8.71e-06
Itgal	43.1706	2.0733	0.433846	4.77888	1.76e-06	8.74e-06
Pcgf5	167.231	0.977426	0.204607	4.77708	1.78e-06	8.81e-06
Lima1	387.057	0.675169	0.141345	4.77676	1.78e-06	8.83e-06
Hic1	119.532	1.19872	0.251132	4.77328	1.81e-06	8.97e-06
Dusp16	210.616	0.849543	0.178362	4.76302	1.91e-06	9.43e-06
Adrm1	908.96	0.58753	0.12336	4.76271	1.91e-06	9.43e-06
Ascc2	261.405	0.989344	0.207821	4.76055	1.93e-06	9.53e-06
St6galnac4	478.095	0.646246	0.13577	4.75986	1.94e-06	9.56e-06
Ctsl	1947.26	0.776002	0.163094	4.758	1.96e-06	9.65e-06
Vps53	862.886	0.507514	0.106676	4.7575	1.96e-06	9.67e-06
C1qc	542.915	1.02507	0.215489	4.75693	1.97e-06	9.69e-06
Ikzf4	2961.9	0.522163	0.10984	4.75385	2e-06	9.83e-06
Hook1	1320.59	0.664972	0.139885	4.75369	2e-06	9.83e-06
Ms4a6bl	49.4247	2.31143	0.486358	4.75253	2.01e-06	9.88e-06
Trir	792.894	0.519665	0.109355	4.75211	2.01e-06	9.9e-06
Vill	30.0488	2.21234	0.465679	4.75078	2.03e-06	9.96e-06
Itgb1	2275.19	0.653925	0.137659	4.75032	2.03e-06	9.97e-06
Lars1	1334.92	0.534759	0.112617	4.74846	2.05e-06	1.01e-05
Ppp1r15a	259.978	1.57783	0.332428	4.74639	2.07e-06	1.02e-05
Rtfdc1	816.707	0.681572	0.143598	4.74638	2.07e-06	1.02e-05
Tfec	9.21899	6.6499	1.40152	4.74479	2.09e-06	1.02e-05
Ptpn12	980.402	0.606683	0.128028	4.73869	2.15e-06	1.05e-05
Tspan18	35.2369	2.48873	0.525452	4.73636	2.18e-06	1.07e-05
Eif4enif1	861.312	0.544229	0.114912	4.73604	2.18e-06	1.07e-05
Gsap	43.871	2.22089	0.469289	4.73246	2.22e-06	1.08e-05
Slc17a6	332.229	1.01182	0.213905	4.73025	2.24e-06	1.09e-05
RGD1311946	204.618	0.942386	0.199223	4.73031	2.24e-06	1.09e-05
Abitram	231.935	0.837646	0.177082	4.73028	2.24e-06	1.09e-05
Sstr3	369.581	0.727467	0.153811	4.72963	2.25e-06	1.1e-05
N4bp2l2	504.593	0.664415	0.140503	4.72883	2.26e-06	1.1e-05
Marchf7	1389.22	0.494492	0.104584	4.72818	2.27e-06	1.1e-05
Ube2z	1579.25	0.437032	0.0925342	4.72293	2.32e-06	1.13e-05
Mmp3	26.9876	4.27169	0.905136	4.71939	2.37e-06	1.15e-05
Ptgfr	38.3909	2.54332	0.539409	4.71501	2.42e-06	1.17e-05
Mga	1380.78	0.569658	0.120857	4.7135	2.44e-06	1.18e-05
Wipf3	1938.57	0.791231	0.167879	4.71311	2.44e-06	1.18e-05
C1ql2	33.2261	2.45523	0.52112	4.71144	2.46e-06	1.19e-05
Prok2	32.2065	3.80943	0.808676	4.71069	2.47e-06	1.2e-05
Rpl12	2034.85	1.07208	0.227582	4.71073	2.47e-06	1.2e-05
Slc7a6os	447.318	0.638893	0.135795	4.70482	2.54e-06	1.23e-05
Dmp1	24.8764	2.96996	0.631468	4.70326	2.56e-06	1.24e-05
Cmya5	473.153	1.13892	0.242204	4.70232	2.57e-06	1.24e-05
Kcnk6	45.5795	1.87503	0.398806	4.70161	2.58e-06	1.25e-05
Pate4	13.4528	6.21391	1.32319	4.69616	2.65e-06	1.28e-05
Pkd1l2	18.1038	3.47887	0.741128	4.69402	2.68e-06	1.29e-05
Qsox2	421.881	0.64301	0.137067	4.6912	2.72e-06	1.31e-05
Fbxo30	372.68	0.747985	0.159484	4.69002	2.73e-06	1.32e-05
Gcnt4	197.148	1.08651	0.231689	4.68949	2.74e-06	1.32e-05
Wbp11	1125.3	0.514882	0.109841	4.68754	2.77e-06	1.33e-05
Entpd7	98.7759	1.30849	0.279157	4.68729	2.77e-06	1.33e-05
Faf2	950.521	0.54357	0.116056	4.68369	2.82e-06	1.36e-05
Zfp593	181.908	1.23898	0.264687	4.68092	2.86e-06	1.37e-05
Atl3	352.457	0.675161	0.144251	4.68045	2.86e-06	1.38e-05
Nfkb1	502.187	0.658335	0.140681	4.67964	2.87e-06	1.38e-05
Dhx15	2371.27	0.536593	0.114721	4.67736	2.91e-06	1.4e-05
Ide	937.15	0.527212	0.112726	4.67692	2.91e-06	1.4e-05
Pla2g15	386.741	0.735435	0.15731	4.67507	2.94e-06	1.41e-05
Bace1	2287.67	0.594794	0.127343	4.6708	3e-06	1.44e-05
Cpsf2	1230.87	0.61915	0.132611	4.66893	3.03e-06	1.45e-05
Clstn3	4464.9	0.459847	0.098504	4.66831	3.04e-06	1.45e-05
Arhgef7	2116.55	0.651311	0.139555	4.66707	3.06e-06	1.46e-05
Tes	204.822	1.21658	0.260703	4.66653	3.06e-06	1.46e-05
Hormad2	15.7683	6.44794	1.38202	4.66558	3.08e-06	1.47e-05
Wnt10a	160.496	1.52031	0.325908	4.66484	3.09e-06	1.48e-05
Zc3h13	1806.34	0.69912	0.149873	4.66474	3.09e-06	1.48e-05
Dgat1	330.888	0.813441	0.174502	4.66149	3.14e-06	1.5e-05
Map2k1	4499.34	0.539603	0.115771	4.66096	3.15e-06	1.5e-05
Gphn	867.196	1.21701	0.261388	4.65597	3.22e-06	1.54e-05
Smim3	254.683	0.85458	0.183654	4.65321	3.27e-06	1.56e-05
NEWGENE_619861	7140.88	0.478496	0.102946	4.64805	3.35e-06	1.59e-05
RGD1560212	1335.25	0.452663	0.0973963	4.64764	3.36e-06	1.59e-05
Cdt1	47.0085	2.75318	0.592457	4.64704	3.37e-06	1.6e-05
Peak1	752.778	0.830011	0.178648	4.64606	3.38e-06	1.6e-05
Sdcbp2	36.8957	2.41909	0.521248	4.64095	3.47e-06	1.64e-05
Pfkl	1554.57	0.51672	0.111377	4.63936	3.49e-06	1.65e-05
Slc4a1ap	805.052	0.553412	0.119425	4.63398	3.59e-06	1.69e-05
Arih1	2011.94	0.600931	0.12977	4.63073	3.64e-06	1.72e-05
Srp9	712.724	0.527249	0.113905	4.62887	3.68e-06	1.74e-05
Traf2	154.571	0.91616	0.197947	4.62832	3.69e-06	1.74e-05
Arpc2	3185.26	0.460444	0.099597	4.62307	3.78e-06	1.78e-05
Sh2d5	964.902	0.694772	0.150385	4.61996	3.84e-06	1.81e-05
Prss56	77.6258	6.25731	1.3564	4.61318	3.97e-06	1.86e-05
Bag2	156.224	1.04063	0.225604	4.61263	3.98e-06	1.87e-05
Hk2	227.668	1.3717	0.297384	4.61255	3.98e-06	1.87e-05
Ddx49	368.324	0.804084	0.174332	4.61236	3.98e-06	1.87e-05
Atp8a1	4509.18	0.657785	0.142724	4.60878	4.05e-06	1.9e-05
Rbm8a	571.132	0.582419	0.12637	4.60885	4.05e-06	1.9e-05
Tacc3	72.4341	1.47761	0.320738	4.6069	4.09e-06	1.92e-05
Prkar2a	480.658	0.782812	0.169975	4.60544	4.12e-06	1.93e-05
Mbd2	564.689	0.690541	0.150001	4.60357	4.15e-06	1.94e-05
Dync1li1	1250.33	0.510777	0.110962	4.60316	4.16e-06	1.95e-05
Pik3ca	2547.25	0.797016	0.173162	4.60271	4.17e-06	1.95e-05
Aprt	350.813	0.816906	0.177562	4.60069	4.21e-06	1.97e-05
Gatad2a	555.234	0.587079	0.127823	4.5929	4.37e-06	2.04e-05
Crbn	1167.59	0.557053	0.121332	4.59115	4.41e-06	2.05e-05
Iqgap2	611.47	0.873705	0.19042	4.5883	4.47e-06	2.08e-05
Dhx37	306.19	0.863566	0.188251	4.58731	4.49e-06	2.09e-05
Rpl14	2904.19	0.454208	0.099037	4.58625	4.51e-06	2.1e-05
Lyar	165.144	0.940934	0.205315	4.58287	4.59e-06	2.13e-05
Rgs7	2147.49	0.527795	0.115196	4.5817	4.61e-06	2.14e-05
Yae1	740.366	0.738892	0.161291	4.5811	4.63e-06	2.15e-05
Osgin1	20.3866	2.97672	0.649893	4.58032	4.64e-06	2.15e-05
Trim72	33.2234	2.3454	0.512237	4.57874	4.68e-06	2.17e-05
Tma16	107.01	1.20972	0.264345	4.57628	4.73e-06	2.19e-05
Snrpg	205.343	1.2811	0.280115	4.57348	4.8e-06	2.22e-05
Ppp1r3b	29.1081	2.11641	0.462925	4.57182	4.84e-06	2.23e-05
Rif1	570.007	0.676985	0.148081	4.57171	4.84e-06	2.23e-05
Maml2	310.989	1.09008	0.2386	4.56867	4.91e-06	2.27e-05
Usp13	850.05	0.754361	0.165148	4.56779	4.93e-06	2.27e-05
Psma4	1223.33	0.481345	0.105397	4.56698	4.95e-06	2.28e-05
Ago2	458.389	1.23949	0.271414	4.56678	4.95e-06	2.28e-05
Sugp1	729.995	0.607512	0.133057	4.56582	4.98e-06	2.29e-05
Rpl27	1680.18	0.496723	0.108822	4.56453	5.01e-06	2.31e-05
Nol12	129.733	1.35325	0.296555	4.56324	5.04e-06	2.32e-05
Ung	51.8646	1.53801	0.337084	4.56269	5.05e-06	2.32e-05
Dusp6	1205.14	1.0535	0.230904	4.56252	5.05e-06	2.32e-05
Rps17	2031.86	1.05957	0.232269	4.56181	5.07e-06	2.33e-05
Thop1	428.831	0.784658	0.172037	4.56098	5.09e-06	2.34e-05
Tvp23b	463.587	0.643425	0.141203	4.55675	5.2e-06	2.38e-05
Spcs3	2690.09	0.43671	0.095857	4.55585	5.22e-06	2.39e-05
Ptbp2	2265.5	0.599269	0.131587	4.55418	5.26e-06	2.41e-05
Fndc3a	1252.28	0.484115	0.106323	4.55325	5.28e-06	2.42e-05
Stk38l	404.862	0.703012	0.154417	4.55267	5.3e-06	2.42e-05
Spsb2	121.412	1.26462	0.277812	4.55208	5.31e-06	2.43e-05
Lmcd1	221.018	1.01316	0.222617	4.55115	5.34e-06	2.44e-05
Cinp	655.903	0.729858	0.160458	4.54858	5.4e-06	2.47e-05
Arhgap22	152.44	0.991698	0.218164	4.54566	5.48e-06	2.5e-05
Insyn2a	176.066	0.938662	0.206595	4.54348	5.53e-06	2.52e-05
Phc2	1004.92	0.480777	0.105828	4.54303	5.55e-06	2.53e-05
Ampd3	776.933	0.658462	0.145036	4.53998	5.63e-06	2.56e-05
Fam135a	919.598	0.679105	0.149633	4.53848	5.67e-06	2.58e-05
Relt	106.363	1.76968	0.390064	4.53688	5.71e-06	2.6e-05
Snrnp40	256.382	0.755843	0.166644	4.53568	5.74e-06	2.61e-05
Serping1	114.534	1.76571	0.389422	4.53418	5.78e-06	2.63e-05
Nol8	371.866	0.725061	0.159922	4.53384	5.79e-06	2.63e-05
Surf6	340.286	0.661488	0.14598	4.53136	5.86e-06	2.66e-05
Tnc	619.87	2.5931	0.572342	4.53068	5.88e-06	2.67e-05
Nkain1	278.843	0.713204	0.15751	4.52799	5.95e-06	2.7e-05
Smpd1	1321.92	0.469391	0.103745	4.52448	6.05e-06	2.75e-05
Kif3b	1741.96	0.581325	0.128503	4.52383	6.07e-06	2.75e-05
Slfn13	177.614	1.14674	0.253689	4.52024	6.18e-06	2.8e-05
Tsfm	339.506	0.732158	0.162018	4.51899	6.21e-06	2.81e-05
Fosl1	809.105	0.787068	0.174202	4.51813	6.24e-06	2.82e-05
Thg1l	163.809	0.97464	0.215726	4.51795	6.24e-06	2.83e-05
Ptprc	179.537	1.00602	0.2227	4.51739	6.26e-06	2.83e-05
Bcs1l	221.351	0.762004	0.16875	4.51558	6.31e-06	2.85e-05
Cpne1	510.482	1.17002	0.259152	4.51481	6.34e-06	2.86e-05
Narf	1258.49	0.636681	0.141054	4.51373	6.37e-06	2.87e-05
Rad54l2	515.924	0.613822	0.136027	4.51249	6.41e-06	2.89e-05
Naca	2540.85	0.38875	0.086178	4.51101	6.45e-06	2.91e-05
Rpl3	5441.3	0.414867	0.0919781	4.5105	6.47e-06	2.92e-05
Hgh1	223.488	0.852689	0.189059	4.51017	6.48e-06	2.92e-05
Rrs1	321.883	0.721525	0.160121	4.50611	6.6e-06	2.97e-05
RT1-M6-2	41.797	2.27116	0.504205	4.50444	6.65e-06	2.99e-05
Thrap3	3147.11	0.481646	0.106935	4.5041	6.67e-06	3e-05
Ddx19a	589.678	0.609215	0.13529	4.50303	6.7e-06	3.01e-05
Kif26b	131.97	1.16575	0.258984	4.50123	6.76e-06	3.04e-05
Sdc4	930.966	0.586343	0.130278	4.5007	6.77e-06	3.04e-05
Serac1	488.816	0.760868	0.169123	4.4989	6.83e-06	3.07e-05
Phf13	316.643	0.77466	0.172199	4.49862	6.84e-06	3.07e-05
Ccdc6	806.798	0.575984	0.128037	4.49859	6.84e-06	3.07e-05
Fam98a	740.457	0.691312	0.153714	4.49738	6.88e-06	3.09e-05
Lrrcc1	167.936	0.833536	0.185362	4.49681	6.9e-06	3.09e-05
Capzb	2912.77	0.411479	0.09151	4.49655	6.91e-06	3.1e-05
Psmb3	1010.34	0.560719	0.124756	4.49451	6.97e-06	3.12e-05
Plod3	445.269	0.746586	0.166145	4.49358	7e-06	3.14e-05
Maea	971.898	0.511134	0.113903	4.48745	7.21e-06	3.22e-05
Cops2	1982.56	0.502843	0.112122	4.48479	7.3e-06	3.26e-05
Faap100	230.509	0.819977	0.18293	4.48247	7.38e-06	3.29e-05
Prkar1b	8981.1	0.483696	0.107908	4.48249	7.38e-06	3.29e-05
Bend7	58.5301	1.5461	0.344947	4.48213	7.39e-06	3.3e-05
Nup50	1055.38	0.627993	0.140175	4.48007	7.46e-06	3.33e-05
Mphosph6	363.565	0.793597	0.177209	4.47832	7.52e-06	3.35e-05
Grik4	562.259	0.765669	0.170974	4.47827	7.52e-06	3.35e-05
Ifi27l2b	18.7148	2.71054	0.605705	4.47501	7.64e-06	3.4e-05
Eef1akmt4	33.0018	1.98229	0.443147	4.47322	7.71e-06	3.43e-05
Foxk2	1768.01	0.485419	0.108532	4.47258	7.73e-06	3.43e-05
Srp54a	902.663	0.601934	0.134599	4.47206	7.75e-06	3.44e-05
Tmem63c	832.368	0.56218	0.12571	4.47204	7.75e-06	3.44e-05
Cbln2	1496.01	1.07535	0.240472	4.47182	7.76e-06	3.44e-05
Tmem69	369.49	0.800662	0.179094	4.47063	7.8e-06	3.46e-05
Jagn1	447.792	0.604301	0.135203	4.46957	7.84e-06	3.48e-05
Acbd6	373.818	0.662524	0.148277	4.46814	7.89e-06	3.5e-05
Gcnt2	399.916	0.769686	0.172407	4.46435	8.03e-06	3.56e-05
RT1-CE1	24.8499	2.60226	0.58342	4.46036	8.18e-06	3.62e-05
Pafah1b2	2152.28	0.470703	0.105531	4.46033	8.18e-06	3.62e-05
Epc2	1098.63	0.592431	0.132841	4.45969	8.21e-06	3.63e-05
Serbp1	3909.13	0.508742	0.114082	4.45942	8.22e-06	3.63e-05
Nhp2	721.439	0.590855	0.132537	4.45805	8.27e-06	3.66e-05
Cd9	1405.79	0.646019	0.144919	4.45778	8.28e-06	3.66e-05
Dcun1d5	549.172	0.685891	0.153878	4.45737	8.3e-06	3.67e-05
Cherp	818.056	0.633211	0.142105	4.45594	8.35e-06	3.69e-05
Rab5a	2798.17	0.394721	0.0885855	4.45582	8.36e-06	3.69e-05
Sec61a2	1503.53	0.480348	0.107869	4.45307	8.47e-06	3.73e-05
Bves	15.5247	3.6387	0.818135	4.44755	8.69e-06	3.83e-05
Zfand5	2963.32	0.48145	0.108325	4.44449	8.81e-06	3.88e-05
Utp6	773.328	0.661267	0.148819	4.44344	8.85e-06	3.89e-05
Prag1	648.487	0.929548	0.209219	4.44293	8.87e-06	3.9e-05
Ubb	4461.15	0.601295	0.13544	4.43957	9.01e-06	3.96e-05
Cldn23	43.291	1.91095	0.430653	4.43734	9.11e-06	4e-05
Vat1	650.713	0.573796	0.129429	4.43328	9.28e-06	4.07e-05
Ednra	140.659	1.0593	0.238976	4.43267	9.31e-06	4.08e-05
Samd4b	591.592	0.550067	0.124141	4.43099	9.38e-06	4.11e-05
Adm	37.2257	2.61496	0.59026	4.43017	9.42e-06	4.12e-05
Rpl6	4052.17	0.422762	0.0955025	4.42671	9.57e-06	4.19e-05
Ap3s1	1133.01	0.625071	0.141215	4.42638	9.58e-06	4.19e-05
Noc3l	387.771	0.842	0.190316	4.42421	9.68e-06	4.23e-05
Arpc5	1758.38	0.561462	0.126914	4.42394	9.69e-06	4.23e-05
Ak6	219.428	1.52941	0.345878	4.42181	9.79e-06	4.27e-05
Il17rb	24.4397	2.93247	0.663278	4.42119	9.82e-06	4.28e-05
Exoc5	1864.88	0.518103	0.117192	4.42097	9.83e-06	4.29e-05
Snrpc	360.692	0.813597	0.184036	4.42086	9.83e-06	4.29e-05
Fyn	2235.31	0.562042	0.12717	4.4196	9.89e-06	4.31e-05
Gas8	200.819	0.940224	0.212777	4.41882	9.92e-06	4.33e-05
Slc35b1	691.056	0.550595	0.124635	4.41765	9.98e-06	4.35e-05
Hdac2	1348.59	0.459374	0.104	4.41706	1e-05	4.36e-05
Cct2	1978.94	0.582438	0.131965	4.41357	1.02e-05	4.43e-05
Ctsa	2140.52	0.488084	0.1106	4.41306	1.02e-05	4.44e-05
Pus7	236.532	0.970243	0.21987	4.4128	1.02e-05	4.44e-05
Hnrnpdl	2358.14	0.407222	0.0923415	4.40996	1.03e-05	4.49e-05
Top1	2227.19	0.649624	0.147322	4.40955	1.04e-05	4.5e-05
Abhd13	743.169	0.539421	0.122332	4.40949	1.04e-05	4.5e-05
Ece1	1285.76	0.982284	0.222788	4.40905	1.04e-05	4.51e-05
Higd1a	1208.9	0.50266	0.11405	4.40736	1.05e-05	4.54e-05
Tle3	1001.83	0.587574	0.13333	4.40692	1.05e-05	4.55e-05
Ckap4	413.01	0.796453	0.180795	4.40529	1.06e-05	4.58e-05
Ppp4r2	2254.73	0.49459	0.112299	4.40424	1.06e-05	4.6e-05
Taf4b	185.434	0.990964	0.225149	4.40137	1.08e-05	4.66e-05
Trib3	16.7664	3.56274	0.809631	4.40045	1.08e-05	4.68e-05
Sik2	1738.47	0.533466	0.121322	4.39711	1.1e-05	4.74e-05
Ube4b	1931.16	0.448082	0.101909	4.39688	1.1e-05	4.75e-05
Plrg1	521.508	0.72448	0.164927	4.39272	1.12e-05	4.83e-05
Myo1c	580.637	0.711306	0.162092	4.3883	1.14e-05	4.92e-05
Mapk7	188.081	1.03489	0.236307	4.37944	1.19e-05	5.12e-05
Mtmr11	214.428	0.909199	0.207781	4.37575	1.21e-05	5.2e-05
Tfpi	663.71	0.636286	0.145418	4.37556	1.21e-05	5.2e-05
Alkbh5	399.317	0.790604	0.180992	4.36817	1.25e-05	5.37e-05
Sqle	1216.86	0.727626	0.166574	4.36818	1.25e-05	5.37e-05
Atp8b4	14.0016	4.7785	1.09464	4.36538	1.27e-05	5.44e-05
Ado	975.992	0.626875	0.143861	4.3575	1.32e-05	5.63e-05
Rnmt	889.389	0.544166	0.124984	4.3539	1.34e-05	5.71e-05
Vps35	3482.6	0.53468	0.122805	4.3539	1.34e-05	5.71e-05
Hdac3	985.326	0.502908	0.115511	4.35377	1.34e-05	5.72e-05
Hspbp1	674.123	0.537163	0.123408	4.35276	1.34e-05	5.74e-05
Ecpas	2676.37	0.492004	0.113039	4.3525	1.35e-05	5.74e-05
Stag1	627.807	0.543547	0.124903	4.35174	1.35e-05	5.76e-05
Olfml2b	168.408	1.00697	0.231542	4.34896	1.37e-05	5.83e-05
Nol10	386.845	0.654679	0.150622	4.34651	1.38e-05	5.89e-05
Klf5	275.99	1.17641	0.270737	4.3452	1.39e-05	5.93e-05
Iffo1	1395.93	0.717274	0.165359	4.33768	1.44e-05	6.12e-05
Mepe	97.1031	2.30281	0.53098	4.33691	1.45e-05	6.14e-05
Ninj1	222.62	0.832464	0.191963	4.33658	1.45e-05	6.14e-05
Palmd	524.57	0.954862	0.22026	4.33516	1.46e-05	6.18e-05
Zmynd8	2278.29	0.477829	0.110223	4.33513	1.46e-05	6.18e-05
Rbp1	64.2291	1.94071	0.448097	4.331	1.48e-05	6.29e-05
Diras2	6657.31	0.752634	0.173807	4.33028	1.49e-05	6.31e-05
Pcbp1	2182.24	0.432159	0.0998157	4.32957	1.49e-05	6.33e-05
Taf1d	311.82	0.728914	0.168406	4.32832	1.5e-05	6.36e-05
Rfk	1108.58	0.905302	0.209173	4.32801	1.5e-05	6.37e-05
Lyz2	930.195	0.844968	0.195259	4.32743	1.51e-05	6.38e-05
Avl9	1812.69	0.437643	0.101244	4.32264	1.54e-05	6.52e-05
Ltv1	368.433	0.694771	0.160765	4.32167	1.55e-05	6.54e-05
Ier5l	129.044	1.19333	0.276177	4.3209	1.55e-05	6.56e-05
Coro1b	1024.65	0.471035	0.109021	4.3206	1.56e-05	6.57e-05
Trim28	1573.93	0.483867	0.11215	4.31445	1.6e-05	6.75e-05
Rpl22	1006.72	1.0682	0.247681	4.31283	1.61e-05	6.79e-05
Noc4l	218.725	0.798995	0.185268	4.31264	1.61e-05	6.79e-05
Atf5	644.31	0.751298	0.174228	4.31214	1.62e-05	6.81e-05
Pwp1	292.079	0.71246	0.16525	4.31139	1.62e-05	6.83e-05
PCOLCE2	40.0157	2.35993	0.547417	4.31102	1.63e-05	6.84e-05
Fchsd1	94.5704	1.51292	0.350983	4.31052	1.63e-05	6.85e-05
Hcar2	33.1155	2.76798	0.642202	4.31013	1.63e-05	6.86e-05
Tmx4	5158.48	0.371076	0.0861571	4.30697	1.66e-05	6.95e-05
Fyttd1	3318.16	0.481211	0.111755	4.30596	1.66e-05	6.98e-05
Smagp	139.93	1.0397	0.241466	4.30578	1.66e-05	6.98e-05
Lman2	1010.34	0.524623	0.121867	4.30487	1.67e-05	7.01e-05
Drg1	755.802	0.594679	0.138225	4.30225	1.69e-05	7.09e-05
S1pr2	143.07	1.38775	0.322608	4.30167	1.7e-05	7.1e-05
Ptdss1	1235.89	0.482311	0.11216	4.30019	1.71e-05	7.15e-05
Gpat4	1371.09	0.555153	0.129115	4.29968	1.71e-05	7.16e-05
Dgcr8	828.829	0.738239	0.171715	4.29921	1.71e-05	7.17e-05
Shmt1	60.6215	1.56394	0.363995	4.29661	1.73e-05	7.26e-05
Slc25a30	270.08	0.676727	0.157515	4.29627	1.74e-05	7.26e-05
Frrs1	58.9508	1.70649	0.397759	4.29027	1.78e-05	7.45e-05
Gpatch11	372.573	0.697512	0.162578	4.29033	1.78e-05	7.45e-05
RGD1564664	367.96	0.670949	0.156393	4.29014	1.79e-05	7.45e-05
Il6r	448.548	1.05556	0.246164	4.28801	1.8e-05	7.52e-05
Mex3c	982.019	0.628018	0.146461	4.28794	1.8e-05	7.52e-05
Aldh1a3	28.8547	4.40683	1.02789	4.28727	1.81e-05	7.54e-05
Izumo1r	11.3465	5.96428	1.39151	4.28621	1.82e-05	7.56e-05
Asah1	1039.79	0.550438	0.128475	4.28441	1.83e-05	7.62e-05
Polr1d	807.087	0.578809	0.135137	4.28311	1.84e-05	7.66e-05
Apba2	2133.07	0.515642	0.120392	4.28302	1.84e-05	7.66e-05
Etnk1	6048.73	0.381867	0.0891972	4.28116	1.86e-05	7.72e-05
Hcls1	103.322	1.12322	0.262407	4.28046	1.87e-05	7.74e-05
Nectin4	23.4181	2.75655	0.644531	4.27684	1.9e-05	7.86e-05
Zfp131	834.537	0.792225	0.185256	4.27638	1.9e-05	7.87e-05
Mios	356.143	0.620085	0.145007	4.27623	1.9e-05	7.88e-05
Il1b	23.1841	4.47677	1.04753	4.27364	1.92e-05	7.96e-05
Rps5	1573.56	0.497961	0.116607	4.27042	1.95e-05	8.07e-05
Fcf1	345.787	0.687673	0.161146	4.2674	1.98e-05	8.18e-05
Yif1a	202.978	0.769876	0.180426	4.26698	1.98e-05	8.19e-05
Zfp518b	361.525	0.635986	0.149208	4.26242	2.02e-05	8.36e-05
Nelfe	393.322	0.626294	0.147031	4.25961	2.05e-05	8.45e-05
Plekhg6	62.593	1.40355	0.329576	4.25866	2.06e-05	8.48e-05
Sec16b	104.694	1.46055	0.343384	4.25338	2.11e-05	8.68e-05
Casp8ap2	443.235	0.707415	0.166447	4.25009	2.14e-05	8.8e-05
Rasgrf1	5599.1	0.583225	0.137292	4.24806	2.16e-05	8.87e-05
Dnttip2	552.487	0.675027	0.158915	4.24771	2.16e-05	8.88e-05
Slc7a6	746.426	0.518682	0.122126	4.24712	2.17e-05	8.9e-05
Sec11a	384.949	0.630017	0.148422	4.24475	2.19e-05	8.99e-05
Rack1	3149.71	0.461893	0.108832	4.24409	2.19e-05	9.01e-05
Khsrp	970.276	0.523755	0.123423	4.24358	2.2e-05	9.03e-05
Rtca	495.597	0.545167	0.128549	4.24091	2.23e-05	9.13e-05
Syt10	146.132	1.23742	0.291968	4.23822	2.25e-05	9.23e-05
Apex1	606.957	0.634986	0.149873	4.23684	2.27e-05	9.28e-05
Mettl9	1248.46	0.491988	0.116132	4.23644	2.27e-05	9.29e-05
Klhl2	4016.91	0.460965	0.108869	4.23412	2.29e-05	9.38e-05
Kctd6	228.743	0.731379	0.172748	4.23379	2.3e-05	9.39e-05
Avp	10.1884	5.80916	1.37237	4.23293	2.31e-05	9.43e-05
Pspn	222.757	0.843833	0.199418	4.23148	2.32e-05	9.49e-05
Ppm1g	830.625	0.502828	0.118861	4.2304	2.33e-05	9.53e-05
Mfap1a	967.599	0.618342	0.146251	4.22796	2.36e-05	9.62e-05
Atp6v0a1	6625.24	0.398145	0.0941936	4.22688	2.37e-05	9.67e-05
RGD1307182	12.4516	6.09972	1.44312	4.22677	2.37e-05	9.67e-05
Car10	1461.56	0.570027	0.134912	4.22517	2.39e-05	9.73e-05
Pygo2	577.864	0.556455	0.131741	4.22385	2.4e-05	9.79e-05
Hdx	99.959	1.11472	0.263952	4.22319	2.41e-05	9.81e-05
Slc41a2	861.668	0.791623	0.187452	4.22306	2.41e-05	9.82e-05
Ift74	283.988	0.727235	0.172222	4.22266	2.41e-05	9.83e-05
Zfp410	448.052	0.658752	0.156108	4.21984	2.44e-05	9.95e-05
Cdk11b	1767.08	0.446746	0.105882	4.21927	2.45e-05	9.97e-05
Ap2a1	2831.54	0.393511	0.0932788	4.21865	2.46e-05	9.99e-05
AABR07003537.1	79.8804	1.27646	0.302591	4.21844	2.46e-05	0.0001
B4galt1	82.8286	1.41611	0.33575	4.21776	2.47e-05	0.000100268
F3	491.868	0.71586	0.169736	4.2175	2.47e-05	0.000100352
Wars1	1225.33	0.668801	0.158711	4.21396	2.51e-05	0.000101796
Rxfp2	19.2116	2.42942	0.576746	4.21228	2.53e-05	0.000102512
Usp38	575.525	0.577229	0.137111	4.20993	2.55e-05	0.000103513
Ier2	297.127	1.26608	0.300873	4.20803	2.58e-05	0.000104267
Sulf1	535.635	1.26176	0.299858	4.20785	2.58e-05	0.00010432
Itsn1	3289.63	0.532323	0.126522	4.20736	2.58e-05	0.000104463
Cep192	912.569	0.483898	0.115018	4.20714	2.59e-05	0.000104529
Eps15l1	674.944	0.54583	0.129786	4.20562	2.6e-05	0.000105178
Usp14	2835.52	0.501462	0.119264	4.20465	2.61e-05	0.000105598
Cdc37	1829.16	0.398436	0.0947864	4.20352	2.63e-05	0.000106099
Tmem87a	640.578	0.515099	0.122577	4.20225	2.64e-05	0.000106634
Scamp2	349.496	0.611804	0.145592	4.20217	2.64e-05	0.00010664
Mlx	646.792	0.583424	0.138942	4.19906	2.68e-05	0.000108055
RGD1359634	218.841	0.73944	0.176145	4.19791	2.69e-05	0.000108574
Nop9	191.364	0.893872	0.212991	4.19676	2.71e-05	0.000109099
Ubxn2a	620.438	1.18931	0.283476	4.19544	2.72e-05	0.000109666
Ssr3	1998.46	0.409325	0.0975861	4.19451	2.73e-05	0.00010997
Relb	54.1916	1.75405	0.41823	4.194	2.74e-05	0.000110054
Orc6	74.4164	1.2174	0.29028	4.19389	2.74e-05	0.000110054
Hspa14	339.115	0.610352	0.145532	4.19393	2.74e-05	0.000110054
Arfrp1	854.497	0.498675	0.118904	4.19393	2.74e-05	0.000110054
Rpl24	2643.57	0.370778	0.0884119	4.19376	2.74e-05	0.000110072
Cul5	697.954	0.549526	0.131137	4.19047	2.78e-05	0.000111633
Chst1	2827.8	0.548763	0.131004	4.18891	2.8e-05	0.000112307
Fam118b	269.583	0.748077	0.178672	4.18687	2.83e-05	0.000113169
Vamp4	320.487	0.604439	0.144366	4.18686	2.83e-05	0.000113169
Hnrnpa3	7968.26	0.448646	0.107164	4.18652	2.83e-05	0.000113303
Naa25	717.993	0.486202	0.116143	4.18625	2.84e-05	0.00011341
Inpp4b	109.342	1.12378	0.268601	4.18383	2.87e-05	0.000114525
Tomm40	842.514	0.477339	0.114105	4.18333	2.87e-05	0.000114749
Yme1l1	2082.7	0.430105	0.102853	4.18173	2.89e-05	0.000115463
Zfyve28	666.473	0.473455	0.113242	4.18089	2.9e-05	0.000115856
Ankle2	2135.23	0.440675	0.105409	4.18061	2.91e-05	0.000115965
Ifitm1	25.5273	2.70588	0.647521	4.17882	2.93e-05	0.000116785
Lrfn1	633.342	0.608872	0.14573	4.17808	2.94e-05	0.000117102
B3gnt5	67.6103	4.75817	1.13987	4.17432	2.99e-05	0.000118932
Tapbp	130.729	0.980072	0.234791	4.17423	2.99e-05	0.000118932
Mnt	757.932	0.51142	0.122564	4.17269	3.01e-05	0.000119706
Hmgb1	287.479	0.708359	0.169809	4.1715	3.03e-05	0.000120265
Papolg	463.153	0.554266	0.13289	4.17087	3.03e-05	0.000120566
Eif4a3	746.917	0.457284	0.109652	4.17032	3.04e-05	0.000120793
Idi1	791.821	1.00834	0.24187	4.16894	3.06e-05	0.00012139
Atxn10	2144.75	0.36647	0.0879039	4.16899	3.06e-05	0.00012139
Aff1	322.085	0.83482	0.200361	4.16657	3.09e-05	0.000122524
Sf3b3	1160.17	0.609241	0.14622	4.16661	3.09e-05	0.000122524
Hax1	706.062	0.460827	0.110604	4.16646	3.09e-05	0.000122547
Naa15	1937.67	0.500492	0.120185	4.16434	3.12e-05	0.000123622
Taf12	277.063	0.804767	0.193305	4.1632	3.14e-05	0.00012421
Vax2	13.7487	4.2968	1.03223	4.16265	3.15e-05	0.000124475
Fkbp10	164.68	0.904068	0.217243	4.16155	3.16e-05	0.000125003
Coro1c	1639.04	0.430959	0.103636	4.15838	3.21e-05	0.000126613
Polr1b	345.041	0.904728	0.217665	4.15651	3.23e-05	0.000127546
Rbm28	479.414	0.669163	0.161017	4.15584	3.24e-05	0.000127885
Kat7	1500.82	0.421777	0.101509	4.15507	3.25e-05	0.000128214
Efnb1	243.581	0.694942	0.167256	4.15495	3.25e-05	0.000128245
Ccdc115	520.09	0.58822	0.141622	4.15346	3.27e-05	0.000129012
Trim65	224.166	0.947607	0.22818	4.15288	3.28e-05	0.000129266
mrpl9	442.645	0.539833	0.130024	4.15178	3.3e-05	0.000129782
Epcam	25.5517	2.47557	0.596786	4.14817	3.35e-05	0.000131736
Eef1g	4540.36	0.39729	0.0957792	4.14797	3.35e-05	0.000131814
Arhgap26	1163.92	0.796106	0.192061	4.14507	3.4e-05	0.000133423
Lsm5	98.3905	1.44167	0.347823	4.14486	3.4e-05	0.000133511
Taf15	1917.2	0.523736	0.126414	4.14303	3.43e-05	0.000134505
Mab21l3	6.69704	6.18602	1.49318	4.14284	3.43e-05	0.00013458
Stard4	566.703	0.921046	0.222419	4.14104	3.46e-05	0.000135568
Slc35f4	167.028	0.91487	0.22102	4.13931	3.48e-05	0.000136552
Enpep	154.989	0.808306	0.195278	4.13925	3.48e-05	0.000136552
Ubqln1	3946.73	0.370847	0.0896435	4.13692	3.52e-05	0.000137836
Hexb	2457.84	0.484951	0.11724	4.13641	3.53e-05	0.000138064
Pcdh15	427.576	0.826388	0.19998	4.13235	3.59e-05	0.000140412
Nat10	359.732	0.611296	0.148062	4.12866	3.65e-05	0.000142566
Lifr	655.891	0.747073	0.180953	4.12854	3.65e-05	0.000142605
Snx6	756.532	0.524968	0.127248	4.12555	3.7e-05	0.000144425
Myo19	109.433	0.982514	0.238556	4.11858	3.81e-05	0.000148785
Samd8	2202.2	1.04749	0.254516	4.11563	3.86e-05	0.000150618
Osgin2	321.503	0.665009	0.161604	4.11506	3.87e-05	0.00015095
Cdh17	6.71229	6.18902	1.50537	4.11129	3.93e-05	0.00015331
Glmp	324.537	0.666866	0.162375	4.10694	4.01e-05	0.000156098
Gmnn	64.2498	1.28404	0.312698	4.10632	4.02e-05	0.000156478
Prr13	519.97	0.591427	0.144036	4.10612	4.02e-05	0.000156569
Cd164l2	41.9144	1.79017	0.436119	4.10478	4.05e-05	0.000157396
Cthrc1	19.9329	3.0699	0.747904	4.10468	4.05e-05	0.000157422
Psma6	1230.2	0.448538	0.109321	4.10293	4.08e-05	0.00015857
Vegfa	2556.66	0.539247	0.131491	4.10103	4.11e-05	0.000159792
Tsen15	255.334	0.781299	0.190782	4.09524	4.22e-05	0.00016366
Tpr	2239.1	0.482323	0.117811	4.09403	4.24e-05	0.000164427
Mrpl45	570.44	0.51953	0.126907	4.09378	4.24e-05	0.000164562
Raly	1362.94	0.470907	0.115052	4.09301	4.26e-05	0.000165066
Hm13	1064.51	0.445969	0.108997	4.09157	4.28e-05	0.00016596
Rdx	1861.59	0.522315	0.127672	4.09108	4.29e-05	0.000166222
Kpna2	386.794	0.873085	0.213475	4.08987	4.32e-05	0.000167047
Slc39a7	639.302	0.779776	0.190805	4.08677	4.37e-05	0.000169106
Slc30a1	447.079	0.540411	0.132427	4.08081	4.49e-05	0.000173272
Sdad1	462.783	0.728059	0.178568	4.07721	4.56e-05	0.000175783
Cyba	65.7615	1.32387	0.324817	4.07575	4.59e-05	0.000176795
Polr3a	587.288	0.521315	0.12791	4.07565	4.59e-05	0.000176822
Adcy8	404.987	1.13791	0.279204	4.07555	4.59e-05	0.000176853
Znhit6	477.262	0.681495	0.16726	4.07448	4.61e-05	0.000177622
Phactr4	261.967	0.690775	0.169556	4.07401	4.62e-05	0.000177927
Il17ra	579.331	0.60441	0.148393	4.07304	4.64e-05	0.000178532
Tor3a	206.598	0.899135	0.22077	4.07272	4.65e-05	0.000178726
Rpl10a	1645.94	0.454021	0.111548	4.07019	4.7e-05	0.000180581
Plekha1	2274.83	0.418926	0.102954	4.06907	4.72e-05	0.000181357
Rps20	1293.33	1.9584	0.481355	4.06851	4.73e-05	0.000181741
Mob4	1718.56	0.477694	0.117417	4.06834	4.73e-05	0.000181823
Erfe	13.966	3.24055	0.796581	4.06807	4.74e-05	0.000181984
Grsf1	1959.06	0.611276	0.150407	4.06415	4.82e-05	0.000184926
Timm17a	583.155	0.565851	0.139294	4.06227	4.86e-05	0.000186322
Nup98	1060	0.47556	0.117111	4.06077	4.89e-05	0.000187417
Atp8b1	14.627	4.05596	0.999129	4.0595	4.92e-05	0.00018834
Suz12	1133.42	0.475009	0.117014	4.05944	4.92e-05	0.00018834
Pik3ap1	157.837	1.09356	0.269393	4.05934	4.92e-05	0.000188369
Gdap2	528.36	0.542277	0.133607	4.05875	4.93e-05	0.000188746
Tgm1	19.4876	2.56064	0.630964	4.0583	4.94e-05	0.000189063
Eloa	720.488	0.595705	0.146976	4.05307	5.06e-05	0.00019329
Wnt9b	48.5338	2.39561	0.591334	4.05119	5.1e-05	0.000194674
Mcmbp	442.606	0.700019	0.172851	4.04984	5.13e-05	0.000195663
Fcgbp	60.6514	1.31053	0.323633	4.04942	5.13e-05	0.00019596
Paf1	1165.37	0.479414	0.118396	4.04923	5.14e-05	0.000196062
Tnfrsf26	33.226	1.89902	0.469065	4.04853	5.15e-05	0.000196519
Nfx1	1635.1	0.555857	0.1373	4.0485	5.15e-05	0.000196519
Ubap1	791.76	0.542417	0.133978	4.04854	5.15e-05	0.000196519
Phf5a	235.768	0.701829	0.173557	4.0438	5.26e-05	0.00020029
Dapk3	505.084	0.637413	0.157734	4.04105	5.32e-05	0.000202492
Shisa5	647.948	0.600236	0.148569	4.04012	5.34e-05	0.000203192
Clic6	6.43387	6.1306	1.51775	4.03927	5.36e-05	0.000203823
Qpct	90.2544	1.64553	0.407377	4.03932	5.36e-05	0.000203823
Afg3l1	424.743	0.617138	0.152825	4.03821	5.39e-05	0.000204689
Selenoi	1346.93	0.544921	0.13497	4.03734	5.41e-05	0.00020539
Spry1	131.535	1.09332	0.270895	4.03594	5.44e-05	0.000206453
Ppp4r3a	1074.84	0.491327	0.121743	4.03577	5.44e-05	0.000206556
Rrn3	1002.7	0.55908	0.138558	4.03498	5.46e-05	0.000207198
Vav3	174.839	1.11425	0.276293	4.03288	5.51e-05	0.000209003
Jrk	216.845	0.8435	0.209194	4.03214	5.53e-05	0.000209601
Pds5a	777.11	0.513019	0.127243	4.03179	5.54e-05	0.000209856
Numbl	1407.5	0.545028	0.135231	4.03036	5.57e-05	0.000210921
Kdm1a	1063.38	0.532285	0.132137	4.02828	5.62e-05	0.000212682
Zranb3	192.049	0.846623	0.210435	4.0232	5.74e-05	0.00021709
Usp1	450.88	0.586954	0.145909	4.02274	5.75e-05	0.000217444
Snd1	1327.85	0.482081	0.11984	4.02269	5.75e-05	0.000217444
Ralb	497.72	0.643001	0.159866	4.02213	5.77e-05	0.000217905
Efemp2	152.744	1.04576	0.260325	4.01712	5.89e-05	0.000222236
Dis3	381.901	0.694556	0.172983	4.01516	5.94e-05	0.000223918
Dnaja3	1141.3	0.430325	0.107246	4.01249	6.01e-05	0.000226344
Arfgap3	358.114	0.661709	0.164923	4.01224	6.01e-05	0.000226529
Tfdp1	917.322	0.559794	0.139579	4.01058	6.06e-05	0.000227941
Xab2	490.166	0.527841	0.131644	4.0096	6.08e-05	0.000228769
Ccr7	17.0663	3.5659	0.890093	4.00622	6.17e-05	0.00023189
Otud4	540.166	0.50709	0.126574	4.00627	6.17e-05	0.00023189
Cfap300	63.6538	1.46237	0.365084	4.00556	6.19e-05	0.000232469
Slit3	744.624	0.775594	0.193632	4.0055	6.19e-05	0.000232475
Dbr1	197.176	0.715619	0.178674	4.00517	6.2e-05	0.000232733
Plk4	60.1246	1.36948	0.341956	4.00484	6.21e-05	0.000232995
Trmt10c	399.844	0.684515	0.170957	4.00401	6.23e-05	0.000233755
Myo1b	792.851	0.802569	0.200458	4.00368	6.24e-05	0.000234021
Snrpd3	355.793	0.623581	0.156001	3.99729	6.41e-05	0.000239921
Kcnn3	136.792	1.43695	0.359614	3.99581	6.45e-05	0.000241302
Scaf11	955.933	0.45896	0.114947	3.99278	6.53e-05	0.000244151
Ccdc88a	1987.02	0.419862	0.10522	3.99033	6.6e-05	0.000246563
Kif11	33.9491	2.58316	0.647508	3.9894	6.62e-05	0.000247469
Tead1	138.004	1.02343	0.256601	3.98839	6.65e-05	0.000248386
Nbn	530.104	0.536009	0.134415	3.98772	6.67e-05	0.000249031
Bub3	362.136	0.647179	0.162355	3.98619	6.71e-05	0.000250574
Rpl19	5088.56	0.40822	0.102541	3.98105	6.86e-05	0.000255789
Psmc3	2097.33	0.403902	0.101547	3.97749	6.96e-05	0.000259513
Klrk1	10.4762	4.93167	1.24001	3.97711	6.98e-05	0.000259855
Iws1	561.576	0.550688	0.138481	3.97664	6.99e-05	0.000260308
Plk3	136.623	1.05039	0.26421	3.97559	7.02e-05	0.000261384
Mospd1	159.476	1.48083	0.372489	3.9755	7.02e-05	0.000261418
Yipf5	818.296	0.524199	0.131887	3.97462	7.05e-05	0.000262319
Pdia6	2132.24	0.439302	0.110544	3.97399	7.07e-05	0.00026288
Sox5	284.854	0.856424	0.215574	3.97276	7.1e-05	0.000264103
Ggt6	137.116	1.04389	0.262792	3.97232	7.12e-05	0.000264516
Mfsd1	1201.29	0.476137	0.119893	3.97134	7.15e-05	0.00026554
Tdg	798.194	0.55969	0.140952	3.97077	7.16e-05	0.000266107
Rab23	947.056	0.599092	0.150973	3.9682	7.24e-05	0.000268783
Wdr81	547.838	0.525793	0.132568	3.96623	7.3e-05	0.000270666
Hjurp	50.6906	1.64298	0.414292	3.96574	7.32e-05	0.000271148
Strn3	1526.17	0.454162	0.114653	3.96118	7.46e-05	0.000276167
Cenpi	48.2232	1.88444	0.475953	3.95931	7.52e-05	0.000278196
P2ry6	83.6356	1.27482	0.322172	3.95694	7.59e-05	0.000280824
Rasa1	2122.61	0.820835	0.207591	3.95409	7.68e-05	0.0002839
Armcx4	1479.86	0.480937	0.121707	3.95158	7.76e-05	0.000286667
Gpr176	296.641	0.893722	0.226192	3.95117	7.78e-05	0.000287085
Tln1	1177.26	0.474438	0.120135	3.94921	7.84e-05	0.000289295
Ak2	236.473	0.734995	0.186123	3.94898	7.85e-05	0.000289499
Usp39	416.127	0.603454	0.15287	3.94751	7.9e-05	0.000291135
Vcp	5071.87	0.416731	0.105635	3.945	7.98e-05	0.000294053
Recql4	36.6479	1.51607	0.384452	3.94347	8.03e-05	0.000295858
Ext1	702.168	0.546501	0.138639	3.9419	8.08e-05	0.000297654
Htr5a	129.605	0.854872	0.216887	3.94154	8.1e-05	0.000298014
Rrp7a	1447.98	0.500262	0.126926	3.94136	8.1e-05	0.000298088
Rpl18a	3258.27	0.415786	0.105493	3.94138	8.1e-05	0.000298088
Abi1	2393.01	0.420178	0.106621	3.94085	8.12e-05	0.000298574
Ndufa10l1	1339.95	0.906655	0.230133	3.9397	8.16e-05	0.000299935
Phax	574.647	0.5158	0.131002	3.93735	8.24e-05	0.000302652
Ms4a6a	68.9148	1.23151	0.312883	3.93601	8.28e-05	0.000304189
Myo1a	14.0222	3.48735	0.886045	3.93586	8.29e-05	0.0003043
Eif1ad	476.021	0.57251	0.145465	3.93573	8.29e-05	0.000304378
Ptbp3	588.654	0.482926	0.122816	3.93212	8.42e-05	0.000308679
Sh3rf3	690.693	0.605036	0.153902	3.93132	8.45e-05	0.00030963
Serpinf1	60.8635	1.57328	0.400306	3.93019	8.49e-05	0.000311003
Col4a2	1691.02	0.910483	0.231756	3.92862	8.54e-05	0.00031278
Pdlim7	542.041	0.665931	0.169607	3.92631	8.63e-05	0.000315339
Brf1	369.197	0.59553	0.151711	3.92542	8.66e-05	0.000316344
Tmem167b	894.44	0.988117	0.251748	3.92502	8.67e-05	0.000316655
Pspc1	628.545	0.61393	0.156415	3.925	8.67e-05	0.000316655
Rrp1	726.018	0.533014	0.135901	3.92208	8.78e-05	0.000320352
Fgfbp1	5.78219	5.97628	1.52386	3.9218	8.79e-05	0.000320637
Polr1a	628.287	0.615762	0.157027	3.92137	8.8e-05	0.000321055
Cmip	2375.91	0.431063	0.109984	3.91931	8.88e-05	0.000323721
Zmynd19	349.906	0.612618	0.156426	3.91634	8.99e-05	0.000327326
Ocstamp	7.22132	6.29998	1.60925	3.91485	9.05e-05	0.000329269
Pitpna	4647.56	0.369953	0.0945113	3.91438	9.06e-05	0.000329824
Pnrc2	1385.54	0.97678	0.249579	3.91371	9.09e-05	0.000330659
Ncoa4	1121.9	1.02578	0.262392	3.90932	9.26e-05	0.000336549
Mosmo	1730.03	0.455496	0.116522	3.90908	9.26e-05	0.000336794
Cenpu	20.0336	2.73565	0.69994	3.9084	9.29e-05	0.000337579
Morc2	1485.02	0.577429	0.147763	3.9078	9.31e-05	0.000338239
Clta	2055.64	0.375457	0.0960943	3.90717	9.34e-05	0.000339038
Orc2	538.047	0.501315	0.12832	3.90677	9.35e-05	0.000339521
Erp44	724.742	0.46421	0.118881	3.90481	9.43e-05	0.00034219
Pole3	308.632	1.18702	0.304068	3.90379	9.47e-05	0.000343553
Bzw1	4423.23	0.475004	0.121743	3.90169	9.55e-05	0.000346459
Epc1	766.18	0.489825	0.125544	3.90162	9.55e-05	0.000346468
Adam19	482.981	0.728771	0.186898	3.89929	9.65e-05	0.000349729
Fbxo17	23.7404	1.95871	0.502451	3.89831	9.69e-05	0.00035107
Slc4a2	514.965	0.558076	0.143179	3.89774	9.71e-05	0.000351626
Exo5	105.404	0.922144	0.236964	3.8915	9.96e-05	0.000360336
Cgm4	5.77064	5.97371	1.53559	3.89017	0.000100174	0.000362133
Tex10	301.465	0.577605	0.1485	3.88958	0.000100416	0.000362828
Susd5	130.97	1.22771	0.315751	3.88824	0.000100974	0.000364659
Ercc4	513.61	0.564737	0.145311	3.88639	0.000101746	0.000367169
Ctu2	141.235	0.881522	0.226843	3.88605	0.000101888	0.000367586
Cd274	65.5521	1.34919	0.347229	3.88559	0.000102084	0.000368201
Mtbp	23.6228	2.17967	0.561074	3.88481	0.00010241	0.000369284
Prp2l1	964.289	0.496271	0.127824	3.88247	0.000103402	0.00037259
Gpr84	65.402	1.15785	0.298384	3.8804	0.000104285	0.000375576
Dcaf1	905.401	0.467905	0.12061	3.87948	0.000104679	0.000376801
Bfar	546.528	0.491533	0.126704	3.8794	0.000104716	0.000376842
Irf2bpl	625.338	0.601634	0.155221	3.87598	0.000106195	0.000381876
Lingo2	429.949	0.935967	0.241505	3.87556	0.000106379	0.000382345
Bdkrb2	28.8227	2.26017	0.58327	3.875	0.000106625	0.00038294
Slbp	415.104	0.574674	0.148381	3.87297	0.000107518	0.000385954
Ppp3cc	345.92	0.606414	0.156606	3.87222	0.000107849	0.000387045
Pinx1	136.078	1.03992	0.268661	3.87073	0.000108511	0.000389225
Ube2s	1047.91	0.503689	0.130332	3.86466	0.000111245	0.000398534
Podxl	1198.48	0.665447	0.172203	3.86432	0.0001114	0.000398887
Glrx3	1105.6	0.42857	0.110934	3.8633	0.000111866	0.000399956
Rnf2	552.185	0.625388	0.162122	3.85751	0.000114548	0.000409237
Ube2g1	1229	0.437557	0.113434	3.85737	0.000114615	0.000409375
Gabpb1	368.362	0.636474	0.16506	3.85601	0.000115251	0.000411339
Poc1b	144.856	0.770781	0.199925	3.85536	0.00011556	0.000412339
Gfer	140.267	0.925227	0.240002	3.85508	0.000115694	0.000412715
Kif18b	19.7561	2.93228	0.760894	3.85373	0.000116331	0.000414885
Slco3a1	472.153	0.601686	0.156184	3.85243	0.000116952	0.0004168
Ube2j1	2632.02	0.40267	0.104598	3.84967	0.000118275	0.000421291
Eif5b	2250.03	0.485272	0.126107	3.8481	0.000119036	0.000423582
Rsad1	120.416	0.946122	0.245894	3.84768	0.000119243	0.000424213
Terf2ip	785.568	0.515767	0.13406	3.84729	0.00011943	0.000424665
B3gnt6	10.5493	4.35318	1.13199	3.84559	0.000120261	0.000427197
Zc3h12a	50.5516	1.55615	0.404866	3.84362	0.000121233	0.000430329
Usp10	826.799	0.584956	0.152401	3.83828	0.000123898	0.000439462
Clint1	1159.02	0.488133	0.127324	3.83377	0.000126194	0.000447162
Ppard	572.115	0.478101	0.124767	3.83194	0.000127138	0.000450285
Trim3	1128.66	0.405299	0.105819	3.83011	0.000128086	0.000453416
Dzank1	2342.32	0.402728	0.105219	3.82751	0.000129445	0.000458002
Slc17a3	5.5606	5.92158	1.54724	3.82719	0.000129613	0.00045837
Grwd1	267.389	0.778512	0.203413	3.82725	0.000129584	0.00045837
Arhgap45	147.844	1.00159	0.261743	3.82662	0.000129916	0.000459102
Rbmxl1	658.513	0.549726	0.143683	3.82596	0.000130263	0.000460214
Ddx42	1838.43	0.416689	0.108917	3.82574	0.000130378	0.000460505
Rpl28	2407.46	0.413556	0.10811	3.82531	0.000130607	0.0004612
Pgr15l	5.70964	5.96001	1.55828	3.82474	0.00013091	0.000462156
Hdac1	542.576	0.601704	0.157512	3.82006	0.000133422	0.000470328
Ccnl1	686.093	0.592446	0.155091	3.81998	0.000133461	0.000470351
Arsj	53.8761	1.42566	0.373318	3.81889	0.000134055	0.000472328
Tmem248	326.601	0.633255	0.165841	3.81843	0.000134302	0.000473081
Casp4	77.6952	1.08099	0.283135	3.81793	0.000134578	0.000473937
Recql	401.484	0.534054	0.139954	3.81593	0.000135671	0.000477317
Ttc22	216.026	1.0416	0.273067	3.81447	0.000136475	0.000479911
Farsa	439.375	0.501412	0.131529	3.81218	0.000137749	0.000484152
Abl2	583.515	0.691952	0.181537	3.81164	0.00013805	0.00048509
Stk19	161.313	0.800834	0.210108	3.81153	0.000138107	0.00048517
Gpr153	427.352	0.86373	0.226657	3.81074	0.00013855	0.000486489
Fv1	698.751	0.610211	0.160272	3.80736	0.000140459	0.000492707
Lox	34.6478	2.09457	0.550168	3.80715	0.000140578	0.000493004
Nt5c3a	685.736	0.457114	0.120124	3.80535	0.000141605	0.000496241
Serpinb6a	305.813	0.732197	0.192433	3.80494	0.000141841	0.000496826
Lca5	215.919	0.869075	0.22859	3.80189	0.000143594	0.00050235
Gimap8	112.619	1.02843	0.270628	3.80015	0.000144608	0.000505774
Ppcs	120.09	0.900922	0.237167	3.79868	0.000145469	0.00050866
Dnajc25	78.0251	1.30405	0.343339	3.79813	0.000145791	0.000509664
Polr3b	507.13	0.759059	0.199861	3.79794	0.000145906	0.000509941
Atxn2l	2727.51	0.418713	0.110271	3.79713	0.000146381	0.000511352
Ercc6	705.97	0.511953	0.134883	3.79552	0.000147333	0.000514552
Spsb1	543.75	1.00382	0.264485	3.79536	0.000147427	0.000514755
Rad51	27.6041	1.96252	0.51715	3.79486	0.000147724	0.000515289
RGD1307554	365.881	0.582268	0.153446	3.79461	0.000147877	0.000515697
Pkp3	9.53102	5.71089	1.50579	3.79263	0.000149059	0.000519313
Rnf185	606.978	0.484204	0.127674	3.7925	0.000149137	0.000519459
Rprd2	801.96	0.469207	0.123727	3.79226	0.00014928	0.000519721
Max	1047.86	0.448025	0.118146	3.79213	0.00014936	0.000519856
[truncated: 15,269 more rows]

## Sheet: R vs M
id	baseMean	log2FC	lfcSE	stat	PValue	FDR
Fosb	998.482	-1.68291	0.185454	-9.07457	1.14131e-19	1.64121e-15
Nrn1	7591.51	-1.3836	0.16618	-8.3259	8.36892e-17	6.01725e-13
Nptx2	11091.7	-1.64638	0.200435	-8.21404	2.13868e-16	1.02514e-12
Cx3cl1	3636.39	-0.808205	0.105987	-7.62553	2.43036e-14	8.73715e-11
Arg1	95.325	2.05944	0.28549	7.21368	5.44606e-13	1.56629e-09
Bdnf	1657.13	-1.70115	0.24006	-7.08634	1.37702e-12	3.30027e-09
Rheb	2522.46	-0.766982	0.114577	-6.69404	2.17086e-11	4.45957e-08
Ccn2	456.07	1.73853	0.269074	6.46116	1.03901e-10	1.86762e-07
Vcan	1606.59	0.830184	0.129074	6.43184	1.2607e-10	2.01433e-07
Arpp21	4116.37	-0.890664	0.143216	-6.21901	5.003e-10	7.19432e-07
Anxa1	270.368	1.61132	0.267698	6.01918	1.75305e-09	1.96425e-06
Cd163	137.257	1.76295	0.292095	6.03553	1.5844e-09	1.96425e-06
Rgs7	2107.94	-0.843438	0.140174	-6.0171	1.77575e-09	1.96425e-06
Gfra2	697.945	-0.867186	0.145538	-5.95848	2.54596e-09	2.61507e-06
Plekhh2	899.625	-0.88893	0.15028	-5.91516	3.31555e-09	3.1785e-06
Sh3rf3	709.367	-0.750111	0.127374	-5.88903	3.88462e-09	3.4913e-06
Cbln2	1567.89	-1.15958	0.20094	-5.77076	7.89163e-09	6.67539e-06
R3hdm1	3507.95	-0.649743	0.114878	-5.65595	1.54982e-08	1.23814e-05
Sele	321.111	1.98883	0.354252	5.61416	1.97522e-08	1.49493e-05
Egr4	195.425	-1.51132	0.270022	-5.59703	2.1805e-08	1.56778e-05
Rgs2	1646.79	-0.710132	0.127913	-5.55167	2.82954e-08	1.93756e-05
Lilrb4	47.0663	2.97229	0.53967	5.50761	3.63742e-08	2.37755e-05
Ppp1r1a	1180.02	-0.637115	0.11938	-5.33687	9.45658e-08	5.91242e-05
Anpep	184.313	1.72295	0.329054	5.23607	1.64033e-07	9.82831e-05
Lsm11	1069.06	-1.07417	0.206289	-5.20711	1.91803e-07	0.000110325
Prmt8	432.816	-1.1281	0.221363	-5.09613	3.46668e-07	0.000191734
Bgn	910.011	0.804471	0.160307	5.01833	5.21232e-07	0.000277604
Cdo1	2210.61	-0.652587	0.132476	-4.92609	8.38931e-07	0.000377477
Col1a1	320.731	2.10451	0.426152	4.93841	7.87604e-07	0.000377477
Elmo1	1838.89	-0.948144	0.191626	-4.94787	7.50282e-07	0.000377477
Fn1	2431.33	1.4644	0.296795	4.93404	8.05458e-07	0.000377477
Rtl1	132.586	-1.60054	0.324927	-4.92584	8.40005e-07	0.000377477
Kcnj12	294.011	-0.895968	0.182292	-4.91503	8.87705e-07	0.000386824
Etv5	587.613	-0.796319	0.164189	-4.85003	1.23442e-06	0.000520118
RT1-Da	128.279	2.89329	0.597168	4.84503	1.26593e-06	0.000520118
Cd74	199.516	2.26945	0.476164	4.7661	1.87822e-06	0.000750243
Lingo1	2724.83	-1.11808	0.23724	-4.71284	2.44285e-06	0.00094941
Cpne4	287.794	-1.10197	0.236683	-4.65591	3.22553e-06	0.00114176
Mepe	101.517	-2.4776	0.53153	-4.66126	3.14277e-06	0.00114176
Mrc1	181.408	1.33368	0.286566	4.65401	3.25537e-06	0.00114176
RT1-Ba	36.7936	2.85826	0.613706	4.65738	3.20258e-06	0.00114176
Csf1	511.473	1.25153	0.270117	4.63331	3.59868e-06	0.00120248
Cyp11b1	580.399	-0.870941	0.188141	-4.62919	3.67092e-06	0.00120248
Lbh	362.034	-0.877263	0.189717	-4.62406	3.76298e-06	0.00120248
Lgals3	907.808	0.744931	0.161037	4.62584	3.73091e-06	0.00120248
Tagln	394.938	1.74582	0.378861	4.60806	4.06437e-06	0.00127056
Spred2	1638.11	-0.590321	0.129239	-4.56767	4.93173e-06	0.0015089
Srpk2	3387.99	-0.597592	0.132085	-4.52431	6.0594e-06	0.00181529
Faah	374.23	-0.701894	0.155913	-4.50184	6.73684e-06	0.00197706
Adcyap1	1318.32	-1.10227	0.245156	-4.49621	6.91752e-06	0.00198948
Ccn1	606.698	1.49432	0.333318	4.48315	7.35493e-06	0.0020738
Vgf	13461.3	-0.59402	0.133284	-4.45678	8.31986e-06	0.00230076
Car10	1527.17	-0.648074	0.145926	-4.44111	8.94952e-06	0.00242819
Camk1g	361.504	-0.677006	0.154078	-4.3939	1.11334e-05	0.00291089
Ptprc	408.363	1.13145	0.257468	4.39452	1.11018e-05	0.00291089
Kcnd3	1362.57	-0.565574	0.129378	-4.37148	1.23406e-05	0.00305961
Lgals1	311.924	1.72387	0.394306	4.37189	1.23173e-05	0.00305961
Slfn4	222.106	2.09914	0.479362	4.37903	1.19208e-05	0.00305961
Ostn	63.4975	-1.8749	0.431886	-4.3412	1.4171e-05	0.00339631
S100a11	75.3101	1.80347	0.415149	4.34415	1.39817e-05	0.00339631
Vim	3110.29	0.650604	0.150185	4.33201	1.47755e-05	0.00348314
Gask1b	157.14	0.934635	0.216944	4.30818	1.64602e-05	0.00381771
Arhgap31	1291.27	-0.769771	0.179191	-4.2958	1.74062e-05	0.00397303
Ifitm2	213.794	1.22817	0.288226	4.26114	2.03384e-05	0.00449948
S100a4	124.7	1.49576	0.35092	4.2624	2.02239e-05	0.00449948
Actr3b	634.223	-0.560631	0.132223	-4.24003	2.23489e-05	0.00476052
Cap2	1317.12	-0.598391	0.141383	-4.2324	2.31214e-05	0.00476052
Ccr2	59.9705	2.51558	0.593958	4.23527	2.28272e-05	0.00476052
Cd53	399.896	0.946675	0.223221	4.24097	2.22556e-05	0.00476052
Gjb2	107.305	2.41614	0.570937	4.23189	2.31736e-05	0.00476052
Wnt1	189.336	-2.12161	0.503659	-4.21238	2.52691e-05	0.00511788
Noct	2094.13	-0.806607	0.191725	-4.2071	2.58666e-05	0.00516613
Fam219a	2164.52	-0.515643	0.122779	-4.19977	2.67184e-05	0.00526317
Sorbs2	4013.86	-0.691221	0.166254	-4.15762	3.21584e-05	0.00624915
Edn1	98.0273	1.87623	0.454794	4.12544	3.70022e-05	0.00709456
Arhgap25	476.055	0.678272	0.164809	4.1155	3.86335e-05	0.00730986
Mis18a	57.0147	-3.06364	0.745718	-4.10831	3.98565e-05	0.00744334
Oprl1	439.846	0.715578	0.174429	4.10241	4.08868e-05	0.00753785
Id3	390.37	0.839281	0.20539	4.08629	4.38333e-05	0.00797877
Synpr	1292.45	-0.647265	0.159061	-4.06928	4.7158e-05	0.00847664
Adam8	122.273	1.09345	0.270648	4.04011	5.34257e-05	0.00936905
Pgbd5	933.868	-0.729429	0.180462	-4.04202	5.29934e-05	0.00936905
Ttc22	248.399	-0.737315	0.183169	-4.02533	5.68966e-05	0.00985751
Ppme1	3392.87	-0.539555	0.134441	-4.01332	5.98698e-05	0.0101286
Serpinb1a	84.9977	1.51378	0.377076	4.01451	5.95696e-05	0.0101286
Amotl2	381.62	0.720887	0.18039	3.99628	6.43466e-05	0.0107593
Tnc	1777.24	1.08986	0.273588	3.98359	6.78834e-05	0.0112203
Acsl3	3611.32	-0.449179	0.113068	-3.97264	7.10816e-05	0.0114849
Ttyh3	1867.57	-0.416141	0.104723	-3.97373	7.07553e-05	0.0114849
Emilin2	123.755	1.68798	0.425387	3.96811	7.24448e-05	0.0115659
Lum	61.8397	2.30528	0.58131	3.96567	7.31915e-05	0.0115659
Cdk14	2697.49	-0.587184	0.148198	-3.96217	7.42728e-05	0.0116092
Ctnnbip1	646.344	-0.625835	0.158995	-3.93619	8.27843e-05	0.0128004
Vwf	1859.82	0.839704	0.214664	3.91172	9.16412e-05	0.0140192
Nrsn1	4067.11	-0.520787	0.133795	-3.89241	9.92531e-05	0.0148673
Spcs3	2889.67	-0.415714	0.106796	-3.89258	9.91852e-05	0.0148673
Syt10	152.312	-1.3574	0.349835	-3.88011	0.00010441	0.0154785
Agap2	10336.4	-0.433241	0.111919	-3.87101	0.000108387	0.0159041
Ccdc88b	96.0464	1.2185	0.315363	3.8638	0.000111635	0.0162153
Entpd1	799.861	0.763508	0.198282	3.85061	0.000117824	0.0167912
Kcnj4	383.57	-0.728294	0.189149	-3.85038	0.000117935	0.0167912
Mustn1	709.366	-0.919293	0.240066	-3.82933	0.000128493	0.0175974
Ncf1	192.867	1.56057	0.407154	3.83287	0.000126659	0.0175974
Nid1	697.777	1.06893	0.278974	3.83163	0.000127296	0.0175974
Uxs1	1515.83	-0.466384	0.121585	-3.83587	0.000125123	0.0175974
Vopp1	1598.55	-0.476128	0.125198	-3.803	0.000142956	0.0193935
Ccl12	21.935	3.34177	0.881025	3.79305	0.00014881	0.0197837
Cpxm1	86.9431	1.90096	0.501422	3.79114	0.00014996	0.0197837
Ntng2	185.45	-0.731249	0.192678	-3.79519	0.00014753	0.0197837
Egr2	294.55	-1.43833	0.37971	-3.78798	0.000151878	0.0198546
Fbxo25	1113.62	-0.512719	0.135938	-3.77172	0.000162125	0.0210033
C2cd2l	1765.38	-0.448487	0.119147	-3.76415	0.000167119	0.0212853
Itgal	122.703	1.199	0.318861	3.76027	0.000169728	0.0212853
Kcnh1	1078.39	-0.636645	0.169254	-3.76147	0.000168915	0.0212853
RT1-Bb	25.9334	3.34075	0.888604	3.75954	0.000170223	0.0212853
Arc	766.522	-1.03724	0.276781	-3.74749	0.00017861	0.0217662
Heg1	1318.18	0.729356	0.194539	3.74915	0.000177432	0.0217662
Pam	8191.4	-0.620804	0.165541	-3.75015	0.000176732	0.0217662
Myo1g	55.3841	1.82951	0.488824	3.74267	0.000182073	0.0220018
Cbr3	180.297	-0.869746	0.233156	-3.73032	0.000191234	0.0227724
Gne	523.995	-0.629018	0.168912	-3.72394	0.000196135	0.0227724
Igsf6	109.266	1.5244	0.40901	3.72705	0.000193734	0.0227724
S100a6	173.349	1.70577	0.458091	3.72364	0.000196369	0.0227724
Slc27a3	143.413	-0.882765	0.237011	-3.72457	0.00019565	0.0227724
Abcb1b	336.176	0.68261	0.183836	3.71314	0.000204702	0.0234671
Fabp4	30.0523	2.23538	0.602201	3.71201	0.000205622	0.0234671
Smap2	2435.22	-0.456806	0.123368	-3.70278	0.000213251	0.024146
Antxr2	911.453	-0.654427	0.177584	-3.68517	0.000228553	0.0254775
Cxcr2	63.7572	2.03624	0.552546	3.6852	0.000228526	0.0254775
Arhgap26	1251.55	-0.767476	0.209024	-3.67171	0.000240937	0.0266513
Cfh	1156.43	0.521879	0.142238	3.66905	0.000243453	0.0267241
Magi3	1891.69	-0.473095	0.129096	-3.66467	0.000247662	0.0269801
Plscr2	85.0588	1.32069	0.363753	3.63074	0.000282613	0.0305562
Cd68	78.3519	1.1147	0.307812	3.62138	0.000293034	0.0310198
Dok5	1036.05	-0.64606	0.178302	-3.62341	0.000290749	0.0310198
Hip1	960.711	0.516495	0.142635	3.62108	0.000293372	0.0310198
RGD1306271	1760.73	-0.420591	0.116295	-3.61658	0.000298519	0.0313336
Cbarp	1980.77	-0.51135	0.141713	-3.60835	0.000308151	0.0318792
Zc3hav1	330.393	0.582967	0.16156	3.60835	0.000308146	0.0318792
Arpc1b	791.238	0.704295	0.195871	3.5957	0.000323517	0.0332298
P2ry2	125.28	1.46449	0.407851	3.59075	0.000329733	0.0336281
C5ar2	135.443	0.980921	0.274037	3.57951	0.000344233	0.034266
Eif6	1170.14	-0.377646	0.105511	-3.5792	0.000344654	0.034266
Olr1	323.89	1.43221	0.399899	3.58142	0.000341731	0.034266
Slpi	103.925	2.28363	0.638147	3.57854	0.00034552	0.034266
Gsto1	1007.48	-0.407485	0.114903	-3.54634	0.000390616	0.038473
Pim2	721.1	-0.755155	0.213448	-3.53788	0.000403346	0.0394566
Samsn1	41.4675	1.70582	0.482758	3.53349	0.000410106	0.0398467
Dhcr24	4531.38	-0.67157	0.190366	-3.52778	0.000419054	0.0404429
Dgkz	3251.44	-0.566408	0.1607	-3.52464	0.000424061	0.0406533
Eng	1140.1	0.956943	0.271922	3.51918	0.000432882	0.0408313
Kl	96.7849	-1.46447	0.416455	-3.51651	0.000437268	0.0408313
Rassf9	51.4271	1.38975	0.395011	3.51825	0.000434395	0.0408313
Vamp8	182.191	0.747388	0.212538	3.5165	0.000437276	0.0408313
Syt5	2676.76	-0.411593	0.117248	-3.51044	0.000447363	0.0415037
Selp	87.8387	2.31342	0.661789	3.49571	0.000472811	0.0435835
Ahnak	1885.51	0.817759	0.234486	3.48745	0.000487645	0.0446646
Mnt	826.075	-0.4396	0.126166	-3.48429	0.000493449	0.0449101
Aebp1	655.958	1.07695	0.309564	3.47892	0.000503434	0.0452461
Fbxw4	608.836	-0.450446	0.129454	-3.47958	0.000502197	0.0452461
Hopx	1234.65	-0.734209	0.211424	-3.47268	0.000515281	0.0460233
Hvcn1	154.866	0.973579	0.28141	3.45965	0.000540876	0.0478429
Xpo1	3129.15	-0.41837	0.120953	-3.45894	0.000542309	0.0478429
Wdfy4	90.8515	1.05255	0.304851	3.45266	0.000555092	0.0486721
Cfap70	661.65	-1.21291	0.352867	-3.4373	0.000587535	0.0512046
Emp3	177.379	0.992174	0.289765	3.42407	0.000616917	0.0518787
Gpnmb	2381.96	0.828419	0.241836	3.42553	0.000613592	0.0518787
Hist1h2bq	871.879	0.758277	0.22132	3.42616	0.000612172	0.0518787
Lgmn	3997.2	0.432183	0.126094	3.42747	0.000609232	0.0518787
Pmm1	1330.99	-0.403598	0.117864	-3.42426	0.000616478	0.0518787
Sec61a2	1633.01	-0.421122	0.122751	-3.43071	0.000602004	0.0518787
Acan	469.136	-1.10899	0.324235	-3.42032	0.000625484	0.0522934
Adamts7	90.2799	1.01834	0.29817	3.41529	0.000637132	0.052587
Cd300le	23.9295	2.20883	0.648452	3.40631	0.000658471	0.052587
Grb2	7728.11	-0.425656	0.12496	-3.40634	0.00065839	0.052587
Homer1	2315.37	-0.601044	0.176424	-3.40681	0.000657258	0.052587
Islr	94.6219	2.05041	0.601301	3.40996	0.000649714	0.052587
Lipm	14.5549	-2.37755	0.698149	-3.4055	0.000660419	0.052587
Nck2	737.447	-0.415178	0.121936	-3.40489	0.000661908	0.052587
Pou4f3	512.841	-1.34659	0.395125	-3.40802	0.000654363	0.052587
Zranb3	215.77	-0.64692	0.189431	-3.41507	0.000637659	0.052587
Clec10a	41.8486	2.26591	0.666707	3.39866	0.000677156	0.0532104
Pbx3	362.452	-0.589906	0.1735	-3.40003	0.000673789	0.0532104
Col18a1	515.701	0.889287	0.261917	3.3953	0.000685533	0.0533523
Mvp	687.834	0.703069	0.207182	3.39349	0.000690092	0.0533523
Rgs4	12529.3	-0.843815	0.248651	-3.39357	0.00068989	0.0533523
F13a1	57.306	1.58009	0.466074	3.39021	0.000698397	0.0537056
Myo1f	210.971	0.885351	0.261592	3.38448	0.000713133	0.0545471
Gadl1	95.8238	-1.07641	0.318577	-3.3788	0.000728018	0.0551793
Lcp1	1538.17	0.633321	0.187461	3.37841	0.000729072	0.0551793
Hcrtr1	108.157	-0.937634	0.277919	-3.37377	0.000741465	0.0554909
Hr	684.75	-0.489969	0.145404	-3.36971	0.000752485	0.0554909
Loxl1	93.4467	1.46627	0.43509	3.37003	0.000751601	0.0554909
Miga2	1219.18	-0.43415	0.128653	-3.37458	0.000739283	0.0554909
Stx1a	3356.32	-0.404415	0.119988	-3.37046	0.000750425	0.0554909
Fgf13	1427.73	-0.421577	0.125255	-3.36574	0.000763389	0.0560078
Rassf4	236.625	0.899085	0.267294	3.36366	0.000769159	0.0561447
Ahrr	14.3138	-2.13572	0.635384	-3.3613	0.000775753	0.0563401
Cdk5r1	2175.13	-0.384043	0.114358	-3.35826	0.000784349	0.0566781
Fstl1	778.777	0.935964	0.279216	3.35212	0.000801963	0.0570902
Hecw2	1502.81	-0.544098	0.162201	-3.35447	0.000795173	0.0570902
Opa3	979.124	-0.418254	0.124756	-3.35256	0.000800669	0.0570902
Grem2	2180.14	-0.516578	0.154178	-3.35052	0.000806592	0.0571369
Capg	325.073	0.875122	0.261481	3.34679	0.000817546	0.0575945
Notch2	719.814	0.542321	0.162165	3.34425	0.000825068	0.0575945
Slc12a7	177.63	0.958763	0.286591	3.3454	0.000821631	0.0575945
Fmo1	14.8955	2.44441	0.732347	3.33778	0.000844505	0.0586666
Gng11	155.967	0.808338	0.24241	3.33459	0.000854246	0.0587763
Lats2	407.24	0.512154	0.15365	3.33326	0.000858346	0.0587763
Tnfsf18	146.252	-1.51663	0.454938	-3.33371	0.000856967	0.0587763
Arhgap33	876.258	-0.425414	0.128145	-3.3198	0.000900833	0.0599721
Cntn3	334.878	-0.650557	0.195956	-3.31991	0.000900451	0.0599721
Cst7	14.8479	3.66616	1.10393	3.32102	0.000896888	0.0599721
Ddn	10461.8	-0.51417	0.154716	-3.32332	0.000889543	0.0599721
Jup	735.183	0.651685	0.196239	3.32087	0.000897383	0.0599721
Tspan5	5064.11	-0.475305	0.1429	-3.32615	0.000880553	0.0599721
Cald1	1091.04	0.721096	0.217563	3.31442	0.000918338	0.0608558
Tor3a	227.746	-0.768371	0.231918	-3.31311	0.000922638	0.0608602
Nfe2l2	673.954	0.53939	0.162968	3.30979	0.00093365	0.0613054
Osbp2	781.159	-0.665648	0.201301	-3.30673	0.000943921	0.0616981
Lgals3bp	216.165	0.735191	0.222487	3.30442	0.000951715	0.0619261
Col15a1	190.728	0.901587	0.272968	3.30291	0.000956884	0.0619819
Vegfa	2720.19	-0.552254	0.167291	-3.30116	0.00096285	0.0620887
Slc38a3	275.103	-0.854711	0.259853	-3.28921	0.00100469	0.0644973
Il2rg	122.091	1.43789	0.43791	3.28352	0.00102519	0.0655208
Clec2g	866.343	0.687802	0.209665	3.28047	0.00103633	0.0659402
Adam17	526.198	0.611644	0.187034	3.27023	0.0010746	0.0670032
Chrdl2	6.44478	-4.30798	1.31583	-3.27397	0.00106048	0.0670032
Fgl2	1139.87	0.652735	0.199562	3.27084	0.0010723	0.0670032
Gbp2	163.647	0.939594	0.287358	3.26977	0.00107634	0.0670032
Map3k9	589.778	-0.499612	0.152664	-3.27262	0.00106555	0.0670032
Actn1	4799.25	-0.510695	0.156382	-3.2657	0.00109194	0.0671032
Fgf9	595.057	-0.788959	0.241581	-3.26582	0.00109147	0.0671032
Spn	21.4259	2.30724	0.70634	3.26647	0.00108896	0.0671032
Plek	305.645	0.887251	0.272204	3.25951	0.00111604	0.0682921
Ankrd63	678.471	-0.737977	0.227046	-3.25034	0.00115268	0.0693252
Ifitm1	84.152	1.36097	0.419008	3.24808	0.00116185	0.0693252
Ly6c	29.0359	2.90222	0.892731	3.25095	0.00115021	0.0693252
Nampt	2269.94	-0.457345	0.140696	-3.25059	0.00115165	0.0693252
Rab11fip1	45.9356	1.83298	0.564213	3.24873	0.00115921	0.0693252
Slc17a6	364.546	-0.894733	0.275337	-3.24959	0.00115572	0.0693252
Eml5	761.85	-0.509554	0.157049	-3.24456	0.00117632	0.0698988
Rnaset2	369.326	0.627144	0.193434	3.24217	0.00118624	0.0701982
Nynrin	158.346	0.731982	0.225873	3.24068	0.00119246	0.0702769
Ak5	3952.79	-0.521935	0.161285	-3.2361	0.00121177	0.0704272
Aldh1a2	119.006	1.71762	0.531816	3.22973	0.00123909	0.0704272
Bcl2a1	126.337	1.16836	0.361689	3.23029	0.00123663	0.0704272
Flna	3080.88	0.652674	0.202061	3.23008	0.00123754	0.0704272
Ftl1	5160.72	0.831415	0.256838	3.23712	0.00120743	0.0704272
Mcemp1	27.9419	2.58986	0.8018	3.23006	0.00123766	0.0704272
Mnda	13.1625	3.27665	1.01361	3.23264	0.0012265	0.0704272
Scg2	12683.1	-0.634173	0.19595	-3.2364	0.00121049	0.0704272
Sync	349.798	-0.581089	0.179647	-3.23461	0.00121808	0.0704272
Ripk3	139.823	1.00207	0.310387	3.22844	0.00124465	0.070465
Ndnf	76.2093	1.42857	0.443343	3.22228	0.00127174	0.0714363
Rac2	85.7273	1.54294	0.478677	3.22334	0.00126707	0.0714363
Fndc3b	501.664	0.558536	0.1737	3.21552	0.00130208	0.0728558
Gpr158	7712.95	-0.64765	0.201606	-3.21245	0.00131607	0.0733532
Igf2	333.626	1.27467	0.397349	3.20792	0.00133698	0.073945
Snrpa1	666.721	-0.516332	0.160955	-3.20793	0.00133693	0.073945
Zfp612	2253.72	-0.364445	0.113656	-3.20655	0.00134336	0.0740136
Msr1	439.631	0.593753	0.185656	3.19813	0.00138322	0.0759185
Col6a2	270.643	0.89933	0.281565	3.19404	0.00140296	0.0764178
Igsf21	705.855	-0.652976	0.204439	-3.19399	0.00140322	0.0764178
Lama1	97.7726	1.30228	0.407861	3.19295	0.00140826	0.0764178
Dlgap2	1441.22	-0.795591	0.249644	-3.18689	0.00143809	0.0771557
Kcnv2	5.06698	5.69911	1.7893	3.18511	0.00144697	0.0771557
Penk	736.664	-0.755937	0.23736	-3.18477	0.00144868	0.0771557
RT1-Db1	33.5259	2.32321	0.72872	3.18807	0.00143224	0.0771557
Thap3	156.498	-0.786554	0.24683	-3.18663	0.00143943	0.0771557
Siglec8	21.7268	2.11974	0.666212	3.18179	0.00146369	0.0776673
Laptm5	417.026	0.596282	0.187767	3.17565	0.00149502	0.0790383
Fgr	230.379	1.09997	0.346928	3.17061	0.00152118	0.0801265
Fkbp9	205.074	0.72317	0.228341	3.16706	0.0015399	0.080787
Grk5	367.493	0.519165	0.163976	3.1661	0.00154495	0.080787
Akap12	4227.91	0.44619	0.141184	3.16035	0.00157582	0.0821025
Inpp5a	868.308	-0.490528	0.155293	-3.15872	0.00158462	0.0822631
Akap13	834.997	0.395503	0.125431	3.15314	0.00161524	0.0835511
Fbn1	620.643	0.938929	0.298174	3.14894	0.00163866	0.08356
Gimap9	69.7698	1.19208	0.378501	3.14948	0.00163562	0.08356
Idnk	47.2629	1.05676	0.335565	3.14921	0.00163712	0.08356
Jarid2	1161.87	-0.504229	0.160037	-3.1507	0.00162882	0.08356
Itgb2	674.186	0.726862	0.231159	3.14443	0.00166413	0.0836722
Lpcat1	1286.56	-0.378825	0.120446	-3.14518	0.00165982	0.0836722
Pld4	298.361	0.698316	0.222076	3.14449	0.00166376	0.0836722
Smim29	187.513	-0.589031	0.187265	-3.14544	0.00165839	0.0836722
Atp13a2	2558.28	-0.335526	0.106913	-3.13831	0.00169926	0.0851404
Arhgap28	26.1789	1.4845	0.473722	3.1337	0.00172618	0.0861893
Cdc34	952.473	-0.397353	0.126849	-3.13249	0.00173328	0.0862441
Lmtk2	4674.94	-0.402711	0.128843	-3.12558	0.00177455	0.087993
Dtnb	547.319	-0.481443	0.154234	-3.12152	0.00179923	0.0889102
Cdh4	592.11	-0.510537	0.163858	-3.11573	0.00183491	0.0903631
Zfp280d	1254.73	-0.385201	0.123749	-3.11275	0.00185353	0.0909683
Foxp1	364.618	0.452679	0.145641	3.10818	0.00188245	0.0920734
Tcp11l2	291.923	0.590641	0.190154	3.10612	0.00189559	0.092402
C3	140.346	1.37102	0.442122	3.101	0.00192867	0.093068
Srl	22.3198	-1.5744	0.507603	-3.10163	0.00192456	0.093068
Tuba4a	3094.96	-0.401337	0.12934	-3.10297	0.00191586	0.093068
Amigo2	61.5963	-1.1386	0.368043	-3.09365	0.00197712	0.0936308
Dock11	176.075	0.659159	0.213092	3.09331	0.0019794	0.0936308
Myo1c	974.457	0.615838	0.198905	3.09614	0.00196057	0.0936308
Rnf227	4771.29	-0.524583	0.16956	-3.09379	0.00197619	0.0936308
Scn7a	43.3626	2.63916	0.852621	3.09535	0.00196584	0.0936308
Trim3	1214.78	-0.377995	0.122123	-3.09519	0.00196684	0.0936308
Chd4	4067.11	0.339562	0.109903	3.08966	0.00200386	0.0940329
Mical2	3446.3	-0.477386	0.154538	-3.08912	0.00200752	0.0940329
Phf24	2327.7	-0.304403	0.098533	-3.08935	0.00200596	0.0940329
Rftn1	70.965	1.06637	0.345498	3.08647	0.00202548	0.0944835
Rock2	10157.5	-0.316019	0.102412	-3.08577	0.00203028	0.0944835
Fcgr2a	871.96	0.687385	0.222875	3.08418	0.00204117	0.0946841
Nell2	5134.8	-0.343903	0.111776	-3.07673	0.00209285	0.0967692
Cd180	71.5866	1.12209	0.365304	3.07167	0.00212867	0.09811
Sccpdh	4583.97	-0.618205	0.201388	-3.06972	0.00214261	0.0984368
Piezo2	87.7562	-1.1982	0.392176	-3.05526	0.00224869	0.102981
Cdh23	27.8488	-1.62707	0.533405	-3.05036	0.00228569	0.104344
Eln	196.88	1.02327	0.336368	3.04211	0.00234925	0.106906
Esm1	42.1236	2.41906	0.795915	3.03934	0.00237098	0.107554
Il33	687.641	0.745683	0.245548	3.03681	0.00239097	0.10812
Hk3	93.0732	1.06844	0.353343	3.0238	0.00249624	0.112526
Grm7	932.845	-0.549158	0.181857	-3.01972	0.00253011	0.112869
Sorcs3	3837.52	-0.733905	0.243094	-3.01902	0.00253592	0.112869
Spag6l	12.259	-2.32519	0.77031	-3.01851	0.00254018	0.112869
Stambpl1	587.806	-0.446369	0.147894	-3.01817	0.00254308	0.112869
Zmiz1	6252.29	-0.527801	0.174736	-3.02057	0.00252302	0.112869
Ldb2	682.422	-0.795641	0.263705	-3.01716	0.00255154	0.112896
Pear1	130.337	1.00897	0.334898	3.01277	0.00258873	0.11419
Atcay	3729.99	-0.40556	0.134857	-3.00732	0.0026356	0.114965
Diras2	7145.8	-0.732718	0.243737	-3.00619	0.00264545	0.114965
Grb14	166.363	-0.726277	0.241325	-3.00954	0.00261648	0.114965
Ifi30	266.527	0.778406	0.259022	3.00518	0.00265427	0.114965
Pdgfra	880.146	0.976409	0.324868	3.00556	0.00265092	0.114965
Samd10	89.9697	-0.907956	0.30189	-3.00758	0.0026334	0.114965
Zfp366	105.602	0.957656	0.319262	2.99959	0.00270344	0.116743
Ctsl	3129.44	0.468401	0.156298	2.99685	0.00272788	0.116886
Lamb3	251.489	-0.848449	0.283034	-2.9977	0.00272029	0.116886
Olfm1	5983.43	-0.506941	0.169179	-2.99648	0.00273113	0.116886
Capn1	74.7176	0.940759	0.314202	2.99412	0.00275234	0.117444
Adamts10	192.838	0.672063	0.224713	2.99076	0.0027828	0.117474
Bscl2	879.277	0.472436	0.157908	2.99184	0.00277303	0.117474
Bst1	36.2532	2.0608	0.689129	2.99044	0.00278573	0.117474
Csf3r	84.6406	1.49271	0.499114	2.99072	0.00278324	0.117474
Osr1	32.5716	2.15865	0.722972	2.9858	0.00282839	0.118925
Fcer1g	574.742	0.868399	0.291101	2.98316	0.00285291	0.119258
Ptp4a2	3280.86	-0.299162	0.100272	-2.9835	0.0028497	0.119258
Inhba	1335.81	-0.924067	0.310026	-2.98061	0.00287677	0.119907
Irf8	177.792	0.968782	0.325132	2.97966	0.00288573	0.119933
Fbln1	230.768	1.32747	0.446293	2.97444	0.0029352	0.121288
Gopc	2288.72	-0.416686	0.140084	-2.97454	0.00293426	0.121288
Atad3a	732.422	-0.339281	0.114282	-2.9688	0.00298968	0.121503
Dmtf1	1605.43	-0.496838	0.167432	-2.9674	0.00300331	0.121503
Fam180a	24.4625	3.48981	1.17627	2.96683	0.00300885	0.121503
Il21r	9.39026	3.61108	1.21708	2.96701	0.00300709	0.121503
Lama4	877.007	0.684775	0.23087	2.96606	0.00301644	0.121503
Mmd	4548.19	-0.453214	0.152453	-2.97281	0.00295083	0.121503
Ms4a4a	45.322	1.17804	0.397091	2.96668	0.00301033	0.121503
Tsga10	333.872	-0.55429	0.18651	-2.9719	0.0029596	0.121503
Zbtb20	156.894	0.672956	0.226797	2.96722	0.00300506	0.121503
Prss56	102.849	-1.95813	0.660376	-2.96518	0.00302507	0.12151
Pygb	1383.71	0.435037	0.146959	2.96026	0.00307382	0.123124
Hdx	119.652	-0.648775	0.219304	-2.95834	0.003093	0.123405
Sertm1	464.296	-0.783436	0.264867	-2.95784	0.003098	0.123405
Pafah1b3	190.583	-0.54252	0.183544	-2.95581	0.00311851	0.123879
AC130391.3	290.696	0.53092	0.179739	2.95384	0.00313848	0.124329
Plk2	5284.57	-0.50921	0.172497	-2.95199	0.00315733	0.12439
Tmem201	396.047	-0.476175	0.161303	-2.95206	0.00315665	0.12439
Rasgef1a	2042.6	-0.374604	0.127078	-2.94783	0.00320008	0.12573
Atp6v0a1	7243.62	-0.320251	0.108748	-2.9449	0.00323064	0.126585
Clec4a1	45.2522	1.74334	0.592962	2.94006	0.00328149	0.127609
Cytip	22.4552	1.87194	0.636646	2.94032	0.00327876	0.127609
Mvd	644.215	-0.668283	0.227316	-2.93988	0.00328339	0.127609
Slamf9	16.4534	2.62704	0.894394	2.93723	0.00331163	0.128359
Il6st	4725.99	0.382414	0.13068	2.92633	0.00342984	0.132583
Zfp780b	429.836	-0.621952	0.212662	-2.9246	0.00344898	0.132966
Cers4	740.866	-0.429393	0.147085	-2.91936	0.00350754	0.134862
Atxn1	586.101	-0.54219	0.185827	-2.91772	0.003526	0.13521
Tmtc4	389.483	0.585426	0.200718	2.91666	0.00353805	0.135312
Masp1	279.372	0.528896	0.181525	2.91363	0.00357247	0.136266
MGC93861	8.81665	2.64288	0.907709	2.91159	0.00359589	0.136796
Hck	146.338	0.988734	0.339832	2.90948	0.00362031	0.137362
Adprhl1	65.9196	-1.03497	0.355852	-2.90842	0.00363259	0.137465
Kcnf1	1250.65	-0.480208	0.165234	-2.90623	0.00365817	0.13794
Rprd1a	2213.59	-0.352384	0.121273	-2.9057	0.00366433	0.13794
Niban1	147.109	0.785783	0.270727	2.90249	0.00370206	0.138996
Dennd2b	220.143	0.570926	0.196876	2.89993	0.00373251	0.139051
Insyn2a	202.138	-0.652723	0.224962	-2.90148	0.00371402	0.139051
Lilrb3a	53.6195	1.77297	0.611382	2.89994	0.00373239	0.139051
Cav1	544.244	0.72202	0.249247	2.89681	0.00376981	0.139981
Clec11a	279.844	-0.473245	0.163456	-2.89524	0.00378863	0.139981
Slc27a4	1535.09	-0.353042	0.121966	-2.8946	0.00379644	0.139981
Vcam1	258.778	0.739228	0.25526	2.89598	0.0037798	0.139981
Arhgap42	180.719	0.65961	0.228198	2.89052	0.00384609	0.14074
Lpcat4	766.168	-0.410607	0.142041	-2.89077	0.003843	0.14074
Snca	4099.17	-0.441942	0.152937	-2.8897	0.00385615	0.14074
Tmsb10	565.282	0.618782	0.21413	2.88975	0.0038555	0.14074
Adgrl4	371.967	0.568799	0.196914	2.88856	0.00387004	0.140889
Nos1ap	847.348	0.383482	0.132802	2.88763	0.00388153	0.140951
Haus8	213.312	-0.675861	0.234378	-2.88363	0.00393118	0.142394
Dusp4	1026.5	-0.81136	0.281654	-2.8807	0.0039679	0.143363
AC123358.1	4.51217	4.51484	1.56833	2.87876	0.00399243	0.143888
Ceacam4	34.819	1.47491	0.512781	2.87631	0.0040236	0.143929
Col1a2	396.45	2.01576	0.700588	2.87724	0.00401165	0.143929
Marchf10	20.2233	-1.56704	0.544795	-2.87638	0.00402261	0.143929
Dscaml1	1300.86	-0.540669	0.188147	-2.87366	0.00405751	0.144782
Ankrd37	46.3683	-1.22508	0.426668	-2.87127	0.00408824	0.145071
Atp8b1	57.5267	1.54102	0.536634	2.87164	0.00408349	0.145071
Tmem47	3241.19	-0.452042	0.157469	-2.87068	0.00409589	0.145071
Panx1	854.306	-0.506036	0.176501	-2.86705	0.00414322	0.146387
Kank2	380.785	0.659835	0.230365	2.8643	0.00417931	0.1473
Kdm3a	854.83	-0.434139	0.151764	-2.86062	0.00422813	0.148656
Folr2	32.7045	1.28608	0.449916	2.85849	0.00425656	0.149125
Tshz3	674.506	-0.525423	0.183838	-2.85808	0.0042622	0.149125
Cyp27b1	396.97	-0.98422	0.34473	-2.85505	0.00430304	0.150189
Ifitm3	710.519	0.614958	0.215739	2.85047	0.00436548	0.151632
Slfn5	217.894	0.750969	0.263393	2.85114	0.00435633	0.151632
Tbc1d1	766.996	0.429007	0.150591	2.84882	0.0043882	0.152054
Hira	1546.38	-0.377774	0.132919	-2.84215	0.00448108	0.153424
Mmp24	898.821	-0.378457	0.133057	-2.84433	0.00445048	0.153424
Prelp	88.2505	1.60553	0.564899	2.84216	0.00448092	0.153424
Shc4	499.815	-0.559453	0.196683	-2.84444	0.00444892	0.153424
Slitrk2	429.049	0.580863	0.204362	2.84232	0.0044786	0.153424
Cacng3	410.294	-0.662131	0.233107	-2.84046	0.0045048	0.153869
Ccbe1	29.5506	1.18298	0.417053	2.83652	0.0045608	0.155214
Cd48	299.887	0.826326	0.291353	2.83617	0.00456577	0.155214
Vgll4	354.358	-0.526456	0.185709	-2.83485	0.00458473	0.155492
Cd274	133.424	0.72804	0.257106	2.83167	0.00463055	0.156238
Cxcl6	13.8023	2.73439	0.965497	2.83211	0.00462423	0.156238
Uck2	658.381	-0.558988	0.197448	-2.83106	0.00463933	0.156238
Sgip1	7879.63	-0.496872	0.17579	-2.8265	0.00470598	0.158112
Zfp580	131.545	-0.58679	0.208031	-2.82068	0.00479216	0.160632
Dysf	143.475	1.01207	0.35937	2.81623	0.00485911	0.161808
Gng4	348.067	-0.561669	0.199365	-2.81728	0.00484316	0.161808
Sh3tc1	97.6204	0.746233	0.264988	2.8161	0.00486101	0.161808
Abca9	21.8065	1.56381	0.555576	2.81475	0.00488146	0.162114
Itga5	477.933	0.708378	0.251842	2.81279	0.00491144	0.162734
Ikzf1	152.424	0.803653	0.28593	2.81066	0.00494393	0.163344
Svil	410.986	0.632764	0.225175	2.8101	0.00495257	0.163344
Tm4sf1	496.993	0.710219	0.25289	2.80841	0.00497863	0.163828
Smpdl3a	173.465	0.950615	0.33884	2.8055	0.00502386	0.164631
Zbtb46	126.339	-0.674639	0.240482	-2.80537	0.00502595	0.164631
Rilpl1	880.951	-0.477447	0.170558	-2.79932	0.00512108	0.167366
Colec12	91.8128	1.82467	0.652862	2.79488	0.00519194	0.168914
Dab2	996.52	0.582869	0.208542	2.79497	0.00519043	0.168914
Scara5	36.3829	1.58354	0.566784	2.79391	0.00520753	0.169039
Golim4	434.572	0.430191	0.15405	2.79254	0.00522953	0.169371
Lzts1	1318.11	-0.476984	0.170853	-2.79178	0.00524185	0.169388
Dlgap3	1480.52	-0.551221	0.197551	-2.79027	0.00526641	0.16942
Rnaseh2a	173.776	0.743338	0.266371	2.79061	0.00526095	0.16942
Dap	160.175	0.850694	0.305275	2.78665	0.00532567	0.170945
Tmod1	944.593	-0.449022	0.161305	-2.78369	0.00537451	0.172128
Jpt2	366.214	0.467947	0.168275	2.78084	0.00542183	0.172873
Myof	300.93	1.0765	0.38703	2.78145	0.00541163	0.172873
Nek7	1578.56	0.393523	0.141601	2.77909	0.00545111	0.173423
Crabp2	123.169	1.29976	0.468252	2.77577	0.00550709	0.174817
Far2	533.02	-0.78532	0.283117	-2.77384	0.00553994	0.175087
Plppr4	8811.66	-0.576853	0.207934	-2.77422	0.00553351	0.175087
B4galt1	169.375	0.706631	0.254933	2.77183	0.00557415	0.175781
Sigmar1	1063.98	-0.411821	0.14864	-2.77059	0.0055955	0.176068
Exosc9	672.644	-0.359855	0.130044	-2.76717	0.00565457	0.177539
R3hdm2	2444.54	-0.363864	0.13169	-2.76304	0.00572654	0.179407
Mybl1	162.456	0.538332	0.19499	2.76083	0.00576554	0.180236
Olfml2b	297.194	0.562413	0.203858	2.75885	0.00580059	0.180642
Tusc3	1767.61	-0.368499	0.133579	-2.75867	0.00580365	0.180642
Cacna1d	1441.44	-0.499714	0.181489	-2.75341	0.00589775	0.181217
Ctnna1	2162.7	0.395245	0.143382	2.75659	0.00584067	0.181217
Haspin	55.5337	0.980351	0.355687	2.75622	0.00584736	0.181217
Ptpn6	221.562	0.764011	0.277421	2.75398	0.00588751	0.181217
Traf1	14.6295	2.14846	0.77979	2.75518	0.00586602	0.181217
Zdhhc2	976.592	-0.412746	0.149835	-2.75467	0.0058752	0.181217
Phf10	335.107	0.474781	0.172545	2.75163	0.0059299	0.181817
Fam81a	1039.19	-0.424849	0.154459	-2.75056	0.00594926	0.181941
Mmp2	96.2743	0.955719	0.347563	2.74977	0.0059637	0.181941
Tmem150b	220.001	-0.661752	0.240697	-2.74932	0.00597191	0.181941
P2ry10	7.66587	2.935	1.06859	2.7466	0.00602159	0.18268
Scd	418.337	-0.69429	0.252781	-2.74661	0.00602155	0.18268
Dcn	274.629	2.34132	0.853232	2.74406	0.0060684	0.182696
Galnt17	1130.65	-0.546289	0.199093	-2.74388	0.00607168	0.182696
Kifc2	2774.2	-0.422596	0.154037	-2.74348	0.00607922	0.182696
Lmod1	42.4528	1.20562	0.439249	2.74472	0.00605624	0.182696
Zfyve28	723.498	-0.416245	0.151741	-2.74313	0.00608564	0.182696
Col8a1	41.941	1.45802	0.532322	2.73898	0.00616302	0.184578
Thrb	1586.26	-0.561265	0.204961	-2.73839	0.00617399	0.184578
Mafb	220.595	0.79248	0.289664	2.73586	0.00622171	0.185384
Nfam1	101.07	0.912143	0.333435	2.7356	0.00622674	0.185384
Gpat3	807.761	-0.703229	0.257161	-2.73459	0.00624581	0.185568
A2m	433.773	1.10524	0.404481	2.7325	0.00628555	0.185792
Parvg	121.997	0.829485	0.303548	2.73263	0.00628305	0.185792
Pdcd1	6.46941	3.45562	1.2648	2.73216	0.00629213	0.185792
Sgtb	3222.34	-0.37033	0.135612	-2.7308	0.00631803	0.186175
Nrg1	154.336	-0.68096	0.249479	-2.72953	0.00634244	0.186512
Preb	642.463	-0.325187	0.119327	-2.72516	0.00642697	0.188612
Chst10	1615.97	-0.441735	0.16214	-2.72441	0.00644164	0.188657
Ackr3	229.298	1.07366	0.394602	2.72088	0.00651085	0.189233
Arl11	83.8256	0.932067	0.342832	2.71872	0.00655341	0.189233
Atad2	292.122	0.500745	0.184112	2.71979	0.00653239	0.189233
Gpx1	687.122	0.589332	0.216451	2.7227	0.00647505	0.189233
Narf	1409.07	-0.467232	0.171853	-2.71878	0.00655233	0.189233
Pdgfrb	683.707	0.70184	0.258012	2.72019	0.00652453	0.189233
Wwc1	897.401	-0.526943	0.193702	-2.72038	0.00652071	0.189233
Apobr	57.4275	1.07656	0.396702	2.71378	0.00665198	0.191311
Ciita	7.36375	3.20668	1.18154	2.71399	0.0066479	0.191311
Dapp1	148.235	1.01864	0.375589	2.71212	0.0066855	0.191891
Lrrc74b	14.2669	-1.93531	0.714161	-2.70991	0.00673014	0.192404
Ubash3a	17.2181	-1.63561	0.603449	-2.71044	0.00671947	0.192404
Rab29	126.418	0.764544	0.282488	2.70647	0.00680037	0.194027
Fhod3	3070	-0.356138	0.131657	-2.70505	0.00682934	0.194467
Foxc2	25.2393	2.35802	0.872145	2.7037	0.00685717	0.194874
Mcm6	268.959	0.588436	0.217752	2.70232	0.00688575	0.195042
Nktr	2139.05	-0.293399	0.108582	-2.7021	0.00689022	0.195042
Slc6a17	21878.2	-0.408233	0.151136	-2.70109	0.00691118	0.195251
Celsr1	262.384	-0.726156	0.26895	-2.69997	0.00693462	0.195529
Ptprm	598.831	0.396715	0.147243	2.69428	0.00705401	0.198506
Tgfbr2	720.273	0.469396	0.17445	2.69072	0.00712983	0.200248
Dlg4	6447.31	-0.360936	0.13427	-2.68813	0.00718529	0.201412
Dusp5	365.752	-0.767066	0.285649	-2.68534	0.0072455	0.202705
Glce	952.242	-0.378431	0.140998	-2.68394	0.00727604	0.203164
Ehbp1l1	566.368	0.612546	0.228371	2.68224	0.00731306	0.203802
Lyn	469.438	0.560899	0.209178	2.68144	0.00733064	0.203897
Rap1gap2	5919.06	-0.336613	0.125727	-2.67733	0.00742113	0.206015
Cbfa2t3	379.737	0.512413	0.19158	2.67467	0.00748025	0.207256
Lasp1	2038.75	0.430515	0.161055	2.67309	0.00751564	0.207836
Adgra2	258.149	0.648812	0.24285	2.67166	0.00754782	0.208326
Tspo	233.119	0.741343	0.277633	2.67022	0.00758008	0.208815
Tln1	1712.75	0.426406	0.159847	2.66759	0.00763975	0.210057
Cgref1	646.534	-0.419188	0.157516	-2.66124	0.00778546	0.213654
Fyb1	77.6411	0.947909	0.356506	2.65889	0.00783989	0.214648
Plppr2	2526.72	-0.339159	0.127581	-2.65839	0.0078515	0.214648
Ackr1	232.112	0.678616	0.255841	2.65249	0.00798997	0.217675
Stab1	135.13	0.849703	0.320354	2.65239	0.00799253	0.217675
Cd33	89.7949	0.688887	0.260197	2.64756	0.00810748	0.220368
Dnal1	1264.53	-0.366348	0.138404	-2.64695	0.00812203	0.220368
Slc37a2	167.023	0.902878	0.341272	2.64562	0.00815405	0.22082
Mitf	214.623	0.837279	0.316831	2.64267	0.0082256	0.222051
Pgpep1	109.058	0.615454	0.232938	2.64213	0.0082386	0.222051
Polq	42.2607	-1.03302	0.391023	-2.64183	0.00824583	0.222051
Apod	1296.49	0.65506	0.24828	2.63839	0.00833016	0.223902
Tlr4	82.723	0.75722	0.287147	2.63705	0.00836316	0.22437
Lhfpl4	1542.08	-0.331794	0.125941	-2.63452	0.00842554	0.225622
Acap3	1490.11	-0.314798	0.119887	-2.62579	0.00864476	0.227817
Aloxe3	403.394	-0.700358	0.267066	-2.62242	0.00873084	0.227817
Calcoco1	854.469	0.396052	0.15101	2.62269	0.00872378	0.227817
Cep295	593.492	-0.388284	0.147888	-2.62553	0.00865134	0.227817
Clec7a	130.127	1.03263	0.393914	2.62147	0.0087552	0.227817
Grip2	436.887	-0.859148	0.32762	-2.62239	0.0087315	0.227817
Grm1	167.321	0.68109	0.259379	2.62585	0.00864338	0.227817
Lrfn2	462.24	-0.447207	0.170685	-2.62007	0.00879114	0.227817
Mat2b	1721.42	-0.30116	0.114778	-2.62384	0.00869456	0.227817
Mrtfa	1075.75	-0.349067	0.132888	-2.62678	0.0086196	0.227817
Plekha7	328.489	-0.571363	0.218076	-2.62001	0.00879267	0.227817
Pnck	199.494	-0.554494	0.211013	-2.62777	0.00859463	0.227817
Prrx2	12.4788	2.27502	0.865801	2.62765	0.00859777	0.227817
Sft2d2	196.523	0.608796	0.232158	2.62233	0.00873305	0.227817
Sod2	5204.67	0.483521	0.18447	2.62114	0.00876371	0.227817
Tek	569.062	0.625861	0.238003	2.62964	0.00854762	0.227817
Tmem108	428.191	-0.679524	0.258691	-2.62678	0.00861981	0.227817
Tmem125	130.875	1.18732	0.452095	2.62627	0.00863265	0.227817
Lrrc73	168.305	-0.557843	0.213124	-2.61746	0.00885872	0.228762
Mxra8	72.6262	1.07402	0.410344	2.61737	0.00886095	0.228762
Col7a1	385.167	0.964876	0.368813	2.61616	0.00889242	0.229163
Ecscr	117.902	0.917911	0.351052	2.61474	0.00892948	0.229296
Itga4	46.2505	0.956625	0.36582	2.61501	0.0089224	0.229296
Hax1	790.989	-0.300859	0.1151	-2.61389	0.00895185	0.229461
Cnr1	4791.82	-0.282474	0.10815	-2.61187	0.00900485	0.229592
Ehd3	2938.79	-0.399101	0.152788	-2.61212	0.0089982	0.229592
Unc13d	46.6683	1.02635	0.392832	2.6127	0.00898298	0.229592
Nppa	281.014	-0.76668	0.293732	-2.61014	0.00905056	0.230349
Rspo3	185.848	0.553521	0.212172	2.60883	0.0090852	0.230822
Mthfd1l	505.059	-0.413587	0.158649	-2.60694	0.00913564	0.231694
RT1-M10-1	987.451	-0.332499	0.12764	-2.60497	0.00918829	0.232032
St3gal5	1218.62	-0.390316	0.149855	-2.60463	0.00919739	0.232032
Ywhah	16848.9	-0.30243	0.116088	-2.60518	0.00918252	0.232032
Gvin1	19.7086	1.56055	0.599576	2.60275	0.00924781	0.232896
Vav1	99.3785	0.825531	0.31752	2.59993	0.00932415	0.234408
Rgs14	221.247	-0.539959	0.207753	-2.59905	0.00934823	0.234603
Eppk1	8.00251	2.6764	1.03014	2.59809	0.00937438	0.234849
Ntrk2	6557.79	-0.339047	0.13062	-2.59567	0.00944069	0.236099
Frmpd1	677.938	0.783874	0.302382	2.59233	0.00953282	0.237989
Ctsz	719.203	0.575218	0.222135	2.5895	0.00961155	0.2383
Cxcl16	698.333	0.623657	0.240794	2.59	0.00959759	0.2383
Lmo4	2212.37	-0.44262	0.170873	-2.59035	0.00958795	0.2383
Pak6	1290.74	-0.616989	0.238147	-2.59079	0.00957557	0.2383
Utp18	809.046	-0.378858	0.146483	-2.58636	0.0096996	0.240069
Ifi47	62.1447	0.832858	0.322201	2.5849	0.0097407	0.240672
Rasa1	2406.43	-0.590024	0.228313	-2.58428	0.00975827	0.240693
Mob1a	785.646	0.418761	0.162211	2.58158	0.00983495	0.241984
Smarcd1	1410.62	-0.304074	0.117801	-2.58125	0.00984428	0.241984
Emp1	940	0.65291	0.25307	2.57996	0.00988118	0.242064
Grip1	1371.23	-0.525023	0.2035	-2.57997	0.00988099	0.242064
Tnfrsf26	81.3128	0.933224	0.361809	2.57933	0.00989928	0.242095
Crybg1	35.371	1.01367	0.393094	2.5787	0.00991736	0.242125
Arhgdib	314.801	0.704632	0.273711	2.57437	0.0100424	0.244185
F2rl1	88.1185	0.819914	0.318535	2.57401	0.0100527	0.244185
Pld5	98.9561	-1.08225	0.420331	-2.57475	0.0100312	0.244185
Satb1	512.798	0.4309	0.167464	2.57309	0.0100794	0.244422
Iffo1	1588.81	-0.483947	0.188127	-2.57245	0.0100983	0.244466
Prpsap1	387.449	0.403046	0.157028	2.56672	0.0102666	0.247504
Ptpn14	45.9019	0.933323	0.363667	2.56642	0.0102754	0.247504
Rab11fip4	1733.49	-0.353728	0.137809	-2.56679	0.0102644	0.247504
Ttc14	1277.75	-0.316259	0.12339	-2.56308	0.0103749	0.249484
Gpr35	7.80903	2.68222	1.04704	2.56171	0.0104157	0.250046
Rtf1	1510.96	-0.262308	0.102552	-2.55781	0.0105333	0.252027
Shc1	627.609	0.552167	0.215872	2.55785	0.0105323	0.252027
Zfp36l1	918.989	0.446844	0.174773	2.55672	0.0105665	0.252402
Lmcd1	260.239	-0.623243	0.243976	-2.55452	0.0106334	0.253579
Clec14a	249.047	1.04457	0.409118	2.55323	0.0106729	0.253681
Pid1	601.446	0.356131	0.139479	2.5533	0.0106708	0.253681
Slfn13	329.191	0.602998	0.236292	2.55191	0.0107133	0.25422
Elfn1	326.144	-0.526016	0.206185	-2.55118	0.0107359	0.254336
Myadm	2004.53	-0.315577	0.123812	-2.54883	0.0108084	0.255634
Cdh5	549.06	0.64299	0.252526	2.54624	0.0108891	0.25712
Ints6	775.616	-0.338107	0.132869	-2.54466	0.0109385	0.257862
Knl1	60.8284	0.989358	0.389087	2.54277	0.0109978	0.258836
Gnl1	1321.54	-0.309513	0.121942	-2.53819	0.0111428	0.26182
Dip2c	1641.47	-0.346135	0.13645	-2.53673	0.0111894	0.262301
Parva	305.948	0.515495	0.203239	2.5364	0.0111998	0.262301
Calhm2	34.6014	1.24504	0.491502	2.53313	0.0113049	0.26305
Cp	875.57	1.45829	0.575593	2.53354	0.0112917	0.26305
Itgb7	23.1758	1.79457	0.707982	2.53477	0.0112521	0.26305
Ptx3	686.806	0.638115	0.251896	2.53325	0.0113012	0.26305
Cbx7	378.177	0.509288	0.201394	2.52881	0.011445	0.265025
Itgb3	61.8549	1.16044	0.458889	2.52881	0.0114451	0.265025
Rasgef1c	436.706	-0.492118	0.194519	-2.52993	0.0114087	0.265025
AABR07058254.1	2.48197	4.6687	1.84706	2.52765	0.011483	0.265049
Cnga4	8.72499	-2.2012	0.870673	-2.52816	0.0114662	0.265049
Il1b	91.9509	1.52649	0.604244	2.52628	0.0115277	0.265654
Cchcr1	95.4083	0.728787	0.288611	2.52515	0.0115648	0.266082
Pcdh10	2449.25	-0.475292	0.188285	-2.52432	0.0115923	0.26629
Fkbp2	825.429	-0.297484	0.117945	-2.52222	0.0116616	0.267029
Skap1	18.9172	1.85393	0.734992	2.52238	0.0116564	0.267029
St3gal1	866.964	0.438123	0.173912	2.51922	0.0117616	0.26889
Kcnma1	2069.91	-0.430987	0.17137	-2.51495	0.0119049	0.269595
Man2a1	584.077	0.410263	0.163115	2.51517	0.0118973	0.269595
P4htm	910.65	-0.364757	0.144985	-2.51582	0.0118755	0.269595
Samd4b	679.663	-0.301716	0.119867	-2.51709	0.0118329	0.269595
Sgsm2	1336.2	-0.388621	0.154467	-2.51588	0.0118734	0.269595
Siah3	75.3928	-0.872166	0.34672	-2.51548	0.0118872	0.269595
Amd1	1665.62	-0.54968	0.218859	-2.51157	0.0120196	0.271337
Eif2ak2	603.97	0.385887	0.153627	2.51184	0.0120103	0.271337
Gipr	517.502	-0.443949	0.177001	-2.50817	0.0121359	0.273534
Ccdc9b	101.551	0.706732	0.281869	2.50731	0.0121655	0.273771
Colgalt2	253.811	-0.595108	0.237764	-2.50293	0.012317	0.274291
Itgam	1174.68	0.519397	0.207481	2.50335	0.0123024	0.274291
Itpka	439.217	-0.534669	0.213406	-2.50541	0.0122308	0.274291
Pcgf6	224.923	-0.519609	0.20751	-2.50402	0.0122791	0.274291
Serping1	254.364	0.758019	0.30287	2.50278	0.0123221	0.274291
Slc25a32	372.168	-0.414515	0.165614	-2.50289	0.0123183	0.274291
Tnfrsf19	232.95	-0.731477	0.292186	-2.50347	0.0122983	0.274291
Azin1	5899.98	-0.383112	0.153121	-2.50201	0.0123489	0.274463
Rin1	556.922	-0.526832	0.210753	-2.49975	0.012428	0.275794
Septin5	9453.03	-0.398023	0.159286	-2.4988	0.0124615	0.276112
Camk2n1	3598.7	-0.621009	0.248933	-2.49468	0.012607	0.278214
Radil	156.761	-0.621898	0.249311	-2.49447	0.0126145	0.278214
Spns2	1155.92	-0.644372	0.258296	-2.49471	0.0126061	0.278214
Borcs5	270.135	-0.556725	0.223345	-2.49267	0.0126786	0.278348
Ctsb	9746.46	0.345135	0.138433	2.49315	0.0126616	0.278348
Fmod	22.2822	1.90952	0.765862	2.49329	0.0126565	0.278348
Nhsl1	230.92	0.5186	0.208247	2.49031	0.0127632	0.279778
Asap3	103.091	0.857288	0.344406	2.48918	0.0128038	0.280242
Cfp	59.1247	1.14516	0.460628	2.48608	0.012916	0.282268
Tagln2	1422.82	0.42987	0.172963	2.48534	0.012943	0.282427
Fcgr2b	426.675	0.707843	0.285042	2.4833	0.0130172	0.282672
Rassf5	986.533	-0.45134	0.181683	-2.48421	0.012984	0.282672
Rbm39	5702.4	-0.27427	0.110465	-2.48287	0.0130328	0.282672
Tmem132b	1274.85	-0.267632	0.107779	-2.48315	0.0130226	0.282672
Samd9	807.828	0.589625	0.237563	2.48198	0.0130656	0.282958
Ntng1	82.6676	0.984798	0.396969	2.48079	0.0131091	0.283471
Ell3	128.36	-0.776861	0.313245	-2.48005	0.0131366	0.28364
Kcna1	5304.95	-0.369088	0.148924	-2.47836	0.0131987	0.284553
Asic2	391.359	-0.395005	0.159522	-2.47618	0.0132797	0.285206
Hyal3	1025.01	-0.35751	0.144393	-2.47594	0.0132885	0.285206
Polr2c	754.083	-0.331503	0.133856	-2.47656	0.0132657	0.285206
Trank1	5193.81	-0.389781	0.157576	-2.4736	0.0133759	0.286654
Dcdc2c	32.2724	1.22974	0.497505	2.47182	0.0134426	0.287229
Pcdh11x	86.1997	-0.646959	0.261699	-2.47215	0.0134304	0.287229
Pkdcc	108.976	-0.561047	0.227197	-2.46943	0.0135329	0.288729
Avpi1	267.797	-0.526926	0.213427	-2.46889	0.0135533	0.288736
Hist2h3c2	13.9895	1.68928	0.684581	2.46761	0.0136019	0.289342
Ccl11	2.48862	4.67213	1.89611	2.46407	0.0137371	0.290567
Grb10	1559.39	-0.397302	0.161191	-2.46479	0.0137093	0.290567
Lamc1	2748.53	0.422161	0.171333	2.46398	0.0137403	0.290567
Rtn4rl2	538.768	-0.826756	0.335357	-2.4653	0.0136898	0.290567
Hspa12b	188.927	0.900873	0.366025	2.46123	0.0138461	0.292373
Cdca8	37.3187	0.998524	0.406094	2.45885	0.0139383	0.29324
Pdzd7	224.754	0.455793	0.185338	2.45925	0.0139226	0.29324
Postn	286.516	1.14254	0.464712	2.45859	0.0139483	0.29324
Anp32e	4332.08	-0.276559	0.112734	-2.4532	0.0141591	0.295038
Col3a1	534.454	2.34732	0.956244	2.45473	0.014099	0.295038
Kctd13	752.267	-0.369589	0.150648	-2.45333	0.0141541	0.295038
Klra17	2.60249	4.73894	1.9321	2.45274	0.0141774	0.295038
Map3k8	77.3033	0.658427	0.268372	2.45341	0.0141509	0.295038
Prr3	600.11	-0.313857	0.1278	-2.45586	0.0140549	0.295038
Tbc1d4	177.463	0.498822	0.203205	2.45478	0.0140972	0.295038
Slc66a3	71.2536	0.971688	0.3966	2.45005	0.0142838	0.296821
Vat1	973.103	0.424229	0.173347	2.44729	0.0143936	0.298673
Lingo2	507.905	-0.543873	0.222493	-2.44445	0.0145073	0.300599
Elk3	330.31	0.549239	0.224952	2.44159	0.0146229	0.302202
Tpm1	5828.7	-0.431219	0.176621	-2.44149	0.0146268	0.302202
Acvr1c	214.142	-0.875193	0.359066	-2.43741	0.0147927	0.303655
Adamts4	853.371	0.766525	0.31478	2.43511	0.0148871	0.303655
Dynll2	5372.6	-0.283306	0.116313	-2.43572	0.0148621	0.303655
Hmga1	1490.02	-0.534378	0.21914	-2.43852	0.0147474	0.303655
Nol3	451.434	0.567735	0.23314	2.43517	0.0148848	0.303655
Pck2	198.626	0.435666	0.178784	2.43684	0.0148163	0.303655
Sash3	44.3806	0.948168	0.389365	2.43517	0.0148849	0.303655
Tnip1	832.914	0.372275	0.152751	2.43714	0.0148041	0.303655
Unc93b1	136.01	0.640046	0.262794	2.43554	0.0148695	0.303655
Stac	18.7586	-1.72846	0.71049	-2.43277	0.0149837	0.305193
Ranbp3l	56.4141	1.83367	0.754317	2.4309	0.0150612	0.306338
Plbd1	11.7033	2.1525	0.886274	2.42871	0.0151526	0.307761
Clstn3	4762.16	-0.463531	0.190992	-2.42697	0.0152254	0.307935
Frmd5	828.14	-0.344963	0.142134	-2.42702	0.0152234	0.307935
Ggta1	297.843	0.53643	0.220976	2.42755	0.0152013	0.307935
Tapbp	234.611	0.614439	0.25323	2.4264	0.0152494	0.307986
Tcn2	216.815	0.714765	0.29474	2.42507	0.0153054	0.308684
Itpr1	9359.13	-0.414347	0.171151	-2.42095	0.0154801	0.311769
Klhl7	1572.65	-0.329601	0.136185	-2.42025	0.0155099	0.311934
Ptbp3	830.384	0.340946	0.140926	2.41932	0.0155496	0.312295
Itga3	486.982	0.416108	0.172069	2.41826	0.015595	0.31277
Fam174a	402.746	-0.37342	0.154511	-2.41679	0.0156579	0.31339
Jazf1	307.03	-0.423797	0.175375	-2.41652	0.0156695	0.31339
Cnih3	314.759	-0.474371	0.196439	-2.41486	0.0157414	0.31439
C1r	286.775	0.984384	0.408089	2.41218	0.0158574	0.316256
Eipr1	1232.33	-0.331776	0.13757	-2.41169	0.0158788	0.316256
Prcp	284.928	0.45252	0.187758	2.41012	0.0159472	0.31718
Scn11a	14.0948	-1.91293	0.794725	-2.40703	0.0160827	0.319433
Psmb9	55.4946	0.784624	0.326271	2.40482	0.0161803	0.320928
Rgs16	669.649	0.579526	0.241116	2.40352	0.0162382	0.321633
Rgs18	12.8885	1.92907	0.803159	2.40185	0.0163126	0.322661
Itpripl2	347.087	0.535645	0.223214	2.39969	0.016409	0.323678
Nacc2	225.826	0.418238	0.174285	2.39973	0.0164072	0.323678
Ptk7	231.959	0.760542	0.317016	2.39906	0.016437	0.323786
Sdk1	123.104	0.756441	0.315376	2.39854	0.0164607	0.323809
Tmem106a	31.3525	1.00924	0.421364	2.39516	0.0166129	0.326358
Ginm1	369.914	0.396285	0.165555	2.39367	0.0166806	0.327241
Akna	179.772	0.609948	0.255087	2.39114	0.0167963	0.327277
Il1rn	340.008	0.977956	0.408922	2.39155	0.0167775	0.327277
Nnat	1467.3	-0.649414	0.271582	-2.39123	0.0167921	0.327277
Sufu	254.187	0.480629	0.200913	2.39222	0.0167466	0.327277
Syp	14679.5	-0.261378	0.109236	-2.39278	0.0167213	0.327277
Nt5dc3	2821.52	-0.329969	0.138067	-2.38992	0.0168522	0.32748
Spp1	7242.52	1.9452	0.813913	2.38994	0.0168513	0.32748
Fabp7	879.646	-0.47137	0.197367	-2.3883	0.0169265	0.327647
Ier3	382.139	0.427117	0.178797	2.38884	0.0169016	0.327647
Zfr	7974.55	-0.313761	0.131377	-2.38824	0.0169292	0.327647
Rufy1	543.946	0.403009	0.169071	2.38367	0.0171411	0.331303
Bdh1	409.617	-0.48154	0.202134	-2.38228	0.0172057	0.33166
Sgsh	69.9744	0.752325	0.315791	2.38235	0.0172025	0.33166
Api5	3098.94	-0.375502	0.157834	-2.37909	0.0173552	0.334094
Matk	443.381	-0.451099	0.189755	-2.37727	0.0174414	0.334464
Rab40c	317.509	-0.367168	0.154544	-2.37581	0.0175104	0.334464
Rasgrp3	164.6	0.797264	0.335586	2.37574	0.017514	0.334464
Tmem223	84.4781	0.605357	0.254746	2.37632	0.0174864	0.334464
Ttyh1	6093.36	-0.316641	0.133209	-2.37702	0.017453	0.334464
Wsb2	2837.72	-0.23675	0.0996018	-2.37696	0.0174558	0.334464
Cadm1	2474.7	-0.281841	0.118659	-2.37522	0.0175387	0.334492
Cbfb	630.549	0.313529	0.132031	2.37466	0.0175651	0.334539
Tfpi2	153.849	0.946971	0.398861	2.37419	0.0175877	0.334539
Dusp6	1410.42	-0.676794	0.285517	-2.37042	0.0177681	0.337078
Il18	68.9642	0.96804	0.408335	2.3707	0.0177545	0.337078
Arhgap11a	98.693	0.731753	0.309176	2.36679	0.0179433	0.337824
Fam20a	14.6846	1.95955	0.827972	2.36668	0.0179484	0.337824
Ppm1e	2364.41	-0.432092	0.182444	-2.36836	0.0178671	0.337824
Rbp1	156.573	0.90728	0.383333	2.36682	0.0179418	0.337824
Samhd1	88.259	0.693075	0.292692	2.36793	0.017888	0.337824
Tmem266	35.1421	-1.24221	0.524855	-2.36676	0.0179445	0.337824
Nfkb2	177.664	0.894215	0.37808	2.36515	0.018023	0.338775
Tox2	205.638	-0.466634	0.197336	-2.36467	0.018046	0.338775
Lig1	328.934	0.453935	0.192044	2.36371	0.0180931	0.339216
Bmp6	235.073	0.900697	0.381135	2.3632	0.018118	0.339241
Tmem178a	807.367	-0.529686	0.2243	-2.3615	0.018201	0.340351
Catip	18.4379	1.29385	0.548625	2.35834	0.0183567	0.341543
Hook1	1548.46	-0.337397	0.143068	-2.3583	0.018359	0.341543
Insig1	3103.07	-0.423145	0.179429	-2.35828	0.0183597	0.341543
Wipf1	615.315	0.462828	0.196245	2.35842	0.0183528	0.341543
Galnt2	1601.13	-0.301431	0.127892	-2.35692	0.0184271	0.341678
Pde1a	920.234	0.708075	0.300452	2.3567	0.0184382	0.341678
Slc35f4	199.509	-0.489392	0.207598	-2.3574	0.0184034	0.341678
Baalc	4571.79	-0.5152	0.218911	-2.35346	0.0185994	0.343896
Ltbp2	80.0978	1.11887	0.475438	2.35334	0.0186058	0.343896
Kcna4	442.376	-0.543893	0.231516	-2.34926	0.0188107	0.346792
Odf2	1052.96	-0.319628	0.136047	-2.34938	0.0188045	0.346792
Iqsec3	3103.02	-0.274267	0.116814	-2.34789	0.01888	0.347623
Ifih1	142.081	0.603286	0.257127	2.34625	0.0189632	0.347819
MAST1	1555.21	-0.419802	0.178859	-2.34711	0.0189197	0.347819
Rundc3b	882.082	-0.336065	0.143218	-2.34653	0.0189491	0.347819
Dram1	76.1201	0.719656	0.307102	2.34337	0.0191102	0.350008
Sergef	844.564	-0.28822	0.123017	-2.34293	0.0191328	0.350008
Tlr2	201.903	0.786123	0.335593	2.34249	0.0191555	0.350008
Sult2b1	58.6323	0.969422	0.414047	2.34133	0.019215	0.35065
Stk25	2019.56	-0.287594	0.122889	-2.34027	0.0192696	0.351201
Pola2	56.3879	0.84873	0.362884	2.33884	0.0193436	0.352025
Rhbdf2	118.145	0.871179	0.372545	2.33845	0.0193638	0.352025
Lilrb2	13.6594	1.78825	0.764889	2.33793	0.0193911	0.352076
Emb	466.695	0.417961	0.178873	2.33663	0.0194582	0.352849
Abi3bp	749.608	-0.755399	0.323623	-2.3342	0.0195854	0.352929
Arhgap12	680.136	0.34982	0.149811	2.33508	0.019539	0.352929
Kcnc4	313.155	0.475687	0.203738	2.3348	0.0195539	0.352929
Tmem94	1239.39	-0.298398	0.127815	-2.33461	0.0195639	0.352929
Unc13b	545.759	-0.351161	0.150354	-2.33556	0.0195142	0.352929
Brsk1	3174.17	-0.267945	0.115125	-2.32744	0.019942	0.353551
Edem1	1088.25	0.429488	0.18446	2.32836	0.0198932	0.353551
Fam114a1	213.139	0.557118	0.239495	2.32622	0.0200069	0.353551
Gbp5	39.8474	0.989312	0.425236	2.3265	0.0199919	0.353551
Gpr153	488.033	-0.606619	0.260771	-2.32626	0.0200049	0.353551
Grik2	338.288	0.419263	0.179953	2.32985	0.019814	0.353551
Itgav	2744.21	-0.381367	0.163506	-2.33244	0.0196776	0.353551
Klc4	211.097	0.464271	0.19923	2.33032	0.019789	0.353551
Mapk8ip1	5475.52	-0.282031	0.121139	-2.32816	0.0199035	0.353551
Mgst1	61.2325	0.699521	0.300727	2.3261	0.0200132	0.353551
Mob3c	115.706	0.624153	0.267921	2.32961	0.0198268	0.353551
Nckap1l	235.193	0.579094	0.248931	2.32632	0.0200013	0.353551
Neurod6	142.296	0.711239	0.305751	2.3262	0.0200078	0.353551
Svep1	143.22	0.510014	0.218639	2.33268	0.019665	0.353551
Thbd	644.281	0.552493	0.237239	2.32885	0.019867	0.353551
Tmem200a	357.643	-0.559182	0.239896	-2.33093	0.0197568	0.353551
Cd109	26.7322	1.02081	0.439667	2.32178	0.020245	0.353922
Elf1	303.895	0.394337	0.169858	2.32158	0.0202558	0.353922
Mdga2	269.873	-0.508176	0.218762	-2.32297	0.0201809	0.353922
Pfdn2	1622.18	-0.245061	0.105445	-2.32406	0.0201221	0.353922
Pgr	143.962	-0.54927	0.236498	-2.32252	0.0202051	0.353922
Prom1	110.575	0.568943	0.245005	2.32217	0.020224	0.353922
Sbf1	3367.16	-0.270285	0.11632	-2.32363	0.0201451	0.353922
Slc25a48	19.9133	1.32744	0.571573	2.32244	0.0202091	0.353922
Syt2	157.921	0.810878	0.349103	2.32274	0.0201929	0.353922
Spty2d1	747.816	-0.347973	0.150024	-2.31945	0.0203706	0.355496
Foxq1	19.0793	1.31775	0.568545	2.31776	0.0204621	0.356661
Slamf6	4.65342	3.58605	1.54862	2.31564	0.0205777	0.358241
RGD1566085	272.893	-0.426247	0.184141	-2.31479	0.0206244	0.358619
Gabra2	763.846	-0.387997	0.167827	-2.31189	0.0207838	0.360174
Nus1	2139.37	-0.308545	0.133466	-2.3118	0.0207889	0.360174
Ptprcap	3.24901	4.01517	1.73642	2.31233	0.0207595	0.360174
Dtx3l	162.684	0.473182	0.204899	2.30934	0.0209248	0.361638
S100a8	49.4003	1.77949	0.770708	2.30891	0.0209488	0.361638
Tm2d2	825.166	-0.301374	0.130504	-2.30931	0.0209266	0.361638
Tcof1	461.052	0.339288	0.147167	2.30546	0.0211409	0.364516
Plac8	29.9632	1.80081	0.781348	2.30475	0.0211804	0.364759
Elmod1	1435.9	-0.415364	0.180319	-2.30349	0.0212511	0.365539
Syt13	2639.13	0.234442	0.101838	2.30212	0.0213286	0.366068
Trpm3	248.251	0.538571	0.233954	2.30204	0.0213328	0.366068
Cdk5r2	2346.04	-0.315228	0.137019	-2.30061	0.0214135	0.366578
Large1	2200.05	-0.500651	0.217599	-2.30079	0.0214033	0.366578
Id1	295.188	0.681642	0.296405	2.2997	0.0214655	0.367031
Btbd19	163.549	0.46648	0.202965	2.29833	0.0215431	0.367922
Col4a1	4446.79	0.613431	0.267313	2.29481	0.0217443	0.368245
Erap1	686.753	0.337738	0.147188	2.2946	0.0217563	0.368245
Hhex	38.7862	0.907634	0.395248	2.29637	0.0216549	0.368245
Kcnk10	464.302	-0.605911	0.264092	-2.29432	0.0217723	0.368245
Kcnn4	36.166	1.35392	0.590211	2.29396	0.0217925	0.368245
Pcdhb22	58.0785	0.981096	0.427594	2.29446	0.0217642	0.368245
Pde1b	922.658	-0.411246	0.179261	-2.29413	0.0217833	0.368245
Phactr1	2697.58	-0.283243	0.12336	-2.29606	0.0216722	0.368245
St6gal1	356.408	0.402991	0.175445	2.29697	0.0216205	0.368245
Smad6	42.7325	1.35706	0.59191	2.29267	0.0218667	0.369065
Alox15	17.3131	1.57887	0.688935	2.29175	0.0219201	0.369533
Plekhm3	902.694	0.354917	0.154909	2.29113	0.0219559	0.369702
Kcnk12	150.095	-0.515387	0.225012	-2.29048	0.0219934	0.3699
Ak4	538.697	-0.592071	0.25882	-2.28758	0.0221623	0.370428
Atl3	524.055	0.339577	0.148463	2.28728	0.0221793	0.370428
Dnase1l1	116.06	0.70501	0.307948	2.28938	0.0220573	0.370428
Fkbp1a	9046.83	-0.276868	0.121001	-2.28814	0.0221293	0.370428
Rarres2	509.815	-0.540051	0.235988	-2.28847	0.0221102	0.370428
Slco3a1	538.836	-0.371094	0.162214	-2.28768	0.0221559	0.370428
Gimap4	10.4949	1.8531	0.810518	2.28631	0.0222361	0.370945
Bcor	517.505	-0.492411	0.215432	-2.28569	0.0222727	0.371125
Far1	2321.47	-0.291214	0.127465	-2.28465	0.0223334	0.371276
Med29	327.564	-0.400607	0.175345	-2.28468	0.0223314	0.371276
Ociad2	1629.61	-0.533409	0.233786	-2.28161	0.0225126	0.373824
Aox4	13.3143	1.65069	0.723708	2.28088	0.0225553	0.3741
Ddx50	1031.46	-0.248955	0.109225	-2.27929	0.0226499	0.374561
Kansl1l	141.566	0.498783	0.218785	2.27978	0.0226206	0.374561
Tbc1d25	221.016	-0.402248	0.176494	-2.2791	0.0226612	0.374561
Cyth4	314.913	0.476975	0.209423	2.27757	0.0227522	0.375633
Bst2	95.4379	0.920984	0.404883	2.27469	0.0229246	0.37589
Igfbp4	434.178	0.765633	0.336286	2.27673	0.0228024	0.37589
Mansc1	76.2029	-0.786551	0.34571	-2.27518	0.0228952	0.37589
Pax1	749.368	-0.769048	0.338018	-2.27517	0.0228959	0.37589
Pnpla6	694.033	0.424171	0.186462	2.27483	0.0229159	0.37589
Septin2	3059.16	0.247372	0.108745	2.27478	0.0229189	0.37589
Ctsc	775.788	0.560891	0.246718	2.27341	0.0230017	0.376581
Pcdh1	3534.78	-0.306719	0.134933	-2.27312	0.0230191	0.376581
Lcn2	306.946	0.833727	0.366851	2.27266	0.0230468	0.376605
Hectd2	2119.17	-0.546706	0.2407	-2.27132	0.0231276	0.377175
Litaf	1257.85	0.448189	0.197335	2.27121	0.0231341	0.377175
Cavin3	347.155	-0.451573	0.199012	-2.26908	0.0232636	0.378655
Cybrd1	22.9943	1.15562	0.509631	2.26755	0.0233565	0.378655
Lss	876.92	-0.494007	0.217843	-2.26773	0.0233459	0.378655
Nt5c3a	771.501	-0.284511	0.125451	-2.2679	0.0233354	0.378655
Sh3glb1	983.376	0.338062	0.14905	2.26812	0.023322	0.378655
Acot3	30.7872	-1.32074	0.583036	-2.26527	0.0234958	0.380484
Ccl4	133.265	1.13517	0.50171	2.2626	0.0236606	0.381077
Emp2	102.952	0.691321	0.305477	2.26309	0.0236301	0.381077
Ros1	6.50876	-2.31644	1.02402	-2.2621	0.0236915	0.381077
S100a9	143.702	2.55365	1.12886	2.26215	0.0236881	0.381077
Slc1a3	10221.5	-0.325759	0.143972	-2.26265	0.0236573	0.381077
Tmem123	405.79	0.4911	0.21703	2.26282	0.0236468	0.381077
Egr3	1326.32	-0.64844	0.28683	-2.26071	0.0237771	0.381601
Txndc11	483.664	-0.375102	0.165911	-2.26086	0.023768	0.381601
Lsm12	744.392	-0.275252	0.121821	-2.25948	0.0238537	0.381661
Rfc3	78.8542	0.613896	0.271711	2.25937	0.0238604	0.381661
St8sia4	96.0355	0.547942	0.242452	2.26	0.023821	0.381661
Begain	792.821	-0.428215	0.189655	-2.25786	0.0239546	0.381892
Dele1	667.119	0.296095	0.131134	2.25795	0.0239487	0.381892
Gpsm3	50.486	0.869748	0.385093	2.25854	0.0239122	0.381892
Acp4	2.19202	4.48801	1.98889	2.25654	0.0240369	0.38278
Ak2	361.99	0.37286	0.165393	2.25439	0.024172	0.383656
Rasa2	586.091	-0.352766	0.156448	-2.25485	0.0241427	0.383656
Tbc1d32	87.8813	0.601845	0.266949	2.25453	0.0241626	0.383656
Hspb1	3529.77	-0.265159	0.117732	-2.25223	0.0243079	0.385389
Bmper	681.208	0.35897	0.159437	2.25149	0.0243547	0.385524
Dock8	277.66	0.449025	0.199456	2.25124	0.0243701	0.385524
Nptxr	20325.2	-0.469203	0.208477	-2.25062	0.0244095	0.385724
Tmem18	1397.06	-0.483141	0.214731	-2.24998	0.0244503	0.385944
Dop1b	1327.12	-0.278833	0.12409	-2.24701	0.0246391	0.388073
Nfib	378.99	0.487312	0.216836	2.24738	0.024616	0.388073
Ajap1	492.053	-0.440101	0.195942	-2.24608	0.024699	0.388165
Stxbp2	76.0861	0.685758	0.305307	2.24613	0.0246957	0.388165
C4b	79.0392	0.796993	0.355174	2.24395	0.0248357	0.38916
Gclm	381.219	0.383766	0.171018	2.24401	0.0248315	0.38916
Pbx2	574.935	0.446077	0.198802	2.24383	0.0248435	0.38916
Cystm1	773.429	-0.272848	0.121721	-2.24158	0.0249887	0.390279
Sdc4	1315.35	0.267988	0.11956	2.24146	0.0249963	0.390279
Slc5a1	72.7034	-0.948643	0.423226	-2.24146	0.0249963	0.390279
Ankdd1a	101.172	0.622557	0.277926	2.24001	0.02509	0.390962
Chek2	21.2134	1.1049	0.493454	2.23911	0.0251488	0.390962
Epop	199.811	-0.8495	0.379376	-2.23921	0.0251424	0.390962
Wls	607.956	0.338176	0.151015	2.23936	0.0251324	0.390962
Fcrla	3.29857	4.03548	1.80301	2.23819	0.0252085	0.391466
Chd2	1486.2	-0.265233	0.11857	-2.23693	0.025291	0.392058
Foxj3	1990.91	-0.258608	0.115617	-2.23677	0.0253011	0.392058
Vstm1	10.0155	1.90723	0.852867	2.23626	0.0253348	0.392158
Tomm20	3600.95	-0.29319	0.131132	-2.23583	0.0253628	0.392169
Apaf1	365.56	0.39682	0.177549	2.23499	0.0254181	0.392305
Ccnd1	353.005	0.350973	0.157055	2.23472	0.0254358	0.392305
Mrc2	148.054	0.82555	0.369521	2.23411	0.025476	0.392305
Plxnb2	1266.94	0.320298	0.143405	2.23351	0.025515	0.392305
Wdr12	955.837	-0.333152	0.149181	-2.23321	0.0255353	0.392305
Zic2	182.558	0.974965	0.436435	2.23393	0.0254877	0.392305
Tm4sf19	100.127	0.813889	0.364644	2.23201	0.0256143	0.393099
Dzank1	2553.65	-0.334292	0.149835	-2.23107	0.0256768	0.393638
Hydin	15.4458	-1.28456	0.576278	-2.22906	0.0258099	0.395258
Osgin2	485.237	0.384014	0.172329	2.22839	0.0258548	0.395523
Chrm3	324.768	-0.411134	0.184571	-2.22751	0.0259135	0.396
Plxnd1	412.688	0.499231	0.224509	2.22366	0.0261716	0.399519
Cenpj	169.333	0.437876	0.197043	2.22223	0.0262677	0.400562
Trim25	86.6705	0.639552	0.28794	2.22113	0.0263421	0.401271
Ap3m1	660.473	-0.279055	0.125674	-2.22047	0.0263867	0.401524
Ap3s1	1323.34	-0.31589	0.142338	-2.21929	0.026467	0.402103
Ephb6	2002.56	0.26003	0.1172	2.21868	0.0265086	0.402103
Fnbp1l	1933.7	0.290402	0.130873	2.21897	0.0264888	0.402103
Ccnb1	53.4547	0.846499	0.381785	2.21721	0.0266085	0.403193
Adgrb2	3634.98	-0.312497	0.140968	-2.21679	0.0266373	0.403204
Ccl9	35.7626	1.57593	0.711564	2.21474	0.0267782	0.403862
Mgat3	2220.08	-0.36192	0.163424	-2.21461	0.0267869	0.403862
Vps8	609.563	0.353864	0.159728	2.21541	0.0267319	0.403862
Yipf1	201.33	0.515577	0.232817	2.21452	0.0267931	0.403862
Birc3	123.863	0.96399	0.435574	2.21315	0.0268875	0.404014
Mboat7	2642.07	-0.244447	0.110441	-2.21337	0.0268723	0.404014
Trem1	48.9679	1.19324	0.539063	2.21354	0.0268607	0.404014
Arl4d	229.253	-0.547556	0.247662	-2.21091	0.0270423	0.405917
Crlf1	104.456	-0.58308	0.26379	-2.2104	0.0270776	0.406023
Nsmf	4679.84	-0.291039	0.131716	-2.2096	0.0271333	0.406434
Capzb	3313.76	-0.206124	0.0933504	-2.20807	0.0272392	0.407596
Trim5	271.283	0.360473	0.163329	2.20704	0.0273111	0.408247
Nadk	666.415	0.310076	0.140646	2.20465	0.027479	0.410241
Prp2l1	1090.77	-0.30211	0.137053	-2.20432	0.0275016	0.410241
Col4a2	2923.42	0.566092	0.257318	2.19997	0.0278093	0.412692
Gja5	50.0946	1.35439	0.615643	2.19997	0.0278093	0.412692
Tgm2	1184.38	0.598334	0.271839	2.20106	0.0277321	0.412692
Uaca	484.498	0.513631	0.23338	2.20083	0.0277478	0.412692
Vsig10	81.9911	0.701109	0.318601	2.20059	0.0277652	0.412692
Fbxl6	103.096	0.536522	0.243945	2.19935	0.0278527	0.412909
Atp7a	144.207	0.495489	0.225523	2.19706	0.0280159	0.414026
Nefh	1661.7	0.272346	0.123946	2.1973	0.027999	0.414026
Phyhd1	164.303	0.553479	0.251962	2.19668	0.0280432	0.414026
Rps6ka1	332.588	0.577784	0.262892	2.1978	0.0279637	0.414026
Tbl1xr1	1626.92	0.307557	0.140076	2.19564	0.0281174	0.414696
Cep170b	4225.9	-0.225637	0.102938	-2.19197	0.0283814	0.415298
Cxxc5	2093.31	-0.371109	0.169211	-2.19317	0.028295	0.415298
Itgae	45.1479	0.75007	0.342135	2.19232	0.0283563	0.415298
Mapk4	1176.41	-0.716097	0.326566	-2.19281	0.0283213	0.415298
Phf21b	49.1442	-0.785239	0.358242	-2.19193	0.0283848	0.415298
Slc2a8	383.664	-0.410397	0.187236	-2.19186	0.0283893	0.415298
Tnfrsf11a	156.749	0.899028	0.409976	2.19288	0.0283161	0.415298
Ttc19	1203.32	-0.329688	0.150372	-2.19248	0.0283447	0.415298
Irak3	187.647	0.683433	0.311868	2.19142	0.0284216	0.415348
Bace1	2637.92	-0.330646	0.151068	-2.18871	0.0286177	0.41652
Capns1	2426.33	0.358547	0.163742	2.1897	0.0285456	0.41652
Lmnb1	149.336	0.499981	0.228434	2.18874	0.028616	0.41652
Slfn2	328.099	0.448971	0.20512	2.18882	0.0286098	0.41652
Cd93	1270.76	0.66246	0.302862	2.18734	0.0287179	0.417534
Csf2rb	648.321	0.49006	0.224337	2.18448	0.0289267	0.417534
Frat1	206.166	-0.473511	0.216754	-2.18456	0.0289214	0.417534
Gadd45b	1126.16	-0.39979	0.182872	-2.18617	0.0288031	0.417534
Gpr176	358.828	-0.428401	0.196079	-2.18484	0.0289006	0.417534
Grin2c	228.859	-0.538442	0.24635	-2.18568	0.0288391	0.417534
Mmp10	2.89895	-5.07397	2.32305	-2.18419	0.0289487	0.417534
Poldip3	1350.99	-0.23874	0.109188	-2.18651	0.0287786	0.417534
Scimp	64.1586	0.973211	0.44554	2.18434	0.0289371	0.417534
Serpinb2	35.3771	-1.35638	0.62151	-2.18239	0.0290808	0.41902
Slitrk4	587.344	-0.402559	0.184529	-2.18155	0.0291427	0.419153
Tmem131l	193.761	-0.503222	0.23068	-2.18147	0.0291484	0.419153
Bex4	104.484	0.607241	0.278489	2.18049	0.0292213	0.419782
Wasf2	268.074	0.505431	0.231945	2.1791	0.0293243	0.420841
Cdk16	3723.22	-0.244333	0.112269	-2.17632	0.029531	0.420868
Esrrg	86.4852	0.799749	0.36746	2.17642	0.0295236	0.420868
Itpr2	563.96	0.35437	0.162793	2.17681	0.0294948	0.420868
Mmp15	290.662	0.332754	0.152779	2.178	0.0294059	0.420868
Rin2	543.237	0.414696	0.190451	2.17744	0.029448	0.420868
Trem3	9.20997	1.88723	0.866775	2.1773	0.029458	0.420868
Tspan32	2.2858	4.55211	2.09051	2.17751	0.0294423	0.420868
Ccnh	654.083	-0.263945	0.12139	-2.17435	0.0296789	0.422557
Bad	525.898	0.368376	0.169572	2.17239	0.0298264	0.422972
Mms22l	41.8358	0.819343	0.377223	2.17204	0.0298526	0.422972
Mrps36	437.692	-0.291337	0.134125	-2.17213	0.0298457	0.422972
Mtm1	626.971	-0.273276	0.125817	-2.17201	0.0298551	0.422972
Rab28	1045.11	-0.237714	0.109388	-2.17313	0.0297705	0.422972
Klhl26	374.97	-0.361864	0.166676	-2.17106	0.0299263	0.423564
Ctps2	457.906	0.325887	0.15028	2.16853	0.0301187	0.423955
Habp4	2076.13	-0.267931	0.123559	-2.16844	0.0301255	0.423955
Nectin4	58.473	0.753483	0.347489	2.16837	0.0301309	0.423955
Rhoc	1002.57	0.398394	0.18362	2.16966	0.0300323	0.423955
Susd6	1003.59	0.310346	0.143013	2.17005	0.0300034	0.423955
Zswim3	207.697	-0.401083	0.184952	-2.16858	0.0301145	0.423955
Adcy7	211.895	0.593634	0.274035	2.16627	0.0302907	0.424295
Bmp7	140.839	1.06971	0.493907	2.1658	0.0303261	0.424295
Casp1	77.5541	0.755214	0.348546	2.16675	0.0302536	0.424295
Cd226	3.76512	3.30811	1.52803	2.16496	0.0303911	0.424295
Naip5	95.1043	0.732848	0.338226	2.16674	0.0302547	0.424295
Nkx3-1	19.449	-1.2456	0.57515	-2.1657	0.0303343	0.424295
Rogdi	1414.83	-0.333058	0.153715	-2.16672	0.0302561	0.424295
Steap4	52.6981	0.945734	0.436762	2.16533	0.0303622	0.424295
Cntn2	1011.61	0.464607	0.21465	2.16449	0.0304269	0.424382
Cd81	356.58	0.464735	0.214753	2.16404	0.030461	0.424447
Map4k1	49.0773	0.745055	0.344627	2.16191	0.0306249	0.426317
Lrrc8b	1203.28	-0.461213	0.213608	-2.15915	0.0308383	0.428872
Ankrd44	334.726	0.490077	0.227112	2.15786	0.0309385	0.42985
Spi1	133.659	0.78471	0.363798	2.15699	0.0310062	0.430376
Plekha2	259.366	-0.584126	0.270941	-2.15591	0.0310905	0.43113
Gtse1	40.3148	0.866318	0.401975	2.15516	0.0311496	0.431303
Lpp	114.525	0.46817	0.21725	2.15499	0.031163	0.431303
Cyp4f5	45.8849	0.924766	0.429267	2.15429	0.0312173	0.431639
Bbs5	215.896	-0.40785	0.189411	-2.15325	0.031299	0.431938
Fes	88.5984	0.813274	0.37768	2.15334	0.031292	0.431938
Itga11	5.03406	3.07142	1.42748	2.15163	0.0314262	0.432863
Zfp292	1160.83	-0.245154	0.113927	-2.15185	0.0314094	0.432863
Agap3	2642.01	-0.25967	0.120736	-2.15072	0.0314981	0.433438
Acot6	18.5416	-1.4211	0.660909	-2.15023	0.0315373	0.433511
Hcn4	262.679	-0.983108	0.457655	-2.14814	0.0317025	0.433511
Hspbp1	779.13	-0.270359	0.125781	-2.14945	0.0315991	0.433511
Il17ra	818.524	0.254908	0.118684	2.14779	0.0317302	0.433511
Lrrtm2	897.01	0.527787	0.24555	2.1494	0.0316024	0.433511
Pold1	121.411	0.529959	0.246725	2.14798	0.0317157	0.433511
Ppm1k	583.375	-0.298559	0.139019	-2.14761	0.0317446	0.433511
Ubox5	240.051	-0.414083	0.192704	-2.14881	0.0316496	0.433511
Gng12	1308.94	0.379555	0.176895	2.14565	0.0319009	0.434408
Gramd1b	1051.44	-0.385148	0.179444	-2.14634	0.0318462	0.434408
Tuba1c	1075.01	0.386138	0.179944	2.14588	0.0318829	0.434408
Zfand6	551.959	0.333413	0.155421	2.14523	0.0319346	0.434456
Asxl3	129.152	-0.508937	0.237316	-2.14456	0.0319882	0.434773
Calcrl	296.214	0.502806	0.234601	2.14324	0.032094	0.43562
Lzts3	487.361	-0.601769	0.280803	-2.14302	0.0321111	0.43562
Kcnv1	430.627	-0.49088	0.229281	-2.14096	0.0322776	0.437466
Angpt1	43.4406	1.08058	0.505106	2.13932	0.0324097	0.438431
Card6	74.5254	0.81737	0.382056	2.1394	0.0324035	0.438431
Slc7a2	131.537	0.506563	0.23683	2.13893	0.0324416	0.438449
Ildr2	614.139	-0.504216	0.235873	-2.13766	0.0325446	0.439274
Specc1	957.957	0.321242	0.150294	2.13742	0.0325637	0.439274
Nans	490.909	0.299629	0.140258	2.13627	0.0326572	0.440122
Tmem130	4717.71	-0.255229	0.119536	-2.13515	0.0327484	0.440938
Cdca7	45.5655	0.938192	0.439561	2.13439	0.0328112	0.44137
Cavin4	52.7041	-1.10017	0.515701	-2.13336	0.0328955	0.44209
Dnhd1	514.852	-0.423407	0.198653	-2.13139	0.033057	0.442665
Mtch1	3301.55	-0.22979	0.107785	-2.13193	0.0330128	0.442665
Pax8	4.22976	2.80988	1.31837	2.13134	0.0330613	0.442665
Vgll3	42.5204	0.890138	0.417561	2.13176	0.0330268	0.442665
Serac1	566.978	-0.457664	0.214836	-2.13029	0.0331477	0.442996
Socs7	2289.72	-0.224356	0.105305	-2.13053	0.0331278	0.442996
Cpxm2	23.4269	1.36088	0.639815	2.12699	0.0334208	0.444992
Dlk2	94.3571	-0.762089	0.358172	-2.12772	0.0333606	0.444992
Rala	864.41	-0.26411	0.124144	-2.12744	0.0333836	0.444992
Tll1	1090.63	-0.551329	0.259175	-2.12725	0.0333997	0.444992
Casp9	588.898	-0.301856	0.141986	-2.12596	0.0335065	0.445503
Dsg1	21.3737	1.37776	0.648118	2.12579	0.0335211	0.445503
Omg	673.095	0.424652	0.199894	2.12438	0.0336381	0.446644
Wdsub1	195.995	-0.517195	0.243536	-2.12369	0.0336962	0.447003
Deptor	343.077	0.400361	0.188567	2.12317	0.0337395	0.447165
Zwint	24643.9	-0.479588	0.226093	-2.1212	0.0339047	0.448941
Plxdc2	218.333	0.415139	0.195744	2.12083	0.0339364	0.448947
Glt8d2	104.118	1.20507	0.568624	2.11928	0.0340666	0.450255
Cntn6	43.811	0.81182	0.383322	2.11785	0.0341876	0.451439
Ccr5	418.568	0.510281	0.241032	2.11707	0.0342537	0.451484
Slc25a42	544.259	-0.362703	0.171297	-2.1174	0.0342262	0.451484
Htr3a	69.8138	0.774588	0.36596	2.11659	0.0342943	0.451605
Foxk2	2019.68	-0.260675	0.123188	-2.11607	0.0343388	0.451777
Ikbip	214.278	0.480153	0.226998	2.11523	0.0344103	0.45189
Lyzl4	263.744	-0.374255	0.176915	-2.11544	0.0343921	0.45189
Slc25a24	244.949	0.536903	0.253884	2.11476	0.0344505	0.452006
Cacna2d1	1512.18	-0.368702	0.17463	-2.11133	0.0347436	0.453767
Casp12	41.183	0.909771	0.430628	2.11266	0.03463	0.453767
Klhl3	267.878	-0.465628	0.220582	-2.1109	0.0347805	0.453767
Maged2	243.367	0.372872	0.17655	2.11199	0.0346876	0.453767
Rbp4	111.896	0.513641	0.243285	2.11127	0.0347489	0.453767
Trim9	2384.15	-0.45315	0.214701	-2.11061	0.0348056	0.453767
Zxdc	454.923	-0.325267	0.154004	-2.11208	0.03468	0.453767
Pign	123.075	0.470292	0.223155	2.10747	0.035077	0.456714
Slc39a5	185.214	-0.395994	0.187919	-2.10726	0.0350952	0.456714
Cdc6	26.3672	0.994269	0.471986	2.10656	0.0351554	0.457083
Acod1	8.94543	2.04794	0.973623	2.10342	0.0354291	0.458302
C3ar1	139.13	0.86169	0.409661	2.10342	0.035429	0.458302
Ppard	644.941	-0.296165	0.140741	-2.10432	0.0353502	0.458302
Stt3a	910.11	0.282826	0.134402	2.10434	0.035349	0.458302
Zfp365	3760.82	-0.401692	0.190982	-2.10329	0.0354403	0.458302
Zpbp2	4.2115	-2.99137	1.42223	-2.1033	0.0354397	0.458302
Gpr3	150.262	-0.523983	0.249253	-2.10222	0.0355342	0.458691
Tbc1d14	2056.09	0.26534	0.126202	2.10251	0.0355091	0.458691
Ucn2	22.1288	1.17445	0.558904	2.10135	0.0356104	0.459262
Dsg3	12.9282	1.73955	0.828159	2.1005	0.0356851	0.459555
Rad9b	11.7324	-1.37196	0.653202	-2.10036	0.035697	0.459555
Mcam	1510.78	0.604423	0.288072	2.09816	0.0358907	0.461635
Zfp180	3830.79	-0.420205	0.200317	-2.0977	0.0359313	0.461744
Irs2	1504.53	-0.326378	0.155853	-2.09414	0.0362471	0.464843
Tlcd5	334.611	-0.398517	0.190356	-2.09353	0.0363017	0.464843
Tmem163	289.998	-0.605202	0.289074	-2.09359	0.0362966	0.464843
Tram2	35.612	0.950143	0.453735	2.09405	0.0362555	0.464843
Fxyd5	381.311	0.524703	0.25081	2.09204	0.0364352	0.465803
Nfatc3	320.816	0.34586	0.165342	2.09179	0.0364575	0.465803
Srgn	675.197	0.453405	0.216774	2.0916	0.0364739	0.465803
Lonp1	2261.91	-0.26369	0.126118	-2.09082	0.0365438	0.466282
Prkce	1519.52	-0.389446	0.186385	-2.08947	0.0366656	0.467422
Cacna1b	2062.04	-0.240197	0.115086	-2.0871	0.0368791	0.467622
Ccdc125	65.8172	0.651933	0.312401	2.08685	0.036902	0.467622
Crh	295.481	-0.44408	0.212837	-2.08648	0.0369349	0.467622
Diaph1	927.161	0.284336	0.136267	2.08661	0.0369237	0.467622
Elmo2	3042.74	-0.383477	0.183797	-2.08641	0.0369415	0.467622
Klhdc1	109.848	-0.49239	0.235898	-2.0873	0.0368607	0.467622
Stard4	664.681	-0.560772	0.268556	-2.0881	0.0367892	0.467622
Trhde	407.933	-0.483464	0.231459	-2.08877	0.0367283	0.467622
Elp6	181.854	-0.378005	0.181289	-2.0851	0.0370602	0.468031
Il13ra1	843.36	0.733374	0.351924	2.0839	0.0371691	0.468031
Jag1	237.724	0.429517	0.206096	2.08406	0.0371547	0.468031
Kansl2	1760.33	-0.296897	0.142437	-2.08442	0.0371221	0.468031
Pla2g6	188.627	0.425305	0.204037	2.08445	0.0371196	0.468031
Ybx3	1161.34	0.423212	0.203005	2.08473	0.0370936	0.468031
Nlrp1a	80.3163	0.709927	0.340795	2.08315	0.0372377	0.468485
Ch25h	238.573	0.723274	0.347411	2.0819	0.037352	0.469511
Gripap1	2139.85	-0.214645	0.103134	-2.08122	0.0374136	0.469875
Dennd2c	263.746	-0.613415	0.29494	-2.07979	0.0375445	0.470287
Lpar6	152.754	0.503116	0.241872	2.08009	0.0375169	0.470287
Mapk8	2445.33	-0.286403	0.137676	-2.08027	0.0375005	0.470287
Stat5b	649.663	-0.29804	0.14334	-2.07924	0.0375949	0.470508
Ctse	4.21275	2.82422	1.35897	2.07821	0.03769	0.471289
Fli1	107.11	0.715334	0.344429	2.07687	0.0378138	0.472426
Gabra4	443.516	-0.374764	0.180598	-2.07513	0.0379742	0.473608
Igf2r	1359.52	0.271486	0.130812	2.0754	0.0379494	0.473608
Prr13	752.655	0.329058	0.158601	2.07475	0.0380097	0.473639
Klrd1	1.85994	4.25263	2.05078	2.07367	0.0381103	0.474481
Adamts2	19.4281	1.08674	0.524195	2.07317	0.0381566	0.474647
Atp10d	252.955	0.50956	0.245879	2.0724	0.0382279	0.475122
Ssna1	211.681	-0.368585	0.177924	-2.07159	0.038304	0.475658
Gin1	176.422	-0.442844	0.213902	-2.07031	0.0384235	0.47673
Sav1	409.138	0.319146	0.154255	2.06895	0.0385511	0.477901
Inpp5d	336.749	0.476552	0.230408	2.0683	0.038612	0.478243
Hars1	1721.03	-0.240951	0.116546	-2.06742	0.0386944	0.478852
Arl16	500.564	-0.420716	0.203579	-2.0666	0.0387721	0.478988
Stx4	724.056	-0.277456	0.134242	-2.06683	0.0387499	0.478988
Clec4e	16.3075	2.09305	1.01332	2.06554	0.0388716	0.479594
Spen	1056.8	0.22219	0.107579	2.06537	0.0388878	0.479594
Racgap1	78.2994	0.763719	0.369932	2.06449	0.0389715	0.480214
Baz1a	437.393	0.403662	0.195623	2.06347	0.0390679	0.480578
H1f0	1837.42	0.297133	0.143988	2.06359	0.0390564	0.480578
Stc2	225.28	-0.76865	0.372716	-2.0623	0.0391796	0.48154
Fndc9	46.776	-0.853592	0.414077	-2.06143	0.0392621	0.481732
Stra6	54.9942	1.2175	0.590612	2.06143	0.0392622	0.481732
Clasrp	595.009	-0.427646	0.207674	-2.05922	0.0394729	0.481851
Cyb5r3	865.195	0.257552	0.125044	2.0597	0.0394272	0.481851
Gmppb	1830.35	0.219001	0.106337	2.0595	0.0394468	0.481851
Pcolce	47.7825	1.04528	0.50738	2.06014	0.0393849	0.481851
Ptprh	185.284	-0.401745	0.195055	-2.05966	0.0394313	0.481851
St8sia5	524.709	-0.380724	0.184887	-2.05922	0.0394729	0.481851
Psd4	89.6273	0.77051	0.374432	2.05781	0.0396084	0.483095
Fhod1	153.828	0.712324	0.346304	2.05693	0.0396926	0.483258
Slc41a1	1211.55	-0.347994	0.16918	-2.05694	0.0396918	0.483258
Utrn	1143.04	0.37362	0.181667	2.05662	0.0397226	0.483258
Dhps	817.114	-0.26915	0.130969	-2.05506	0.039873	0.483859
Ly9	9.54862	1.77482	0.863535	2.05529	0.039851	0.483859
Sh3bp1	165.683	-0.40872	0.19883	-2.05562	0.0398189	0.483859
Nags	25.8096	-1.13617	0.553128	-2.05408	0.0399675	0.484597
Gimap8	188.763	0.421284	0.205138	2.05366	0.0400082	0.484683
Ica1l	221.81	-0.491016	0.239135	-2.05331	0.040043	0.484695
Cyfip2	14079.5	-0.286349	0.139527	-2.05228	0.0401425	0.485084
RT1-CE15	12.6658	1.55834	0.759226	2.05253	0.040118	0.485084
Nxph1	348.733	0.320621	0.156283	2.05154	0.0402147	0.485548
Gtf2f1	1730.87	-0.252976	0.123371	-2.05053	0.0403123	0.486317
Setd1b	669.483	0.283458	0.138287	2.04978	0.0403864	0.486803
Lilrb1	4.88986	2.54364	1.24184	2.04828	0.040533	0.487928
Unc5d	101.856	0.495662	0.242008	2.04813	0.0405476	0.487928
Cpne3	404.448	0.314024	0.153383	2.04732	0.0406271	0.488476
Nmnat3	52.4597	-0.761305	0.371981	-2.04662	0.0406951	0.488885
Arl3	1136.33	-0.305645	0.149393	-2.04592	0.0407647	0.489312
Mlx	760.992	-0.256328	0.125359	-2.04475	0.0408794	0.490281
Slc31a2	165.225	0.434519	0.21255	2.04431	0.0409229	0.490393
Dagla	1415.47	-0.415463	0.203606	-2.04052	0.0412984	0.49243
Itpr3	182.174	0.571098	0.279824	2.04092	0.0412587	0.49243
Map2k1	5199.34	-0.274216	0.1343	-2.04181	0.0411701	0.49243
Marchf4	289.019	-0.383394	0.187865	-2.04079	0.0412713	0.49243
Mef2c	1791.01	0.211431	0.103553	2.04177	0.0411742	0.49243
Mmp19	130.484	0.575596	0.282001	2.04111	0.0412394	0.49243
Ahcyl1	4384.6	-0.209713	0.102827	-2.03947	0.0414034	0.492562
Nfil3	537.736	-0.483319	0.236984	-2.03946	0.0414043	0.492562
Rhog	574.421	0.421631	0.206764	2.03918	0.0414316	0.492562
Tor4a	134.765	0.51488	0.252511	2.03904	0.0414464	0.492562
C1s	181.786	0.678548	0.333428	2.03507	0.0418442	0.49416
Cdh22	661.34	-0.418067	0.20539	-2.03548	0.0418027	0.49416
Igsf9b	2048.28	-0.555869	0.273147	-2.03505	0.0418459	0.49416
Pfkp	10857.3	-0.252899	0.124239	-2.03558	0.0417924	0.49416
Sfmbt2	198.557	-0.6815	0.334725	-2.036	0.0417502	0.49416
Shank3	2277.42	-0.291981	0.143483	-2.03495	0.0418558	0.49416
Tgfb1i1	525.604	-0.331549	0.162879	-2.03556	0.0417947	0.49416
Zscan30	355.85	0.329425	0.161849	2.03538	0.0418124	0.49416
Inppl1	834.901	0.296537	0.145788	2.03403	0.0419489	0.494852
Krt222	180.712	0.450009	0.221384	2.0327	0.0420824	0.495614
Sh3gl2	2030.28	-0.424751	0.208937	-2.03292	0.0420609	0.495614
Tp53	584.592	0.310596	0.152842	2.03213	0.0421401	0.495888
Kdelr3	74.3686	0.839472	0.413241	2.03144	0.0422108	0.496314
Aldh3a2	655.396	0.323397	0.159396	2.02889	0.0424697	0.498543
Gsap	102.873	0.74159	0.365466	2.02916	0.0424418	0.498543
Necap1	2477.13	-0.236477	0.11659	-2.02827	0.0425322	0.498869
Cdip1	1786.52	-0.237131	0.117053	-2.02585	0.0427798	0.499379
Col19a1	752.102	0.428435	0.211465	2.02603	0.0427617	0.499379
Cyrib	3303.28	-0.229936	0.113428	-2.02716	0.0426462	0.499379
Gal3st3	158.37	-0.5673	0.279856	-2.02711	0.0426509	0.499379
Ifit2	107.489	0.597946	0.29517	2.02577	0.0427886	0.499379
Lsp1	491.315	0.419839	0.207418	2.02412	0.0429577	0.499379
Ntaq1	131.095	-0.415443	0.205125	-2.02532	0.0428349	0.499379
Ralgapb	2916.68	0.204393	0.100898	2.02574	0.0427909	0.499379
Soat1	706.526	0.381806	0.188576	2.02468	0.0429004	0.499379
Zc3h12d	11.1031	1.43276	0.707777	2.02431	0.0429385	0.499379
Zfp451	1280.44	-0.250207	0.123574	-2.02476	0.0428922	0.499379
Chrdl1	167.63	-0.533141	0.263749	-2.02139	0.0432392	0.501214
Mink1	4500.96	-0.232093	0.114865	-2.02057	0.0433239	0.501214
Ngef	2432.49	-0.328634	0.162639	-2.02063	0.0433178	0.501214
Pitpnm1	1366.15	-0.362733	0.179387	-2.02207	0.0431692	0.501214
Traip	18.3981	1.24369	0.615513	2.02057	0.0433247	0.501214
Zfp330	946.598	-0.23616	0.116864	-2.02082	0.0432985	0.501214
Gnptg	881.038	-0.262032	0.129833	-2.01823	0.0435678	0.503585
Mmrn2	293.065	0.614938	0.304739	2.01792	0.0435997	0.503585
Gabbr2	3954.07	-0.321011	0.159191	-2.01651	0.0437466	0.504877
Dact3	1030.35	-0.474891	0.235556	-2.01605	0.0437953	0.505033
Sap130	776.586	-0.232306	0.115306	-2.01469	0.0439376	0.505863
Steap2	281.137	0.609524	0.302533	2.01474	0.0439322	0.505863
Selplg	110.34	0.566607	0.281477	2.01298	0.0441168	0.50752
Rgs7bp	451.94	-0.367822	0.182852	-2.01159	0.0442632	0.508797
Kcnh4	104.274	-0.592915	0.29481	-2.01118	0.0443067	0.50889
Ppp1r12c	2150.13	-0.255339	0.126993	-2.01066	0.0443618	0.508922
Syde1	180.597	0.43707	0.217396	2.01048	0.0443802	0.508922
Cd244	14.3695	1.40858	0.700872	2.00975	0.0444572	0.509379
Myh9	5121.1	0.413391	0.205725	2.00944	0.044491	0.509379
Dnaaf11	70.6271	-0.669891	0.33347	-2.00885	0.0445531	0.509684
Zdhhc5	2115.82	-0.28235	0.140664	-2.00727	0.0447212	0.511201
Trib3	45.0766	0.790521	0.393948	2.00666	0.0447854	0.511528
Abi2	5492.6	-0.265325	0.132382	-2.00424	0.0450442	0.51164
Eya2	65.0902	1.29412	0.645254	2.00559	0.0448998	0.51164
Klhdc3	2420.53	-0.19413	0.0967956	-2.00557	0.0449024	0.51164
Lamb2	602.603	0.523049	0.260904	2.00476	0.0449888	0.51164
Lpl	215.485	0.92462	0.461111	2.0052	0.0449415	0.51164
Serpinb9	279.765	0.555148	0.276954	2.00448	0.0450189	0.51164
Thoc7	818.763	-0.292183	0.145766	-2.00447	0.0450203	0.51164
Cyp2u1	96.4531	0.486833	0.242981	2.00359	0.0451143	0.512031
Napsa	24.7975	1.66648	0.831986	2.00302	0.0451756	0.512323
Ada	32.8947	1.04662	0.522739	2.00218	0.0452657	0.512939
Mkrn3	13.0453	1.23917	0.619168	2.00134	0.0453554	0.513552
Sell	57.13	1.35689	0.678546	1.9997	0.0455322	0.514742
Zfp40	382.363	-0.328127	0.164082	-1.99978	0.0455243	0.514742
Pabir1	261.585	-0.349132	0.174716	-1.99828	0.0456863	0.515674
Syn1	4931.02	-0.294789	0.147513	-1.99839	0.0456742	0.515674
Rims3	320.223	-0.465152	0.232905	-1.99718	0.0458061	0.516216
Sh3pxd2a	428.914	0.372863	0.18668	1.99734	0.0457878	0.516216
Ampd2	558.209	-0.314176	0.157477	-1.99506	0.046036	0.516379
Cacnb1	2773.52	-0.253017	0.126726	-1.99656	0.0458727	0.516379
Hmgb1	344.001	-0.310239	0.155453	-1.99571	0.0459657	0.516379
Mpped1	1321.38	-0.372049	0.186422	-1.99574	0.0459622	0.516379
Slc39a14	1345.83	0.261198	0.130902	1.99537	0.0460023	0.516379
Spry2	1612.66	-0.231312	0.115906	-1.99569	0.0459675	0.516379
Mapk6	1829.11	-0.202086	0.101431	-1.99235	0.0463324	0.518894
Pde4d	910.766	-0.359247	0.180305	-1.99244	0.0463229	0.518894
Cckbr	97.1245	-0.48028	0.241283	-1.99053	0.0465331	0.519123
Chtop	2660.25	-0.198533	0.0996844	-1.99161	0.0464135	0.519123
Pah	20.4693	-1.18429	0.594938	-1.99061	0.0465242	0.519123
Pamr1	122.613	-0.702454	0.352899	-1.99052	0.0465333	0.519123
Slc28a2	173.329	0.716186	0.359759	1.99074	0.0465096	0.519123
Lrrc38	68.3433	0.655159	0.329256	1.98982	0.0466112	0.519589
Cacnb4	2870.26	-0.357152	0.179641	-1.98814	0.0467964	0.520443
Csdc2	591.882	-0.359162	0.18064	-1.98827	0.0467813	0.520443
Gnb5	1034.41	-0.283905	0.142769	-1.98856	0.0467498	0.520443
Clic5	550.558	0.557658	0.280551	1.98773	0.0468418	0.520545
Plcl2	714.602	-0.277341	0.139572	-1.98708	0.0469134	0.520938
Vamp4	368.999	-0.344714	0.173544	-1.98632	0.046998	0.521475
Triobp	220.408	0.474981	0.239297	1.9849	0.0471552	0.522815
Chm	902.758	0.257804	0.12998	1.98342	0.0473209	0.522941
Cmya5	588.239	-0.529472	0.266983	-1.98317	0.0473483	0.522941
F11r	176.134	0.667166	0.336401	1.98324	0.0473401	0.522941
Lrrd1	9.27264	1.87675	0.946106	1.98365	0.0472946	0.522941
Sparc	5749.9	0.251189	0.126627	1.9837	0.0472897	0.522941
Git1	5746.16	-0.262297	0.132309	-1.98246	0.0474283	0.523422
Ppp2r5d	1714.34	-0.249734	0.126	-1.98201	0.0474781	0.52357
AC118115.1	1.61124	-4.22638	2.13474	-1.97981	0.0477248	0.525887
Cdc14a	155.515	0.477538	0.241381	1.97836	0.0478884	0.526062
Heatr5a	547.784	0.295139	0.149207	1.97805	0.0479236	0.526062
Osbpl6	682.49	-0.243206	0.122912	-1.97869	0.0478508	0.526062
Tubgcp3	830.049	-0.346033	0.174832	-1.97924	0.0477895	0.526062
Ubxn2b	255.201	-0.457379	0.231183	-1.97843	0.0478807	0.526062
Clec4a3	101.304	0.884157	0.447338	1.97649	0.0480997	0.526119
Ppm1h	1486.57	-0.423387	0.214128	-1.97726	0.048012	0.526119
Rnf214	1472.64	-0.21539	0.108942	-1.97711	0.0480297	0.526119
Tasp1	192.176	-0.458634	0.232057	-1.97638	0.0481118	0.526119
Usp29	1406.28	-0.335507	0.16974	-1.97659	0.048088	0.526119
Zfp593	242.174	-0.368672	0.186641	-1.9753	0.048234	0.527055
Adgrg6	261.081	0.826176	0.41861	1.97362	0.0484251	0.527437
Btbd17	6.48191	-2.31471	1.17311	-1.97314	0.0484791	0.527437
Fbxo32	322.455	0.463311	0.234647	1.9745	0.0483248	0.527437
Tgfbi	974.616	0.580757	0.294391	1.97274	0.0485256	0.527437
Tnfrsf1b	127.301	0.790222	0.400484	1.97317	0.0484761	0.527437
Trerf1	95.2054	0.59957	0.303783	1.97368	0.0484185	0.527437
Wdr45b	562.626	-0.309876	0.157057	-1.97302	0.0484935	0.527437
Gimap5	110.107	0.703946	0.356897	1.97241	0.0485628	0.527442
Lrpap1	1509.44	-0.261606	0.13267	-1.97185	0.0486265	0.527736
Fads2	535.859	-0.465117	0.236016	-1.9707	0.0487582	0.528549
Irf5	107.779	0.693838	0.352161	1.97023	0.0488117	0.528549
Rhebl1	68.397	-0.712141	0.361396	-1.97053	0.0487779	0.528549
Phlpp1	1430.99	-0.224991	0.114244	-1.9694	0.0489077	0.529189
H3f3a	6694.5	0.402986	0.20472	1.96848	0.0490132	0.529534
Tap1	92.0999	0.508615	0.258365	1.96859	0.0490004	0.529534
Cck	8139.49	-0.365604	0.185833	-1.96738	0.0491391	0.529918
Scarb2	1393.59	0.252869	0.12852	1.96755	0.0491196	0.529918
Sstr4	366.186	-0.353125	0.179506	-1.96721	0.0491592	0.529918
Impg2	7.80938	2.21174	1.12467	1.96656	0.049234	0.530325
Myl9	85.2104	0.752294	0.38303	1.96406	0.0495232	0.533042
Mast2	3453.85	-0.247543	0.126072	-1.9635	0.0495877	0.533337
Tgm1	52.0331	0.944896	0.48163	1.96187	0.0497776	0.534979
Fcgr3a	70.0042	0.816848	0.416466	1.96138	0.0498347	0.535192
Kif22	10.626	1.96889	1.00465	1.95979	0.0500208	0.535664
Pgam5	795.2	-0.264118	0.134715	-1.96056	0.0499299	0.535664
Pitpnm3	1217.38	-0.281288	0.143557	-1.95941	0.0500649	0.535664
Rgs20	352.664	-0.442978	0.226074	-1.95944	0.050061	0.535664
Zfp418	232.172	-0.322958	0.164788	-1.95984	0.0500145	0.535664
Mfhas1	910.043	-0.231473	0.118207	-1.95819	0.0502077	0.536793
Clec4d	10.8209	1.60997	0.822825	1.95664	0.05039	0.537943
Wnt2	317.481	-0.40437	0.206632	-1.95695	0.0503528	0.537943
Cibar2	405.769	-0.37665	0.192737	-1.95421	0.0506758	0.540307
Smim14	3537.27	-0.289019	0.147902	-1.95412	0.0506866	0.540307
Bcs1l	266.916	-0.329777	0.168859	-1.95297	0.0508228	0.541357
Igsf3	385.342	-0.319792	0.163801	-1.95232	0.0509006	0.541608
Tbc1d5	518.431	0.273691	0.1402	1.95214	0.0509217	0.541608
Cep112	40.7988	-0.759391	0.389303	-1.95064	0.0510999	0.542902
Ephx4	301.703	-0.320307	0.164219	-1.95048	0.0511189	0.542902
Cspg4b	39.5824	0.895123	0.459512	1.94799	0.0514165	0.544855
Jaml	12.928	1.29604	0.665221	1.94829	0.0513804	0.544855
Thbs2	117.814	1.12949	0.579772	1.94816	0.0513954	0.544855
Disp2	3147.01	0.23159	0.118962	1.94675	0.0515645	0.544892
Obsl1	126.602	0.41782	0.214598	1.94699	0.051536	0.544892
Pcdh12	15.0127	1.39535	0.716777	1.94669	0.0515715	0.544892
Ydjc	182.714	-0.396728	0.203719	-1.94743	0.0514829	0.544892
Alx3	13.2279	2.08786	1.07281	1.94616	0.0516351	0.545164
Efna5	431.346	0.431758	0.221941	1.94537	0.0517304	0.545654
Gnaz	669.011	-0.274153	0.140965	-1.94483	0.0517954	0.545654
Sstr1	830.114	0.296491	0.152441	1.94496	0.0517801	0.545654
Sorbs3	135.645	0.471851	0.242677	1.94436	0.0518526	0.545856
Klhl25	127.888	0.431941	0.222248	1.94351	0.0519549	0.546342
Mrps35	369.38	-0.279531	0.14384	-1.94334	0.0519747	0.546342
Cnpy2	499.036	0.250223	0.128805	1.94265	0.052059	0.546829
Hmgcs1	7038.14	-0.464019	0.238929	-1.94208	0.0521276	0.54715
Abhd17a	992.822	-0.312436	0.160911	-1.94167	0.0521774	0.547273
Ltbp4	725.956	-0.319029	0.164481	-1.93961	0.052427	0.548534
Mrps18a	491.653	-0.262125	0.135156	-1.93942	0.0524502	0.548534
Nav3	2171.12	-0.296929	0.153093	-1.93954	0.0524362	0.548534
Pak2	1986.54	0.264598	0.136407	1.93977	0.0524077	0.548534
Dio3	24.6442	0.990155	0.510709	1.93878	0.0525275	0.548545
Pde4b	3353.27	-0.313277	0.16156	-1.93908	0.0524918	0.548545
Atp8b5p	2.37233	3.53347	1.82326	1.938	0.0526238	0.549151
Fam163a	121.415	-0.488264	0.252065	-1.93705	0.0527386	0.549552
Sestd1	552.229	0.338306	0.174634	1.93723	0.0527167	0.549552
Epc1	872.187	-0.275907	0.142558	-1.9354	0.0529414	0.55007
Mybpc1	225.847	0.513532	0.265307	1.93562	0.0529147	0.55007
Mylk	937.771	-0.455305	0.235215	-1.9357	0.0529046	0.55007
Sgms2	70.618	0.640883	0.331033	1.93601	0.0528665	0.55007
Arl2bp	3234.15	-0.21632	0.111902	-1.93311	0.0532221	0.551424
Ctnnd1	1706.2	0.21213	0.109736	1.93309	0.053225	0.551424
Edf1	1280.75	-0.248133	0.128301	-1.93399	0.0531144	0.551424
Sv2b	7365.41	-0.280796	0.145248	-1.93322	0.0532093	0.551424
Dlgap4	2320.53	-0.315412	0.163191	-1.93278	0.0532636	0.551426
Ctnna2	1527.55	-0.261031	0.135149	-1.93144	0.0534292	0.551552
Rcn3	104.638	0.532879	0.275879	1.93157	0.0534125	0.551552
Rpp25l	204.773	-0.358059	0.185323	-1.93208	0.05335	0.551552
Slc38a2	4559.26	0.201725	0.104417	1.93192	0.0533692	0.551552
Csmd1	1200.92	-0.333359	0.172681	-1.93049	0.0535459	0.551965
Shroom4	89.5713	0.65753	0.340602	1.9305	0.0535454	0.551965
Tmem35a	1114.65	-0.287204	0.148847	-1.92952	0.0536662	0.552808
Cygb	189.32	0.429105	0.222481	1.92872	0.0537655	0.553039
Fbxl14	442.827	-0.311146	0.161315	-1.9288	0.0537554	0.553039
Bnip2	738.585	0.306557	0.158989	1.92816	0.0538349	0.553356
Septin3	3637.6	-0.245106	0.127159	-1.92756	0.0539104	0.553737
Dhx40	576.646	0.252837	0.13126	1.92622	0.0540765	0.555046
Dmkn	32.8617	-1.12527	0.584455	-1.92533	0.0541881	0.555399
Mxra7	45.6434	0.757935	0.393616	1.92557	0.0541583	0.555399
Aplf	103.62	0.598982	0.311181	1.92487	0.0542458	0.555595
Pth2r	20.3663	-1.9817	1.03019	-1.92363	0.0544014	0.556791
Ccdc184	70.5284	-0.697786	0.362913	-1.92274	0.0545133	0.557144
Mcee	71.9683	0.524225	0.272612	1.92297	0.0544836	0.557144
Alkbh5	491.654	-0.286387	0.149005	-1.922	0.0546062	0.557292
Tmem145	236.708	-0.512056	0.266461	-1.9217	0.054644	0.557292
Ube2r2	754.818	-0.23844	0.124075	-1.92174	0.054638	0.557292
Cenpt	8.59846	1.63374	0.850294	1.92138	0.0546832	0.557296
RT1-M1-2	33.8655	-1.00791	0.524679	-1.921	0.0547316	0.557394
Retsat	608.754	-0.524741	0.273305	-1.91998	0.0548601	0.557912
Srp68	1570.29	-0.218857	0.113986	-1.92003	0.0548539	0.557912
Camk2b	8418.15	-0.244808	0.12757	-1.91901	0.0549834	0.558376
Chmp4c	13.3137	1.89687	0.988447	1.91904	0.0549797	0.558376
Acot1	27.5104	-1.02169	0.533293	-1.91582	0.0553882	0.558532
Ccdc90b	214.64	0.353796	0.184651	1.91603	0.0553611	0.558532
Enpp1	86.0063	0.511038	0.266536	1.91733	0.0551957	0.558532
Mrps26	436.085	-0.371982	0.194037	-1.91707	0.0552295	0.558532
Nrip3	2461.92	0.371968	0.194164	1.91574	0.0553983	0.558532
Ppm1f	1279.19	0.285339	0.148755	1.91818	0.0550882	0.558532
Purb	4621.12	-0.325661	0.169894	-1.91685	0.055257	0.558532
Taf4b	232.682	-0.381903	0.199163	-1.91754	0.0551694	0.558532
Tbc1d31	190.859	0.412984	0.215598	1.91552	0.055426	0.558532
Tfap2b	16.2022	1.39146	0.726021	1.91655	0.0552946	0.558532
Vps13b	1109.68	0.271334	0.141431	1.91848	0.0550499	0.558532
Cacna1c	521.283	0.265471	0.138625	1.91502	0.0554895	0.558735
Wasf1	1777.07	-0.253879	0.132591	-1.91475	0.0555238	0.558735
Gstp1	812.715	0.471534	0.24635	1.91408	0.0556096	0.559015
Klf10	1602.84	-0.360493	0.188353	-1.91393	0.0556294	0.559015
Zw10	409.589	-0.305615	0.159773	-1.9128	0.0557731	0.560068
Prorsd1	32.1722	0.757351	0.396019	1.91241	0.0558233	0.560128
Pusl1	105.202	0.549322	0.287326	1.91185	0.055896	0.560128
Saraf	2960.26	-0.245555	0.128419	-1.91214	0.0558578	0.560128
Atmin	1232.75	-0.288681	0.15112	-1.91028	0.056097	0.560657
Ccnf	215.858	-0.404228	0.211571	-1.9106	0.0560555	0.560657
Clec2d2	6.05049	2.50472	1.31109	1.91042	0.0560792	0.560657
Fez2	373.032	0.367118	0.192186	1.91022	0.0561047	0.560657
Eny2	1071.54	-0.254883	0.133522	-1.90893	0.0562717	0.561935
Nr5a1	1.6879	4.11414	2.15566	1.90853	0.0563224	0.562051
Tmem183a	1172.5	-0.209512	0.109798	-1.90815	0.0563713	0.562149
Abca7	1248.23	-0.256437	0.134428	-1.90762	0.0564404	0.562448
Aoah	12.3937	1.52994	0.802826	1.90569	0.0566898	0.563143
Flnb	1474.37	0.474153	0.24877	1.90599	0.0566519	0.563143
Lox	97.0529	1.1638	0.610831	1.90527	0.0567451	0.563143
Mosmo	1981.09	-0.225769	0.118469	-1.90572	0.0566868	0.563143
Sugp1	859.797	-0.272732	0.143062	-1.90639	0.0565991	0.563143
Zfp512b	1091.74	-0.282651	0.148337	-1.90547	0.0567195	0.563143
Aak1	9977.59	-0.216811	0.113848	-1.90439	0.0568596	0.563167
Gps1	1151.57	-0.201198	0.105629	-1.90476	0.0568117	0.563167
Usp13	1030.15	-0.306779	0.161094	-1.90435	0.056865	0.563167
Fam124a	57.8415	-0.56098	0.294727	-1.90339	0.0569901	0.563243
Msmo1	4519.56	-0.262716	0.138009	-1.90362	0.0569601	0.563243
Srebf2	3036.48	-0.307355	0.161446	-1.90377	0.0569406	0.563243
Parp14	243.449	0.420247	0.220859	1.90278	0.0570688	0.563246
Serpine1	3294.17	0.41183	0.216431	1.90283	0.057063	0.563246
Il1a	32.7119	1.16123	0.610535	1.90199	0.0571722	0.563879
Akr1c15	101.278	0.512339	0.269589	1.90044	0.057375	0.564331
Artn	57.0642	-0.662827	0.348703	-1.90083	0.0573237	0.564331
Erbin	2471.34	0.528571	0.278112	1.90057	0.0573586	0.564331
Ptbp1	1440.11	0.29765	0.156577	1.90098	0.057304	0.564331
Lcmt2	39.2564	-0.775075	0.408062	-1.8994	0.0575113	0.565285
Braf	1010.94	-0.246073	0.129598	-1.89874	0.0575984	0.565486
Zfhx3	88.3795	0.490679	0.258436	1.89865	0.0576104	0.565486
Hmgcr	2344.58	-0.377948	0.199096	-1.89832	0.0576537	0.565525
Macir	1505.29	-0.29249	0.154129	-1.89769	0.0577367	0.565953
Lta4h	451.976	0.273632	0.144285	1.89647	0.057898	0.567148
Cnih2	601.749	-0.358056	0.188867	-1.89581	0.0579847	0.567611
Dlk1	73.6313	0.727462	0.384154	1.89367	0.0582684	0.569125
Efhd2	8422.55	-0.35499	0.187431	-1.89398	0.0582276	0.569125
Kcne5	5.05401	-2.42826	1.28205	-1.89404	0.0582202	0.569125
Ppp1r3c	416.845	-0.459131	0.242483	-1.89345	0.0582977	0.569125
Sik3	2420.68	-0.223118	0.11786	-1.89308	0.058347	0.569219
Cped1	36.2619	1.09982	0.581487	1.8914	0.0585716	0.569848
Fkbp10	263.656	0.377953	0.19989	1.8908	0.0586507	0.569848
Nkpd1	52.1482	-0.705491	0.373173	-1.89052	0.0586888	0.569848
Nrep	1024.09	-0.440919	0.233158	-1.89107	0.058615	0.569848
Pgrmc1	3832.14	-0.267131	0.141279	-1.8908	0.0586509	0.569848
Phf13	378.947	-0.363626	0.192196	-1.89196	0.0584966	0.569848
Rims1	3111.62	-0.403964	0.213634	-1.89092	0.0586356	0.569848
Slc7a10	66.6425	-0.951514	0.503651	-1.88923	0.0588609	0.571133
Camkv	1604.28	-0.409566	0.216874	-1.8885	0.0589595	0.57161
Ndufa4	1131.06	-0.225114	0.119217	-1.88827	0.0589895	0.57161
Anks1b	4496.31	-0.271903	0.144061	-1.88741	0.0591046	0.571646
Cyp4f1	21.9567	-1.00796	0.534061	-1.88736	0.0591125	0.571646
Epb41l1	14048.5	-0.240314	0.127308	-1.88765	0.0590732	0.571646
Mx1	21.6469	0.98611	0.522976	1.88558	0.0593522	0.573194
Vps28	791.081	-0.255959	0.135728	-1.88583	0.0593182	0.573194
Mgp	521.376	0.755752	0.400881	1.88523	0.059399	0.57326
Rtl6	1726.88	-0.251688	0.133607	-1.88379	0.0595933	0.57475
Brk1	1898.17	-0.221214	0.117476	-1.88306	0.0596917	0.574944
Mars1	2607.28	-0.20983	0.111475	-1.8823	0.059795	0.574944
Mtpap	680.717	-0.306068	0.162577	-1.88261	0.0597534	0.574944
Slc19a1	92.8592	0.483091	0.256638	1.88238	0.0597842	0.574944
Syt4	3150.47	-0.302526	0.160733	-1.88217	0.0598134	0.574944
Asl	267.54	0.475527	0.252836	1.88077	0.0600027	0.575609
Reck	240.618	0.517863	0.275308	1.88103	0.0599681	0.575609
Zfp52	119.129	0.464059	0.246704	1.88104	0.059967	0.575609
Pask	235.701	-0.350429	0.18639	-1.88008	0.0600966	0.575933
Slc20a1	2885.54	-0.370114	0.196876	-1.87994	0.0601165	0.575933
Dtna	966.165	-0.405832	0.215974	-1.87908	0.0602339	0.576674
Rnf213	382.74	0.289112	0.154096	1.87618	0.0606309	0.579703
Stn1	98.8014	0.45228	0.241061	1.87621	0.0606267	0.579703
Bcl2l2	3010.4	-0.232137	0.123752	-1.87582	0.0606795	0.579782
RGD1565622	180.327	-0.46062	0.245664	-1.875	0.0607926	0.580477
Ascl1	161.513	-0.813179	0.433952	-1.87389	0.0609453	0.581548
Rexo5	19.521	1.09633	0.585162	1.87354	0.0609934	0.581621
Galk2	194.575	0.36933	0.197205	1.87283	0.0610925	0.581888
Siae	202.386	0.56607	0.302266	1.87275	0.0611023	0.581888
Pdcd6	774.579	-0.24426	0.130456	-1.87236	0.0611569	0.582023
Alg10	502.588	0.299626	0.160086	1.87165	0.0612553	0.582574
Slc25a36	1661.38	-0.244065	0.130425	-1.8713	0.0613029	0.582641
Arhgef5	37.8403	0.78208	0.418718	1.8678	0.0617906	0.582655
Neurl1	1760.01	-0.284579	0.152225	-1.86946	0.0615587	0.582655
Nos2	86.6965	2.02814	1.08487	1.86948	0.0615566	0.582655
Pla2g2d	33.7154	1.02414	0.548165	1.86831	0.0617195	0.582655
Pnpla1	17.832	1.21235	0.648014	1.87087	0.0613638	0.582655
Polr2a	2739.71	0.206381	0.110484	1.86797	0.061766	0.582655
Spta1	13.2551	1.44792	0.774618	1.8692	0.0615949	0.582655
Stc1	225.247	-0.453209	0.242536	-1.86863	0.0616745	0.582655
Stxbp5l	959.651	0.371113	0.198396	1.87057	0.061405	0.582655
Sun1	919.289	-0.270094	0.1445	-1.86917	0.0615996	0.582655
Tgds	269.091	-0.303634	0.162513	-1.86837	0.061711	0.582655
Tspan3	4215.41	-0.209989	0.112394	-1.86833	0.0617166	0.582655
Kdm4b	888.022	-0.275083	0.147311	-1.86737	0.0618506	0.582839
Perm1	15.061	1.1955	0.640453	1.86665	0.0619506	0.583155
Rgs22	14.7757	1.49726	0.802472	1.86581	0.0620686	0.583155
Slc2a12	97.9988	0.991808	0.531608	1.86567	0.0620869	0.583155
Tmem51	38.7231	0.788893	0.422771	1.86601	0.0620405	0.583155
Wdr37	1182.35	-0.229212	0.12285	-1.86579	0.0620712	0.583155
Ddias	13.7372	1.26225	0.677618	1.86277	0.0624942	0.583663
E2f2	22.2001	0.937377	0.503182	1.8629	0.0624765	0.583663
Egln3	261.216	-0.433345	0.232417	-1.86452	0.0622492	0.583663
Fam169b	20.7622	1.21412	0.651362	1.86396	0.0623267	0.583663
Prdm11	99.8186	-0.432727	0.232071	-1.86463	0.0622337	0.583663
Slc29a4	179.662	-0.446632	0.239651	-1.86368	0.0623669	0.583663
Syce1l	2.16744	-4.65465	2.49719	-1.86396	0.062328	0.583663
Ube2m	1832.57	-0.210657	0.113093	-1.86269	0.0625063	0.583663
Ube2w	1343.16	-0.282888	0.151868	-1.86272	0.0625011	0.583663
Arid1b	1266.26	-0.202889	0.108959	-1.86207	0.0625935	0.583719
Nlrp3	79.9193	0.642189	0.344856	1.86219	0.0625761	0.583719
Adarb1	6221.66	-0.305288	0.164064	-1.86079	0.0627742	0.584004
Mrs2	360.759	-0.284236	0.152691	-1.86151	0.0626719	0.584004
Omd	8.52527	2.10269	1.13003	1.86074	0.0627806	0.584004
Tle3	1165.91	-0.293794	0.157894	-1.8607	0.0627865	0.584004
Pmp22	477.017	0.376994	0.202653	1.86029	0.0628442	0.584162
Gse1	889.242	-0.307531	0.165373	-1.85962	0.0629389	0.584665
Ecd	314.191	-0.284427	0.153043	-1.85848	0.0631013	0.585506
Mmp25	13.4742	1.50955	0.812281	1.85841	0.0631109	0.585506
Cd38	267.623	0.483988	0.260592	1.85727	0.0632731	0.585877
Fam120b	884.96	0.245426	0.132105	1.85781	0.0631963	0.585877
Rnf126	619.644	-0.265008	0.142672	-1.85746	0.0632461	0.585877
Tcea2	476.623	-0.385148	0.207612	-1.85513	0.0635771	0.588313
Tspan7	10983.2	-0.238303	0.128477	-1.85483	0.0636209	0.58834
Fblim1	77.3897	0.868715	0.468788	1.85311	0.063867	0.588538
Gins3	66.1024	0.672585	0.362972	1.85299	0.0638837	0.588538
Klhl2	4624.58	-0.214429	0.115722	-1.85296	0.0638879	0.588538
Metrnl	106.007	0.711662	0.383893	1.8538	0.0637675	0.588538
Serpinb6a	488.216	0.480551	0.259252	1.85361	0.0637955	0.588538
Tenm2	398.743	0.442823	0.238946	1.85323	0.063849	0.588538
Ap5s1	67.4922	0.537337	0.290279	1.8511	0.0641547	0.589238
Col27a1	395.366	-0.379491	0.204903	-1.85205	0.0640179	0.589238
Serpinb8	7.29288	1.8248	0.985649	1.85136	0.0641171	0.589238
Tcf19	80.7775	0.529235	0.285917	1.85101	0.0641683	0.589238
Wdr59	434.399	0.313037	0.169117	1.85101	0.0641688	0.589238
Lrrc28	240.662	-0.321696	0.173842	-1.85051	0.0642402	0.589517
Tac4	2.20381	3.40913	1.84268	1.8501	0.0642997	0.589688
AABR07060610.1	16.4228	1.39577	0.75588	1.84655	0.0648121	0.590816
Cavin2	129.381	0.603325	0.326699	1.84673	0.064786	0.590816
Clcn2	222.818	-0.36891	0.19972	-1.84713	0.0647276	0.590816
Dtx4	376.17	-0.398447	0.21572	-1.84705	0.0647394	0.590816
Duoxa1	2.31807	3.50239	1.89528	1.84795	0.0646094	0.590816
Fcna	13.1256	1.25385	0.679183	1.84612	0.0648747	0.590816
Golga7b	436.727	-0.345908	0.187344	-1.84638	0.0648377	0.590816
Ndufb5	633.608	-0.232293	0.125646	-1.84879	0.0644878	0.590816
Sox4	226.628	0.384829	0.208224	1.84815	0.0645805	0.590816
Stub1	1835.92	-0.187287	0.101317	-1.84852	0.0645277	0.590816
Wdr91	664.722	-0.357264	0.193492	-1.8464	0.0648341	0.590816
Smpd3	716.868	-0.372179	0.201652	-1.84565	0.0649425	0.591059
Snupn	184.119	-0.329975	0.178812	-1.84537	0.064984	0.591063
Cep41	334.692	-0.294488	0.15961	-1.84504	0.0650311	0.591117
Col8a2	44.7698	0.86265	0.467674	1.84456	0.0651021	0.591389
Cxcl13	6.13396	1.95266	1.05913	1.84364	0.0652358	0.592218
Pi4ka	4939.04	-0.254614	0.138124	-1.84336	0.0652758	0.592218
Utp20	1003.64	0.317947	0.172565	1.84247	0.0654058	0.59272
Vom1r19	28.5675	-0.762112	0.413647	-1.84242	0.0654135	0.59272
Ptgds	1708.85	1.70478	0.926183	1.84066	0.0656719	0.594687
Brsk2	1505.85	-0.242719	0.131982	-1.83903	0.0659101	0.594933
C4a	411.595	0.407389	0.221431	1.8398	0.065798	0.594933
Cipc	1144.04	-0.239371	0.130235	-1.838	0.0660628	0.594933
Col12a1	622.415	0.451266	0.245522	1.83799	0.0660642	0.594933
Dnah11	14.7405	1.2816	0.697379	1.83774	0.0661011	0.594933
Ergic1	954.66	-0.249179	0.135562	-1.83811	0.0660456	0.594933
Fhip1b	573.252	-0.277042	0.150654	-1.83893	0.0659255	0.594933
Itgax	360.224	0.388051	0.211033	1.83881	0.0659426	0.594933
Mrpl47	608.235	-0.288961	0.15714	-1.83888	0.0659335	0.594933
Tmem98	70.8323	0.556909	0.303054	1.83766	0.0661129	0.594933
Trabd2b	148.868	-0.489813	0.266606	-1.83721	0.0661785	0.595151
Med18	169.137	0.414711	0.225835	1.83635	0.0663062	0.595927
Pgap6	749.753	0.288608	0.157212	1.83579	0.0663884	0.596293
Zfp326	387.743	-0.280923	0.153175	-1.834	0.0666535	0.598301
Arhgap8	21.1927	1.08583	0.592288	1.83327	0.066762	0.598856
Smoc2	3.33235	3.03944	1.65815	1.83303	0.0667986	0.598856
Cenpf	41.2088	0.999521	0.545418	1.83258	0.0668652	0.599079
Acacb	17.3812	1.0419	0.568999	1.83112	0.0670829	0.599176
Cast	1589.38	0.247497	0.135245	1.82999	0.067251	0.599176
Cep57	418.767	-0.246541	0.134708	-1.83019	0.067221	0.599176
Flrt3	534.824	-0.27271	0.148998	-1.83029	0.0672063	0.599176
Hmgcl	237.847	0.383189	0.209201	1.83168	0.0669997	0.599176
Nr4a3	344.034	-0.664778	0.36311	-1.83079	0.0671321	0.599176
Slc26a2	187.34	0.651732	0.355782	1.83183	0.0669765	0.599176
Srsf7	1846.79	-0.208966	0.114113	-1.83123	0.067067	0.599176
Trit1	403.037	-0.282986	0.154558	-1.83094	0.0671096	0.599176
Cebpd	419.711	0.360707	0.197157	1.82955	0.0673178	0.599399
Espl1	20.4007	1.26374	0.691064	1.82869	0.0674463	0.59943
Gramd4	1055.16	-0.265998	0.145435	-1.82898	0.0674026	0.59943
Naprt	47.3442	0.900254	0.492237	1.8289	0.0674142	0.59943
Rab8a	621.389	0.281452	0.154032	1.82723	0.0676654	0.601006
Nedd4	9030.08	0.193409	0.105875	1.82676	0.0677356	0.601216
Ppp1r2	2866.78	-0.204044	0.111712	-1.82652	0.0677726	0.601216
Fos	593.188	-0.608899	0.333611	-1.82518	0.0679744	0.602634
Ppp1r14c	250.609	-0.335311	0.183786	-1.82446	0.0680823	0.602847
Rnf150	404.237	-0.274747	0.150577	-1.82463	0.0680563	0.602847
Acsl5	1033.41	0.25091	0.137693	1.82224	0.068418	0.6032
Chrm2	365.73	-0.518226	0.284456	-1.82181	0.0684837	0.6032
Irs1	535.434	-0.361245	0.198269	-1.82199	0.0684563	0.6032
Rarb	47.3396	0.648368	0.355693	1.82283	0.0683294	0.6032
Sox13	137.758	0.483991	0.265527	1.82276	0.0683401	0.6032
Spata13	249.038	0.591657	0.324605	1.8227	0.0683494	0.6032
Wipf3	2302.58	-0.404739	0.22199	-1.82323	0.0682684	0.6032
Zeb1	1343.67	0.242018	0.132742	1.82322	0.0682697	0.6032
Zmynd8	2604.75	-0.25094	0.13775	-1.82171	0.0684997	0.6032
Ecsit	317.53	-0.301045	0.165355	-1.82059	0.068669	0.604321
Csnk1a1	7617.39	-0.184513	0.101426	-1.81919	0.0688823	0.604717
Glt1d1	448.272	-0.324303	0.178206	-1.81982	0.0687865	0.604717
Rad51	59.6439	0.624195	0.343029	1.81966	0.0688114	0.604717
Rasgef1b	617.695	-0.309062	0.169883	-1.81926	0.0688717	0.604717
Hmox1	4918.01	0.515405	0.283535	1.81778	0.0690971	0.606052
Miga1	1282.85	-0.255712	0.140683	-1.81764	0.0691186	0.606052
Mapkapk2	849.865	0.278543	0.153293	1.81706	0.0692075	0.606462
Iqcb1	444.585	-0.249622	0.137407	-1.81666	0.0692685	0.606626
Tecpr2	936.909	-0.313601	0.172658	-1.81632	0.0693219	0.606725
Polr3k	497.088	-0.46367	0.255342	-1.81588	0.0693889	0.606761
Slc18b1	200.184	0.402701	0.221783	1.81574	0.0694104	0.606761
Auts2l1	368.421	0.317735	0.175024	1.81538	0.0694662	0.60688
Bicc1	284.844	0.378251	0.20846	1.8145	0.0696009	0.607688
Fyttd1	3878.85	-0.18517	0.102068	-1.81417	0.0696513	0.607758
C1qtnf1	145.83	0.602908	0.332904	1.81106	0.0701322	0.609914
Ccdc74a	1.53726	3.97905	2.19718	1.81098	0.0701439	0.609914
Ciapin1	1094.94	-0.233371	0.128803	-1.81185	0.0700089	0.609914
Clhc1	10.5696	-1.25541	0.692809	-1.81205	0.0699781	0.609914
Hdac3	1132.63	-0.257199	0.142048	-1.81065	0.0701952	0.609914
Rad54l	29.7977	0.741141	0.409111	1.81159	0.0700495	0.609914
Syn2	2577.6	-0.359908	0.19877	-1.81067	0.0701914	0.609914
Cntn4	673.081	-0.430645	0.238235	-1.80764	0.070662	0.611752
Gpc1	1285.49	0.211132	0.116786	1.80785	0.0706293	0.611752
Igf1r	363.418	0.312625	0.172923	1.80788	0.0706247	0.611752
Lrp5	164.917	0.517382	0.286114	1.80831	0.0705589	0.611752
Parp3	307.831	0.445992	0.246568	1.8088	0.0704821	0.611752
Ube2f	596.988	-0.240805	0.133203	-1.80781	0.0706367	0.611752
Rsph1	42.1036	-0.703388	0.389213	-1.80721	0.0707299	0.611971
Fam8a1	2653.22	-0.200138	0.110786	-1.80652	0.0708366	0.612031
Prss22	24.8799	0.909716	0.503526	1.80669	0.0708103	0.612031
Smurf2	874.58	0.239787	0.132753	1.80627	0.070876	0.612031
Sprr1a	2569.5	-0.486957	0.269622	-1.80607	0.0709071	0.612031
Stard13	235.674	0.40481	0.224199	1.80558	0.0709837	0.612325
Esyt1	407.431	0.444777	0.246418	1.80497	0.0710798	0.612786
Ptgs2	8979.93	-0.948344	0.525593	-1.80433	0.0711793	0.613276
Ctsf	1647.22	0.387615	0.214925	1.80349	0.0713117	0.613682
Pard6b	104.862	-0.473673	0.262607	-1.80373	0.071273	0.613682
Cdkn2aipnl	378.395	0.425038	0.235746	1.80294	0.0713969	0.614048
Rasgrp4	16.1774	1.18915	0.659684	1.80261	0.0714497	0.614134
Apbb1ip	147.036	0.403929	0.224191	1.80172	0.0715896	0.61497
Ccdc60	3.32165	3.05454	1.69625	1.80076	0.0717414	0.61561
Slc35e1	1197.83	-0.219296	0.121783	-1.8007	0.0717498	0.61561
Asah1	1210.15	-0.261813	0.145534	-1.79898	0.0720216	0.616852
C1qtnf6	15.7244	1.09987	0.611481	1.7987	0.0720661	0.616852
Epha8	21.7714	-1.26241	0.701625	-1.79926	0.0719771	0.616852
Tmem14a	149.143	0.424874	0.236206	1.79875	0.0720589	0.616852
Ccdc117	248.252	0.309226	0.172001	1.79782	0.0722053	0.617657
Higd1a	1387.18	-0.263875	0.146796	-1.79756	0.0722461	0.617657
Fam13c	628.827	-0.262318	0.145965	-1.79713	0.0723145	0.617874
Anp32b	1749.14	0.255804	0.142447	1.79579	0.0725287	0.618602
Cyp27a1	120.262	0.576832	0.321199	1.79587	0.072515	0.618602
Trim24	674.234	-0.262387	0.146074	-1.79626	0.0724525	0.618602
Nudt3	3607.95	-0.273225	0.152284	-1.79417	0.0727853	0.619784
Tnfrsf22	14.3933	1.17244	0.653395	1.79438	0.0727518	0.619784
Zfyve21	154.983	-0.395296	0.22033	-1.7941	0.0727966	0.619784
Acot7	2322.54	-0.189133	0.105439	-1.79376	0.0728519	0.619888
Zfp423	223.645	-0.42802	0.238661	-1.79342	0.0729061	0.619982
Acap1	8.707	1.46511	0.818103	1.79086	0.0733159	0.620447
Agl	1210.96	0.216422	0.12079	1.79172	0.0731772	0.620447
Ccn5	48.0565	1.45383	0.811939	1.79056	0.0733632	0.620447
Id2	934.765	-0.371497	0.207332	-1.7918	0.073165	0.620447
Lcp2	136.377	0.510535	0.284978	1.79149	0.0732149	0.620447
Nde1	117.838	0.474064	0.264784	1.79038	0.0733923	0.620447
Parp6	2139.4	-0.242588	0.135346	-1.79235	0.073077	0.620447
Pdxk	328.153	-0.351211	0.196111	-1.79088	0.0733127	0.620447
Prkch	123.225	0.646564	0.361053	1.79077	0.0733301	0.620447
Tut1	298.329	0.304034	0.169733	1.79125	0.0732534	0.620447
Fpgt	277.865	-0.301185	0.168298	-1.78959	0.0735201	0.621163
Grn	1170.26	0.322454	0.180228	1.78914	0.0735921	0.621406
Pabpc4	2001.05	-0.254624	0.142358	-1.78861	0.0736776	0.621409
Slc24a3	891.996	-0.422263	0.236086	-1.7886	0.0736789	0.621409
Ltb	11.2694	1.53537	0.858547	1.78833	0.0737227	0.621414
Tbc1d8b	124.568	0.610452	0.341438	1.78789	0.0737944	0.621654
Ruvbl2	580.259	-0.262611	0.146974	-1.78678	0.0739731	0.622794
Fam234a	216.968	0.385177	0.215694	1.78575	0.0741392	0.623099
Ifit3	112.709	0.82187	0.460121	1.78621	0.074066	0.623099
Tbl2	360.11	-0.267397	0.14972	-1.78598	0.0741028	0.623099
Pcdh9	1748.34	0.314194	0.176052	1.78467	0.0743155	0.623728
Rnf39	222.316	-0.438958	0.245986	-1.78449	0.0743443	0.623728
Sp110	107.128	0.532971	0.298604	1.78488	0.0742815	0.623728
Mefv	16.4556	1.13545	0.636532	1.78381	0.0744552	0.624295
Vwa3b	9.42798	-1.36179	0.76377	-1.78299	0.0745882	0.625045
Bicdl1	619.557	-0.268463	0.15064	-1.78215	0.074725	0.625463
Hras	811.371	-0.251703	0.141234	-1.78217	0.0747215	0.625463
Evl	1408.83	-0.18828	0.105692	-1.78141	0.074846	0.626112
Ankrd52	666.333	-0.236472	0.132846	-1.78005	0.0750673	0.626648
Opn3	18.6382	-1.10236	0.619109	-1.78056	0.074985	0.626648
Pla2g4a	214.899	0.342054	0.192171	1.77995	0.0750845	0.626648
Syngap1	3897.5	-0.244639	0.137425	-1.78016	0.0750504	0.626648
Flrt1	506.811	-0.272965	0.153432	-1.77907	0.0752284	0.627121
Prkg2	86.5021	-0.57739	0.324514	-1.77925	0.0751993	0.627121
Ppp1r3g	36.9744	-0.718591	0.404087	-1.77831	0.0753537	0.627438
Septin11	3198.28	-0.207778	0.116831	-1.77845	0.0753293	0.627438
Nkain1	410.251	0.286429	0.161151	1.7774	0.0755022	0.627719
Tp53i11	823.924	0.257002	0.144574	1.77766	0.0754604	0.627719
Tsen2	204.459	-0.386997	0.217744	-1.7773	0.0755183	0.627719
Neurl3	7.28493	2.01232	1.13338	1.7755	0.0758146	0.629091
Ostf1	396.768	0.406207	0.228742	1.77583	0.075761	0.629091
Pex5l	817.844	0.335209	0.188776	1.77569	0.0757837	0.629091
Dpp4	40.0714	0.698564	0.393618	1.77473	0.0759432	0.629794
Atf2	2733.7	-0.209492	0.118105	-1.77378	0.0760993	0.630725
Slc17a9	26.8879	0.771114	0.435063	1.77242	0.076325	0.631868
Slc8a3	569.415	-0.295721	0.166829	-1.7726	0.0762949	0.631868
Tradd	30.6712	0.823189	0.464536	1.77207	0.0763835	0.631987
P2ry13	11.8562	-1.2084	0.682595	-1.7703	0.0766768	0.63405
Alkal2	154.696	-0.462509	0.2624	-1.76261	0.0779667	0.635855
Bmp3	112.854	-0.595576	0.338685	-1.75849	0.0786636	0.635855
Calhm4	3.35335	3.13145	1.77706	1.76215	0.0780433	0.635855
Catsperb	2.00863	4.3635	2.46952	1.76695	0.0772371	0.635855
Ccdc85b	251.97	-0.413814	0.234613	-1.76381	0.0777634	0.635855
Ccr6	3.81095	2.12406	1.2064	1.76066	0.0782956	0.635855
Cdpf1	40.5231	-0.670935	0.380027	-1.76549	0.0774813	0.635855
Cenpe	51.0716	0.704738	0.399691	1.76321	0.0778653	0.635855
Cers2	855.346	0.287793	0.163424	1.76102	0.0782348	0.635855
Evi2b	49.1498	0.757495	0.429811	1.76239	0.078003	0.635855
Fcrl2	24.9005	2.01808	1.14646	1.76028	0.0783606	0.635855
Fmn1	93.9477	0.420146	0.238264	1.76337	0.0778389	0.635855
Galt	240.421	-0.413325	0.235029	-1.75861	0.0786434	0.635855
Gjc3	256.064	0.610724	0.345589	1.7672	0.0771951	0.635855
Gpn1	581.175	-0.256659	0.14573	-1.76119	0.0782056	0.635855
Hmgb2l1	238.405	0.519462	0.293994	1.76691	0.0772427	0.635855
Ifit1bl	69.3577	0.964348	0.548456	1.7583	0.0786968	0.635855
Igfbp5	308.388	0.746721	0.424464	1.75921	0.0785421	0.635855
Igtp	99.6603	0.475106	0.269192	1.76494	0.0775746	0.635855
Ilk	832.211	0.238071	0.135418	1.75804	0.07874	0.635855
Insm1	15.3331	-1.04664	0.595062	-1.75888	0.0785973	0.635855
Itga2	138.337	-0.807367	0.457481	-1.76481	0.0775962	0.635855
Khnyn	113.247	0.51868	0.294054	1.76389	0.0777499	0.635855
Kif17	319.667	-0.361938	0.205607	-1.76034	0.0783507	0.635855
Klf12	95.354	0.49302	0.280448	1.75797	0.0787522	0.635855
Lilrc2	9.9578	1.56795	0.890467	1.76081	0.0782699	0.635855
Mob3a	256.479	0.332353	0.187976	1.76806	0.0770512	0.635855
Necab2	205.119	-0.388173	0.220634	-1.75935	0.0785181	0.635855
Nfatc4	72.3893	1.06299	0.601095	1.76843	0.0769895	0.635855
Pawr	148.537	0.580118	0.329665	1.75972	0.0784556	0.635855
Prr7	230.866	-0.433639	0.246425	-1.75972	0.078455	0.635855
Prrc1	412.1	0.28389	0.161388	1.75905	0.0785692	0.635855
Ptprn	12022.5	-0.260413	0.147654	-1.76368	0.0777866	0.635855
Rev3l	1466.34	-0.211351	0.119918	-1.76247	0.0779904	0.635855
RGD1565987	4.18631	-3.60294	2.04783	-1.75939	0.0785106	0.635855
Snx8	163.219	0.407611	0.230967	1.7648	0.0775971	0.635855
Stard7	1922.43	-0.231064	0.130759	-1.7671	0.0772117	0.635855
Sv2c	269.167	0.406538	0.230394	1.76453	0.0776425	0.635855
Thbs4	23.3335	0.992264	0.561394	1.7675	0.0771444	0.635855
Tmem181	616.406	-0.260583	0.147989	-1.76082	0.0782685	0.635855
Uap1	805.603	0.263053	0.14963	1.75802	0.078744	0.635855
Vat1l	2632.93	-0.456367	0.258685	-1.76418	0.0777015	0.635855
Usp25	1064.16	-0.22153	0.126038	-1.75764	0.078808	0.635948
Mgst3	582.894	-0.363771	0.207019	-1.75719	0.0788853	0.636214
C1qtnf2	24.7095	1.04873	0.596958	1.75679	0.0789531	0.636405
Adgrd1	114.815	-0.58573	0.333786	-1.75481	0.0792922	0.637038
Dym	661.241	-0.293314	0.167125	-1.75505	0.0792501	0.637038
Kank1	506.266	0.456555	0.260215	1.75453	0.07934	0.637038
Kank4	20.2386	0.99942	0.569365	1.75532	0.079204	0.637038
Otud7a	491.856	-0.246337	0.140304	-1.75573	0.0791337	0.637038
Rps6ka2	796.221	-0.375761	0.214168	-1.75452	0.0793418	0.637038
Slc35c2	267.964	0.322226	0.183614	1.75491	0.079275	0.637038
Itgbl1	36.9775	0.678948	0.387191	1.75352	0.079512	0.637758
Zfp217	103.062	0.473782	0.270196	1.75348	0.0795201	0.637758
Acadl	320.537	0.33668	0.1921	1.75262	0.0796666	0.638406
Palldl1	835.134	0.20274	0.115687	1.75249	0.0796898	0.638406
RGD1308601	886.773	-0.213763	0.122009	-1.75203	0.0797691	0.638686
Baiap2l1	15.3454	-1.04964	0.599347	-1.7513	0.0798944	0.63895
Htra4	27.2912	-1.08597	0.62018	-1.75106	0.0799354	0.63895
Mlip	194.052	-0.368204	0.210245	-1.75131	0.079893	0.63895
Bcas3	463.77	0.272169	0.155486	1.75044	0.0800421	0.639092
Fam32a	998.059	-0.19622	0.112086	-1.75062	0.0800113	0.639092
Brca1	73.2241	0.48604	0.277848	1.7493	0.0802389	0.640308
Axl	1367.79	0.329651	0.188532	1.74851	0.0803754	0.640692
Ftcd	11.1771	-1.27478	0.729231	-1.74812	0.0804441	0.640692
Gpr88	1281.63	0.30551	0.174748	1.74829	0.0804145	0.640692
Mchr1	665.948	-0.356099	0.203742	-1.74779	0.0805001	0.640692
RGD1310587	153.419	0.383932	0.219674	1.74774	0.0805098	0.640692
H2bu1	170.689	0.457604	0.26188	1.74738	0.0805714	0.640828
Dpep2	4.07631	2.28736	1.30933	1.74697	0.0806427	0.641041
Tns3	1658.17	0.254822	0.145948	1.74597	0.0808158	0.642061
Nipal3	612.655	0.390169	0.223505	1.74568	0.080866	0.642106
Abcb4	128.6	0.43142	0.247254	1.74484	0.0810123	0.642912
Aff1	491.333	0.299394	0.171804	1.74265	0.0813942	0.643845
Calhm5	13.1143	1.78813	1.02565	1.74342	0.0812611	0.643845
Egr1	1835.73	-0.961191	0.551597	-1.74256	0.0814103	0.643845
Etnppl	42.4728	1.18973	0.682358	1.74356	0.0812356	0.643845
Jdp2	124.074	-0.377658	0.216704	-1.74274	0.0813795	0.643845
Sema3e	288.258	0.471528	0.270624	1.74237	0.0814432	0.643845
Zmat3	2235	-0.315528	0.181027	-1.74299	0.0813351	0.643845
Camk2a	6190.01	-0.413321	0.23747	-1.74052	0.0817678	0.644158
Klf9	1860.46	-0.318326	0.182777	-1.74161	0.081577	0.644158
Mmp14	348.095	0.649184	0.373018	1.74036	0.0817964	0.644158
Sec63	2739.84	-0.174452	0.100234	-1.74044	0.0817815	0.644158
Slc9a5	246.993	-0.41378	0.237679	-1.74092	0.0816981	0.644158
Topaz1	10.3901	-1.21853	0.699966	-1.74084	0.0817117	0.644158
Usp12	1961.93	-0.23884	0.137228	-1.74046	0.0817789	0.644158
Rasal3	61.832	0.635281	0.365095	1.74004	0.0818513	0.644237
Foxd1	21.3362	1.74672	1.00421	1.7394	0.0819651	0.64436
Glipr2	153.881	0.434176	0.249643	1.73919	0.0820013	0.64436
Srpk3	3.76991	-2.85759	1.64261	-1.73966	0.0819179	0.64436
Cd151	1213.52	0.362622	0.208539	1.73887	0.0820577	0.644451
Col4a6	16.6154	1.18635	0.682571	1.73806	0.0822007	0.644742
Pcdh8	1354.82	-0.965737	0.555736	-1.73776	0.0822526	0.644742
Rap1a	1055.67	0.279884	0.161071	1.73764	0.0822741	0.644742
Tfcp2	428.06	-0.239395	0.137745	-1.73796	0.0822179	0.644742
Kat6b	952.526	-0.208893	0.120252	-1.73712	0.0823654	0.644827
Smc2	1058.04	0.46901	0.270001	1.73707	0.0823747	0.644827
Pank1	293.47	-0.334739	0.192734	-1.73679	0.0824239	0.644862
Syt7	1232.52	-0.372399	0.214465	-1.73641	0.0824919	0.645043
Selenoi	1567.75	-0.255876	0.147414	-1.73576	0.0826058	0.645232
Tlr3	55.9897	0.566871	0.32654	1.73599	0.0825649	0.645232
Mylk3	10.4533	1.31356	0.75722	1.73471	0.0827922	0.646337
Rpa1	489.183	0.278753	0.16075	1.73408	0.0829033	0.646502
Rsad2	12.1543	1.25611	0.724311	1.73422	0.0828795	0.646502
Kcna5	56.1212	-0.711247	0.410338	-1.73332	0.0830387	0.647207
Siglech	1.39665	3.83913	2.21598	1.73248	0.0831889	0.648026
B3galt1	752.311	-0.281931	0.162772	-1.73206	0.0832628	0.648251
Slc17a7	9205.94	-0.263395	0.1521	-1.73173	0.083322	0.64836
Nphp4	316.136	-0.309612	0.178816	-1.73146	0.0833702	0.648385
Arl15	226.318	0.478407	0.276391	1.7309	0.0834691	0.648452
Usp45	702.754	-0.240751	0.139081	-1.73101	0.0834493	0.648452
Armc1	1046.48	-0.224741	0.129936	-1.72963	0.0836969	0.649139
Pin1	950.77	-0.237271	0.137199	-1.7294	0.0837381	0.649139
Tmc1	1.91192	-3.38938	1.95933	-1.72987	0.0836538	0.649139
Ubl5	347.127	-0.250796	0.144974	-1.72994	0.0836411	0.649139
Clic4	4410.13	0.295996	0.171217	1.72877	0.0838503	0.649512
Plscr3	212.416	0.420442	0.243224	1.72862	0.0838765	0.649512
Rnf145	1768.14	-0.237935	0.137738	-1.72744	0.0840881	0.650716
Srf	1104.32	-0.241339	0.139724	-1.72725	0.0841225	0.650716
Tex10	421.051	0.244358	0.14155	1.7263	0.0842936	0.651339
Tomm40l	289.925	0.326745	0.189252	1.7265	0.0842569	0.651339
Ap2a1	3225.33	-0.185841	0.107758	-1.72461	0.0845972	0.652633
Bbs7	211.361	0.33848	0.196254	1.72471	0.0845806	0.652633
Slc45a4	334.422	0.318579	0.184673	1.7251	0.0845092	0.652633
Abhd18	107.166	-0.510003	0.29638	-1.72078	0.0852915	0.654159
Ano10	439.99	0.262151	0.152204	1.72236	0.0850035	0.654159
Disp3	668.752	-0.477606	0.277415	-1.72163	0.085137	0.654159
Dmac2l	190.229	-0.303392	0.176281	-1.72107	0.0852385	0.654159
Myo18b	93.0399	0.469138	0.272508	1.72155	0.0851505	0.654159
Naxe	358.565	-0.252476	0.146611	-1.72207	0.0850561	0.654159
Nhlrc3	490.071	0.393078	0.22821	1.72244	0.0849895	0.654159
Prep	1041.88	-0.22435	0.130364	-1.72096	0.0852586	0.654159
Rcsd1	62.7313	0.628925	0.365118	1.72252	0.0849746	0.654159
Rgs13	6.55177	-2.08069	1.20918	-1.72075	0.0852954	0.654159
Slc2a13	1115.79	-0.355014	0.20629	-1.72094	0.0852611	0.654159
Rgs19	276.881	-0.291479	0.169443	-1.72022	0.0853921	0.654552
Spc25	25.4262	0.776134	0.451301	1.71977	0.0854741	0.654831
Unk	293.802	-0.324411	0.18869	-1.71928	0.0855625	0.655159
Eme2	238.966	-0.326807	0.190233	-1.71793	0.0858094	0.6567
Loxl2	177.647	0.602113	0.35071	1.71684	0.0860089	0.657877
Rab3d	167.149	0.352128	0.205169	1.71628	0.0861104	0.658027
Sybu	687.812	-0.263015	0.153252	-1.71623	0.0861201	0.658027
Atp1a1	10554.3	-0.249457	0.145594	-1.71337	0.0866439	0.658879
Dusp22	327.582	-0.272542	0.159058	-1.71348	0.086625	0.658879
Gbp6	16.814	-1.18532	0.691206	-1.71486	0.086371	0.658879
Gnpnat1	479.122	-0.395643	0.230686	-1.71507	0.0863328	0.658879
Itprid2	917.683	0.316715	0.18472	1.71457	0.0864242	0.658879
Phf11	4.32879	-2.20996	1.28912	-1.71432	0.0864705	0.658879
Rex2	97.8335	0.463593	0.27039	1.71453	0.0864305	0.658879
Tomm40	977.912	-0.204113	0.119115	-1.71358	0.0866056	0.658879
Usp6nl	470.661	0.312668	0.182456	1.71367	0.0865898	0.658879
Adamts9	790.859	0.514463	0.300466	1.71222	0.0868568	0.660148
Sspn	73.8089	0.54084	0.316128	1.71083	0.0871133	0.661749
Enox1	673.974	-0.301099	0.176174	-1.7091	0.0874322	0.663086
Ephx1	100.038	0.475513	0.278186	1.70934	0.0873887	0.663086
Pik3c2a	1093.27	0.214388	0.125455	1.70888	0.0874739	0.663086
Ptger2	26.0692	0.844599	0.49414	1.70923	0.0874081	0.663086
Aldh16a1	256.045	0.30218	0.176915	1.70806	0.0876261	0.66327
Arhgef7	2512.97	-0.285117	0.167185	-1.7054	0.0881189	0.66327
Cep43	488.967	-0.232886	0.136568	-1.70528	0.0881424	0.66327
Clec5a	110.314	0.686221	0.402359	1.70549	0.0881025	0.66327
Fzd2	58.0533	1.16725	0.684611	1.70498	0.0881976	0.66327
Hspa13	2350.89	-0.206105	0.120693	-1.70768	0.0876964	0.66327
Igf2bp2	89.1391	-0.806143	0.472892	-1.70471	0.0882492	0.66327
Kdm1b	252.749	-0.301679	0.176658	-1.7077	0.0876916	0.66327
Lars2	321.279	0.264344	0.155003	1.70541	0.0881174	0.66327
Pitpna	5247.05	-0.191129	0.111949	-1.7073	0.0877668	0.66327
Ppp5c	1513.14	-0.187393	0.109906	-1.70504	0.0881872	0.66327
Scn9a	98.5906	0.637949	0.374083	1.70537	0.0881257	0.66327
Sgsm1	1496.99	-0.20068	0.117682	-1.70527	0.0881441	0.66327
Spout1	409.819	-0.277847	0.163017	-1.70441	0.0883046	0.66327
Tns1	519.475	0.335588	0.196483	1.70798	0.0876408	0.66327
Unc13a	2632.67	-0.233809	0.137189	-1.70428	0.0883283	0.66327
Vangl1	118.937	0.484647	0.284327	1.70454	0.0882794	0.66327
Zcwpw1	34.1343	0.862623	0.506137	1.70433	0.0883196	0.66327
Hgs	2076.08	-0.172725	0.101379	-1.70376	0.0884268	0.663663
Arhgap27	145.929	0.599993	0.352469	1.70226	0.0887068	0.664315
Cep131	575.367	-0.259716	0.152577	-1.70219	0.0887192	0.664315
Mis18bp1	43.7405	0.624816	0.366956	1.7027	0.0886239	0.664315
Pcnt	459.63	0.231859	0.136223	1.70206	0.0887448	0.664315
Trap1	1017.02	-0.254452	0.14944	-1.70271	0.0886231	0.664315
Eya4	210.06	0.624094	0.36674	1.70173	0.0888053	0.664423
Arf6	2228.4	0.209482	0.1232	1.70034	0.0890662	0.665682
Nfya	359.639	0.319136	0.187667	1.70054	0.0890299	0.665682
Bmp2k	372.332	0.276768	0.162867	1.69935	0.0892537	0.665931
Cxcr4	58.5916	0.937285	0.551513	1.69948	0.0892286	0.665931
Rab37	5.86447	-1.65866	0.976149	-1.69918	0.0892847	0.665931
Yap1	658.364	0.326533	0.192096	1.69984	0.0891617	0.665931
Arfgef3	1498.17	-0.318528	0.187492	-1.69889	0.08934	0.665997
Cdk19	1153.76	0.185428	0.109172	1.69849	0.089415	0.666212
Gabpb2	82.8812	0.507779	0.299016	1.69817	0.0894762	0.666322
Arhgef9	4048.35	-0.2447	0.144189	-1.69708	0.089681	0.666811
Fbln5	105.219	0.761231	0.448486	1.69734	0.0896331	0.666811
Gmds	303.439	-0.326356	0.19229	-1.6972	0.0896584	0.666811
Engase	173.63	0.337226	0.198749	1.69675	0.0897448	0.666941
Slit2	278.243	0.448574	0.264461	1.69618	0.0898516	0.667389
Cyp46a1	1272.55	-0.315688	0.186269	-1.69479	0.0901146	0.667618
Fsd2	2.03021	3.29316	1.94301	1.69487	0.0900994	0.667618
Mark1	1244.12	-0.205851	0.12146	-1.69481	0.0901121	0.667618
Snrnp35	356.732	0.26513	0.156396	1.69525	0.0900288	0.667618
Tubb4b	3764.93	-0.224978	0.132744	-1.69483	0.0901075	0.667618
Ak9	2.05225	3.30797	1.95306	1.69373	0.0903161	0.667778
Bcl2l14	1.5593	3.99734	2.36171	1.69256	0.0905385	0.667778
Cdyl2	232.88	-0.359507	0.212215	-1.69407	0.0902519	0.667778
Galr2	64.7997	0.597182	0.352769	1.69284	0.0904861	0.667778
Nrros	93.3301	0.612226	0.361533	1.69341	0.0903768	0.667778
Nsd2	1091.38	-0.220241	0.130129	-1.69248	0.0905541	0.667778
Pfkfb3	1780.55	-0.337632	0.199488	-1.6925	0.0905512	0.667778
Serpinh1	1671.76	0.317993	0.187841	1.69289	0.0904768	0.667778
Tgfb1	542.337	-0.24393	0.144107	-1.6927	0.0905127	0.667778
Th	51.6918	-0.748859	0.44261	-1.69192	0.0906622	0.668233
Cyyr1	352.865	0.293596	0.173611	1.69112	0.0908148	0.668363
Grpel1	940.002	-0.235185	0.139081	-1.69098	0.0908397	0.668363
Lamc3	19.2049	1.06275	0.628506	1.69091	0.0908535	0.668363
Syt17	225.522	0.390128	0.230729	1.69085	0.0908657	0.668363
Fzd10	86.8454	0.524524	0.310406	1.6898	0.0910665	0.668472
Grin3a	178.822	0.420058	0.248495	1.69041	0.0909498	0.668472
Lratd1	2827.04	-0.412102	0.243875	-1.6898	0.0910654	0.668472
Shf	185.902	-0.413434	0.244648	-1.68991	0.0910448	0.668472
Mob4	1996.58	-0.201492	0.119271	-1.68937	0.0911491	0.668737
Cmip	2686.22	-0.243614	0.144335	-1.68784	0.0914426	0.668794
Ncf4	165.167	0.353541	0.209413	1.68825	0.0913631	0.668794
Npc1	914.749	0.390832	0.231653	1.68714	0.0915755	0.668794
Pcdhb3	107.017	0.548917	0.325231	1.68778	0.0914543	0.668794
Peli1	565.119	-0.269963	0.159988	-1.68739	0.0915285	0.668794
Runx1t1	130.03	0.381131	0.225847	1.68756	0.0914955	0.668794
Snap91	4993.58	-0.242405	0.143626	-1.68776	0.0914578	0.668794
Sympk	1344.57	-0.199299	0.118072	-1.68795	0.0914214	0.668794
Vwc2	102.316	-0.579964	0.343713	-1.68735	0.091536	0.668794
Abhd17c	445.536	-0.25436	0.150895	-1.68568	0.0918576	0.669233
Alx1	5.01676	2.18443	1.29528	1.68645	0.0917085	0.669233
Phldb2	136.511	0.607129	0.360095	1.68602	0.0917912	0.669233
RT1-S3	265.07	-0.405466	0.240584	-1.68534	0.0919226	0.669233
Slc25a13	191.539	0.303978	0.180337	1.68561	0.0918711	0.669233
Tbc1d2b	350.96	0.299392	0.177666	1.68514	0.0919614	0.669233
Vldlr	1061.67	-0.25451	0.15093	-1.68628	0.091741	0.669233
Enc1	14626.7	-0.283773	0.168472	-1.68439	0.0921055	0.669604
Usp35	309.157	0.256193	0.152085	1.68454	0.0920779	0.669604
AC110846.1	7.76341	1.75248	1.04114	1.68323	0.09233	0.670558
Ly96	47.2526	0.733543	0.435784	1.68327	0.0923222	0.670558
Cryab	1814.25	-0.317722	0.188901	-1.68195	0.0925792	0.670965
Gnai3	1078.7	0.223482	0.132865	1.68203	0.0925639	0.670965
Lmo2	244.074	0.447331	0.265993	1.68174	0.0926193	0.670965
Slc5a3	716.291	0.367626	0.218507	1.68245	0.0924825	0.670965
Tmem245	400.313	0.254847	0.151472	1.68247	0.0924777	0.670965
Acbd5	1142.36	0.266986	0.15882	1.68106	0.0927507	0.671191
Dock6	193.352	0.430411	0.256046	1.68099	0.092765	0.671191
Ssc5d	155.278	0.565071	0.33618	1.68086	0.0927905	0.671191
AABR07057438.1	1.88314	3.16439	1.88342	1.68013	0.0929317	0.671536
Trpm6	12.8743	1.18016	0.702338	1.68034	0.0928916	0.671536
Cox6a2	47.3674	0.656447	0.390781	1.67984	0.0929892	0.671615
Zfp523	580.872	-0.241464	0.143766	-1.67956	0.0930422	0.67166
Cstf3	463.855	0.284009	0.169125	1.67928	0.0930966	0.671716
Vax2	19.6309	-1.30297	0.776219	-1.67861	0.0932284	0.672329
Camk4	493.003	-0.532236	0.317244	-1.67769	0.0934084	0.67329
Fkbp1b	233.646	-0.33208	0.198029	-1.67692	0.0935572	0.673687
Rps6	4918.03	0.435049	0.259417	1.67703	0.0935371	0.673687
Cyba	118.848	0.453629	0.270694	1.6758	0.0937779	0.674641
Pi4k2b	246.69	0.32412	0.193416	1.67577	0.0937836	0.674641
[truncated: 15,269 more rows]

## Sheet: AR vs R
id	baseMean	log2FC	lfcSE	stat	PValue	FDR
Inhba	491.44	-3.80304	0.209309	-18.1695	8.99737e-74	1.27142e-69
Psd2	904.903	2.15272	0.129292	16.6501	3.02152e-62	2.13486e-58
Scg2	5964.97	-2.27903	0.150694	-15.1235	1.13269e-51	5.33537e-48
Ptx3	431.777	-4.71742	0.33699	-13.9987	1.58753e-44	5.60835e-41
Vgf	5949.83	-3.12232	0.231267	-13.5009	1.54385e-41	4.36323e-38
Crhbp	481.243	-2.7132	0.202993	-13.3659	9.56119e-41	2.25182e-37
Mmd2	1197.38	2.28642	0.172569	13.2493	4.55521e-40	9.19567e-37
Col4a1	3098.53	-2.65742	0.207484	-12.8078	1.48304e-37	2.61961e-34
Akap12	2923.78	-2.28503	0.181891	-12.5627	3.38773e-36	5.31911e-33
Palm3	300.778	-2.76894	0.220866	-12.5367	4.69916e-36	6.64038e-33
Crem	439.39	-2.22321	0.184607	-12.0429	2.11299e-33	2.71443e-30
Il7r	421.914	-3.55995	0.296193	-12.019	2.82317e-33	3.32452e-30
Acss1	355.451	2.96964	0.250431	11.8581	1.95385e-32	2.12383e-29
Cracdl	769.38	2.17639	0.18492	11.7694	5.61526e-32	5.6678e-29
Pou3f2	526.692	2.17237	0.18479	11.7559	6.58324e-32	6.20185e-29
Akap5	1410.32	3.11862	0.267588	11.6546	2.17488e-31	1.92082e-28
Icam1	360.671	-3.48258	0.299068	-11.6448	2.43922e-31	1.93304e-28
Ier3	249.301	-2.79505	0.240043	-11.644	2.4623e-31	1.93304e-28
Gucy1a1	1054.32	2.9149	0.253624	11.493	1.43105e-30	1.06433e-27
Fcgr2b	320.011	-2.21077	0.192599	-11.4786	1.68947e-30	1.1937e-27
Pdlim1	167.438	-3.48711	0.304258	-11.461	2.07073e-30	1.3934e-27
Pip4k2c	818.612	1.37334	0.120545	11.3927	4.54558e-30	2.91971e-27
Itih3	2396.68	2.41099	0.213264	11.3052	1.23693e-29	7.59958e-27
Hlf	1641.23	3.29217	0.291874	11.2794	1.6585e-29	9.76511e-27
Dsp	210.374	-3.9819	0.354448	-11.2341	2.77385e-29	1.56789e-26
Plau	201.141	-3.90071	0.348203	-11.2024	3.96859e-29	2.15693e-26
Pecam1	620.601	-1.89377	0.170205	-11.1264	9.33294e-29	4.88458e-26
Hdac9	299.564	1.84778	0.166889	11.072	1.71618e-28	8.6612e-26
Rai14	798.715	-2.8576	0.259948	-10.993	4.13068e-28	2.01278e-25
Tnc	1336.02	-3.17582	0.291567	-10.8923	1.25474e-27	5.91025e-25
Adamts9	491.289	-4.00663	0.368559	-10.8711	1.58322e-27	7.21695e-25
Itga5	317.401	-3.70412	0.341182	-10.8567	1.85279e-27	8.18179e-25
Dynlt5	217.02	-2.98194	0.276044	-10.8024	3.3531e-27	1.43584e-24
Trerf1	285.021	1.99724	0.185081	10.7911	3.7903e-27	1.57532e-24
Anxa2	1445.72	-3.1523	0.293226	-10.7504	5.89855e-27	2.26041e-24
Mchr1	338.9	-2.58792	0.240734	-10.7501	5.91855e-27	2.26041e-24
Trib1	592.707	-1.87842	0.1747	-10.7523	5.78325e-27	2.26041e-24
Kdr	733.761	-3.15017	0.294699	-10.6895	1.14041e-26	4.24084e-24
Rftn2	264.578	2.62942	0.248492	10.5815	3.63124e-26	1.31572e-23
Lamc2	1119.77	-3.06347	0.291235	-10.5189	7.07062e-26	2.49787e-23
P4hb	3521.81	-1.60693	0.154259	-10.4171	2.07175e-25	7.14045e-23
Sele	262.945	-5.00477	0.480898	-10.4071	2.30076e-25	7.74095e-23
Slc2a1	3041.88	-1.20927	0.11625	-10.4023	2.42063e-25	7.95486e-23
Ctsc	530.983	-2.68989	0.259875	-10.3507	4.15339e-25	1.3339e-22
Tiam2	766.836	1.796	0.173885	10.3287	5.2288e-25	1.64196e-22
Plch2	507.311	3.02559	0.293769	10.2992	7.10404e-25	2.18233e-22
Gem	353.05	-3.33562	0.324623	-10.2754	9.09841e-25	2.73552e-22
Crh	140.292	-2.99205	0.291422	-10.2671	9.91781e-25	2.91976e-22
Grin2c	466.68	2.00981	0.196295	10.2387	1.33007e-24	3.83577e-22
Srgn	483.281	-2.02817	0.198211	-10.2324	1.42001e-24	4.01323e-22
Thbs1	619.707	-4.28289	0.419876	-10.2004	1.97518e-24	5.4728e-22
Angpt2	170.444	-3.36637	0.330607	-10.1824	2.37618e-24	6.45727e-22
Abcd2	497.698	2.89349	0.28438	10.1747	2.57189e-24	6.85723e-22
Errfi1	1077.28	-1.70063	0.167769	-10.1367	3.79773e-24	9.77501e-22
Iqsec2	1871.48	1.74749	0.172396	10.1365	3.80458e-24	9.77501e-22
Cxcl1	174.328	-5.40302	0.534377	-10.1109	4.94397e-24	1.24756e-21
Nwd2	405.86	2.29879	0.229297	10.0254	1.17934e-23	2.92374e-21
Mef2c	4240.61	1.78002	0.178098	9.9946	1.60939e-23	3.92108e-21
Tgm2	841.889	-2.4194	0.243996	-9.91574	3.55627e-23	8.51756e-21
Abi3bp	297.348	-3.79981	0.383373	-9.91152	3.7095e-23	8.73649e-21
Tst	254.578	2.16843	0.219101	9.89692	4.29273e-23	9.94435e-21
Slc13a5	219.156	2.73642	0.27673	9.8884	4.67449e-23	1.06541e-20
Nt5e	337.037	-1.8614	0.18848	-9.87584	5.29886e-23	1.18854e-20
Rasl11b	540.563	1.75683	0.178492	9.84265	7.3741e-23	1.62818e-20
Lrg1	147.484	-2.4609	0.250433	-9.82656	8.65256e-23	1.88107e-20
Lix1	339.005	2.10489	0.215254	9.77863	1.39085e-22	2.97788e-20
Fcgr2a	671.858	-1.96703	0.201215	-9.77579	1.43038e-22	3.01682e-20
Col18a1	404.253	-2.22563	0.227788	-9.77065	1.50479e-22	3.12709e-20
Dbp	786.113	2.8677	0.293707	9.76383	1.60966e-22	3.29655e-20
Atf3	241.68	-4.25854	0.436512	-9.75585	1.74142e-22	3.51543e-20
Dclk3	309.956	3.18088	0.326591	9.73964	2.04267e-22	4.06549e-20
Ankrd34a	432.274	2.28067	0.234712	9.71687	2.55506e-22	4.9798e-20
Slc39a14	973.504	-1.58379	0.163006	-9.71618	2.57254e-22	4.9798e-20
Cd93	876.749	-2.91697	0.300474	-9.70788	2.79094e-22	5.32956e-20
Krt26	118.944	2.50737	0.259954	9.64547	5.13768e-22	9.68008e-20
Itga1	301.547	-2.37748	0.247211	-9.61721	6.76442e-22	1.25774e-19
Gipr	236.41	-3.57008	0.371555	-9.60847	7.3633e-22	1.35131e-19
Nptx2	3071.42	-2.74384	0.28563	-9.60627	7.52277e-22	1.36288e-19
Slitrk4	944.686	1.46091	0.152348	9.58926	8.87177e-22	1.58692e-19
Nwd1	805.095	2.46593	0.259969	9.48548	2.41273e-21	4.26178e-19
Chrm1	733.061	2.31927	0.244715	9.47743	2.60627e-21	4.49137e-19
Lrtm2	246.292	2.60791	0.275142	9.4784	2.58209e-21	4.49137e-19
Enpp3	147.299	-3.44478	0.363608	-9.4739	2.69586e-21	4.58978e-19
Myc	350.808	-2.75531	0.290883	-9.47222	2.73959e-21	4.6087e-19
Pla1a	219.368	-2.2464	0.23738	-9.46333	2.98294e-21	4.95904e-19
Csrnp1	694.541	-2.66563	0.281775	-9.46013	3.07561e-21	5.05366e-19
Dusp26	1967.87	-1.59706	0.168854	-9.4582	3.1329e-21	5.08863e-19
Akr1b8	68.1608	-5.21471	0.552385	-9.44035	3.71539e-21	5.96616e-19
Abca7	748.889	-1.62726	0.173153	-9.39785	5.56871e-21	8.84174e-19
Nt5c1a	271.681	2.41052	0.257806	9.35011	8.75544e-21	1.3596e-18
P2ry12	237.674	3.07037	0.328361	9.35061	8.71434e-21	1.3596e-18
Per3	523.453	1.66311	0.177941	9.34639	9.06901e-21	1.39298e-18
Ccdc141	271.388	2.01488	0.215677	9.34214	9.44095e-21	1.43452e-18
Tfpi2	102.559	-5.81769	0.626481	-9.28629	1.59754e-20	2.40158e-18
Angptl4	255.27	-1.61767	0.174635	-9.26312	1.98541e-20	2.95324e-18
Il1rn	232.841	-4.68801	0.506257	-9.26014	2.04169e-20	3.00532e-18
Pygm	1278.71	1.77305	0.191797	9.24443	2.36502e-20	3.44536e-18
Pcdh20	627.433	2.88182	0.312245	9.22933	2.72319e-20	3.92667e-18
Abhd8	1722.27	1.45377	0.157638	9.22217	2.91137e-20	4.15561e-18
Pxn	899.542	-1.62169	0.176185	-9.20451	3.43225e-20	4.85011e-18
Tmem176b	606.939	1.5274	0.166782	9.15805	5.28456e-20	7.39368e-18
Mmp9	713.447	-1.97184	0.215801	-9.13731	6.40258e-20	8.87008e-18
Rgs1	126.832	-3.63702	0.398104	-9.13586	6.48867e-20	8.90207e-18
Tgfb1	302.577	-2.14822	0.235299	-9.12972	6.86786e-20	9.3317e-18
Npy	1096.08	-2.17677	0.239037	-9.10641	8.51514e-20	1.14598e-17
Fn3k	266.972	2.39743	0.263461	9.09976	9.0535e-20	1.20693e-17
Gria4	1427.06	1.28604	0.14143	9.09314	9.62157e-20	1.27068e-17
Cdh7	226.172	2.00172	0.221378	9.04207	1.53728e-19	2.01142e-17
Lrrk2	753.186	1.85976	0.205712	9.04057	1.55859e-19	2.02059e-17
Rapgefl1	1689.44	1.71684	0.189971	9.03735	1.60509e-19	2.06195e-17
Grm5	1442.42	2.27315	0.252358	9.00765	2.10523e-19	2.68009e-17
Il4r	400.524	-2.26124	0.251132	-9.00418	2.17274e-19	2.74134e-17
Arhgap31	607.43	-1.84132	0.205023	-8.98105	2.6819e-19	3.3538e-17
Phlda1	500.814	-2.12123	0.236464	-8.97062	2.94853e-19	3.65488e-17
Atf4	3641.38	-1.36785	0.152898	-8.94615	3.68104e-19	4.5232e-17
Pkp1	193.52	-2.52605	0.282977	-8.92672	4.38827e-19	5.34574e-17
Slfn2	226.881	-2.28637	0.256197	-8.92428	4.48603e-19	5.41813e-17
Anxa1	242.845	-2.3263	0.260725	-8.92242	4.562e-19	5.46319e-17
Tril	549.914	3.0604	0.343248	8.916	4.83426e-19	5.74059e-17
Hapln1	214.094	2.31954	0.261942	8.85516	8.35675e-19	9.84077e-17
Pou4f3	146.981	-5.61375	0.634318	-8.85004	8.74853e-19	1.0217e-16
Ctsl	2631.83	-1.13178	0.127962	-8.84465	9.18129e-19	1.06345e-16
Pi4k2a	1204.94	-1.0583	0.119757	-8.83705	9.8281e-19	1.12911e-16
Lgi4	838.608	1.44866	0.164012	8.83263	1.02239e-18	1.16511e-16
Kcnj4	662.701	1.85284	0.209853	8.82921	1.05419e-18	1.19174e-16
Thbd	443.241	-2.61087	0.296035	-8.81947	1.15002e-18	1.28976e-16
Ppip5k2	777.319	1.12324	0.127541	8.80693	1.28624e-18	1.43117e-16
Sh2d5	1015.73	-1.1891	0.135262	-8.79109	1.48112e-18	1.63513e-16
Ecscr	80.7355	-4.22494	0.481855	-8.76808	1.81731e-18	1.99073e-16
Clec7a	90.0185	-4.78156	0.546906	-8.74294	2.27129e-18	2.46889e-16
Gal	101.369	-4.16271	0.476626	-8.7337	2.46484e-18	2.65883e-16
Tmem176a	266.281	1.5277	0.174991	8.73012	2.54409e-18	2.72353e-16
Olr59	217.697	3.08942	0.354585	8.71276	2.96562e-18	3.15092e-16
Arhgap32	3978.69	1.6348	0.187759	8.70691	3.12266e-18	3.29301e-16
Nfkbia	696.488	-1.63059	0.187443	-8.69909	3.34547e-18	3.50184e-16
Tmem164	530.225	1.5517	0.178752	8.68074	3.93186e-18	4.08538e-16
Lamc1	2150.3	-1.42076	0.163752	-8.6763	4.08857e-18	4.2172e-16
Pbx1	2045.33	1.27284	0.146723	8.67514	4.1305e-18	4.22957e-16
Cxcl2	92.9445	-6.68375	0.771453	-8.66385	4.56099e-18	4.63679e-16
Kctd4	221.525	2.73379	0.316345	8.64181	5.53299e-18	5.58476e-16
Hk3	64.5869	-5.01967	0.58135	-8.6345	5.89866e-18	5.91163e-16
Cc2d2a	513.129	1.86291	0.216158	8.61829	6.79592e-18	6.7629e-16
Il17ra	622.578	-1.30422	0.151709	-8.59686	8.19299e-18	8.09616e-16
Rfx4	155.625	2.211	0.257756	8.57789	9.66258e-18	9.48208e-16
Fgf1	585.023	-3.0263	0.354696	-8.53209	1.43731e-17	1.40073e-15
Plxnb1	1126.11	1.83632	0.215445	8.52337	1.54972e-17	1.49993e-15
Runx3	68.1564	-5.22958	0.613618	-8.52254	1.56093e-17	1.50051e-15
Cttnbp2nl	1280.11	-1.22416	0.143971	-8.50282	1.85048e-17	1.76683e-15
Hif1a	2965.66	-1.45418	0.171501	-8.47916	2.26828e-17	2.15121e-15
Kcnh3	720.235	2.03553	0.240707	8.45647	2.75599e-17	2.59632e-15
Fcho1	487.923	1.82222	0.215651	8.44986	2.91662e-17	2.72946e-15
Grm1	475.297	1.86196	0.220778	8.43364	3.35079e-17	3.11514e-15
Pde8b	396.016	1.48121	0.175732	8.42877	3.49307e-17	3.22542e-15
Rgl1	905.687	1.07137	0.12712	8.42804	3.51507e-17	3.22542e-15
Mmrn2	225.575	-1.83964	0.218713	-8.41118	4.05903e-17	3.70053e-15
P2ry13	73.1298	4.28449	0.509559	8.40823	4.16245e-17	3.77048e-15
Fbn1	478.676	-2.4739	0.294497	-8.40044	4.44812e-17	4.00112e-15
Gabra2	1363.21	1.65046	0.196489	8.39977	4.47369e-17	4.00112e-15
Sec14l2	885.97	1.46675	0.174711	8.39528	4.64778e-17	4.13068e-15
Pnoc	145.472	-2.12895	0.254123	-8.37762	5.40075e-17	4.76987e-15
Plppr3	147.604	2.14256	0.255875	8.37348	5.59396e-17	4.90983e-15
Ldlr	1076.98	-1.6425	0.196351	-8.36511	6.00608e-17	5.23901e-15
Gabrd	310.626	1.97117	0.235954	8.35408	6.59471e-17	5.71717e-15
Kcnj10	3732.64	2.45367	0.293801	8.35146	6.74256e-17	5.8097e-15
Clic1	1221.24	-1.53628	0.184426	-8.33005	8.08112e-17	6.92087e-15
Lamb3	99.6605	-3.11814	0.376286	-8.28661	1.1652e-16	9.91894e-15
Rnf19b	1160.58	-1.47934	0.17858	-8.28389	1.19219e-16	1.00879e-14
Flt4	80.8829	-2.90576	0.350815	-8.28289	1.20223e-16	1.01123e-14
Klf6	1811.04	-1.30839	0.158095	-8.27601	1.27373e-16	1.06503e-14
Shroom2	1238.37	2.50231	0.302846	8.26267	1.42453e-16	1.18412e-14
Slc30a3	615.953	2.24215	0.272065	8.24123	1.70444e-16	1.40851e-14
Slc6a11	435.035	2.50907	0.305828	8.20418	2.3217e-16	1.90744e-14
Cables2	1228.72	-1.57048	0.191547	-8.19893	2.42546e-16	1.98116e-14
Nos3	335.758	-2.18985	0.26712	-8.19798	2.44462e-16	1.98534e-14
Slc22a3	47.5389	4.18491	0.510612	8.19587	2.48789e-16	2.00893e-14
Fam163a	397.082	2.78521	0.340709	8.17475	2.96471e-16	2.38036e-14
Eng	887.857	-2.42026	0.297457	-8.13649	4.06895e-16	3.24849e-14
Hephl1	65.7277	-4.13849	0.511469	-8.09138	5.89944e-16	4.68343e-14
Fam83g	121.069	-4.65566	0.576188	-8.08011	6.47082e-16	5.10833e-14
Slc66a2	400.097	-1.29884	0.161223	-8.05614	7.87394e-16	6.18148e-14
Clec2g	707.766	-1.59455	0.198253	-8.04299	8.7671e-16	6.84464e-14
Slc38a3	486.541	1.99672	0.24838	8.03896	9.06067e-16	7.03496e-14
Lbh	166.055	-1.70196	0.211797	-8.03581	9.29615e-16	7.17835e-14
Nat8f3	449.458	3.4522	0.430217	8.02434	1.02074e-15	7.83916e-14
Pgap6	572.909	-1.33295	0.166306	-8.01502	1.10117e-15	8.41113e-14
Birc2	844.765	-1.11122	0.138656	-8.01424	1.10824e-15	8.41966e-14
Dse	311.499	-1.64118	0.204904	-8.0095	1.15174e-15	8.70331e-14
Enho	199.474	2.00684	0.251249	7.98742	1.37791e-15	1.03022e-13
Map2k6	205.843	2.9539	0.369807	7.98768	1.37498e-15	1.03022e-13
Egr2	91.7508	-2.6391	0.331409	-7.96328	1.67543e-15	1.24608e-13
Tinagl1	182.587	-2.27606	0.286208	-7.95245	1.82862e-15	1.35289e-13
Tgfb3	319.379	-2.10049	0.264962	-7.92751	2.23587e-15	1.64558e-13
Il1b	69.6169	-5.24831	0.662433	-7.92277	2.32269e-15	1.70062e-13
Cemip2	1084.61	-1.39509	0.17613	-7.92079	2.36004e-15	1.71906e-13
RGD1566085	378.279	1.18044	0.149218	7.91086	2.55625e-15	1.85243e-13
Kdm6b	769.019	-1.67712	0.212431	-7.89489	2.90573e-15	2.09494e-13
Tmem14a	373.651	1.76257	0.223319	7.8926	2.95958e-15	2.12294e-13
Col4a2	2264.8	-1.71349	0.217403	-7.88165	3.23089e-15	2.30584e-13
Trpm3	696.407	1.911	0.242665	7.87506	3.40578e-15	2.41844e-13
Homer3	510.896	-1.63122	0.207157	-7.87435	3.4253e-15	2.42015e-13
Lsp1	328.82	-2.50102	0.317916	-7.86693	3.63454e-15	2.55521e-13
Ston2	256.845	1.36973	0.174468	7.85091	4.13014e-15	2.88926e-13
Il1r2	61.7054	-5.25882	0.671133	-7.83574	4.66086e-15	3.22856e-13
Mcoln3	48.9593	-3.38994	0.432595	-7.83628	4.64085e-15	3.22856e-13
Raver2	130.05	1.80958	0.231008	7.8334	4.74849e-15	3.27322e-13
Agrn	1570.67	1.27029	0.162387	7.82262	5.17331e-15	3.54874e-13
Gpr37l1	1489.75	1.75295	0.224164	7.81992	5.28558e-15	3.60824e-13
Nuak1	1227.55	1.07595	0.137716	7.81282	5.59239e-15	3.79933e-13
Ap1g2	2169.25	2.03507	0.260691	7.80643	5.88316e-15	3.97775e-13
Dysf	107.905	-2.91718	0.37372	-7.8058	5.91242e-15	3.9785e-13
Mfsd9	335.573	-1.56741	0.200926	-7.80093	6.1454e-15	4.11567e-13
Slc4a4	869.82	1.94035	0.248895	7.79586	6.39709e-15	4.26402e-13
Plcd4	148.263	2.18583	0.280853	7.78284	7.09168e-15	4.70481e-13
Klf10	905.11	-1.75335	0.225355	-7.78039	7.23e-15	4.77416e-13
Kcng4	94.7005	3.38177	0.434906	7.77586	7.4935e-15	4.92515e-13
Itgax	224.017	-3.2772	0.421549	-7.77417	7.59448e-15	4.96841e-13
Grem1	294.477	-1.86387	0.239863	-7.77056	7.81401e-15	5.08847e-13
Atp1b2	4678.85	1.57113	0.202317	7.76569	8.11998e-15	5.26346e-13
Sox11	213.061	-2.31489	0.298136	-7.76454	8.19394e-15	5.28715e-13
Rgma	536.529	1.2652	0.162994	7.76222	8.34544e-15	5.36043e-13
Cpne6	762.526	2.24619	0.289695	7.75363	8.93031e-15	5.71014e-13
Kcnk1	784.444	1.63843	0.211601	7.74304	9.70703e-15	6.17883e-13
Rhoj	161.602	-2.41713	0.312328	-7.73906	1.00151e-14	6.34634e-13
Gjb6	331.551	3.28732	0.427114	7.69658	1.39761e-14	8.8168e-13
Lrp1b	935.116	1.39574	0.181871	7.67432	1.66293e-14	1.04439e-12
Cdkn1a	461.013	-2.34489	0.306235	-7.65717	1.90079e-14	1.18677e-12
Sccpdh	2697.11	-1.00263	0.130947	-7.65679	1.90642e-14	1.18677e-12
Xirp1	133.629	-3.43998	0.449391	-7.65475	1.93686e-14	1.20043e-12
Slc1a5	228.416	-2.582	0.337402	-7.65258	1.96983e-14	1.21553e-12
Cntn5	100.342	1.91134	0.2498	7.6515	1.98652e-14	1.2205e-12
Flrt1	885.55	1.52605	0.199531	7.64819	2.03835e-14	1.24692e-12
Rasl10b	409.328	1.37993	0.180481	7.64586	2.07556e-14	1.26421e-12
Shank2	2346.22	1.40532	0.183865	7.64319	2.11897e-14	1.28511e-12
Smarca2	2169.89	1.5415	0.201734	7.64124	2.15132e-14	1.29636e-12
Srgap1	736.725	-1.72643	0.225944	-7.64097	2.15585e-14	1.29636e-12
Dll4	96.7689	-2.48531	0.32581	-7.62808	2.38273e-14	1.42671e-12
Prr36	584.24	1.11653	0.146493	7.62171	2.50346e-14	1.49267e-12
Haus8	100.356	-2.12604	0.27918	-7.61529	2.6309e-14	1.56207e-12
Tnfrsf26	58.0298	-3.41734	0.44978	-7.59779	3.01234e-14	1.78106e-12
Cacnb2	642.432	1.43214	0.18864	7.59188	3.15285e-14	1.85637e-12
Nacc2	432.331	1.24093	0.163549	7.58754	3.26034e-14	1.90654e-12
Ralgps1	817.895	1.30209	0.171614	7.58735	3.26503e-14	1.90654e-12
Slco2a1	192.595	-3.38792	0.446619	-7.5857	3.30691e-14	1.92304e-12
Kctd1	705.535	1.48058	0.195251	7.58294	3.37808e-14	1.95638e-12
Gria2	9449.36	1.39462	0.184165	7.57269	3.65576e-14	2.10855e-12
Mustn1	296.135	-2.23605	0.295425	-7.5689	3.76388e-14	2.16209e-12
Gprin3	212.076	1.98332	0.262416	7.55794	4.09494e-14	2.34274e-12
Sez6l2	3080.43	1.13803	0.150732	7.55	4.35272e-14	2.48017e-12
Gch1	74.2174	-3.26379	0.432973	-7.5381	4.7686e-14	2.70623e-12
Dars2	47.0934	6.22833	0.826685	7.53411	4.91693e-14	2.77925e-12
Cyp2j4	195.847	1.69112	0.224535	7.53165	5.01041e-14	2.8208e-12
Thrsp	257.367	2.0942	0.27832	7.52444	5.29484e-14	2.9691e-12
Il6	108.836	-4.3799	0.582862	-7.51446	5.71444e-14	3.19173e-12
Ppm1k	861.825	1.20746	0.160722	7.51276	5.7894e-14	3.22087e-12
Ephx4	539.67	1.60472	0.21365	7.511	5.86771e-14	3.25163e-12
Stac2	4698.57	-1.11814	0.148928	-7.50794	6.00643e-14	3.3155e-12
Btbd17	54.4603	5.62483	0.749323	7.50655	6.07058e-14	3.32494e-12
Tll1	496.673	-2.95634	0.39383	-7.50664	6.06663e-14	3.32494e-12
Fras1	372.752	1.47252	0.19624	7.50366	6.20592e-14	3.38594e-12
Tef	3967.68	1.41101	0.188293	7.49373	6.69446e-14	3.63844e-12
Neurod1	71.5431	3.13086	0.417879	7.49227	6.76901e-14	3.66486e-12
Elmod1	2195.63	1.37031	0.182962	7.48959	6.90901e-14	3.71221e-12
Nat8f4	263.1	1.67391	0.223485	7.49005	6.88476e-14	3.71221e-12
Ehd4	485.211	-1.71633	0.2292	-7.48836	6.97394e-14	3.7329e-12
Rgs12	583.072	1.67776	0.224129	7.48568	7.1176e-14	3.79543e-12
Hrh3	984.608	1.33558	0.178441	7.48474	7.16862e-14	3.80826e-12
Ptprb	1298.71	-1.04318	0.139417	-7.48244	7.29528e-14	3.86103e-12
Rhobtb2	609.429	1.20119	0.160636	7.47774	7.56099e-14	3.98673e-12
Slco1c1	733.008	2.59051	0.34647	7.47688	7.61074e-14	3.99805e-12
Alkal2	70.4385	-3.48614	0.466343	-7.47548	7.69209e-14	4.02581e-12
Ifrd1	1493.55	-1.48111	0.198186	-7.47334	7.81874e-14	4.077e-12
Dpysl3	664.327	-1.29128	0.172937	-7.46676	8.21937e-14	4.27015e-12
Nop56	1274.04	-1.0247	0.137505	-7.45215	9.18325e-14	4.75343e-12
Nr1d1	1167.76	1.10963	0.149034	7.44544	9.66213e-14	4.97104e-12
Slfn4	197.298	-3.28078	0.440652	-7.44528	9.67401e-14	4.97104e-12
C1qtnf4	723.8	1.48328	0.199322	7.44163	9.94501e-14	5.09177e-12
Tmem145	435.789	1.8022	0.242228	7.44009	1.00616e-13	5.13285e-12
Ypel2	1029.87	1.24852	0.167915	7.43541	1.04247e-13	5.29899e-12
Sertad1	286.264	-1.39965	0.188356	-7.43089	1.07872e-13	5.4636e-12
Gimap8	135.069	-1.96479	0.264879	-7.41771	1.19161e-13	6.0138e-12
Cln8	490.128	-1.25462	0.169396	-7.40644	1.29736e-13	6.52422e-12
Atp2b2	6454.78	1.34731	0.18208	7.39957	1.36631e-13	6.81515e-12
Ccn1	495.581	-3.14089	0.424488	-7.39924	1.36968e-13	6.81515e-12
Cspg5	1221.41	1.38463	0.187125	7.39951	1.36688e-13	6.81515e-12
Trpv4	38.1592	-5.11478	0.692785	-7.38293	1.54842e-13	7.67746e-12
Anpep	165.654	-2.49083	0.337644	-7.37707	1.61809e-13	7.99482e-12
Neurod6	667.738	2.72069	0.369063	7.37188	1.68238e-13	8.28351e-12
Zfp367	807.573	-1.17429	0.159386	-7.36758	1.73747e-13	8.52507e-12
Nr1d2	2030.83	0.968891	0.131556	7.36487	1.77319e-13	8.67023e-12
Itgb1	2567.9	-0.929735	0.126273	-7.36292	1.79933e-13	8.7677e-12
Myo1c	811.067	-1.3845	0.188081	-7.36122	1.82243e-13	8.81944e-12
Selp	73.8582	-5.88695	0.799678	-7.36164	1.8166e-13	8.81944e-12
Bdnf	504.24	-1.73991	0.236912	-7.34414	2.07093e-13	9.98783e-12
Slitrk2	860.133	1.23956	0.168835	7.34185	2.10654e-13	1.0125e-11
Gpatch2l	720.056	-1.25646	0.171151	-7.34122	2.11662e-13	1.0139e-11
Map3k6	102.6	-2.70438	0.368664	-7.33563	2.20676e-13	1.05351e-11
Lcat	106.632	2.33114	0.317868	7.33368	2.23916e-13	1.06537e-11
Tmem266	69.3425	2.50688	0.342641	7.31634	2.54822e-13	1.20835e-11
Gpat3	384.596	-1.9571	0.267647	-7.31222	2.6276e-13	1.24183e-11
Uap1	610.289	-1.33575	0.182745	-7.30936	2.6842e-13	1.26435e-11
Lyz2	1245.58	-2.72919	0.373828	-7.30067	2.86341e-13	1.34428e-11
Inpp5j	394.022	1.23246	0.168837	7.29972	2.88376e-13	1.34935e-11
Slc39a10	3809.67	1.10184	0.15103	7.29552	2.97511e-13	1.3875e-11
Ddost	1490.84	-0.848372	0.116379	-7.28976	3.10505e-13	1.44334e-11
Bcl2a1	96.7712	-3.13802	0.431275	-7.27615	3.43476e-13	1.59136e-11
Rapgef3	319.432	1.48154	0.203678	7.27392	3.49214e-13	1.61266e-11
Grm3	985.499	2.49893	0.343861	7.26727	3.66835e-13	1.68852e-11
Ednra	162.441	-1.66669	0.229543	-7.2609	3.84515e-13	1.76415e-11
Fgr	189.314	-2.23344	0.308217	-7.2463	4.28296e-13	1.95505e-11
Srgap3	1355.87	1.34558	0.185696	7.24612	4.2889e-13	1.95505e-11
Enpep	165.25	-1.84546	0.254897	-7.24002	4.48614e-13	2.03838e-11
Prkcd	923.279	-2.30933	0.319244	-7.23375	4.69832e-13	2.12795e-11
Sptb	2353.64	1.11378	0.154093	7.22793	4.90397e-13	2.21399e-11
Kcnd2	953.401	1.67839	0.232274	7.22589	4.97833e-13	2.24041e-11
Cacng3	755.466	1.91739	0.266213	7.20247	5.91321e-13	2.65268e-11
Cldn10	135.614	2.69252	0.374337	7.19277	6.34913e-13	2.83923e-11
Plekhd1	168.084	1.5702	0.218396	7.18969	6.49369e-13	2.89471e-11
Ipo5	5917.43	-1.16168	0.161734	-7.18266	6.83686e-13	3.0381e-11
Unc13b	733.913	1.05287	0.146638	7.18011	6.96551e-13	3.08557e-11
Mtss2	1673.73	1.24104	0.172939	7.17618	7.16854e-13	3.16558e-11
Sec16b	91.5431	-1.91659	0.267126	-7.17484	7.23936e-13	3.1869e-11
Il2rg	97.7622	-3.27673	0.456759	-7.17387	7.29092e-13	3.19963e-11
Has2	78.9484	-3.16511	0.4415	-7.16899	7.55537e-13	3.30542e-11
Gpr4	146.188	-1.97948	0.276464	-7.16	8.06778e-13	3.5187e-11
Sfn	57.2739	-3.20497	0.447842	-7.15649	8.27712e-13	3.59889e-11
Cdh10	692.005	1.61613	0.226023	7.1503	8.65861e-13	3.75321e-11
Gprasp1	5407.91	0.923336	0.129207	7.14617	8.923e-13	3.85599e-11
Cd53	340.769	-1.7305	0.242214	-7.14451	9.03195e-13	3.89115e-11
Tnfaip3	422.446	-1.6608	0.232472	-7.14409	9.05942e-13	3.89115e-11
Pxdc1	201.121	-2.43974	0.341817	-7.13757	9.49964e-13	4.06786e-11
Gfpt1	3354.89	-0.895802	0.125714	-7.12574	1.03523e-12	4.4196e-11
Mcam	1172.93	-1.76775	0.248174	-7.12301	1.05595e-12	4.49447e-11
Fstl5	577.092	1.63721	0.229937	7.12027	1.07715e-12	4.57094e-11
Maml2	335.004	-1.12828	0.158479	-7.11943	1.08375e-12	4.57149e-11
Rbm24	131.496	1.69036	0.237426	7.11953	1.08297e-12	4.57149e-11
Snn	2486.05	0.919302	0.129179	7.11651	1.10698e-12	4.65558e-11
Ngfr	56.0043	-4.06035	0.571027	-7.1106	1.15539e-12	4.84474e-11
Lcp1	1161.34	-2.00784	0.282495	-7.10753	1.18135e-12	4.93897e-11
Gnb5	1254.72	0.768647	0.108197	7.10417	1.2105e-12	5.04591e-11
Slc6a1	3267.05	1.62367	0.228648	7.10119	1.23684e-12	5.14051e-11
Nrsn2	432.463	1.29072	0.181898	7.09584	1.28571e-12	5.32795e-11
Gli1	65.0192	4.3157	0.608525	7.09207	1.32124e-12	5.45919e-11
Gpr3	75.0861	-2.15651	0.304111	-7.09118	1.32974e-12	5.46239e-11
Uox	35.5254	-4.40288	0.620861	-7.09157	1.32598e-12	5.46239e-11
Sorcs3	1827.44	-1.86712	0.263798	-7.07782	1.46442e-12	5.99817e-11
Ptgs1	442.111	-2.6529	0.374917	-7.07597	1.48409e-12	6.06117e-11
Bcl6	1066.03	-1.29458	0.183338	-7.06115	1.65134e-12	6.72481e-11
Cmpk2	240.424	1.36116	0.192973	7.05363	1.74311e-12	7.07814e-11
Txnrd1	2244.08	-1.24354	0.176472	-7.04671	1.83201e-12	7.4178e-11
Ctsk	597.276	-1.63369	0.232032	-7.04079	1.91158e-12	7.71788e-11
Igdcc4	1218.73	1.17258	0.166606	7.03807	1.94924e-12	7.84749e-11
Gpr22	806.405	1.17983	0.167654	7.03724	1.96081e-12	7.87165e-11
Ildr2	901.594	1.36012	0.193444	7.03105	2.04984e-12	8.20575e-11
Cxcl3	66.1124	-9.3912	1.33609	-7.02886	2.08226e-12	8.312e-11
Noct	972.465	-1.82291	0.259396	-7.02754	2.10207e-12	8.36743e-11
Tcerg1l	162.03	1.61465	0.229815	7.02588	2.12719e-12	8.44363e-11
Slc25a23	3788.76	1.39499	0.198601	7.02408	2.15488e-12	8.52958e-11
Mrc1	165.503	-1.83011	0.260592	-7.02288	2.17347e-12	8.57913e-11
Igfbp2	457.626	1.55959	0.222326	7.0149	2.30117e-12	9.0579e-11
Cux2	835.767	1.90124	0.271076	7.01368	2.32138e-12	9.11205e-11
Rps6ka3	2331.29	-0.840086	0.119847	-7.00964	2.3893e-12	9.35269e-11
Kctd10	683.685	-0.92828	0.132464	-7.00778	2.42131e-12	9.4518e-11
A3galt2	513.815	-3.04763	0.43496	-7.00668	2.44032e-12	9.49977e-11
Dab2	774.318	-1.72231	0.245947	-7.00278	2.50933e-12	9.74159e-11
Plaat1	135.31	1.58005	0.22583	6.99662	2.62206e-12	1.01513e-10
Plxna3	461.613	1.5273	0.218586	6.98718	2.8047e-12	1.08287e-10
Dgkb	1496.49	1.48887	0.213237	6.98226	2.9047e-12	1.11843e-10
Lzts1	1962.57	1.36606	0.195857	6.9748	3.06308e-12	1.17621e-10
Dnajb9	1075.7	-0.875369	0.12566	-6.96619	3.25633e-12	1.24443e-10
Pde4b	2115.75	-1.24517	0.178747	-6.96611	3.25835e-12	1.24443e-10
Dcx	792.097	2.17829	0.312866	6.96236	3.34622e-12	1.27454e-10
Klhl13	512.208	1.1073	0.159188	6.95594	3.50214e-12	1.33034e-10
Negr1	797.011	1.25522	0.180792	6.94286	3.84237e-12	1.45529e-10
Pitpnm2	2930.67	1.26746	0.182565	6.94252	3.85167e-12	1.45529e-10
Cited2	905.319	-0.98713	0.142324	-6.93581	4.03907e-12	1.52203e-10
Lmo7	800.439	1.47158	0.212195	6.93503	4.06134e-12	1.52635e-10
Pfn1	2543.08	-0.995932	0.143626	-6.93423	4.0845e-12	1.53098e-10
Tnip2	332.765	-2.42165	0.349404	-6.93078	4.18512e-12	1.56455e-10
Flna	2391.87	-1.85033	0.26716	-6.9259	4.33214e-12	1.61524e-10
Ccng2	517.732	1.03369	0.149706	6.90481	5.02699e-12	1.86938e-10
Krt17	63.5352	-9.33362	1.35563	-6.88508	5.77562e-12	2.14214e-10
Slc8a2	1902.17	2.03595	0.295959	6.87917	6.02022e-12	2.22701e-10
Rwdd1	559.739	-1.13995	0.165775	-6.87652	6.13303e-12	2.26282e-10
Spred3	954.979	-1.4665	0.213374	-6.87294	6.28939e-12	2.31446e-10
Fam107a	5903.03	2.54188	0.369904	6.87174	6.34253e-12	2.32796e-10
Runx1	133.378	-2.51967	0.366995	-6.86568	6.61772e-12	2.42267e-10
Lias	280.325	1.17564	0.171277	6.86401	6.69519e-12	2.44469e-10
Luzp2	880.367	1.86192	0.271329	6.86223	6.77926e-12	2.46901e-10
Bgn	776.647	-1.51665	0.221096	-6.85967	6.9022e-12	2.50733e-10
Fndc5	859.558	1.14181	0.166471	6.8589	6.93944e-12	2.51439e-10
S100a11	65.0648	-3.07244	0.448652	-6.84817	7.48009e-12	2.70335e-10
Tiparp	457.37	-1.22959	0.17965	-6.84438	7.68066e-12	2.76876e-10
Myo18b	62.0059	-2.69554	0.393887	-6.84344	7.7312e-12	2.77989e-10
Cystm1	489.131	-1.30751	0.191333	-6.83367	8.27695e-12	2.96857e-10
Dennd2c	127.931	-2.09209	0.306369	-6.82865	8.57202e-12	3.06661e-10
Ifitm2	199.931	-1.54875	0.226964	-6.82375	8.86919e-12	3.16491e-10
Olfml2b	240.967	-1.44504	0.211785	-6.82314	8.90706e-12	3.17042e-10
Gal3st3	257.904	1.61443	0.236809	6.81743	9.26847e-12	3.29077e-10
Cxxc4	597.912	1.08691	0.159598	6.81031	9.7392e-12	3.44924e-10
Entpd1	714.769	-1.22466	0.179899	-6.8075	9.93107e-12	3.5084e-10
Cd163	123.493	-2.55109	0.37512	-6.80074	1.04081e-11	3.66775e-10
Pde7b	90.9465	1.90077	0.279705	6.79564	1.07835e-11	3.79057e-10
Cxcr2	52.1122	-5.36806	0.790503	-6.79069	1.11599e-11	3.90964e-10
Dpp10	1046.27	1.63661	0.241016	6.79046	1.11775e-11	3.90964e-10
Slpi	85.9737	-7.9152	1.16671	-6.78422	1.16718e-11	4.07244e-10
Usp2	311.38	1.6898	0.2491	6.78364	1.17187e-11	4.07875e-10
Itga2	51.8592	-4.71935	0.696392	-6.77687	1.22808e-11	4.26387e-10
Nasp	668.111	-1.36749	0.201799	-6.77649	1.23133e-11	4.26468e-10
Myorg	428.199	1.76049	0.260061	6.76952	1.2921e-11	4.46423e-10
Ets1	712.444	-1.55167	0.22964	-6.75699	1.40888e-11	4.85581e-10
Sigmar1	671.819	-1.06283	0.157425	-6.75132	1.46508e-11	5.03723e-10
Frem2	79.244	2.28011	0.337864	6.74862	1.49263e-11	5.1195e-10
Otof	262.689	2.71289	0.402274	6.74387	1.54226e-11	5.27654e-10
Sidt1	888.572	1.49003	0.220956	6.74353	1.54588e-11	5.27654e-10
Chrm3	634.165	1.83657	0.272397	6.74224	1.55965e-11	5.3107e-10
Klhl23	972.038	1.12827	0.167395	6.74017	1.58199e-11	5.37384e-10
Flt3	141.86	1.67114	0.248027	6.73774	1.60865e-11	5.45128e-10
Aloxe3	178.264	-2.58927	0.385913	-6.70945	1.95357e-11	6.60429e-10
L3mbtl1	49.2883	2.56607	0.383037	6.69928	2.09446e-11	7.06368e-10
Lilrb4	42.3979	-5.53189	0.827242	-6.68715	2.27554e-11	7.65611e-10
Celf3	826.306	1.20999	0.181174	6.67862	2.41207e-11	8.09619e-10
Tmem255a	285.56	1.4251	0.213572	6.67271	2.51115e-11	8.40877e-10
Dipk1c	59.7225	2.75091	0.412663	6.66624	2.6244e-11	8.76722e-10
Slc7a10	196.059	2.94007	0.441818	6.6545	2.8427e-11	9.47409e-10
Zbtb34	491.725	0.960207	0.144351	6.65191	2.89308e-11	9.61931e-10
Lama5	238.637	-1.73211	0.260737	-6.64311	3.0713e-11	1.01879e-09
Pnma8b	6221.91	1.0444	0.15738	6.63616	3.21957e-11	1.06547e-09
Eya1	235.363	1.34931	0.203354	6.63525	3.23943e-11	1.06954e-09
Aifm3	225.897	2.16018	0.325827	6.62983	3.36068e-11	1.10699e-09
Cflar	526.561	-1.57633	0.237806	-6.62867	3.3873e-11	1.11316e-09
Rbpj	2053.33	-1.4472	0.218463	-6.62444	3.48563e-11	1.14282e-09
Fam171b	4852.73	1.64426	0.248329	6.62131	3.56035e-11	1.16461e-09
Jun	3165.47	-1.76441	0.266511	-6.62039	3.58259e-11	1.16918e-09
Klf15	123.874	2.15348	0.325781	6.6102	3.83792e-11	1.24962e-09
Vwa5a	885.812	-1.84585	0.279503	-6.60406	4.00037e-11	1.29952e-09
Dglucy	66.1093	2.30127	0.34869	6.59977	4.11789e-11	1.33298e-09
Pamr1	291.225	2.39816	0.363378	6.59962	4.12224e-11	1.33298e-09
Zc3h12a	60.8214	-2.45316	0.371998	-6.59456	4.26527e-11	1.37608e-09
Shc4	281.651	-1.31632	0.199947	-6.58336	4.59918e-11	1.48043e-09
Npas2	942.979	1.36832	0.207939	6.58043	4.69102e-11	1.50656e-09
Pdk2	1929.61	1.05353	0.160114	6.57986	4.70906e-11	1.50893e-09
Tacr3	87.1806	2.65552	0.403684	6.57821	4.76132e-11	1.52222e-09
Cables1	367.311	1.71372	0.26054	6.57758	4.78155e-11	1.52524e-09
Bcl11a	639.102	1.32377	0.201458	6.57095	4.99942e-11	1.59115e-09
Gimap9	54.5994	-2.93493	0.446721	-6.56993	5.03406e-11	1.59857e-09
Bmper	543.429	-1.22935	0.187164	-6.5683	5.08914e-11	1.60883e-09
Slc25a18	339.071	2.18409	0.332512	6.56846	5.08367e-11	1.60883e-09
Per2	643.295	1.40778	0.214371	6.56702	5.13324e-11	1.61915e-09
Cdh12	195.741	2.15014	0.327479	6.56572	5.17828e-11	1.62972e-09
Paqr7	625.016	1.315	0.200391	6.56214	5.30402e-11	1.66558e-09
Mrtfb	1079.74	1.37587	0.209777	6.55873	5.42677e-11	1.70035e-09
Tbc1d30	357.693	1.58275	0.241388	6.55687	5.49494e-11	1.7179e-09
Gucy1b1	2722.33	0.974462	0.148684	6.55393	5.60426e-11	1.74436e-09
Itm2b	6045.57	0.908993	0.138688	6.55422	5.59328e-11	1.74436e-09
Itm2a	519.613	1.40486	0.21438	6.55313	5.63423e-11	1.74983e-09
Wdr1	3822.7	-0.802609	0.122499	-6.55196	5.67853e-11	1.75972e-09
Slc12a5	4485.13	1.55366	0.23721	6.54974	5.76384e-11	1.78225e-09
Mapk1	8939.22	1.14834	0.175589	6.53994	6.15428e-11	1.89882e-09
Galnt14	584.188	-1.40021	0.214128	-6.53916	6.18646e-11	1.90459e-09
Elfn2	1138.1	0.85544	0.130896	6.53525	6.3505e-11	1.95085e-09
Tm4sf1	386.939	-1.93419	0.296091	-6.5324	6.47243e-11	1.98399e-09
Nos2	69.6827	-7.02895	1.07614	-6.53161	6.50684e-11	1.99022e-09
Myd88	335.062	-2.09079	0.320276	-6.5281	6.6609e-11	2.03294e-09
Eif6	787.735	-0.84721	0.129885	-6.52277	6.90201e-11	2.10199e-09
Pcdh11x	159.489	1.91259	0.293356	6.51969	7.04544e-11	2.14106e-09
Olfml1	328.422	1.37468	0.211036	6.51394	7.32023e-11	2.21979e-09
Rnf122	103.821	-1.87952	0.288634	-6.51179	7.42602e-11	2.24705e-09
Lnx1	359.555	1.23826	0.19027	6.50789	7.62114e-11	2.30116e-09
Eepd1	166.094	1.53741	0.236301	6.50614	7.71087e-11	2.32329e-09
Akr1b10	247.633	1.97382	0.303493	6.50367	7.83826e-11	2.35665e-09
Cxcl16	486.199	-2.69071	0.414117	-6.49746	8.16889e-11	2.45084e-09
Snx18	985.8	-1.22212	0.188136	-6.49598	8.24962e-11	2.46982e-09
F2rl1	61.8004	-3.25216	0.500772	-6.4943	8.34179e-11	2.49213e-09
B3gnt5	47.7327	-4.71906	0.726736	-6.49349	8.38692e-11	2.50033e-09
Plch1	593.903	-1.79807	0.27692	-6.49312	8.40774e-11	2.50126e-09
Slc47a1	35.738	-3.9927	0.615369	-6.4883	8.68107e-11	2.57715e-09
Piezo1	502.015	-1.91237	0.294763	-6.48782	8.70863e-11	2.57991e-09
Cdh24	164.803	1.35364	0.208762	6.4841	8.92608e-11	2.6388e-09
Fosl1	730.249	-1.08517	0.167418	-6.4818	9.06365e-11	2.67387e-09
Lrrfip2	621.169	-1.10819	0.171105	-6.47665	9.37805e-11	2.76086e-09
Cdh5	442.953	-1.59614	0.246479	-6.47575	9.43392e-11	2.76241e-09
Clcn2	404.647	1.66923	0.257771	6.47563	9.44196e-11	2.76241e-09
Dbx2	104.405	2.22827	0.344088	6.47588	9.42598e-11	2.76241e-09
Dok5	563.051	-1.31759	0.203719	-6.46769	9.95092e-11	2.9053e-09
Ybx3	893.489	-1.51389	0.234131	-6.46601	1.00625e-10	2.93183e-09
Ddah1	1513.61	-1.30385	0.201732	-6.46327	1.02462e-10	2.97919e-09
Rassf2	353.534	1.18254	0.183104	6.45831	1.05882e-10	3.07231e-09
Camkv	2902.95	1.69229	0.262297	6.45183	1.1051e-10	3.18697e-09
Cpne4	478.698	2.08993	0.323908	6.45222	1.10226e-10	3.18697e-09
Osmr	515.16	-2.90481	0.450221	-6.45196	1.10411e-10	3.18697e-09
Frrs1l	2255.24	1.49088	0.231141	6.45007	1.11798e-10	3.21755e-09
Adamtsl1	119.617	-1.84769	0.286614	-6.4466	1.14384e-10	3.28529e-09
Stk32c	914.469	1.17656	0.182524	6.44605	1.148e-10	3.29054e-09
Ppp1r3c	647.885	1.43842	0.223367	6.43975	1.19671e-10	3.42321e-09
Gpld1	249.654	1.15555	0.17947	6.4387	1.20504e-10	3.44008e-09
Itgb2	544.38	-1.7251	0.268114	-6.43421	1.24118e-10	3.53327e-09
Pawr	109.433	-2.07259	0.322129	-6.43403	1.24268e-10	3.53327e-09
Adam11	1069.57	1.96716	0.305782	6.43323	1.24923e-10	3.54475e-09
Calu	2249.67	-0.790565	0.122946	-6.43016	1.27471e-10	3.60981e-09
Rap2b	647.406	1.3874	0.21612	6.41959	1.36645e-10	3.86187e-09
Fjx1	406.312	1.33611	0.208222	6.41676	1.39204e-10	3.92633e-09
Tpm4	1926.96	-1.76432	0.275567	-6.40252	1.52836e-10	4.30224e-09
Bhlhe22	382.035	1.80292	0.281685	6.40048	1.54892e-10	4.35144e-09
Gpr17	784.339	2.52095	0.394531	6.38975	1.66157e-10	4.65867e-09
Eif1a	1397.42	-1.26926	0.198803	-6.38453	1.71921e-10	4.81071e-09
Stc1	121.771	-1.79904	0.282176	-6.37561	1.82233e-10	5.08919e-09
Srebf1	447.268	1.4541	0.228121	6.37426	1.83849e-10	5.1242e-09
Ptch1	642.13	1.19164	0.187009	6.37211	1.8644e-10	5.18619e-09
Ptprc	366.314	-1.67106	0.262472	-6.36662	1.93233e-10	5.3646e-09
Omg	1609.76	1.67502	0.263177	6.36462	1.95775e-10	5.42451e-09
Klhl21	393.949	-0.983422	0.154568	-6.3624	1.98626e-10	5.49272e-09
Rbm15b	1157.29	-0.904693	0.142376	-6.35424	2.09457e-10	5.78094e-09
Gpr165	65.8579	3.09857	0.488132	6.34782	2.18384e-10	6.01389e-09
Vwf	1769.65	-1.02604	0.161643	-6.34757	2.18749e-10	6.01389e-09
Ankrd34c	218.443	2.43829	0.384163	6.34703	2.19518e-10	6.02332e-09
Prmt8	543.251	1.59336	0.25125	6.34173	2.27197e-10	6.22193e-09
Ace	509.218	-1.29272	0.203939	-6.33877	2.31605e-10	6.33039e-09
Glipr1	66.4814	-2.81735	0.444496	-6.33832	2.32289e-10	6.33683e-09
Lgmn	3264.22	-1.22006	0.192701	-6.33137	2.42997e-10	6.61617e-09
Caly	630.346	1.45506	0.23013	6.32279	2.56883e-10	6.9808e-09
Pelo	310.52	-1.15216	0.182436	-6.31541	2.6944e-10	7.30799e-09
Cacna1h	456.895	1.72915	0.274004	6.31068	2.77819e-10	7.52079e-09
Astn1	4204.56	1.12253	0.177952	6.30804	2.82594e-10	7.63543e-09
Amph	3385.12	1.53925	0.244312	6.30033	2.97014e-10	7.97986e-09
Fosl2	629.84	-1.84128	0.292243	-6.30049	2.96702e-10	7.97986e-09
Phactr3	1015.93	1.48563	0.235802	6.30032	2.97035e-10	7.97986e-09
Ttc9	1214.64	-1.23805	0.196572	-6.29821	3.01103e-10	8.07378e-09
Myl4	63.9411	-4.0134	0.637546	-6.29507	3.07257e-10	8.22319e-09
Tmem198	652.413	-0.938682	0.149354	-6.28493	3.28002e-10	8.7618e-09
Tek	525.692	-0.914432	0.145546	-6.28275	3.32626e-10	8.86857e-09
Golm1	389.538	1.30593	0.208334	6.26847	3.64608e-10	9.69278e-09
Loxl4	48.5248	-2.68306	0.428034	-6.26834	3.64911e-10	9.69278e-09
Cul9	831.66	1.16859	0.186546	6.26433	3.74427e-10	9.92688e-09
Plekhg2	157.084	-1.3045	0.208382	-6.26015	3.84609e-10	1.01587e-08
Sowaha	66.4648	2.17437	0.347325	6.26034	3.84135e-10	1.01587e-08
Camkk2	1173.9	1.99246	0.318364	6.25843	3.88867e-10	1.0252e-08
Fbl	560.57	-1.18118	0.189039	-6.24835	4.14808e-10	1.09156e-08
Adgrl3	2096.7	-0.910734	0.145771	-6.24772	4.16497e-10	1.09396e-08
Esam	351.459	-1.4595	0.233978	-6.23777	4.43839e-10	1.16362e-08
Baz1a	303.092	-2.15902	0.346143	-6.23737	4.44997e-10	1.16449e-08
Aqp4	7746.2	1.17463	0.188883	6.21881	5.00928e-10	1.30843e-08
Hmox1	2957.76	-5.1633	0.830603	-6.21632	5.08939e-10	1.32446e-08
RGD1307443	380.633	1.97972	0.318463	6.2165	5.08382e-10	1.32446e-08
Daam2	373.945	2.10018	0.33822	6.20951	5.31503e-10	1.38064e-08
Icam5	925.269	1.54686	0.249317	6.2044	5.49068e-10	1.42365e-08
Shb	194.787	-1.47102	0.237135	-6.20333	5.52819e-10	1.43075e-08
Mgp	419.549	-1.79619	0.28962	-6.20188	5.5792e-10	1.44131e-08
Cnn2	386.329	-1.80112	0.290867	-6.19224	5.93136e-10	1.52949e-08
Ptgfrn	1162.27	1.17093	0.189216	6.18832	6.08098e-10	1.56252e-08
Trib2	417.038	0.976556	0.157807	6.1883	6.08158e-10	1.56252e-08
Trim56	675.197	-0.96026	0.155217	-6.18655	6.14939e-10	1.57708e-08
Tub	384.945	1.07583	0.17391	6.18615	6.16531e-10	1.5783e-08
Notch4	293.879	-1.21625	0.196637	-6.18529	6.19898e-10	1.58405e-08
Maff	265.227	-2.86375	0.463153	-6.18315	6.28336e-10	1.60271e-08
Rtn4r	338.389	1.60612	0.259904	6.17967	6.42341e-10	1.63548e-08
Ttyh1	8168.67	1.01784	0.164736	6.1786	6.46732e-10	1.6437e-08
Prkar2b	1168.28	1.04571	0.16927	6.17779	6.50068e-10	1.64921e-08
Hs3st2	1003.83	-1.75256	0.28371	-6.17731	6.52036e-10	1.65124e-08
Bhlhe41	1032.79	1.07607	0.174321	6.1729	6.70484e-10	1.69492e-08
Cdv3	2119.11	-0.941986	0.152664	-6.17033	6.81481e-10	1.71964e-08
Niban1	123.835	-1.56927	0.254412	-6.1682	6.90703e-10	1.73981e-08
Car7	120.818	1.41947	0.230248	6.16494	7.05119e-10	1.77296e-08
Adra2c	78.6216	2.28678	0.370998	6.16386	7.09928e-10	1.78188e-08
Moxd1	243.424	1.33589	0.216908	6.15881	7.32941e-10	1.83379e-08
Vstm2b	725.063	-1.46708	0.238211	-6.15875	7.33205e-10	1.83379e-08
Speg	1000.07	1.34482	0.218476	6.15547	7.48549e-10	1.86886e-08
Bach1	285.34	-1.40034	0.227809	-6.14699	7.8968e-10	1.96807e-08
Tmem94	1483.2	0.749937	0.12207	6.14352	8.07147e-10	2.00806e-08
Barhl2	37.2895	-8.56458	1.39507	-6.13919	8.29445e-10	2.05991e-08
Sec24d	314.121	-1.28119	0.208957	-6.13133	8.71475e-10	2.16049e-08
Aldh5a1	1944.42	1.09633	0.178842	6.13015	8.77963e-10	2.17277e-08
Ttyh3	2178.54	0.79608	0.129888	6.12898	8.84451e-10	2.185e-08
Cstb	927.759	-1.00477	0.163952	-6.12845	8.8739e-10	2.18843e-08
Bcan	2395.19	1.47948	0.241552	6.12489	9.07437e-10	2.23397e-08
Clcn4	1921.09	1.94259	0.317307	6.1221	9.23484e-10	2.26952e-08
Prkra	262.458	1.07534	0.175845	6.11525	9.64054e-10	2.36511e-08
Pnck	292.408	1.39776	0.228608	6.11422	9.70294e-10	2.3763e-08
Amotl1	253.869	-1.34431	0.219964	-6.1115	9.86984e-10	2.41299e-08
Ifitm3	530.103	-2.06028	0.33717	-6.11052	9.93096e-10	2.42374e-08
Kcnc4	674.285	1.44331	0.236231	6.10976	9.9779e-10	2.43099e-08
Grik2	621.258	1.15345	0.188877	6.10691	1.0158e-09	2.47062e-08
Ms4a4a	34.6861	-3.19486	0.523335	-6.10482	1.02919e-09	2.49888e-08
Dspp	37.5137	-4.17747	0.684685	-6.10131	1.05203e-09	2.54996e-08
Sh2b2	122.004	-1.66264	0.272563	-6.10004	1.06044e-09	2.56593e-08
Ryr2	4377.56	0.983408	0.161409	6.09264	1.11064e-09	2.68281e-08
Fmnl1	933.535	0.958612	0.157385	6.09088	1.12289e-09	2.70778e-08
Arpc5	1714.36	-0.74833	0.122943	-6.0868	1.1519e-09	2.773e-08
Myo1g	47.8665	-3.11632	0.512393	-6.08191	1.18762e-09	2.85413e-08
Chd7	687.559	-1.24876	0.205385	-6.0801	1.20107e-09	2.88154e-08
Twf1	1686.84	-0.987412	0.162521	-6.07559	1.23531e-09	2.95868e-08
Dusp6	739.602	-1.43563	0.236306	-6.07531	1.2375e-09	2.9589e-08
Nid1	628.946	-1.56228	0.257182	-6.07461	1.24286e-09	2.96669e-08
Rps6ka4	519.726	0.976053	0.160704	6.07359	1.25081e-09	2.98064e-08
Cd68	64.2235	-2.28057	0.375657	-6.07089	1.27205e-09	3.02615e-08
Adamts19	27.8908	4.08784	0.674518	6.06039	1.35794e-09	3.22506e-08
Reg3g	42.2937	-5.57193	0.919469	-6.05994	1.36172e-09	3.22861e-08
Insig1	1879.2	-1.23658	0.204076	-6.05944	1.36596e-09	3.23323e-08
Cep85	627.288	-0.957748	0.158233	-6.05278	1.42372e-09	3.3643e-08
Dram1	57.7297	-2.14252	0.354062	-6.05124	1.43732e-09	3.39078e-08
Jph3	2658.55	1.33182	0.220145	6.04972	1.45097e-09	3.41727e-08
Ccr2	52.2089	-5.01963	0.830336	-6.0453	1.49135e-09	3.50275e-08
Scimp	42.4103	-7.78314	1.28749	-6.0452	1.49222e-09	3.50275e-08
Adam12	485.301	-2.50022	0.413808	-6.04199	1.52228e-09	3.56738e-08
Birc3	88.6187	-3.48293	0.576526	-6.04124	1.52939e-09	3.57811e-08
Lrrc4	945.429	1.54547	0.256114	6.0343	1.59653e-09	3.72902e-08
Ksr2	1312.2	1.19438	0.197952	6.03371	1.60237e-09	3.73649e-08
Oxtr	77.3522	-3.33373	0.552649	-6.03228	1.61666e-09	3.76359e-08
Tcte1	1267.93	1.25539	0.208143	6.03135	1.62598e-09	3.77906e-08
Zdhhc17	2718.88	0.806414	0.133961	6.01977	1.74668e-09	4.05293e-08
Sfpq	2960.63	-0.684535	0.113763	-6.01722	1.77435e-09	4.11038e-08
Mfsd4a	958.9	1.35353	0.225035	6.01474	1.80174e-09	4.16699e-08
Gja1	3855.43	1.18735	0.197483	6.01242	1.82773e-09	4.22019e-08
Kcnh2	318.402	1.35192	0.224927	6.01051	1.84936e-09	4.26317e-08
Wls	951.156	0.861287	0.143321	6.00949	1.86108e-09	4.28321e-08
Kcnc1	1111.17	0.890165	0.148218	6.00577	1.90424e-09	4.37541e-08
Vtn	105.121	1.98615	0.331057	5.99941	1.98036e-09	4.54293e-08
Abcg1	944.242	0.812024	0.135375	5.99832	1.99374e-09	4.5662e-08
Pfkfb4	147.915	-1.41642	0.236214	-5.99636	2.01792e-09	4.6141e-08
Limd2	439.889	1.28384	0.214201	5.99363	2.05208e-09	4.68465e-08
Pspn	217.92	-1.25843	0.210143	-5.98846	2.11838e-09	4.82821e-08
Plaur	150.139	-2.77579	0.464022	-5.98203	2.20372e-09	5.01462e-08
Tafa2	263.078	1.84693	0.308907	5.97893	2.24614e-09	5.10292e-08
Kpna4	4119.73	-1.23502	0.206619	-5.97729	2.26885e-09	5.14625e-08
Cd63	3329.37	-1.42248	0.238028	-5.97613	2.28506e-09	5.17471e-08
Stat5a	199.618	-2.47042	0.413572	-5.97337	2.32401e-09	5.25449e-08
Nol4	930.569	1.4339	0.240462	5.96313	2.47455e-09	5.58592e-08
Ctdp1	467.69	-0.943411	0.158234	-5.96212	2.48991e-09	5.61163e-08
Lmcd1	134.372	-1.65387	0.277543	-5.95898	2.53822e-09	5.7114e-08
Erich5	288.33	-1.61427	0.271047	-5.95569	2.58984e-09	5.81829e-08
Snai1	50.3836	-2.79962	0.470132	-5.95497	2.60121e-09	5.83456e-08
Nrxn1	5025.64	1.25454	0.210711	5.95381	2.61965e-09	5.86661e-08
Pnma8a	675.116	1.30423	0.219343	5.94609	2.74621e-09	6.1403e-08
Ccdc85a	391.962	1.9404	0.326359	5.94561	2.75437e-09	6.14882e-08
Plpp3	1987.2	1.50238	0.252733	5.94456	2.77197e-09	6.17834e-08
Lrfn2	286.154	-1.08993	0.183495	-5.93985	2.85277e-09	6.34843e-08
Kcna2	5931.57	1.22038	0.205492	5.93882	2.87077e-09	6.37843e-08
Herc3	2843.39	1.16914	0.19696	5.93591	2.92213e-09	6.48235e-08
Camk2a	11610	1.76246	0.297001	5.9342	2.95277e-09	6.54006e-08
Unc80	3448.7	0.924068	0.155743	5.93329	2.96926e-09	6.5663e-08
Adgrb1	3832.58	0.918727	0.154916	5.93047	3.02072e-09	6.66966e-08
Dkk3	4145.62	1.5839	0.267169	5.92847	3.05765e-09	6.74067e-08
Ucp2	457.947	-1.00204	0.169043	-5.92772	3.07176e-09	6.76123e-08
Csmd3	385.499	1.47706	0.249273	5.9255	3.11356e-09	6.84258e-08
Dck	1074.48	1.47206	0.248478	5.92429	3.13647e-09	6.88221e-08
Ngf	120.296	-2.57716	0.435041	-5.92394	3.14322e-09	6.88633e-08
Slfn13	260.627	-1.64061	0.277004	-5.92272	3.16669e-09	6.92701e-08
Cyld	1663.54	1.23258	0.208158	5.92135	3.193e-09	6.97377e-08
Rbms1	385.294	-1.31006	0.221286	-5.9202	3.21546e-09	7.01198e-08
Rasgef1a	2772.97	1.09264	0.184572	5.91987	3.22199e-09	7.01539e-08
Ier2	304.615	-1.77223	0.299557	-5.91616	3.29536e-09	7.16412e-08
Grip1	774.85	-1.37609	0.23264	-5.91511	3.31649e-09	7.19898e-08
Irf1	177.822	-1.3787	0.233163	-5.91303	3.35876e-09	7.27954e-08
Fam135b	383.134	1.04975	0.177561	5.91202	3.3793e-09	7.31284e-08
Slc25a24	192.746	-1.56962	0.265567	-5.91044	3.41189e-09	7.37208e-08
Fam163b	282.181	1.54282	0.261326	5.90379	3.55249e-09	7.66416e-08
P2ry2	107.65	-2.50057	0.423601	-5.90312	3.56696e-09	7.68365e-08
C2cd4a	36.138	-5.32574	0.902235	-5.90282	3.57336e-09	7.68572e-08
Usp46	2350.57	0.751889	0.127419	5.90091	3.61509e-09	7.76366e-08
Polr1g	220.224	-1.46947	0.249123	-5.89857	3.6666e-09	7.86233e-08
Il2rb	27.6316	-3.87022	0.656237	-5.8976	3.68832e-09	7.89692e-08
Trim54	98.9974	2.46893	0.418685	5.89686	3.70478e-09	7.92015e-08
Abcb9	376.303	1.07476	0.182296	5.8957	3.73108e-09	7.96432e-08
Sapcd2	47.7631	-3.32679	0.564382	-5.89457	3.75658e-09	8.00667e-08
Cadm3	4738.96	1.30047	0.220701	5.89248	3.80437e-09	8.09632e-08
Fat2	56.8786	-2.51398	0.426689	-5.89182	3.81972e-09	8.10456e-08
Jak2	1748.88	-1.17563	0.199532	-5.89195	3.8167e-09	8.10456e-08
Adgrf2	44.4449	-3.00134	0.509452	-5.89131	3.83144e-09	8.11726e-08
Btbd3	1174.36	1.67707	0.284837	5.88782	3.91328e-09	8.27823e-08
Tpbg	475.715	-1.54993	0.263409	-5.88413	4.00145e-09	8.45208e-08
Utp20	843.028	-0.939091	0.159607	-5.88378	4.00998e-09	8.45746e-08
Npm1	3983.87	-0.924441	0.157304	-5.87678	4.18323e-09	8.80971e-08
Pdgfb	238.847	-1.76662	0.300861	-5.87189	4.30866e-09	9.06038e-08
Ece1	1678.51	-1.40968	0.240221	-5.86828	4.40338e-09	9.24579e-08
Phf24	3071.66	0.973647	0.166055	5.86338	4.53529e-09	9.50863e-08
Il13ra1	658.357	-1.9588	0.334371	-5.85817	4.67991e-09	9.7973e-08
Lzts3	858.59	1.78944	0.305894	5.84986	4.91983e-09	1.02843e-07
Pitpnm1	1863.95	1.09312	0.186874	5.84946	4.93165e-09	1.02938e-07
Adk	600.03	1.04498	0.17871	5.84736	4.99426e-09	1.04091e-07
Gpam	1948.6	1.48451	0.253927	5.8462	5.02923e-09	1.04666e-07
Adcy7	161.376	-1.86762	0.31962	-5.84326	5.1189e-09	1.06353e-07
Deptor	619.015	1.12929	0.193271	5.84305	5.12533e-09	1.06353e-07
Calr	10514.3	-0.625286	0.107057	-5.8407	5.19809e-09	1.0765e-07
Tmem218	217.233	1.36373	0.233494	5.84054	5.20312e-09	1.0765e-07
Ppargc1b	88.7458	1.61829	0.277269	5.83654	5.32968e-09	1.10108e-07
Zmiz1	3680.47	-1.16808	0.200334	-5.83068	5.52034e-09	1.1388e-07
Htr1b	195.32	-1.85107	0.317517	-5.82984	5.54794e-09	1.14283e-07
Cyfip2	20547.1	1.17285	0.201311	5.82606	5.6752e-09	1.16734e-07
Mlip	330.52	1.54637	0.265456	5.82532	5.70022e-09	1.17078e-07
Esyt1	318.252	-1.46528	0.25177	-5.81992	5.88774e-09	1.20754e-07
Slc15a2	738.783	1.43774	0.247701	5.80435	6.46175e-09	1.32335e-07
Pbxip1	962.279	1.3912	0.239752	5.80266	6.52719e-09	1.33482e-07
Wee1	417.194	0.988036	0.170295	5.80191	6.55634e-09	1.33884e-07
Armcx6	149.27	1.62195	0.279594	5.8011	6.58798e-09	1.34336e-07
Gabrb3	966.868	1.10106	0.190002	5.79497	6.83337e-09	1.39139e-07
Fosb	314.22	-1.59443	0.275457	-5.78831	7.10975e-09	1.44558e-07
Dusp4	476.523	-1.81041	0.312787	-5.78801	7.12255e-09	1.4461e-07
Ftl1	5025.62	-0.919118	0.158811	-5.7875	7.14434e-09	1.44844e-07
Clec5a	78.5816	-2.63986	0.45672	-5.78005	7.46804e-09	1.5119e-07
Retsat	748.877	1.01043	0.174869	5.77817	7.55158e-09	1.52663e-07
Epm2a	163.404	1.25323	0.216956	5.77646	7.629e-09	1.53788e-07
Rasl10a	191.687	2.40658	0.416616	5.77648	7.62799e-09	1.53788e-07
Adcy4	116.734	-2.34505	0.406182	-5.7734	7.7687e-09	1.56381e-07
Itpkc	644.536	-1.40021	0.242678	-5.76982	7.9358e-09	1.59518e-07
Akap8l	971.488	0.871777	0.151204	5.76557	8.13801e-09	1.6335e-07
Antxr2	450.556	-1.83966	0.319097	-5.7652	8.15602e-09	1.63479e-07
Camk2g	3006.36	1.34831	0.233901	5.76443	8.19345e-09	1.63765e-07
Ift122	610.295	1.0062	0.174553	5.76446	8.19202e-09	1.63765e-07
Tbck	391.132	0.99163	0.17204	5.76396	8.21627e-09	1.63989e-07
Herc1	5488.77	0.873949	0.151662	5.7625	8.28778e-09	1.64718e-07
Sult1a1	83.5909	2.315	0.401721	5.7627	8.27791e-09	1.64718e-07
Tox3	126.585	1.50774	0.261637	5.7627	8.27786e-09	1.64718e-07
Dnajb11	1093.36	-0.811366	0.140906	-5.75819	8.50217e-09	1.68742e-07
Rerg	72.6501	1.72956	0.300388	5.75775	8.52408e-09	1.68939e-07
Sema3c	1978.33	-1.09697	0.19057	-5.75625	8.60031e-09	1.70211e-07
Mgll	2412.43	1.17146	0.203605	5.7536	8.73637e-09	1.72662e-07
Snx2	1367.91	-0.825687	0.143599	-5.74996	8.92649e-09	1.76173e-07
Garem2	69.3153	2.00526	0.348776	5.7494	8.95602e-09	1.7651e-07
S100a10	1299.17	-1.72814	0.300897	-5.74329	9.28534e-09	1.82745e-07
Cdkn3	53.3032	-2.86631	0.499532	-5.73799	9.58042e-09	1.88291e-07
Eaf1	581.496	-1.06563	0.185957	-5.73053	1.00116e-08	1.96491e-07
Slc22a8	69.9404	2.62385	0.458473	5.72302	1.04648e-08	2.05101e-07
Pprc1	515.463	-0.953701	0.166659	-5.72248	1.0498e-08	2.05466e-07
Asrgl1	1255.15	1.02419	0.179003	5.72161	1.05517e-08	2.06233e-07
Phyhip	4423.5	1.40573	0.245835	5.71818	1.07671e-08	2.09863e-07
Zfr2	281.872	1.36611	0.238904	5.71823	1.07639e-08	2.09863e-07
Dzip1	1491.3	1.07156	0.187458	5.71629	1.08878e-08	2.11922e-07
Tspyl4	4886.92	1.05262	0.184165	5.71565	1.09286e-08	2.12423e-07
Mycbp2	6814.95	0.859889	0.150517	5.71292	1.11054e-08	2.15564e-07
Rcor2	169.592	1.50656	0.264197	5.70243	1.18115e-08	2.28955e-07
Nyap2	278.227	1.40126	0.246021	5.6957	1.22865e-08	2.37835e-07
Matr3	8409.52	0.569689	0.100048	5.69416	1.23978e-08	2.39663e-07
Phka1	338.088	1.35074	0.237296	5.69223	1.2539e-08	2.42061e-07
Caskin1	1287.06	0.897242	0.157793	5.68618	1.29915e-08	2.50128e-07
Rhbdf2	94.6652	-2.0192	0.355107	-5.68617	1.29923e-08	2.50128e-07
Mat2a	5413.61	-0.79719	0.140255	-5.68387	1.31677e-08	2.53161e-07
Fcgr1a	102.242	-2.18486	0.384482	-5.68261	1.32658e-08	2.547e-07
Cacng4	2396.02	-1.70876	0.300724	-5.68214	1.33022e-08	2.55052e-07
Rela	405.074	-0.892842	0.157204	-5.67949	1.35095e-08	2.58676e-07
Sell	42.9386	-4.25521	0.749385	-5.67827	1.36062e-08	2.60034e-07
Tgfb2	2058.92	-1.9572	0.34469	-5.67813	1.36172e-08	2.60034e-07
Osbpl1a	3221.86	1.25844	0.221652	5.67754	1.36643e-08	2.60581e-07
Zfp36	590.265	-2.21084	0.389419	-5.67728	1.36856e-08	2.60635e-07
Clec14a	204.425	-2.14254	0.377419	-5.67682	1.37225e-08	2.60985e-07
Actn1	2996.61	-0.938804	0.165655	-5.66723	1.45126e-08	2.75641e-07
Zmiz2	2236.26	0.634374	0.111942	5.66699	1.45325e-08	2.7565e-07
Gja5	39.8124	-3.14112	0.554935	-5.66033	1.51085e-08	2.8619e-07
Ndel1	1409.89	-0.644901	0.113956	-5.65923	1.5205e-08	2.87249e-07
Rnf144a	108.378	1.31181	0.231798	5.65928	1.52012e-08	2.87249e-07
Pla2g4e	173.2	1.7851	0.315506	5.65789	1.53247e-08	2.89123e-07
Atp1a2	15946.3	1.50211	0.265567	5.65622	1.54743e-08	2.91556e-07
Abr	6838.65	0.755485	0.133589	5.6553	1.55573e-08	2.92731e-07
Erich3	544.593	1.49768	0.264861	5.65458	1.56228e-08	2.93572e-07
Eif4a1	4363.05	-0.906566	0.160331	-5.65433	1.56455e-08	2.93608e-07
Rassf1	324.908	-1.33388	0.236023	-5.65146	1.59092e-08	2.98159e-07
Spsb1	563.322	-1.1795	0.208717	-5.6512	1.59332e-08	2.98214e-07
Alpl	193.899	-1.55942	0.276298	-5.64398	1.66162e-08	3.10586e-07
Frmd6	830.748	1.01476	0.17984	5.6426	1.67502e-08	3.12265e-07
Kcnv1	693.89	1.53421	0.271896	5.64261	1.67487e-08	3.12265e-07
Abhd6	733.145	1.04221	0.184739	5.64154	1.68536e-08	3.1378e-07
Bmpr1b	109.525	1.70387	0.302116	5.63977	1.70276e-08	3.16601e-07
Nfe2l2	599.465	-0.972077	0.172445	-5.63704	1.73003e-08	3.21249e-07
Emp3	149.734	-1.85486	0.329063	-5.63679	1.7325e-08	3.21286e-07
Odc1	1724.26	-1.16301	0.206353	-5.63602	1.74025e-08	3.223e-07
Kcnj11	438.978	1.15839	0.205609	5.63393	1.76147e-08	3.25802e-07
Plxna4	4245.37	-0.694068	0.123226	-5.63248	1.77639e-08	3.28134e-07
B4galt1	133.283	-1.85088	0.328765	-5.6298	1.80417e-08	3.3283e-07
Cntn6	119.518	1.72215	0.306064	5.62674	1.83643e-08	3.38153e-07
Dpp6	1757.05	1.15815	0.205834	5.62661	1.83782e-08	3.38153e-07
Bdkrb2	45.4102	-2.3074	0.410573	-5.61996	1.90998e-08	3.50975e-07
Ankrd13d	482.407	1.34515	0.239412	5.61856	1.92558e-08	3.53381e-07
Emp1	692.151	-2.24068	0.398849	-5.61787	1.93331e-08	3.54341e-07
Kcnt2	238.683	1.70782	0.304055	5.6168	1.94522e-08	3.56062e-07
Cacnb3	1192.44	1.00071	0.178212	5.61529	1.96231e-08	3.5826e-07
Tagln2	1091.38	-1.53985	0.274219	-5.61538	1.96129e-08	3.5826e-07
Mgat5b	387.372	1.52737	0.27202	5.61491	1.96668e-08	3.58595e-07
Gabrb2	1102.13	1.51422	0.269719	5.61407	1.97627e-08	3.59879e-07
Atp13a4	58.3619	2.67452	0.476606	5.61159	2.00474e-08	3.64383e-07
Nectin1	680.61	1.02197	0.182121	5.61147	2.00615e-08	3.64383e-07
Dapk1	1222.21	0.92872	0.165562	5.60951	2.02904e-08	3.67594e-07
Hp1bp3	3143.98	0.686149	0.122318	5.60956	2.02847e-08	3.67594e-07
Il6st	4050.06	-0.936656	0.167042	-5.60732	2.05479e-08	3.71782e-07
Dlk1	55.6065	-2.20092	0.392825	-5.6028	2.10913e-08	3.81127e-07
St3gal1	746.229	-0.989439	0.176622	-5.60202	2.1187e-08	3.82368e-07
Tmem245	591.895	0.79177	0.141382	5.60023	2.14071e-08	3.85846e-07
Etv1	1515.51	1.25532	0.224212	5.59882	2.15822e-08	3.88506e-07
Shc1	519.826	-1.31811	0.235477	-5.59761	2.17324e-08	3.90713e-07
Ppp1r12b	2194.17	0.783263	0.139986	5.5953	2.20236e-08	3.95445e-07
Col7a1	307.208	-2.23261	0.3992	-5.59271	2.23551e-08	4.00888e-07
Elf1	252.166	-1.09534	0.196083	-5.58612	2.32198e-08	4.15866e-07
Rnf112	1893.06	1.40115	0.250875	5.58505	2.33629e-08	4.179e-07
Slc6a13	21.7134	5.0933	0.912019	5.58464	2.34183e-08	4.18361e-07
Fmnl3	373.616	-1.33394	0.239097	-5.57905	2.41839e-08	4.31493e-07
Gabrg2	3310.44	1.11434	0.199912	5.57413	2.48768e-08	4.43296e-07
Samd4b	483.7	-0.745119	0.133721	-5.5722	2.51541e-08	4.47673e-07
Sptlc2	888.992	-0.685481	0.123083	-5.56926	2.55819e-08	4.54714e-07
Adcy9	1611	1.45495	0.261583	5.56209	2.66565e-08	4.72626e-07
Pax1	276.781	-8.10082	1.45643	-5.56209	2.66556e-08	4.72626e-07
Litaf	1036.29	-1.19955	0.215701	-5.56118	2.67962e-08	4.74507e-07
Cst6	93.3182	1.76241	0.317092	5.55805	2.72806e-08	4.82481e-07
Rgs16	508.89	-1.86269	0.335193	-5.55706	2.74357e-08	4.84618e-07
Col11a2	810.335	1.61	0.289907	5.5535	2.8e-08	4.93968e-07
Mmp3	22.8937	-4.64302	0.836365	-5.55143	2.83335e-08	4.99228e-07
Ube2q2	1578.34	-0.91367	0.164652	-5.54911	2.87134e-08	5.05291e-07
Kif19	46.2337	2.68514	0.483991	5.54791	2.89106e-08	5.08129e-07
Hnrnpab	3192.53	-0.98799	0.178189	-5.54462	2.94586e-08	5.17118e-07
Nppa	125.607	-2.23753	0.403592	-5.54404	2.95571e-08	5.1756e-07
Tinf2	324.342	-0.981054	0.176956	-5.54405	2.95551e-08	5.1756e-07
Igsf6	97.4411	-2.25471	0.406973	-5.54019	3.02143e-08	5.28414e-07
Vwa1	513.154	-1.19347	0.215447	-5.53949	3.0335e-08	5.29869e-07
Acp7	30.071	-4.33941	0.783985	-5.53506	3.11118e-08	5.42766e-07
Slc4a10	3014.13	1.17265	0.211909	5.53373	3.13495e-08	5.4624e-07
Mkx	166.302	1.06698	0.192929	5.53042	3.19467e-08	5.55959e-07
Kl	26.8266	-4.38815	0.793899	-5.52734	3.25119e-08	5.65098e-07
Mlc1	2956.65	0.873777	0.158109	5.52642	3.26827e-08	5.6737e-07
Gja4	65.7627	-2.09474	0.379096	-5.52563	3.28305e-08	5.69237e-07
Wdr19	769.746	0.832105	0.150597	5.52537	3.28786e-08	5.69373e-07
Casp3	862.782	-1.66558	0.30157	-5.52303	3.33195e-08	5.76302e-07
Dlgap3	1925.84	1.1526	0.208715	5.52238	3.34446e-08	5.77052e-07
Ppp1r3b	41.1343	-2.71939	0.492421	-5.52249	3.34233e-08	5.77052e-07
Map2k3	250.175	-1.49317	0.270487	-5.52033	3.38371e-08	5.83113e-07
Myadml2	44.1103	2.22469	0.403074	5.51932	3.40309e-08	5.85737e-07
Ddx21	1829.99	-1.13005	0.204786	-5.51823	3.42438e-08	5.88686e-07
Hspa5	7611.55	-0.817805	0.148233	-5.51702	3.44803e-08	5.92031e-07
Arpc1b	646.469	-1.61651	0.293122	-5.5148	3.49167e-08	5.98796e-07
Ttll12	453.417	-0.920324	0.166918	-5.51363	3.51512e-08	6.02087e-07
Erbb4	344.35	1.25936	0.228591	5.50923	3.60402e-08	6.16566e-07
Calhm2	95.0577	1.54697	0.280852	5.50813	3.62671e-08	6.19698e-07
Fads1	1843.71	0.877856	0.159427	5.50634	3.66376e-08	6.24518e-07
Lancl1	1133.9	0.917952	0.166705	5.50644	3.66163e-08	6.24518e-07
Alyref	500.955	-1.11994	0.203488	-5.5037	3.71902e-08	6.33168e-07
Fxyd5	305.58	-1.44883	0.263261	-5.5034	3.72545e-08	6.33168e-07
Sall1	473.414	1.04511	0.189908	5.50328	3.72794e-08	6.33168e-07
Dnaja4	1208.05	1.19861	0.217821	5.50271	3.74006e-08	6.33876e-07
Wasf1	2458	1.03343	0.187806	5.50266	3.74108e-08	6.33876e-07
Fn1	2311.59	-1.72388	0.313341	-5.5016	3.76362e-08	6.36932e-07
Polr1e	194.91	-1.22792	0.223226	-5.5008	3.78062e-08	6.39042e-07
Arhgef19	149.688	1.83132	0.332957	5.50016	3.79439e-08	6.40604e-07
Pappa2	307.241	-2.10257	0.382602	-5.49546	3.89694e-08	6.57131e-07
Tnnc2	164.757	2.32643	0.423639	5.49155	3.98421e-08	6.71047e-07
Scn8a	2872.99	1.29883	0.236607	5.48942	4.03255e-08	6.7838e-07
Slc5a1	25.6811	-4.53825	0.827118	-5.48682	4.09238e-08	6.87627e-07
Dcstamp	21.2125	-4.86599	0.887017	-5.48579	4.11616e-08	6.90801e-07
Plin4	59.1918	1.89088	0.344732	5.48506	4.13324e-08	6.92845e-07
Htr2a	636.512	1.61505	0.294481	5.48438	4.14925e-08	6.94704e-07
Rhoc	802.974	-1.26367	0.230427	-5.48403	4.15754e-08	6.95269e-07
Gnal	530.08	1.57082	0.286525	5.4823	4.19839e-08	7.01271e-07
Upp1	123.461	-1.99586	0.364258	-5.47925	4.2713e-08	7.12606e-07
Arid5a	215.21	-1.70338	0.311134	-5.47474	4.38166e-08	7.30157e-07
Ssh1	669.387	-0.784301	0.143324	-5.47224	4.44385e-08	7.39647e-07
Atm	534.435	0.729002	0.133449	5.46279	4.68701e-08	7.79202e-07
Stxbp5l	1718.38	1.13105	0.207158	5.45985	4.76544e-08	7.9038e-07
Unc119	140.909	1.13138	0.207218	5.45985	4.76535e-08	7.9038e-07
Asah2	329.646	2.20174	0.403407	5.45786	4.81895e-08	7.97384e-07
Lrrc25	55.9523	-2.24664	0.41162	-5.45804	4.8142e-08	7.97384e-07
Fam13a	127.601	1.63195	0.299065	5.45685	4.84644e-08	8.00995e-07
Capg	260.456	-2.02482	0.371225	-5.45441	4.91351e-08	8.1113e-07
Strbp	2145.02	0.657603	0.120682	5.44906	5.06366e-08	8.34942e-07
Clic4	3435.89	-1.24785	0.229112	-5.44646	5.13815e-08	8.46238e-07
Faah	529.082	1.44872	0.266065	5.445	5.18061e-08	8.52238e-07
Aen	355.922	-1.44491	0.265524	-5.44173	5.2765e-08	8.67003e-07
Csf2rb	444.355	-2.47395	0.454652	-5.44142	5.28577e-08	8.67517e-07
Ackr2	62.736	3.13466	0.576174	5.44047	5.31402e-08	8.71142e-07
Uso1	2614.13	-0.55737	0.102494	-5.43807	5.38618e-08	8.81949e-07
Kbtbd7	492.93	1.12079	0.20614	5.43705	5.41703e-08	8.85973e-07
Ackr3	214.971	-1.35729	0.249778	-5.43398	5.51097e-08	9.00295e-07
Cnnm1	954.719	0.655077	0.12068	5.42824	5.69132e-08	9.28685e-07
Itpripl2	270.28	-1.62689	0.299995	-5.42306	5.85877e-08	9.54905e-07
Fam13c	787.811	0.822871	0.151778	5.42154	5.90888e-08	9.61964e-07
Crlf3	382.227	0.799078	0.147419	5.42044	5.94516e-08	9.65644e-07
Ddc	26.3155	3.84139	0.708675	5.42053	5.94242e-08	9.65644e-07
Ifit3	83.9306	-2.52219	0.465357	-5.4199	5.96325e-08	9.6747e-07
Kcnk6	46.4406	-2.11717	0.390845	-5.41692	6.06353e-08	9.82509e-07
RGD1564664	291.678	-1.60502	0.296307	-5.41673	6.06985e-08	9.82509e-07
Tead4	29.8795	-2.87754	0.531505	-5.41395	6.16507e-08	9.9678e-07
Dact2	737.058	1.47395	0.272353	5.41192	6.23536e-08	1.00699e-06
Baiap2	1583.02	0.857594	0.15848	5.41137	6.25439e-08	1.00891e-06
Igfbp3	434.956	-1.94875	0.360173	-5.41061	6.28118e-08	1.0117e-06
Ncoa2	1112.88	0.655911	0.12123	5.41047	6.28597e-08	1.0117e-06
Arhgap20	813.816	1.13272	0.209388	5.40969	6.31352e-08	1.01498e-06
Epha2	65.3091	-2.20522	0.407866	-5.40673	6.41872e-08	1.03072e-06
Hmgcs2	46.1688	2.49577	0.461707	5.40552	6.46193e-08	1.03648e-06
Lmo3	789.116	1.66746	0.308556	5.4041	6.51362e-08	1.04358e-06
Fgl2	878.999	-1.89814	0.351289	-5.40335	6.54068e-08	1.04555e-06
Zbbx	23.4483	4.16321	0.770474	5.40344	6.53756e-08	1.04555e-06
Itgb5	464.851	1.03855	0.192321	5.40008	6.66121e-08	1.06361e-06
Iqgap1	933.132	-1.26769	0.235167	-5.3906	7.02228e-08	1.12e-06
Gatad2a	539.49	-1.09249	0.202713	-5.38933	7.07192e-08	1.12664e-06
Ogt	4592.3	0.886438	0.164501	5.38863	7.09961e-08	1.12978e-06
Fn3krp	510.051	0.821551	0.152467	5.38838	7.10949e-08	1.13008e-06
Pou2f2	109.73	1.41232	0.262133	5.38782	7.13186e-08	1.13236e-06
Spry2	1199.81	-0.677664	0.125784	-5.38752	7.14354e-08	1.13294e-06
Cyba	90.1693	-1.63919	0.304292	-5.38691	7.16785e-08	1.13552e-06
Lrrc8d	781.683	-0.770961	0.143172	-5.38484	7.25074e-08	1.14737e-06
Has1	69.4663	-2.8213	0.524157	-5.38254	7.34406e-08	1.16084e-06
Kcnh5	314.811	1.04904	0.194916	5.38201	7.36574e-08	1.16296e-06
Fgfr1	1331.59	-1.03528	0.192437	-5.37983	7.45554e-08	1.17583e-06
RGD1563072	948.846	1.13949	0.21182	5.37954	7.46761e-08	1.17642e-06
Cdyl	479.645	-1.14017	0.211998	-5.37821	7.52282e-08	1.1838e-06
Gpr26	146.181	2.14823	0.399599	5.37596	7.61752e-08	1.19737e-06
Tnfrsf10b	33.2611	-3.15971	0.588112	-5.37263	7.75968e-08	1.21836e-06
Fabp3	400.651	1.25586	0.233805	5.37139	7.8132e-08	1.2254e-06
Syk	222.851	-1.27571	0.237615	-5.3688	7.9263e-08	1.24176e-06
Bend5	230.069	1.15671	0.215604	5.36499	8.09544e-08	1.26685e-06
Clvs2	347.926	1.13729	0.212076	5.36266	8.2005e-08	1.28187e-06
Rgs13	26.7222	4.35803	0.812771	5.36194	8.23326e-08	1.28557e-06
Ephb3	210.312	1.38907	0.259209	5.35889	8.37363e-08	1.30605e-06
Ccl9	27.7092	-4.6165	0.861572	-5.35823	8.40399e-08	1.30934e-06
Tmem196	236.072	1.1545	0.215495	5.35745	8.44031e-08	1.31355e-06
Pnma1	638.115	0.8203	0.153124	5.35711	8.45652e-08	1.31462e-06
Fes	70.416	-1.97571	0.368842	-5.35654	8.4832e-08	1.31732e-06
Kifc3	492.261	0.738792	0.138008	5.35325	8.63897e-08	1.34004e-06
Stk10	212.892	-1.15021	0.21508	-5.34782	8.90191e-08	1.37931e-06
Wnt10a	200.655	-1.54372	0.288859	-5.34418	9.08257e-08	1.40576e-06
Coro2b	2087.91	0.847602	0.158621	5.34355	9.11432e-08	1.40759e-06
Tmed9	1566.37	-0.642558	0.120246	-5.34367	9.10809e-08	1.40759e-06
Zfp36l1	843.745	-0.736696	0.137969	-5.33957	9.31694e-08	1.43731e-06
Lama4	732.029	-1.46709	0.274773	-5.33928	9.33183e-08	1.43804e-06
Sema3g	216.325	-1.46191	0.27383	-5.33875	9.3592e-08	1.44068e-06
Sdc1	1437.76	-4.5588	0.854016	-5.33808	9.39385e-08	1.44445e-06
Il1r1	390.622	-1.97382	0.369914	-5.33589	9.50744e-08	1.46032e-06
Mef2d	1917.71	0.718563	0.134711	5.3341	9.60218e-08	1.47327e-06
PCOLCE2	74.3179	-2.61363	0.490012	-5.33381	9.61755e-08	1.47403e-06
Sntb1	79.9191	1.63188	0.305991	5.33309	9.65571e-08	1.47828e-06
Pnma8c	2344.05	0.976135	0.183047	5.33271	9.67581e-08	1.47975e-06
Hecw1	947.677	1.08683	0.203825	5.33215	9.70544e-08	1.48268e-06
Klhl5	1183.35	0.951443	0.178663	5.32536	1.00755e-07	1.53589e-06
Mxi1	852.98	1.05606	0.198303	5.32547	1.0069e-07	1.53589e-06
Hyal2	251.619	-1.00778	0.189476	-5.31876	1.04476e-07	1.5909e-06
Cbr4	165.765	1.1946	0.224694	5.31657	1.05741e-07	1.60842e-06
Lipe	282.849	-0.982226	0.184804	-5.31496	1.06679e-07	1.62095e-06
Slc39a12	224.521	1.99694	0.375749	5.31457	1.06912e-07	1.62275e-06
Nalcn	1635.17	1.10179	0.207362	5.31337	1.07615e-07	1.63167e-06
Sipa1l1	2570.28	0.949822	0.178799	5.31223	1.08291e-07	1.64015e-06
Slc16a7	209.135	1.60595	0.302341	5.31173	1.08589e-07	1.64291e-06
Psmc4	1375.02	-0.676964	0.127473	-5.31066	1.09231e-07	1.65085e-06
Ahnak	1735	-1.15179	0.216929	-5.30953	1.09911e-07	1.65758e-06
Cdh18	589.929	1.51071	0.284519	5.30971	1.09798e-07	1.65758e-06
Insm1	30.8666	2.38332	0.4489	5.30925	1.10079e-07	1.65834e-06
Nfil3	295.936	-1.61232	0.30371	-5.30876	1.10374e-07	1.66102e-06
Myo5b	539.301	1.64586	0.310081	5.30784	1.10933e-07	1.66766e-06
Specc1l	926.594	-0.744968	0.140439	-5.30458	1.12931e-07	1.69588e-06
Pde2a	4245.56	1.03525	0.195277	5.30144	1.14896e-07	1.72356e-06
Mcrip1	778.832	-0.763596	0.144152	-5.29714	1.17628e-07	1.76268e-06
Ppp1r9a	1533.46	1.18354	0.223495	5.29558	1.18639e-07	1.77593e-06
Cdk5r1	2651.31	0.866856	0.16372	5.29476	1.19175e-07	1.78208e-06
Tead1	165.65	-1.43387	0.270823	-5.29447	1.19361e-07	1.78297e-06
Fam81a	1369.42	1.07127	0.202387	5.29316	1.20221e-07	1.79302e-06
Rufy2	1407.7	0.819659	0.154855	5.29306	1.20287e-07	1.79302e-06
Mast3	1642.94	1.18561	0.224114	5.29021	1.22175e-07	1.81902e-06
Psrc1	55.0047	2.14979	0.406384	5.29004	1.22289e-07	1.81902e-06
Atp8b1	46.25	-3.49063	0.659968	-5.2891	1.22922e-07	1.82652e-06
Acvrl1	250.146	-1.38868	0.262634	-5.28753	1.2398e-07	1.8403e-06
Sik1	231.624	-1.54977	0.293263	-5.28457	1.25997e-07	1.86827e-06
Pcdh15	487.937	-1.01386	0.191915	-5.28284	1.27196e-07	1.88407e-06
Ehd3	1954.28	-0.865009	0.163803	-5.28078	1.28632e-07	1.90335e-06
Ptrh1	304.431	-1.79279	0.339532	-5.28019	1.29051e-07	1.90756e-06
Gabra4	684.846	1.35732	0.25732	5.27483	1.32878e-07	1.96122e-06
Nxph1	547.67	0.881	0.167023	5.27472	1.32959e-07	1.96122e-06
Cst3	9521.8	1.19672	0.226891	5.27443	1.33169e-07	1.96227e-06
Ifitm1	72.1732	-2.31904	0.439877	-5.27202	1.34929e-07	1.98613e-06
Luc7l3	2898.7	0.705304	0.133809	5.27097	1.35702e-07	1.99542e-06
Zdhhc2	1113.97	0.741925	0.140776	5.27025	1.36237e-07	2.0012e-06
Nopchap1	167.385	-1.46691	0.27836	-5.26983	1.36549e-07	2.00372e-06
Adprhl1	101.849	1.90124	0.360839	5.26894	1.37214e-07	2.01138e-06
Scyl3	332.929	-0.967906	0.183776	-5.26678	1.38839e-07	2.03309e-06
Kcnj2	283.292	0.925376	0.175763	5.2649	1.40266e-07	2.05186e-06
Grin2a	1259	1.27133	0.241486	5.26463	1.40474e-07	2.05278e-06
Pgr	191.528	1.19685	0.227483	5.26128	1.43053e-07	2.08831e-06
Emilin2	112.98	-2.29232	0.435906	-5.25876	1.45032e-07	2.11501e-06
Ptbp1	1111.23	-1.29692	0.246727	-5.25648	1.46836e-07	2.13912e-06
Ppm1h	971.091	-0.898291	0.170906	-5.25605	1.47179e-07	2.1419e-06
Adgrb3	1545.29	1.11838	0.212797	5.2556	1.47539e-07	2.14494e-06
Wnt2	185.398	-1.46039	0.277895	-5.25519	1.47869e-07	2.14532e-06
Zfp189	582.38	-1.32413	0.251958	-5.25536	1.47732e-07	2.14532e-06
Ago2	432.713	-1.11921	0.213094	-5.25218	1.50308e-07	2.17847e-06
Tmc5	24.3605	3.86261	0.736404	5.24523	1.56084e-07	2.25986e-06
Rorb	262.104	1.01979	0.194434	5.24492	1.56347e-07	2.26136e-06
Ncor1	2905.06	0.628837	0.119985	5.24099	1.59721e-07	2.30778e-06
Dusp5	163.779	-2.20237	0.420849	-5.23315	1.66641e-07	2.40532e-06
Plekha6	1914.87	0.562894	0.107614	5.23068	1.68891e-07	2.43531e-06
Ccl20	31.1451	-7.33517	1.40244	-5.23031	1.6923e-07	2.4377e-06
Prickle2	3347.7	0.957073	0.183017	5.22941	1.70051e-07	2.44703e-06
Mpped1	1860.96	1.1672	0.223228	5.22876	1.70652e-07	2.45319e-06
Esm1	35.7779	-6.04862	1.15697	-5.22796	1.71391e-07	2.46131e-06
Ldhb	3668.29	0.865052	0.165675	5.22137	1.77606e-07	2.54798e-06
Trpc4	234.212	1.24465	0.238397	5.22093	1.78024e-07	2.55137e-06
Chn1	4872.48	1.64552	0.315376	5.21764	1.81214e-07	2.59183e-06
Rims4	778.576	-0.822999	0.15773	-5.21778	1.81081e-07	2.59183e-06
Kcnk10	238.942	-1.71191	0.328154	-5.2168	1.82043e-07	2.60095e-06
Klhl4	137.474	1.69714	0.325333	5.21662	1.82219e-07	2.60095e-06
Fry	2869.65	1.12442	0.215656	5.21395	1.84863e-07	2.63602e-06
Dipk2a	662.702	1.1092	0.212833	5.21157	1.87244e-07	2.66729e-06
Fam234b	2314.47	0.859825	0.165001	5.21102	1.87801e-07	2.67253e-06
Tmcc2	1370.99	1.28741	0.247087	5.21036	1.88478e-07	2.67946e-06
Slc9a4	22.8052	3.92744	0.753943	5.20919	1.89663e-07	2.6936e-06
Cinp	604.419	-0.746464	0.143336	-5.20781	1.91087e-07	2.7111e-06
Itga11	48.333	3.29063	0.63233	5.20398	1.95061e-07	2.76211e-06
Nucb1	4337.93	-0.572118	0.109939	-5.20397	1.95074e-07	2.76211e-06
Ar	28.0779	2.63899	0.507254	5.20251	1.96619e-07	2.7812e-06
Arhgef25	636.964	1.18294	0.227418	5.2016	1.97585e-07	2.79207e-06
Prr13	648.356	-0.849013	0.163248	-5.20076	1.9848e-07	2.80191e-06
Gsta4	167.53	1.20942	0.232627	5.19896	2.00405e-07	2.82627e-06
Fpgs	194.381	-1.40047	0.269396	-5.19856	2.00836e-07	2.82953e-06
Rxfp1	220.262	1.61653	0.310982	5.19816	2.01275e-07	2.83288e-06
Dscam	508.384	1.22978	0.236603	5.19763	2.0185e-07	2.83816e-06
Cxadr	266.595	1.16558	0.224276	5.1971	2.02426e-07	2.84342e-06
Ezh2	140.25	-1.30383	0.250971	-5.19516	2.04546e-07	2.87035e-06
Pde1b	1194.94	1.02267	0.19693	5.19308	2.06848e-07	2.89977e-06
Gpm6a	15091.7	1.28298	0.247109	5.19197	2.08084e-07	2.91199e-06
Septin8	3309.65	1.15987	0.223398	5.19192	2.08132e-07	2.91199e-06
Cd151	1037.79	-0.919995	0.177226	-5.19107	2.09087e-07	2.92246e-06
Ddit4	566.876	1.41146	0.272177	5.18583	2.15053e-07	3.00288e-06
Peli2	121.029	1.65407	0.319	5.18516	2.15826e-07	3.0107e-06
Esrrg	207.991	1.48835	0.287079	5.18447	2.16632e-07	3.01896e-06
Cbln1	1013.68	-3.26974	0.631176	-5.18039	2.21422e-07	3.08268e-06
rnf141	1476.44	0.894218	0.1727	5.17788	2.24427e-07	3.12143e-06
Vwa5b2	469.163	1.372	0.264992	5.17751	2.24869e-07	3.12451e-06
Trem1	36.0633	-3.90125	0.753639	-5.17655	2.26028e-07	3.13752e-06
Stard8	296.71	1.43792	0.277968	5.17299	2.30381e-07	3.19481e-06
Crispld1	43.0037	2.10732	0.407557	5.17061	2.33326e-07	3.23248e-06
Frmd8	389.546	-0.971848	0.188006	-5.16924	2.35051e-07	3.25319e-06
Il1a	24.8135	-3.27096	0.632888	-5.16831	2.36219e-07	3.26616e-06
Pabpc1	3641.45	-0.933792	0.180768	-5.1657	2.39546e-07	3.30638e-06
Robo2	1957.53	1.16639	0.225799	5.16563	2.39631e-07	3.30638e-06
Wdr37	1430.2	0.713781	0.138183	5.16547	2.3983e-07	3.30638e-06
Nsg2	7301.15	1.19129	0.230661	5.16469	2.40836e-07	3.31701e-06
Podxl	1155.29	-1.1087	0.21472	-5.16349	2.42387e-07	3.33513e-06
Lox	71.6961	-3.73134	0.722946	-5.1613	2.45244e-07	3.37115e-06
Rgs10	236.147	0.902574	0.174895	5.16066	2.46079e-07	3.37934e-06
Alb	52.0288	2.48125	0.480836	5.16029	2.46562e-07	3.38269e-06
Cyp11b1	682.508	1.22897	0.238181	5.1598	2.47214e-07	3.38507e-06
Zbtb18	3747.69	1.03002	0.199619	5.15995	2.47015e-07	3.38507e-06
Cd14	708.247	-4.50619	0.8738	-5.157	2.50935e-07	3.43268e-06
Nudt12	211.74	1.03685	0.201076	5.15651	2.51589e-07	3.4383e-06
Hydin	30.0411	2.5132	0.487505	5.15522	2.53329e-07	3.45584e-06
Pip5k1c	4324.54	0.725487	0.140729	5.1552	2.53362e-07	3.45584e-06
Slc11a1	78.2979	-1.54134	0.299093	-5.15339	2.55821e-07	3.48603e-06
Clasp2	5424.41	1.03288	0.200457	5.15262	2.5687e-07	3.49695e-06
Gadd45a	632.287	-1.9366	0.375878	-5.15221	2.57435e-07	3.50127e-06
Prrt2	2246.55	1.28147	0.248734	5.15198	2.57757e-07	3.50227e-06
Serpinb1a	79.441	-1.89015	0.366895	-5.15175	2.58065e-07	3.50309e-06
Myh9	4085.55	-1.30568	0.253498	-5.15067	2.59559e-07	3.51998e-06
Dbn1	1822.82	0.783641	0.152202	5.1487	2.623e-07	3.55375e-06
Misp3	40.9315	-2.91686	0.566667	-5.1474	2.64128e-07	3.57509e-06
Fabp4	25.7673	-4.50615	0.87591	-5.14453	2.68192e-07	3.62342e-06
S100a8	40.0138	-4.25009	0.82614	-5.14452	2.68212e-07	3.62342e-06
Fbxl16	3619.27	0.964904	0.187578	5.14402	2.68922e-07	3.62954e-06
Vcam1	533.104	1.20832	0.234956	5.14276	2.70734e-07	3.65051e-06
Slc16a3	83.2824	-2.50449	0.48706	-5.14205	2.71758e-07	3.66083e-06
Celsr2	3493.54	1.17443	0.228461	5.14059	2.7387e-07	3.68577e-06
Camk2n1	4332.19	1.0495	0.204294	5.13722	2.7883e-07	3.74896e-06
Atp10d	201.559	-1.45528	0.283309	-5.13672	2.79577e-07	3.75542e-06
Lmna	1105.56	-1.1054	0.215204	-5.13654	2.7985e-07	3.75551e-06
Dact3	1277.87	0.983998	0.191591	5.13593	2.80751e-07	3.76404e-06
Bicc1	219.716	-1.42336	0.277185	-5.13506	2.82049e-07	3.77785e-06
Actb	24996.5	-0.650617	0.126709	-5.13472	2.82561e-07	3.78112e-06
Tpt1	9019.18	-0.718335	0.139966	-5.13221	2.86364e-07	3.82839e-06
Hs6st3	90.3074	1.65199	0.322033	5.12989	2.89914e-07	3.87219e-06
Prkar2a	474.393	-0.780493	0.152181	-5.1287	2.91749e-07	3.89301e-06
Atp8b4	22.1549	-5.95335	1.16086	-5.12838	2.92248e-07	3.89599e-06
Mcemp1	24.3093	-5.48067	1.06899	-5.12697	2.9445e-07	3.92165e-06
RGD1306271	2057.35	0.804384	0.156904	5.12661	2.95004e-07	3.92533e-06
Anp32a	2582.85	0.566758	0.110563	5.12611	2.95788e-07	3.93205e-06
Elp3	1839.15	0.85735	0.167304	5.12451	2.98313e-07	3.9619e-06
Pabpc4	1328.15	-1.10999	0.216663	-5.12313	3.00499e-07	3.98718e-06
Lrrn2	822.377	1.05492	0.206036	5.12009	3.05384e-07	4.0482e-06
Fcer1g	536.753	-1.14129	0.223079	-5.1161	3.11919e-07	4.13095e-06
Arf6	1908.06	-0.72457	0.141744	-5.11183	3.19059e-07	4.22156e-06
Ntrk3	486.251	1.07872	0.211182	5.10801	3.25573e-07	4.30371e-06
Dmp1	18.4981	-4.63695	0.90782	-5.10779	3.25944e-07	4.3046e-06
Nkain4	195.416	1.70782	0.334423	5.10678	3.27693e-07	4.32365e-06
Eef1e1	741.326	-0.649845	0.127306	-5.10458	3.31528e-07	4.36642e-06
Klhdc8b	154.195	1.39235	0.272766	5.10457	3.31552e-07	4.36642e-06
Nexmif	1057.64	0.81953	0.160666	5.10082	3.38189e-07	4.44967e-06
Sgsm3	987.716	-0.630117	0.123603	-5.09791	3.4343e-07	4.51442e-06
Plscr2	76.3891	-1.91411	0.375572	-5.09652	3.45948e-07	4.5433e-06
Cyb561	811.902	-0.73851	0.144968	-5.09431	3.50014e-07	4.58817e-06
Galnt13	459.249	1.4104	0.276852	5.09442	3.49807e-07	4.58817e-06
Col6a3	657.37	-2.00714	0.394078	-5.09324	3.51996e-07	4.60988e-06
Uck2	402.929	-0.93922	0.18442	-5.09282	3.52779e-07	4.61586e-06
Lexm	31.5405	-2.68576	0.527392	-5.09253	3.53324e-07	4.61871e-06
Zmym3	1609.29	0.938687	0.184397	5.09057	3.56992e-07	4.66234e-06
Olfm1	7538.73	1.04634	0.20563	5.08846	3.60992e-07	4.71023e-06
Pkd2	1107.06	-1.05978	0.208361	-5.08628	3.65161e-07	4.76023e-06
Mob3a	199.295	-1.31281	0.258438	-5.0798	3.77825e-07	4.92078e-06
Eri1	567.63	-0.890374	0.175302	-5.07908	3.79258e-07	4.93257e-06
RGD1307182	26.5585	-3.17557	0.625236	-5.079	3.79429e-07	4.93257e-06
Arhgef26	250.362	1.48975	0.293476	5.07621	3.85032e-07	4.99283e-06
Gsta1	842.21	1.39787	0.275388	5.07599	3.85477e-07	4.99283e-06
Lgi1	1208.6	1.33591	0.263169	5.07623	3.84988e-07	4.99283e-06
Uba5	1507	-0.725597	0.142946	-5.07604	3.85389e-07	4.99283e-06
Car2	1693.32	1.70515	0.336229	5.07139	3.94929e-07	5.11057e-06
Dok4	151.241	1.31793	0.260011	5.06876	4.00405e-07	5.1726e-06
Unc45b	19.7298	3.72096	0.734099	5.06874	4.00455e-07	5.1726e-06
Tafa1	1164.51	-2.05904	0.406412	-5.06639	4.05437e-07	5.23217e-06
Rasa3	1086.73	0.790453	0.156036	5.06584	4.06602e-07	5.24242e-06
Ptpn12	1070.03	-0.949387	0.18759	-5.06096	4.17151e-07	5.37352e-06
Arg1	107.617	-1.29486	0.256006	-5.05793	4.23822e-07	5.45449e-06
Arhgef15	205.813	-2.26472	0.447923	-5.05604	4.28052e-07	5.50392e-06
Entpd6	640.342	0.836747	0.165583	5.05332	4.34185e-07	5.57648e-06
Ptger3	106.446	-2.72754	0.539766	-5.05319	4.34485e-07	5.57648e-06
Plk5	56.4816	3.08749	0.611366	5.05014	4.41489e-07	5.66123e-06
Psd	2719.82	1.05768	0.209565	5.04702	4.4876e-07	5.74926e-06
Pcyt1a	1243.18	-0.606471	0.120178	-5.04643	4.50133e-07	5.76162e-06
Kcnq5	990.582	1.22963	0.243976	5.03995	4.65664e-07	5.95502e-06
Fzd3	576.017	0.845402	0.167821	5.03751	4.71619e-07	6.02572e-06
Mak16	618.883	-0.884333	0.175694	-5.03338	4.81911e-07	6.15165e-06
Nfkbiz	235.242	-1.46327	0.290769	-5.03242	4.84332e-07	6.17193e-06
Ostc	545.342	-0.730217	0.145103	-5.0324	4.84372e-07	6.17193e-06
Zkscan8	716.076	0.798167	0.158631	5.03159	4.8644e-07	6.19268e-06
Cnih2	879.228	1.23229	0.244928	5.03125	4.87293e-07	6.1958e-06
Mtarc1	443.276	0.811663	0.161328	5.03114	4.87561e-07	6.1958e-06
Agt	466.776	2.01555	0.400639	5.03084	4.88345e-07	6.20018e-06
Celf5	3803.25	0.871147	0.17318	5.03031	4.89693e-07	6.21171e-06
Otulinl	248.658	-1.46035	0.290517	-5.02673	4.98905e-07	6.3229e-06
Pate4	17.9566	-4.6198	0.919383	-5.02489	5.03727e-07	6.37829e-06
Ppp4r1	733.952	-1.23397	0.245621	-5.0239	5.06339e-07	6.40562e-06
Ndrg2	8656.53	0.907278	0.180605	5.02354	5.07275e-07	6.41172e-06
Ptbp3	717.881	-0.848071	0.168832	-5.02316	5.08278e-07	6.41329e-06
Strn4	2134.4	0.630087	0.125437	5.02315	5.08307e-07	6.41329e-06
S100a9	125.08	-5.30473	1.05614	-5.02276	5.09339e-07	6.42058e-06
Il17rd	85.0578	1.51755	0.302337	5.01939	5.18366e-07	6.52855e-06
Cyp1b1	1257.77	-4.01869	0.800756	-5.01862	5.2044e-07	6.54883e-06
Cygb	324.241	1.00047	0.199638	5.01142	5.40289e-07	6.79006e-06
Rit2	1420.66	0.831088	0.165842	5.01132	5.40572e-07	6.79006e-06
Ttpa	98.7003	2.19655	0.438336	5.0111	5.41207e-07	6.79201e-06
Zfhx4	480.718	1.45147	0.289706	5.01013	5.43925e-07	6.82005e-06
Cldn4	19.8675	-5.17037	1.03263	-5.00701	5.52814e-07	6.92537e-06
Acsbg1	2307.08	1.01803	0.20335	5.00631	5.54835e-07	6.94452e-06
Srpk3	17.4361	5.20049	1.03883	5.00611	5.55397e-07	6.94542e-06
Adra1d	380.092	1.15495	0.230741	5.00541	5.57423e-07	6.96458e-06
Pum3	645.518	-0.992419	0.198293	-5.00481	5.59169e-07	6.98023e-06
Folh1	201.588	1.58016	0.315806	5.00358	5.62746e-07	7.01833e-06
Heyl	212.565	1.53808	0.307405	5.00342	5.63215e-07	7.01833e-06
Dnal1	1430.63	0.680149	0.135944	5.00314	5.64043e-07	7.02246e-06
Prr15	36.1898	-2.74254	0.548325	-5.00168	5.68328e-07	7.06958e-06
Plin2	1307.01	-2.97274	0.594375	-5.00146	5.68973e-07	7.07138e-06
Elovl2	966.101	1.47167	0.294422	4.99852	5.77714e-07	7.1737e-06
C5ar2	122.001	-1.45698	0.291541	-4.99751	5.80756e-07	7.20515e-06
Frmpd1	569.512	-1.58112	0.316524	-4.99525	5.87589e-07	7.28353e-06
Acta2	181.132	-1.73817	0.348132	-4.99286	5.94925e-07	7.36799e-06
S100b	8719.34	0.880974	0.17654	4.99021	6.03135e-07	7.46314e-06
Xdh	212.15	-1.42651	0.285997	-4.98786	6.10532e-07	7.54806e-06
Asic1	629.458	0.98687	0.197888	4.98702	6.13172e-07	7.57406e-06
Slc31a2	134.648	-1.22991	0.246678	-4.98587	6.16822e-07	7.6125e-06
Igsf9b	1198.58	-1.14356	0.229436	-4.98425	6.22031e-07	7.67009e-06
Slc25a28	495.843	-0.708945	0.142286	-4.98253	6.27586e-07	7.73184e-06
Bop1	681.26	-0.778013	0.156191	-4.98118	6.31982e-07	7.77922e-06
Pthlh	60.4001	-2.29969	0.461926	-4.97849	6.40827e-07	7.87437e-06
Ugdh	526.814	-0.886742	0.178112	-4.97857	6.40568e-07	7.87437e-06
Prr12	689.578	0.774458	0.155614	4.9768	6.46435e-07	7.92949e-06
Rnh1	1145.15	-1.2787	0.256929	-4.97687	6.46217e-07	7.92949e-06
Adamts7	72.2822	-2.28737	0.459648	-4.97634	6.4798e-07	7.94154e-06
Bcl6b	63.4216	-1.73238	0.348401	-4.97238	6.61345e-07	8.07772e-06
Ncf2	87.6515	-1.86403	0.374854	-4.97267	6.6037e-07	8.07772e-06
Sars1	3415.19	-0.702914	0.141363	-4.9724	6.61283e-07	8.07772e-06
Syngap1	5313.98	0.995509	0.200208	4.97237	6.61377e-07	8.07772e-06
Smim3	287.808	-1.24301	0.250018	-4.97168	6.63759e-07	8.09981e-06
Ddit3	319.021	-1.2882	0.259156	-4.97076	6.66904e-07	8.13116e-06
Bysl	424.115	-0.914256	0.184019	-4.96828	6.75509e-07	8.22898e-06
Acat2	1069.88	-1.25593	0.252811	-4.96788	6.76901e-07	8.23884e-06
Hmcn2	310.689	-1.31841	0.265398	-4.96769	6.77566e-07	8.23983e-06
Tmod3	865.996	-1.05836	0.213077	-4.96703	6.79875e-07	8.26081e-06
Gpt	109.108	1.9399	0.391081	4.96036	7.03616e-07	8.53803e-06
Oxct1	2719.38	1.21117	0.244174	4.96028	7.03899e-07	8.53803e-06
Syn1	6406.98	0.931118	0.187781	4.95853	7.10295e-07	8.60822e-06
Egfl7	223.073	-1.43669	0.289787	-4.95774	7.13163e-07	8.63357e-06
Kremen1	113.863	-1.68374	0.339626	-4.95762	7.13609e-07	8.63357e-06
Ciart	108.258	1.5693	0.316586	4.95694	7.16105e-07	8.65636e-06
Amz2	1643.92	0.770658	0.155604	4.95268	7.31982e-07	8.84071e-06
Ccdc86	258.646	-1.08943	0.220051	-4.95081	7.39054e-07	8.9185e-06
Gsta6	105.266	1.85708	0.375318	4.94803	7.49693e-07	9.03917e-06
Tspo	190.272	-1.67734	0.339115	-4.94622	7.56692e-07	9.11578e-06
Arfgef3	1985.09	0.993489	0.200894	4.94533	7.60156e-07	9.14971e-06
Timp4	82.2571	1.81817	0.367745	4.94409	7.65001e-07	9.20019e-06
Col12a1	525.724	-1.08888	0.220249	-4.94385	7.6596e-07	9.2039e-06
Fads6	206.526	1.33195	0.269557	4.94123	7.76302e-07	9.32025e-06
Aimp1	701.163	-0.706123	0.142912	-4.94096	7.77402e-07	9.32552e-06
Cd302	205.611	1.02795	0.208126	4.93909	7.84868e-07	9.4071e-06
Vasp	391.42	-1.14983	0.232872	-4.93759	7.90919e-07	9.47159e-06
Clmn	449.567	1.34082	0.2716	4.93675	7.94338e-07	9.50448e-06
Tgfbr3	426.257	-0.778317	0.157665	-4.93653	7.9524e-07	9.50723e-06
Tgfb1i1	352.111	-0.943859	0.191272	-4.93465	8.02964e-07	9.59145e-06
Gpr153	278.24	-1.16558	0.236225	-4.93421	8.0475e-07	9.60227e-06
Plat	1255.85	-1.04373	0.211534	-4.9341	8.05229e-07	9.60227e-06
Col9a2	74.5434	1.6886	0.342279	4.9334	8.08099e-07	9.62837e-06
Fam184b	66.6007	1.73149	0.351008	4.9329	8.10194e-07	9.6452e-06
Bod1	579.611	-0.77427	0.156979	-4.93231	8.12645e-07	9.66624e-06
Myadm	1354.37	-0.933259	0.189314	-4.9297	8.23549e-07	9.7877e-06
Rrp9	318.522	-0.847524	0.17197	-4.92832	8.29376e-07	9.84867e-06
Col15a1	166.202	-1.53205	0.310914	-4.92756	8.32608e-07	9.87874e-06
Mmp14	272.358	-1.78935	0.363253	-4.92589	8.39762e-07	9.93898e-06
Qrsl1	124.418	1.27583	0.259001	4.92596	8.39475e-07	9.93898e-06
Reep2	1441.18	0.719387	0.146042	4.92588	8.39795e-07	9.93898e-06
Ppil1	392.518	-1.117	0.227053	-4.91957	8.67345e-07	1.02564e-05
Cds1	1329.57	0.650083	0.132193	4.91769	8.75693e-07	1.03465e-05
Myh10	7487.17	1.01642	0.206699	4.91737	8.77141e-07	1.03549e-05
Cys1	131	1.71449	0.348701	4.91678	8.79782e-07	1.03775e-05
Palldl1	653.658	-1.08733	0.221167	-4.91633	8.81807e-07	1.03927e-05
Slitrk5	1684.11	-0.845097	0.171913	-4.91583	8.84065e-07	1.04106e-05
Susd4	1324.81	0.985157	0.200443	4.91491	8.8825e-07	1.04512e-05
Synj2	903.99	1.14869	0.233836	4.91237	8.99806e-07	1.05703e-05
Tmem44	228.091	0.83003	0.168968	4.91236	8.99871e-07	1.05703e-05
Kcng1	194.983	1.68858	0.344047	4.90799	9.20136e-07	1.07994e-05
Lrrc23	122.647	1.6588	0.338054	4.90692	9.25176e-07	1.08495e-05
Dapp1	127.6	-1.77608	0.362145	-4.90434	9.37411e-07	1.09657e-05
Nlgn3	1196.48	0.976757	0.19916	4.90437	9.37258e-07	1.09657e-05
Vwc2l	81.9218	1.5278	0.311503	4.90462	9.36099e-07	1.09657e-05
Kat6b	1094.05	0.574291	0.117119	4.9035	9.41438e-07	1.10037e-05
Ptpn2	491.643	-1.08936	0.222234	-4.90187	9.49264e-07	1.1086e-05
Amotl2	369.201	-0.830155	0.169412	-4.90021	9.57334e-07	1.1171e-05
Psat1	1480.82	1.38022	0.281697	4.89967	9.59988e-07	1.11927e-05
Epha3	81.6441	1.78393	0.364176	4.89853	9.65554e-07	1.12483e-05
Adrm1	1000.9	-0.639188	0.13057	-4.89536	9.81271e-07	1.1422e-05
Coq10b	546.117	-0.966531	0.197522	-4.89329	9.91655e-07	1.15239e-05
Itpr3	150.281	-1.36218	0.278376	-4.89332	9.91465e-07	1.15239e-05
Slc1a2	6498.41	1.14795	0.234691	4.89133	1.00155e-06	1.16294e-05
Rhoa	4695.23	-0.547111	0.111891	-4.88969	1.00996e-06	1.17174e-05
Fam241b	351.271	1.16158	0.237595	4.8889	1.014e-06	1.17546e-05
Faim2	2289.04	1.18568	0.242582	4.88775	1.01997e-06	1.18141e-05
Epb41l3	2176.49	0.849822	0.173905	4.88669	1.02544e-06	1.18677e-05
Tmem229a	113.307	1.71537	0.351134	4.88523	1.03308e-06	1.19463e-05
Lilrb3a	46.9988	-2.86049	0.585572	-4.88496	1.0345e-06	1.1953e-05
Aebp1	635.203	-1.1994	0.24601	-4.87542	1.0858e-06	1.25354e-05
Phc2	1037.03	-0.725414	0.148912	-4.87141	1.10806e-06	1.2782e-05
Nup50	1101.48	-0.580576	0.119212	-4.87011	1.11538e-06	1.2856e-05
Mcfd2	907.346	-0.817932	0.168228	-4.86204	1.16182e-06	1.33804e-05
Ntng1	245.405	1.80398	0.371221	4.8596	1.17626e-06	1.35356e-05
Arhgap33	1043.09	0.850202	0.175008	4.85809	1.18525e-06	1.36188e-05
Ing2	329.801	0.93601	0.192672	4.85806	1.18541e-06	1.36188e-05
Zfp597	600.328	1.10206	0.226861	4.85788	1.18652e-06	1.36204e-05
Serpini1	3618.42	1.38744	0.286159	4.84849	1.24404e-06	1.42691e-05
Dlk2	127.033	1.40325	0.289443	4.8481	1.2465e-06	1.42857e-05
Fam120b	1297.82	0.779945	0.160919	4.84682	1.25453e-06	1.43624e-05
Tacc1	4079.47	0.500041	0.103171	4.84672	1.25522e-06	1.43624e-05
Rps6ka5	836.931	0.85448	0.176318	4.84625	1.25819e-06	1.43847e-05
Kctd16	995.434	0.897659	0.185275	4.84502	1.26597e-06	1.4462e-05
Plppr4	5309.44	-0.975501	0.201363	-4.84448	1.26942e-06	1.44897e-05
Ndst4	20.432	4.66503	0.963277	4.84288	1.27973e-06	1.45956e-05
Cd83	520.027	-0.854018	0.176397	-4.84146	1.2889e-06	1.46883e-05
Pes1	964.164	-0.665448	0.137489	-4.84002	1.29826e-06	1.4783e-05
Bean1	164.467	-1.23811	0.255819	-4.83979	1.29976e-06	1.47882e-05
Ctps2	715.982	0.868073	0.179386	4.83914	1.30403e-06	1.48249e-05
Kcnk4	387.504	1.17017	0.241856	4.83828	1.30967e-06	1.48769e-05
Tgfbr2	638.792	-0.899961	0.186028	-4.83776	1.31307e-06	1.49037e-05
Aacs	919.931	-0.696985	0.144166	-4.83461	1.33409e-06	1.51179e-05
Creb3l1	93.807	-1.52793	0.316035	-4.83469	1.33352e-06	1.51179e-05
Idua	336.965	0.786777	0.162766	4.8338	1.33953e-06	1.51674e-05
Sparcl1	23507.5	0.900699	0.186343	4.83355	1.34118e-06	1.5174e-05
Hepacam	698.709	1.44232	0.29858	4.8306	1.36123e-06	1.53884e-05
Dtx3	922.784	0.797683	0.165253	4.82704	1.38578e-06	1.56534e-05
Cgref1	414.142	-0.989064	0.204986	-4.82504	1.39978e-06	1.57989e-05
Cyp7b1	287.187	1.14795	0.23797	4.82392	1.40766e-06	1.58752e-05
Tln1	1467.61	-0.993039	0.205957	-4.82158	1.42423e-06	1.60493e-05
Mt3	1864.61	1.16827	0.242368	4.82023	1.43395e-06	1.61203e-05
Slc2a13	1527.34	1.09319	0.226781	4.82046	1.4323e-06	1.61203e-05
Zcchc24	1397.04	0.961183	0.199402	4.82034	1.43314e-06	1.61203e-05
Tm4sf19	85.1925	-1.54853	0.321303	-4.81952	1.43903e-06	1.61644e-05
Gspt1	2614.44	-0.848444	0.176067	-4.81886	1.4438e-06	1.62052e-05
Hck	122.795	-1.88718	0.39169	-4.81804	1.44973e-06	1.625e-05
Sox2	598.744	0.7456	0.154753	4.81799	1.45009e-06	1.625e-05
Impdh2	574.209	-1.13645	0.235918	-4.81715	1.45621e-06	1.63056e-05
Pik3ap1	209.561	-1.25981	0.261655	-4.81477	1.47366e-06	1.6488e-05
Metrnl	79.9767	-2.16187	0.449052	-4.8143	1.47719e-06	1.65143e-05
Extl1	514.982	0.793412	0.164811	4.81408	1.47882e-06	1.65196e-05
Nid2	107.493	-1.66922	0.346788	-4.81338	1.48398e-06	1.65641e-05
Rcan1	1302.07	-0.671995	0.139653	-4.81188	1.49517e-06	1.66758e-05
Cntn3	409.363	1.10822	0.230383	4.81035	1.50669e-06	1.67778e-05
Flcn	913.57	-0.689309	0.143296	-4.8104	1.50626e-06	1.67778e-05
Ets2	1356.07	-0.885883	0.184226	-4.80867	1.51936e-06	1.69056e-05
Ncl	8065.1	-0.654231	0.136082	-4.80763	1.5273e-06	1.69805e-05
Mafb	184.089	-1.62227	0.337631	-4.80487	1.54855e-06	1.72033e-05
Celf1	3184.35	0.48182	0.100305	4.80353	1.55894e-06	1.72915e-05
Pmp2	44.7253	-2.45564	0.511202	-4.80366	1.55795e-06	1.72915e-05
Lif	386.442	-4.80022	0.999662	-4.80184	1.57211e-06	1.74239e-05
Rab29	227.207	0.902477	0.188001	4.80039	1.58356e-06	1.75371e-05
Syt14	247.586	1.23284	0.256838	4.80006	1.58616e-06	1.75521e-05
Gdf1	715.129	0.896742	0.18689	4.79823	1.60077e-06	1.76999e-05
Gdf11	519.58	0.895556	0.186671	4.7975	1.60655e-06	1.77499e-05
St3gal2	903.744	1.01782	0.21217	4.79719	1.60911e-06	1.77643e-05
Idh2	553.242	0.971382	0.202535	4.79611	1.61776e-06	1.78459e-05
Uaca	405.501	-1.21369	0.253114	-4.79503	1.62653e-06	1.79286e-05
Adora3	16.3316	3.4208	0.713643	4.79343	1.63957e-06	1.80442e-05
Pvr	282.634	-2.31986	0.483955	-4.79353	1.63868e-06	1.80442e-05
Gas7	9334.95	0.942597	0.196694	4.7922	1.64962e-06	1.81407e-05
Mb21d2	457.332	0.944957	0.197215	4.7915	1.65537e-06	1.81757e-05
Nat8l	3010.75	1.11688	0.233093	4.79156	1.65487e-06	1.81757e-05
Dync1i1	1343.54	1.20393	0.251346	4.78991	1.66858e-06	1.83065e-05
Pknox2	634.274	0.888976	0.185621	4.7892	1.67451e-06	1.83573e-05
Chsy1	731.501	-1.38048	0.288299	-4.78837	1.68142e-06	1.84187e-05
Zdhhc18	641.335	-0.983196	0.205342	-4.78809	1.6838e-06	1.84305e-05
Hnrnpf	3222.95	-0.838108	0.175061	-4.78751	1.68863e-06	1.8469e-05
Mcub	56.2543	-2.97619	0.622114	-4.784	1.71844e-06	1.87805e-05
Slc27a1	841.561	1.1473	0.239866	4.78309	1.72624e-06	1.88512e-05
Scrt1	436.339	1.10931	0.231949	4.78257	1.7307e-06	1.88854e-05
Rgs14	301.817	1.24043	0.259424	4.78148	1.74005e-06	1.89728e-05
Galntl6	254.084	1.64475	0.344143	4.77928	1.75928e-06	1.91086e-05
Kctd9	398.991	-0.754607	0.157878	-4.7797	1.75561e-06	1.91086e-05
Nlrp10	19.0454	-5.72073	1.19697	-4.77936	1.75856e-06	1.91086e-05
Ogdhl	806.741	0.697829	0.145995	4.77982	1.75453e-06	1.91086e-05
Srm	588.051	-1.11365	0.233015	-4.77931	1.75895e-06	1.91086e-05
Plk3	165.551	-1.21119	0.253555	-4.77684	1.78074e-06	1.9327e-05
Cyp26a1	30.0763	-2.89419	0.606285	-4.77364	1.80926e-06	1.96213e-05
Irak2	233.129	-0.982861	0.206086	-4.76919	1.84968e-06	2.00443e-05
Hcn2	764.216	1.11074	0.232931	4.76854	1.85564e-06	2.00935e-05
Pias1	1134.61	0.590377	0.123841	4.7672	1.86801e-06	2.0212e-05
Lims1	1297.02	-1.02245	0.214525	-4.76613	1.87795e-06	2.0304e-05
Rara	345.874	-1.54257	0.323676	-4.76578	1.88127e-06	2.03244e-05
Trim44	4523.6	0.529431	0.111132	4.76397	1.89823e-06	2.04919e-05
Lonrf1	434.663	0.842396	0.176835	4.76375	1.90032e-06	2.04988e-05
Hhatl	41.6632	2.43937	0.512174	4.76278	1.90944e-06	2.05815e-05
Glud1	3769.5	0.779182	0.163616	4.76226	1.91434e-06	2.06185e-05
Il6r	565.75	-1.26725	0.266148	-4.76144	1.92217e-06	2.06871e-05
Ifitm10	347.375	-1.01345	0.212908	-4.76005	1.93546e-06	2.08143e-05
Rsrp1	5861.29	0.780605	0.164012	4.75943	1.94139e-06	2.08622e-05
Srpra	1477.17	-0.554496	0.116549	-4.75762	1.95886e-06	2.1034e-05
Ddx10	561.284	-0.7351	0.154524	-4.75719	1.96304e-06	2.10628e-05
Nat8f5	25.4855	3.93167	0.826549	4.75673	1.96749e-06	2.10946e-05
Lrrfip1	1161.08	-1.00022	0.210436	-4.75309	2.00335e-06	2.14628e-05
Atxn7l1	770.941	0.648112	0.136373	4.75251	2.00904e-06	2.15074e-05
Snx9	317.024	-0.913406	0.192244	-4.75128	2.02135e-06	2.16228e-05
Rhbdl1	104.132	1.99124	0.419342	4.74849	2.04936e-06	2.19058e-05
Sord	368.08	0.914644	0.192631	4.74817	2.05269e-06	2.19248e-05
Cyp2d4	190.705	1.33114	0.280554	4.74467	2.08851e-06	2.22906e-05
Ret	301.396	-1.69862	0.358045	-4.74415	2.09382e-06	2.23303e-05
Sspn	179.275	1.64131	0.346128	4.74191	2.1171e-06	2.25617e-05
Hsd11b1	683.06	1.1687	0.246549	4.74023	2.13476e-06	2.27327e-05
Lingo1	2817.37	1.1982	0.25293	4.73728	2.16611e-06	2.30492e-05
Ccn2	506.395	-1.14952	0.24274	-4.73563	2.1838e-06	2.32199e-05
Tmem65	1861.2	0.612303	0.129305	4.73536	2.18671e-06	2.32334e-05
Fhl3	75.3756	-1.95017	0.411923	-4.7343	2.19814e-06	2.33373e-05
Slit3	804.23	-0.812841	0.17176	-4.73244	2.21841e-06	2.35348e-05
Dmkn	78.2409	2.72373	0.57562	4.73182	2.22515e-06	2.35886e-05
Thsd7b	81.2812	2.40303	0.507908	4.73123	2.23169e-06	2.36401e-05
Cxcl6	11.9088	-6.91926	1.4628	-4.73014	2.24366e-06	2.37314e-05
Vsir	322.254	0.775633	0.163976	4.73016	2.24341e-06	2.37314e-05
Rps9	2540.2	-0.574468	0.121481	-4.72888	2.2576e-06	2.3861e-05
Midn	697.55	-1.06652	0.225589	-4.72772	2.27054e-06	2.39798e-05
Tram1	1354.11	-0.628038	0.1329	-4.72565	2.29385e-06	2.42079e-05
Fgfr3	682.788	1.16495	0.246543	4.72512	2.29981e-06	2.42527e-05
Agpat2	36.9711	-2.26461	0.479894	-4.71897	2.37038e-06	2.49783e-05
Sybu	823.864	0.720811	0.152774	4.71815	2.38004e-06	2.50614e-05
Pdzrn3	829.248	1.15276	0.244449	4.71576	2.40806e-06	2.53375e-05
Cdk12	1009.97	-0.690663	0.146485	-4.71491	2.41815e-06	2.54248e-05
Mphosph10	389.231	-0.866297	0.1838	-4.71325	2.43796e-06	2.5614e-05
Serpinh1	1372.79	-1.03456	0.219639	-4.71029	2.4736e-06	2.59692e-05
Slc37a1	250.397	-1.14922	0.244237	-4.70534	2.5344e-06	2.65876e-05
Sgsm1	1823.27	0.705505	0.149944	4.70513	2.537e-06	2.65952e-05
Pxdn	912.513	-1.8124	0.385306	-4.7038	2.55362e-06	2.67496e-05
Csdc2	706.872	0.799102	0.169937	4.70234	2.57195e-06	2.69217e-05
Ly6c	25.9379	-5.57748	1.18664	-4.70025	2.59846e-06	2.7179e-05
Nop16	713.706	-0.622956	0.132563	-4.69931	2.61045e-06	2.72842e-05
Zfp365	5087.97	1.10734	0.235656	4.69896	2.61491e-06	2.73107e-05
Hecw2	991.626	-0.666986	0.141971	-4.69806	2.62646e-06	2.7411e-05
Coq8b	1059.95	-1.06353	0.226519	-4.69511	2.66465e-06	2.77891e-05
Iqca1	24.3474	2.86781	0.610994	4.69368	2.68338e-06	2.79637e-05
Lgr4	554.225	0.893345	0.190374	4.69257	2.69792e-06	2.80739e-05
Uxs1	1074.45	-0.521873	0.111211	-4.69266	2.69676e-06	2.80739e-05
Ppp1r9b	9505.65	0.566823	0.120829	4.6911	2.71735e-06	2.82552e-05
Lrrc4b	1583.05	0.835654	0.178155	4.69061	2.72391e-06	2.83026e-05
Ptp4a1	2885.05	-0.778501	0.166039	-4.68867	2.74989e-06	2.85306e-05
Tlr1	49.5276	-2.408	0.51357	-4.68875	2.74878e-06	2.85306e-05
Ppp3ca	5396.93	0.94191	0.200921	4.68797	2.75932e-06	2.86075e-05
Mettl9	1229.09	-0.68459	0.146131	-4.68476	2.8029e-06	2.9038e-05
Mapk1ip1l	1530.99	-0.736511	0.157241	-4.68398	2.81364e-06	2.91279e-05
Carmil1	569.671	0.960752	0.205178	4.68253	2.83352e-06	2.93122e-05
Cd300le	20.9696	-3.77865	0.807747	-4.67802	2.8966e-06	2.99429e-05
Kcnb1	2619.37	0.561896	0.120155	4.67642	2.91925e-06	3.01549e-05
Nim1k	189.877	1.02836	0.219935	4.67574	2.929e-06	3.02335e-05
Adcy10	23.9331	3.31861	0.71039	4.67152	2.98972e-06	3.08271e-05
Oxnad1	299.044	-0.827215	0.177085	-4.6713	2.99305e-06	3.08271e-05
R3hdm4	1345.51	0.839644	0.179742	4.67137	2.99191e-06	3.08271e-05
Adcy8	334.6	-1.29154	0.276648	-4.66851	3.03387e-06	3.12247e-05
Adgrl4	333.625	-0.974299	0.208793	-4.66633	3.06621e-06	3.15347e-05
Ucn2	16.1144	-4.12773	0.885008	-4.66407	3.10022e-06	3.18613e-05
Ndufs3	943.784	0.605239	0.129788	4.6633	3.11185e-06	3.19575e-05
Fndc3b	432.128	-1.13697	0.243827	-4.66304	3.11577e-06	3.19745e-05
Plekhb2	7616.12	-0.450483	0.0966441	-4.66126	3.14284e-06	3.22289e-05
Rock2	7728.16	-0.481041	0.103227	-4.66003	3.1616e-06	3.23978e-05
Mvp	567.725	-1.55702	0.334332	-4.65711	3.20686e-06	3.28378e-05
Adam8	116.627	-1.29411	0.277917	-4.65648	3.21668e-06	3.29145e-05
Pmepa1	543.935	-1.55538	0.33405	-4.65612	3.22229e-06	3.29242e-05
Tmem252	86.875	-1.86263	0.400038	-4.65614	3.2219e-06	3.29242e-05
Cdk17	2650.86	0.697027	0.149744	4.65479	3.24305e-06	3.31124e-05
Abhd3	1078.33	0.849807	0.182606	4.65378	3.25904e-06	3.32516e-05
Eipr1	870.973	-0.727424	0.156326	-4.65324	3.26762e-06	3.33151e-05
Cacna1g	1580.75	0.691265	0.148587	4.65225	3.28332e-06	3.3451e-05
Pxmp2	41.5883	1.70882	0.367456	4.6504	3.31286e-06	3.37277e-05
Timp1	2397.5	-3.4269	0.737029	-4.64962	3.32552e-06	3.38322e-05
Serinc2	333.447	-0.936454	0.201414	-4.6494	3.32904e-06	3.38436e-05
Abi2	6559.39	0.715654	0.153944	4.64879	3.3388e-06	3.39185e-05
Il1rap	813.956	-0.895898	0.192722	-4.64864	3.34123e-06	3.39187e-05
Wdr91	464.6	-0.730686	0.157195	-4.64827	3.34729e-06	3.39559e-05
Nme3	60.5308	1.9358	0.416516	4.6476	3.35817e-06	3.40174e-05
Slc17a7	13498.5	1.16439	0.250532	4.64768	3.35697e-06	3.40174e-05
Slc22a6	18.0954	3.58469	0.771397	4.64702	3.3677e-06	3.40895e-05
Selenbp1	34.4019	3.03532	0.653467	4.64495	3.40162e-06	3.44082e-05
Prrc2b	7681.16	0.534822	0.115174	4.64361	3.42382e-06	3.4608e-05
Wdr17	293.424	1.24783	0.268737	4.64332	3.42859e-06	3.46315e-05
Jpt2	313.37	-1.05081	0.226445	-4.64045	3.47645e-06	3.50648e-05
Lypd1	320.956	1.50413	0.324129	4.64055	3.47487e-06	3.50648e-05
Zbtb4	2196.54	0.592321	0.127655	4.64001	3.48391e-06	3.51149e-05
Gprc5a	103.764	-5.14216	1.10834	-4.63951	3.4923e-06	3.51744e-05
Rrp1b	274.297	-0.985874	0.212647	-4.63621	3.5486e-06	3.5716e-05
Cers4	799.58	0.627811	0.135432	4.63561	3.55891e-06	3.57943e-05
Grem2	1249.05	-1.32543	0.285991	-4.63453	3.57757e-06	3.59499e-05
Upf1	1010.27	-0.734408	0.158468	-4.63442	3.57947e-06	3.59499e-05
Zfc3h1	1547.1	0.69259	0.149466	4.63378	3.59053e-06	3.60354e-05
Chsy3	192.643	0.923404	0.199304	4.63314	3.60155e-06	3.61203e-05
Btg1	732.101	-0.956155	0.206405	-4.63243	3.61397e-06	3.61679e-05
Map2	18981.5	0.82018	0.177044	4.63264	3.6103e-06	3.61679e-05
Vat1	830.767	-1.00582	0.217123	-4.6325	3.61269e-06	3.61679e-05
Axl	1201.41	-0.771813	0.166695	-4.6301	3.65486e-06	3.65511e-05
Dio3	17.9126	-3.34849	0.724063	-4.62458	3.75361e-06	3.75122e-05
Spock2	8632.52	0.876368	0.189584	4.6226	3.78966e-06	3.78457e-05
Pygb	2238.07	0.870026	0.188291	4.62064	3.82552e-06	3.81769e-05
Tuba4a	4114.14	1.07033	0.231658	4.62032	3.8315e-06	3.82095e-05
Acan	194.059	-1.67315	0.362321	-4.61786	3.87723e-06	3.86384e-05
Mdm2	952.883	-0.972261	0.210651	-4.61552	3.92122e-06	3.90491e-05
Dgkz	3885.7	0.984649	0.213378	4.61458	3.93893e-06	3.91979e-05
Top2a	125.708	-2.22146	0.481418	-4.61441	3.94205e-06	3.92014e-05
Btbd8	1715.57	1.04658	0.226831	4.61391	3.95168e-06	3.92694e-05
Nop14	553.756	-0.821599	0.178108	-4.61292	3.97054e-06	3.94292e-05
Add3	2304.77	0.78288	0.169722	4.61272	3.97433e-06	3.9439e-05
Tecpr2	1132.21	0.784964	0.170219	4.6115	3.99768e-06	3.9643e-05
Ift140	848.016	0.675495	0.146504	4.61075	4.01212e-06	3.97583e-05
Fmn1	160.674	1.00263	0.217551	4.6087	4.05196e-06	4.01249e-05
Chd3	6400.96	0.579552	0.125783	4.60756	4.07421e-06	4.0317e-05
Ttc3	11286.4	0.729935	0.158486	4.60567	4.11146e-06	4.06571e-05
Brsk1	3821.47	0.736938	0.160019	4.6053	4.11869e-06	4.07001e-05
Efnb2	179.262	0.998592	0.216872	4.60452	4.13424e-06	4.08253e-05
Cfh	1102.03	-0.677904	0.147239	-4.6041	4.1425e-06	4.08782e-05
Rusc2	1936.68	0.674219	0.146463	4.60334	4.1576e-06	4.09986e-05
Eef1a1	41454	-0.563753	0.122528	-4.60102	4.20421e-06	4.14294e-05
Ehd2	291.264	-1.33539	0.290367	-4.59897	4.24591e-06	4.18111e-05
Usp16	505.221	-0.764666	0.166404	-4.59524	4.32256e-06	4.25363e-05
Pdcd6ip	2692.31	-0.645177	0.140471	-4.59295	4.37017e-06	4.29749e-05
Map7d1	4536.66	-0.747834	0.162888	-4.5911	4.40924e-06	4.33289e-05
Med15	980.781	-0.610764	0.133094	-4.58896	4.45456e-06	4.37438e-05
Ypel4	655.011	0.916895	0.199826	4.58846	4.46522e-06	4.38181e-05
Kcnip4	209.289	1.24854	0.272121	4.5882	4.47093e-06	4.38437e-05
Notum	23.9577	3.85972	0.841982	4.58409	4.55977e-06	4.46529e-05
Zyg11b	913.469	0.879582	0.191873	4.58419	4.55743e-06	4.46529e-05
Rrbp1	2295.83	-0.75075	0.163834	-4.58237	4.59739e-06	4.49902e-05
Ankub1	31.2944	2.76619	0.603773	4.58151	4.61629e-06	4.51438e-05
Hlx	30.6575	-2.39849	0.523825	-4.57879	4.67667e-06	4.57026e-05
Hmga1	911.634	-0.982266	0.214618	-4.5768	4.72137e-06	4.61076e-05
Etv3	706.74	-0.642451	0.140389	-4.57621	4.73477e-06	4.62065e-05
Morn4	488.464	0.823993	0.180074	4.57587	4.74249e-06	4.62499e-05
Rps2	7327.75	-0.700031	0.153067	-4.57336	4.79962e-06	4.67748e-05
Sema6b	772.125	1.03763	0.226977	4.57152	4.84201e-06	4.71554e-05
Atp8b2	1097.71	0.541227	0.118428	4.57008	4.87533e-06	4.74145e-05
Ntsr2	798.543	1.12961	0.247167	4.57021	4.87241e-06	4.74145e-05
Stim1	911.654	0.777675	0.170182	4.56968	4.88475e-06	4.74734e-05
Rheb	1565.26	-0.54598	0.11949	-4.56926	4.89446e-06	4.75352e-05
Ecel1	160.807	-1.82167	0.398893	-4.56681	4.95202e-06	4.80611e-05
Crtc1	801.243	0.879505	0.192593	4.56664	4.95595e-06	4.80662e-05
Cyp4x1	232.313	1.13079	0.247889	4.56169	5.07424e-06	4.91798e-05
Zfp467	120.224	1.19796	0.262633	4.56135	5.08261e-06	4.92271e-05
Slc25a37	59.3665	-1.48388	0.325407	-4.56007	5.11376e-06	4.94948e-05
Siglec10	20.6442	-3.57403	0.783879	-4.55942	5.12958e-06	4.9614e-05
Ptprd	3474.83	0.869141	0.190644	4.55898	5.14038e-06	4.96845e-05
Ampd2	657.014	0.725707	0.159279	4.55621	5.20845e-06	5.0278e-05
Ctdspl	485.843	0.96853	0.212574	4.55619	5.2089e-06	5.0278e-05
Nfkb1	614.809	-0.884346	0.194234	-4.55301	5.28848e-06	5.10112e-05
Mgst3	751.117	0.971533	0.213398	4.55268	5.29675e-06	5.10562e-05
Arap3	254.524	-0.841298	0.184894	-4.55017	5.36025e-06	5.1633e-05
Polr2a	2461.8	-0.544608	0.119695	-4.54996	5.36549e-06	5.16483e-05
Dlg4	7445.02	0.722984	0.158906	4.54976	5.37066e-06	5.16629e-05
Map3k12	1240.63	0.571283	0.125577	4.54927	5.3832e-06	5.17483e-05
Grin1	4845.12	0.840691	0.184831	4.54844	5.40452e-06	5.18826e-05
Ica1l	299.11	1.17565	0.25847	4.54849	5.40321e-06	5.18826e-05
Ppard	458.313	-0.756858	0.166422	-4.54781	5.4206e-06	5.20017e-05
Dhx15	2517.81	-0.516736	0.113635	-4.54731	5.43349e-06	5.209e-05
Met	417.167	-0.994867	0.218886	-4.54513	5.49013e-06	5.25973e-05
Dusp15	317.679	1.81832	0.400073	4.54497	5.49424e-06	5.26011e-05
B4galt2	406.573	0.735106	0.161788	4.54364	5.52905e-06	5.28984e-05
Osgin2	429.864	-0.803303	0.176847	-4.54235	5.56303e-06	5.31875e-05
Ctsb	8985.13	-0.607789	0.133828	-4.54158	5.5834e-06	5.33462e-05
Tbrg1	505.297	-0.685205	0.150908	-4.54054	5.61093e-06	5.3573e-05
Gsap	79.4373	-2.04403	0.450309	-4.53918	5.64741e-06	5.38849e-05
Adcyap1	526.499	-1.92388	0.424072	-4.53667	5.71491e-06	5.44922e-05
Ccr7	19.0617	-3.8018	0.838529	-4.53389	5.79078e-06	5.51784e-05
Trmt9b	52.1354	1.7942	0.395776	4.53338	5.80474e-06	5.52741e-05
Zfp521	127.697	-1.0659	0.235142	-4.53302	5.81452e-06	5.533e-05
Scn1a	3170.3	1.27494	0.2813	4.53233	5.8337e-06	5.54751e-05
Mall	29.3176	-2.5062	0.553219	-4.53022	5.8923e-06	5.59947e-05
Spag9	6812.99	0.712412	0.157281	4.52955	5.91099e-06	5.61346e-05
Txndc16	674.971	1.08553	0.239706	4.52861	5.93725e-06	5.63461e-05
Usp33	3023.72	0.463471	0.10237	4.52739	5.97168e-06	5.66348e-05
Lrfn5	685.381	1.07447	0.23734	4.52713	5.979e-06	5.66662e-05
Wdr43	774.277	-0.906133	0.20021	-4.52591	6.01367e-06	5.69566e-05
Wdr6	858.439	1.03647	0.229035	4.52539	6.02841e-06	5.70579e-05
Actl6b	490.862	0.921696	0.203718	4.52437	6.05764e-06	5.72962e-05
Elk1	1217.53	0.587843	0.129963	4.52316	6.09229e-06	5.75854e-05
Fstl3	48.7781	-2.06474	0.456538	-4.5226	6.10841e-06	5.76606e-05
Paqr8	3760.17	1.02262	0.226112	4.52264	6.10736e-06	5.76606e-05
H3f3a	6427.61	-0.525554	0.116212	-4.52237	6.11496e-06	5.76839e-05
Fbxw7	1491.35	0.926754	0.204944	4.522	6.12586e-06	5.77222e-05
Stmn1	5655.46	0.968228	0.214117	4.52195	6.12718e-06	5.77222e-05
Tpm3	3054.81	-0.795324	0.175891	-4.5217	6.13459e-06	5.77534e-05
Heatr5a	486.781	-0.686388	0.15182	-4.52107	6.15267e-06	5.7885e-05
Bcl2l13	883.182	-0.692747	0.153245	-4.52052	6.16889e-06	5.79648e-05
Tns1	476.147	-0.618862	0.136901	-4.5205	6.16935e-06	5.79648e-05
Pink1	1851.62	0.968538	0.214282	4.51992	6.18623e-06	5.80848e-05
Dtx1	1399.19	-0.850091	0.188182	-4.51739	6.26076e-06	5.87455e-05
Gsg1l	142.137	1.05967	0.23467	4.51558	6.31436e-06	5.92092e-05
Rgs5	366.465	1.02046	0.226001	4.5153	6.32269e-06	5.9248e-05
Ldha	7860.64	-0.853394	0.189081	-4.51337	6.38063e-06	5.97513e-05
Pdia3	4859.98	-0.483197	0.107098	-4.51173	6.43013e-06	6.01749e-05
Hspa12a	4008.1	0.632695	0.140244	4.51137	6.44092e-06	6.0236e-05
Fblim1	61.5654	-2.06158	0.457145	-4.50969	6.49217e-06	6.06752e-05
Sec14l1	2259.64	0.599608	0.133018	4.50772	6.55268e-06	6.12002e-05
Ska1	38.7587	-3.40091	0.754498	-4.50751	6.55941e-06	6.12226e-05
Cfap69	336.529	0.700409	0.155394	4.5073	6.5658e-06	6.12418e-05
Cacna1i	2231.93	-0.783471	0.173838	-4.50689	6.57842e-06	6.13191e-05
Rexo2	1270.84	-0.596069	0.132286	-4.50591	6.60883e-06	6.15618e-05
Rpl17	2424.41	-0.835621	0.185547	-4.50356	6.68253e-06	6.22074e-05
Mme	42.1775	1.75536	0.389821	4.50298	6.7007e-06	6.23354e-05
Trpc7	106.274	-1.57732	0.350477	-4.50048	6.77988e-06	6.30306e-05
Hnmt	94.2419	1.49577	0.332383	4.50014	6.79092e-06	6.30917e-05
Hap1	1553.09	-1.03712	0.230512	-4.4992	6.82111e-06	6.33306e-05
Islr2	647.153	1.92746	0.428444	4.49875	6.83531e-06	6.34208e-05
Tgif1	170.153	-1.49896	0.333234	-4.49821	6.85275e-06	6.35408e-05
Satb2	1130.63	0.942824	0.209727	4.49549	6.94092e-06	6.43161e-05
Appl2	376.665	0.801426	0.178424	4.49169	7.06608e-06	6.5433e-05
Grb14	205.371	1.19648	0.266386	4.49151	7.07206e-06	6.54455e-05
Ldlrad4	490.962	-0.630321	0.140341	-4.49136	7.07702e-06	6.54485e-05
Tp53	498.872	-0.862978	0.192206	-4.48987	7.12664e-06	6.58643e-05
Arhgap44	2205.24	0.74275	0.165448	4.48932	7.14513e-06	6.59921e-05
Col19a1	1177.94	0.801552	0.178634	4.48713	7.21879e-06	6.66288e-05
Mphosph8	1994.58	-0.473158	0.105469	-4.48622	7.24991e-06	6.68287e-05
Scn2b	3575.53	1.08685	0.242263	4.48625	7.24892e-06	6.68287e-05
Slc44a2	787.199	0.74738	0.166601	4.48605	7.25559e-06	6.68375e-05
Ech1	327.098	0.789627	0.17603	4.48576	7.26539e-06	6.68842e-05
Cx3cl1	3772.27	0.901234	0.200918	4.48559	7.27135e-06	6.68955e-05
Ano6	882.481	-1.43448	0.319882	-4.4844	7.31184e-06	6.72242e-05
C8g	100.313	1.43512	0.320078	4.48367	7.33714e-06	6.7413e-05
Tmbim1	2148.85	-1.33507	0.297837	-4.48254	7.376e-06	6.7726e-05
Syne3	98.7653	-1.10793	0.247181	-4.48226	7.38571e-06	6.77711e-05
Cckbr	144.75	1.3693	0.305512	4.48197	7.39576e-06	6.77756e-05
Phkg1	14.3744	4.47315	0.998032	4.48197	7.39579e-06	6.77756e-05
Asphd2	368.568	0.836965	0.18676	4.48149	7.41226e-06	6.78824e-05
Sdr9c7	43.4686	2.41264	0.53839	4.48121	7.42218e-06	6.79293e-05
Ceacam4	29.0614	-2.83696	0.633198	-4.48037	7.45152e-06	6.81536e-05
Tes	266.492	-1.21816	0.272063	-4.47749	7.5526e-06	6.90335e-05
Scara5	30.4906	-3.01793	0.674091	-4.47704	7.56841e-06	6.91333e-05
Cftr	32.6817	2.37862	0.531433	4.47586	7.61043e-06	6.94722e-05
Gar1	217.269	-1.04362	0.233252	-4.47423	7.66858e-06	6.99579e-05
Ankrd13b	630.042	0.608635	0.136081	4.47259	7.72762e-06	7.0451e-05
Tpm1	3836.28	-0.854803	0.19119	-4.47095	7.78737e-06	7.095e-05
Adgrv1	161.334	1.43291	0.320555	4.47008	7.81887e-06	7.1191e-05
Furin	794.238	-1.03226	0.230957	-4.46948	7.84095e-06	7.13461e-05
Snx7	525.008	-0.595825	0.133373	-4.46736	7.91905e-06	7.20104e-05
Rap1b	2424.51	-0.634103	0.142063	-4.46353	8.06209e-06	7.32639e-05
Aldoc	7267.76	1.17801	0.264	4.46217	8.11323e-06	7.36813e-05
Bahcc1	310.906	0.82543	0.185099	4.45939	8.21923e-06	7.45959e-05
Ccnl1	645.3	-0.747637	0.167763	-4.45651	8.3305e-06	7.55573e-05
Rbm11	116.621	1.34646	0.302384	4.45282	8.47484e-06	7.68172e-05
Ctso	221.303	0.858521	0.192878	4.45111	8.54294e-06	7.73848e-05
Aass	73.9049	1.82394	0.410162	4.44689	8.71235e-06	7.88688e-05
Smurf1	1330.64	-0.576871	0.129732	-4.44665	8.72193e-06	7.8905e-05
Hormad2	14.7082	-5.35483	1.20595	-4.44036	8.98106e-06	8.11454e-05
Spock3	1129.14	1.11989	0.252203	4.44042	8.97839e-06	8.11454e-05
Nrg2	51.8879	1.58117	0.356188	4.43915	9.03154e-06	8.15493e-05
Aox1	68.0759	2.05145	0.462174	4.43869	9.05081e-06	8.16711e-05
Snph	1265.48	0.776713	0.174995	4.43849	9.05916e-06	8.16943e-05
Drc1	102.434	1.34932	0.304142	4.43648	9.14402e-06	8.2407e-05
Nucb2	334.362	-0.768172	0.173196	-4.43528	9.19519e-06	8.28153e-05
Mvd	378.023	-0.925002	0.208569	-4.43499	9.20763e-06	8.28745e-05
Dsg1	15.7365	-5.41908	1.22207	-4.43433	9.23587e-06	8.30758e-05
Plcl2	916.519	0.88807	0.200401	4.43146	9.35966e-06	8.41357e-05
Cebpd	313.919	-1.56317	0.352866	-4.42991	9.42723e-06	8.46892e-05
Medag	723.658	-1.39655	0.315397	-4.42791	9.51507e-06	8.5424e-05
Cry2	1347.95	0.780478	0.17628	4.4275	9.53336e-06	8.55339e-05
Tnfrsf12a	344.555	-3.20741	0.72448	-4.42719	9.54699e-06	8.56019e-05
Fkbp15	710.229	-0.574145	0.129696	-4.42684	9.56238e-06	8.56729e-05
Ripk3	110.227	-2.39465	0.540951	-4.42673	9.56703e-06	8.56729e-05
Triqk	122.149	1.67042	0.377446	4.42557	9.61859e-06	8.608e-05
Fchsd1	113.138	-1.29521	0.292861	-4.42263	9.75078e-06	8.72076e-05
Mmut	740.798	0.913352	0.206524	4.42249	9.75693e-06	8.72076e-05
Fkbpl	382.761	-1.09465	0.247569	-4.4216	9.79746e-06	8.75145e-05
Ginm1	328.636	-0.80785	0.182761	-4.42024	9.85902e-06	8.80087e-05
Scn2a	6186.91	0.902525	0.204248	4.41876	9.92672e-06	8.85571e-05
LRRTM1	350.06	1.00236	0.226896	4.41771	9.97501e-06	8.89318e-05
Gimap5	82.9875	-2.15929	0.488871	-4.4169	1.00128e-05	8.92123e-05
Impa2	43.7343	1.746	0.395428	4.41548	1.00788e-05	8.96873e-05
Kcnab2	2211.97	1.1208	0.253832	4.41551	1.00773e-05	8.96873e-05
Ajm1	1445.15	0.903529	0.20472	4.41348	1.01721e-05	9.04606e-05
Arf4	1790.11	-0.661443	0.149922	-4.4119	1.02466e-05	9.10655e-05
Bpgm	1125.49	0.726197	0.1647	4.40921	1.0375e-05	9.21491e-05
Nkiras1	1988.61	1.25369	0.284363	4.40878	1.03957e-05	9.22745e-05
Sgpp2	127.905	1.75871	0.399072	4.407	1.04812e-05	9.29751e-05
Kcnj16	97.9132	2.1867	0.496272	4.40625	1.05176e-05	9.32395e-05
Mex3b	243.22	0.840505	0.190851	4.40397	1.06285e-05	9.41642e-05
Lratd2	116.623	1.24421	0.282594	4.40281	1.06858e-05	9.46122e-05
Tox	505.513	0.823212	0.186998	4.40226	1.07129e-05	9.47929e-05
Helb	309.597	-0.967647	0.219887	-4.40067	1.07919e-05	9.54322e-05
Cdc42ep4	546.908	1.11282	0.252918	4.39992	1.08289e-05	9.56995e-05
Necab2	273.174	1.06316	0.241672	4.39919	1.08656e-05	9.59146e-05
Tnfrsf11b	673.884	-1.23522	0.280784	-4.39916	1.08668e-05	9.59146e-05
Zer1	1855.03	0.702941	0.1598	4.39888	1.08812e-05	9.59815e-05
Zfp239	743.191	0.97952	0.222687	4.39864	1.08931e-05	9.6026e-05
Gdi2	4942.96	-0.511153	0.116221	-4.39813	1.09189e-05	9.61937e-05
Mok	60.2874	1.4707	0.334408	4.39793	1.09287e-05	9.62146e-05
Nr2f1	800.9	1.09504	0.248996	4.39781	1.09349e-05	9.62146e-05
Tma16	109.846	-1.18277	0.268992	-4.39706	1.09726e-05	9.64867e-05
Cbx6	4185.41	0.694074	0.157879	4.39625	1.10139e-05	9.67296e-05
Coq8a	278.463	1.28632	0.29259	4.39633	1.10094e-05	9.67296e-05
Hspb6	287.602	0.93917	0.213774	4.39329	1.11649e-05	9.79949e-05
Sprr1a	1203	-2.94385	0.670103	-4.39313	1.11732e-05	9.80063e-05
Aldh1l2	106.419	-2.8901	0.657968	-4.39246	1.12077e-05	9.82481e-05
Nfya	303.651	-0.91683	0.208807	-4.3908	1.12933e-05	9.89373e-05
Bsn	3402.22	0.734848	0.167415	4.38939	1.13667e-05	9.95186e-05
Sun1	1047.58	0.609688	0.138939	4.38816	1.14312e-05	0.000100021
Vstm2a	510.076	1.31815	0.300399	4.38798	1.14408e-05	0.000100044
Edn1	94.7631	-2.06815	0.471382	-4.38742	1.14701e-05	0.000100238
Atp13a5	117.141	1.75175	0.399514	4.38471	1.16138e-05	0.000101383
Tmem38a	768.568	1.01577	0.231663	4.38468	1.16155e-05	0.000101383
Btg2	355.792	-1.10975	0.253204	-4.38283	1.17147e-05	0.000102185
Scamp2	402.362	-0.831214	0.189658	-4.38269	1.17222e-05	0.000102188
Eif3d	1051.1	-0.783805	0.17887	-4.38198	1.17604e-05	0.000102458
Gnai3	955.339	-0.615128	0.140382	-4.38183	1.17688e-05	0.000102468
Tmem123	350.402	-1.04081	0.237581	-4.38087	1.18204e-05	0.000102853
Mettl1	124.345	-1.2867	0.293737	-4.38043	1.18443e-05	0.000102998
Kalrn	3726.8	1.00569	0.229676	4.37874	1.19366e-05	0.000103737
Lyzl4	167.198	-1.112	0.254041	-4.37723	1.20195e-05	0.000104277
Paxip1	622.364	-0.785554	0.179465	-4.37721	1.20209e-05	0.000104277
Pik3ip1	471.058	1.19836	0.27377	4.37724	1.20193e-05	0.000104277
Abca8	234.648	1.24031	0.283372	4.37696	1.20348e-05	0.000104333
Abhd14b	133.892	1.14045	0.260756	4.37362	1.22203e-05	0.000105818
Cracr2a	22.4997	2.6365	0.602821	4.37361	1.2221e-05	0.000105818
Arl15	405.578	1.06558	0.243684	4.37278	1.22676e-05	0.000106075
Itm2c	7342.65	0.945242	0.21617	4.37268	1.22732e-05	0.000106075
Mmp8	9.29873	-6.56264	1.50077	-4.37284	1.22642e-05	0.000106075
Adam22	977.638	0.960807	0.219755	4.37218	1.23011e-05	0.000106251
Acsl1	1484.53	-0.731189	0.16729	-4.37079	1.23796e-05	0.000106799
Dnajc27	2258.28	0.63961	0.146333	4.37092	1.23726e-05	0.000106799
Rasgrp2	36.5018	2.0515	0.469684	4.36782	1.2549e-05	0.000108194
Tmem88	41.3505	-2.16377	0.495741	-4.36472	1.27285e-05	0.000109675
Nfix	522.626	0.992237	0.227395	4.36349	1.28006e-05	0.000110162
Plxdc2	351.375	0.871793	0.199792	4.3635	1.28e-05	0.000110162
B3gnt9	180.852	-0.920572	0.211036	-4.36216	1.28783e-05	0.000110762
Gpatch11	416.022	-0.697907	0.159998	-4.36197	1.28898e-05	0.000110794
Itgam	974.519	-1.26665	0.290473	-4.36065	1.29676e-05	0.000111395
Gab2	725.833	-0.726149	0.166578	-4.3592	1.30537e-05	0.000112067
Id1	266.018	-1.08642	0.249323	-4.35747	1.31572e-05	0.000112886
Lypla1	773.505	-0.549752	0.126199	-4.35624	1.32313e-05	0.000113454
Tmem8b	605.699	0.858456	0.19709	4.35567	1.32663e-05	0.000113685
Sh3bgrl	2263.66	0.493531	0.113323	4.35507	1.33024e-05	0.000113925
Cpne7	216.944	1.06788	0.245374	4.35204	1.34877e-05	0.000115442
Cryab	1122.37	-1.33311	0.3064	-4.35089	1.35583e-05	0.000115976
Gclc	1415.8	-0.919706	0.211401	-4.35053	1.3581e-05	0.0001161
Lin7b	199.38	1.42525	0.327619	4.35032	1.35942e-05	0.000116142
Mpp2	1531.15	1.27702	0.293639	4.34894	1.36797e-05	0.000116802
Lrrc59	2039.64	-0.753163	0.173194	-4.34867	1.36964e-05	0.000116874
Col27a1	488.108	0.891869	0.205141	4.34759	1.37639e-05	0.00011738
Nova2	425.704	0.848598	0.195314	4.34478	1.39417e-05	0.000118824
Adra1b	305.899	1.13795	0.261924	4.34457	1.39546e-05	0.000118862
Eif3b	1788.74	-0.662022	0.152392	-4.34422	1.39773e-05	0.000118946
Myo9b	1712.03	-0.693189	0.159568	-4.34416	1.39812e-05	0.000118946
Max	1045.27	-0.811782	0.186878	-4.34392	1.39962e-05	0.000119002
Vwa8	541.56	0.773115	0.178039	4.34239	1.40941e-05	0.000119761
Scaper	482.812	0.716714	0.16509	4.34135	1.41611e-05	0.000120258
Arhgap42	163.586	-1.0363	0.238718	-4.34111	1.41767e-05	0.000120319
Adam9	1112.32	-0.61756	0.142265	-4.34093	1.41882e-05	0.000120344
S1pr2	187.808	-1.26784	0.292215	-4.33874	1.43304e-05	0.000121477
Irak3	167.033	-1.14564	0.26418	-4.3366	1.44704e-05	0.000122591
Acsm5	7.39751	6.4368	1.4845	4.336	1.45102e-05	0.000122633
Plekhg3	933.143	1.2852	0.296392	4.33614	1.45007e-05	0.000122633
Samd1	493.298	-0.982334	0.226551	-4.33604	1.4507e-05	0.000122633
Stt3a	799.62	-0.714552	0.164783	-4.33631	1.44892e-05	0.000122633
Trio	4793.62	-0.664038	0.15317	-4.3353	1.45561e-05	0.000122948
Il31ra	16.4678	-4.93914	1.1399	-4.33295	1.47125e-05	0.000124195
Pdcd4	1173.97	0.796866	0.183945	4.3321	1.47692e-05	0.0001246
Wdr74	277.403	-0.79834	0.184319	-4.33129	1.48239e-05	0.000124986
Traf2	183.285	-0.944703	0.218133	-4.33087	1.48525e-05	0.000125152
Sec61g	637.379	-0.635787	0.14683	-4.33009	1.49052e-05	0.000125521
Zyx	656.619	-0.916351	0.211638	-4.3298	1.49246e-05	0.00012561
Tatdn2	778.968	-0.595358	0.137512	-4.3295	1.49448e-05	0.000125706
Ndrg4	16182.9	0.807907	0.186637	4.32877	1.49947e-05	0.00012605
Cyp46a1	1597.54	0.872406	0.201591	4.32761	1.50739e-05	0.000126641
Ahsa2	531.175	-0.995881	0.230334	-4.32364	1.53476e-05	0.000128863
Dnhd1	353.151	-0.704613	0.16299	-4.32305	1.5389e-05	0.000129134
Clpb	917.591	0.560798	0.12977	4.32148	1.54989e-05	0.00012998
Lrrc56	41.0736	1.64993	0.381827	4.32114	1.55222e-05	0.000130097
Kbtbd3	194.797	0.863958	0.19995	4.32086	1.5542e-05	0.000130186
Crocc	178.067	0.985633	0.228192	4.31932	1.5651e-05	0.000131021
Nfkb2	152.155	-1.62112	0.375456	-4.31774	1.57635e-05	0.000131807
Tagln	391.226	-1.77428	0.410917	-4.31787	1.57545e-05	0.000131807
Irf2bpl	577.195	-0.789279	0.182856	-4.3164	1.58594e-05	0.00013253
Asl	237.927	-0.898262	0.208137	-4.31572	1.59085e-05	0.000132784
Mcee	128.111	1.02197	0.236796	4.31584	1.58997e-05	0.000132784
Ddt	669.819	0.989826	0.2294	4.31485	1.59711e-05	0.000133228
Naa60	1261.19	0.662222	0.153507	4.31395	1.60363e-05	0.000133693
Rabl6	1919.86	0.516488	0.119741	4.31336	1.60789e-05	0.000133969
Fmo5	90.799	-2.13924	0.496115	-4.31198	1.61797e-05	0.000134729
Ftsj3	783.801	-0.966653	0.224195	-4.31167	1.62026e-05	0.000134841
Tspan17	746.721	1.2824	0.297462	4.31114	1.62418e-05	0.000135087
Frrs1	66.8655	-1.65625	0.38429	-4.3099	1.63332e-05	0.000135767
Spry1	131.386	-1.39717	0.324194	-4.30969	1.63483e-05	0.000135813
Hk2	245.707	-1.11707	0.25928	-4.30837	1.64465e-05	0.000136549
Ecm1	129.833	-1.4159	0.328833	-4.30584	1.66352e-05	0.000138034
Galm	151.945	1.06494	0.247404	4.30444	1.6741e-05	0.000138749
Pdcl3	512.581	-0.88583	0.205791	-4.30452	1.67348e-05	0.000138749
Slc10a5	1341.2	0.773364	0.17971	4.30341	1.68192e-05	0.000139312
Trdn	25.7376	4.50533	1.04695	4.30328	1.68287e-05	0.000139312
Hpca	3896.07	1.07005	0.248832	4.30029	1.70578e-05	0.000141126
Sec23b	581.244	-0.951185	0.221201	-4.3001	1.70724e-05	0.000141165
Bst1	33.9375	-2.57882	0.599902	-4.29873	1.71776e-05	0.000141952
Wnt9b	60.3549	-2.26231	0.526308	-4.29846	1.71988e-05	0.000142043
Myo1b	680.202	-0.851876	0.198194	-4.2982	1.72194e-05	0.00014213
Arid4a	657.303	0.732733	0.170541	4.29652	1.73497e-05	0.000143122
Runx1t1	220.506	1.00798	0.23469	4.29496	1.74729e-05	0.000144054
Rab15	2919.39	-0.611254	0.142359	-4.29374	1.75687e-05	0.00014476
F11r	154.842	-1.18401	0.275774	-4.2934	1.7596e-05	0.000144901
Cyp27a1	98.6763	-1.40311	0.327066	-4.28999	1.78679e-05	0.000147054
Aard	21.8795	2.52251	0.58805	4.28962	1.78982e-05	0.000147218
Sorcs2	745.842	0.761939	0.177667	4.28858	1.79816e-05	0.000147818
Pten	1630.93	0.570203	0.132967	4.28831	1.80037e-05	0.000147913
Gpm6b	8435.53	0.868497	0.202591	4.28694	1.81149e-05	0.00014874
Rfesd	172.727	1.05374	0.245951	4.28435	1.83276e-05	0.000150399
RGD1306556	855.259	0.814451	0.190129	4.28367	1.83835e-05	0.00015077
Cadm2	1306.62	1.19276	0.278458	4.28347	1.84003e-05	0.00015082
Hacd3	1874.44	0.535081	0.124922	4.28331	1.84132e-05	0.000150839
Nabp1	347.917	-1.26342	0.295131	-4.28087	1.8616e-05	0.000152412
Rbm19	302.925	-0.784266	0.183218	-4.28051	1.86466e-05	0.000152574
Clec10a	43.5115	-1.92192	0.449102	-4.27948	1.87329e-05	0.000153191
Mybpc1	191.899	-1.14663	0.268075	-4.27726	1.89205e-05	0.000154546
Ralb	477.733	-0.646233	0.151082	-4.27736	1.89119e-05	0.000154546
Sppl2b	636.191	-0.737925	0.172581	-4.27582	1.90436e-05	0.000155462
Dusp2	60.9887	-1.90608	0.445911	-4.27458	1.91502e-05	0.000156242
Adhfe1	310.921	1.09172	0.255417	4.27426	1.91773e-05	0.000156373
Heatr1	550.7	-0.945478	0.221252	-4.27331	1.92589e-05	0.000156948
Nrxn3	4231.93	-0.565685	0.132382	-4.27313	1.92746e-05	0.000156986
RGD1560883	176.213	1.03526	0.242338	4.27198	1.93748e-05	0.00015771
Clec4e	13.2903	-6.09608	1.42746	-4.27058	1.94961e-05	0.000158607
Znhit6	552.972	-0.577135	0.135253	-4.26709	1.98044e-05	0.000161021
Fxyd1	125.803	1.31261	0.307782	4.26473	2.00146e-05	0.000162637
Nell2	6545.66	0.930999	0.218366	4.26349	2.01261e-05	0.000163449
Axin2	171.941	1.1883	0.278742	4.26308	2.01633e-05	0.000163638
Zdhhc14	788.491	-1.09187	0.256129	-4.26297	2.01725e-05	0.000163638
Aars1	5212.11	-0.712226	0.167106	-4.26212	2.02495e-05	0.000164168
Slc2a9	27.3097	-2.36449	0.554912	-4.26102	2.03499e-05	0.000164888
Abce1	2040.19	-0.509774	0.119649	-4.26058	2.039e-05	0.000165118
Cryl1	115.606	1.14493	0.268792	4.25953	2.04854e-05	0.000165796
Rplp0	5701.77	-0.660628	0.155102	-4.25932	2.05049e-05	0.000165859
Artn	26.7416	-2.19911	0.516356	-4.2589	2.05432e-05	0.000166073
Mapk7	181.725	-1.01623	0.238627	-4.25867	2.05645e-05	0.00016615
Tmem106c	213.673	0.992752	0.233138	4.25821	2.0607e-05	0.000166399
Rida	404.27	0.913031	0.214464	4.25728	2.06932e-05	0.000167
Eif3g	1410.69	-0.686675	0.161305	-4.25699	2.07199e-05	0.00016709
Snx32	440.966	0.920736	0.216293	4.2569	2.07281e-05	0.00016709
Ppp1r10	1254.86	-0.510988	0.120045	-4.25664	2.07518e-05	0.000167186
Chst11	334.607	-0.977389	0.229634	-4.25628	2.07852e-05	0.000167359
Serp1	1906.19	-0.576842	0.135535	-4.25603	2.08086e-05	0.000167452
Cobl	1772.44	0.854815	0.200855	4.25589	2.08222e-05	0.000167467
Gadd45g	776.8	-3.25133	0.76411	-4.25505	2.09003e-05	0.000167999
Abcg4	581.54	0.922987	0.21701	4.25321	2.10731e-05	0.000169291
Emilin3	21.5572	-3.19728	0.752019	-4.25159	2.12258e-05	0.000170325
Icam2	67.3217	-1.35874	0.319583	-4.2516	2.12251e-05	0.000170325
Nbea	4380.98	0.568999	0.133864	4.25057	2.13225e-05	0.000171004
Tmem185b	487.733	-0.600889	0.141424	-4.24885	2.14868e-05	0.000172224
Kcnn2	368.303	1.01431	0.238777	4.24797	2.15721e-05	0.000172809
Tceal3	1153.52	0.882385	0.207787	4.24659	2.17049e-05	0.000173774
Zfp36l2	887.698	-0.843838	0.198727	-4.24621	2.17412e-05	0.000173967
Disp2	4746.2	0.85283	0.200894	4.24517	2.18431e-05	0.000174486
Jak1	5806.48	-0.618566	0.145709	-4.24522	2.18374e-05	0.000174486
Matn4	33.6912	3.76625	0.887133	4.24542	2.18187e-05	0.000174486
Eif2b1	482.117	-0.763914	0.179974	-4.24459	2.1899e-05	0.000174708
Ppfia4	613.01	0.793266	0.186893	4.2445	2.1908e-05	0.000174708
Tet1	68.5349	1.50219	0.353894	4.24475	2.18839e-05	0.000174708
Pde4a	589.332	0.980402	0.231052	4.24321	2.20341e-05	0.000175614
Hnrnpa1	4296.04	-0.605165	0.142626	-4.24301	2.20541e-05	0.000175675
Ntrk2	7297.09	0.61572	0.145133	4.24247	2.21077e-05	0.000176002
Thrap3	3462.36	-0.47362	0.111646	-4.24215	2.21386e-05	0.000176149
Itgb7	19.0548	-3.86916	0.912182	-4.24165	2.21882e-05	0.000176445
Arhgap22	173.662	-1.20924	0.28511	-4.24131	2.22218e-05	0.000176478
Bnip2	640.929	-0.791117	0.186521	-4.24142	2.22106e-05	0.000176478
Usp11	1435.23	1.00206	0.236267	4.24123	2.223e-05	0.000176478
Trim27	486.228	-0.614592	0.144933	-4.24051	2.23012e-05	0.000176945
Tbl3	329.447	-0.751578	0.177266	-4.23985	2.23674e-05	0.00017737
Aimp2	283.738	-0.786232	0.185454	-4.2395	2.24022e-05	0.000177547
Map1lc3a	1767.12	-0.505336	0.119209	-4.23906	2.24461e-05	0.000177794
Wwox	65.848	1.54028	0.363371	4.23886	2.2466e-05	0.000177852
Il33	610.299	-1.23682	0.291837	-4.23805	2.25474e-05	0.000178297
Ssbp3	1612.25	-0.5265	0.124229	-4.23815	2.25369e-05	0.000178297
Sdad1	503.233	-0.669762	0.158054	-4.23755	2.25973e-05	0.000178592
Noc3l	395.477	-0.68459	0.161625	-4.23568	2.27866e-05	0.000179987
Cep76	257.67	-0.726362	0.171523	-4.23479	2.28769e-05	0.000180599
Vim	2548.32	-1.52085	0.359224	-4.23371	2.29862e-05	0.000181362
Wdhd1	135.604	-1.25024	0.295333	-4.23334	2.30251e-05	0.000181567
Phf1	234.594	0.746799	0.176542	4.23014	2.33542e-05	0.000184059
Serpinb6a	411.755	-1.13309	0.26791	-4.22936	2.34357e-05	0.000184598
Sncb	3911.24	0.843929	0.199641	4.22724	2.3657e-05	0.000186238
Ank2	14289.4	0.74042	0.175175	4.22675	2.37095e-05	0.000186451
Eid1	4816.26	-0.558177	0.132059	-4.22674	2.37104e-05	0.000186451
Tspoap1	3169.51	1.01613	0.240416	4.22656	2.37292e-05	0.000186495
Pik3r1	2580.73	-0.743261	0.175884	-4.22586	2.38029e-05	0.00018697
Chn2	475.233	1.51064	0.357497	4.2256	2.38302e-05	0.000187081
Slc30a7	293.456	-0.92659	0.21944	-4.22253	2.4158e-05	0.000189548
Fam43a	457.739	-1.07936	0.255677	-4.22158	2.42598e-05	0.000190241
Mbd2	541.423	-0.749421	0.177537	-4.22122	2.42988e-05	0.000190442
Pwp2	640.757	-0.606294	0.143638	-4.221	2.43224e-05	0.000190521
Hace1	806.328	0.747277	0.177072	4.2202	2.44084e-05	0.000191089
Rsrc1	556.767	0.678945	0.160888	4.21999	2.44311e-05	0.00019116
Ncdn	6571.8	0.803757	0.190474	4.21977	2.44554e-05	0.000191242
Pinx1	133.756	-0.985936	0.233654	-4.21965	2.44686e-05	0.000191242
Glrb	2930.35	0.986519	0.233838	4.21882	2.45587e-05	0.00019184
Plekhm1	554.409	-0.649815	0.154042	-4.21844	2.46e-05	0.000192057
Abtb2	125.185	1.17696	0.27906	4.2176	2.46921e-05	0.000192477
Itprip	71.8598	-1.48429	0.351915	-4.21774	2.46759e-05	0.000192477
Lmo4	2649.43	0.879164	0.208453	4.21757	2.46947e-05	0.000192477
Ptms	3723.54	0.667714	0.158325	4.21737	2.47173e-05	0.000192518
Zfp266	1687.37	0.549871	0.130385	4.21728	2.47272e-05	0.000192518
Tyrobp	176.282	-1.22263	0.289948	-4.21673	2.47869e-05	0.000192877
Cebpz	898.283	-0.722225	0.171299	-4.21616	2.48503e-05	0.000193263
Zc3h7a	743.401	-0.530855	0.125925	-4.21564	2.4907e-05	0.000193598
Slc24a4	261.111	1.57108	0.372718	4.21519	2.49566e-05	0.000193876
Mtus2	503.781	0.847058	0.20096	4.21506	2.49708e-05	0.00019388
Prnp	11103.2	0.97127	0.230547	4.21289	2.52128e-05	0.000195651
Ccng1	5270.88	-0.541532	0.128573	-4.21186	2.53277e-05	0.000196436
Mob3c	101.94	-1.12329	0.266739	-4.21117	2.54047e-05	0.000196817
Ptprs	5252.59	0.770419	0.182943	4.21125	2.53959e-05	0.000196817
Sub1	4701.37	0.536657	0.127481	4.20971	2.55695e-05	0.000197985
Tmem238	102.099	-1.09934	0.261176	-4.20919	2.56292e-05	0.000198339
Cpt1c	600.66	0.849795	0.201909	4.20879	2.56741e-05	0.000198577
Gnpat	787.691	0.641298	0.15239	4.20827	2.57335e-05	0.000198928
Skil	3267.07	-0.549648	0.130618	-4.20805	2.57584e-05	0.000199011
Fnbp1l	2627.11	0.567758	0.134953	4.20708	2.58696e-05	0.000199761
Gabra1	7337.94	0.905233	0.215188	4.2067	2.59121e-05	0.00019998
Dot1l	1191.53	-0.941652	0.224009	-4.20363	2.62663e-05	0.000202363
Pafah1b3	114.861	-1.0355	0.246331	-4.20369	2.62604e-05	0.000202363
Pnpla7	329.698	0.966643	0.22996	4.20353	2.62782e-05	0.000202363
Zdhhc5	1586.49	-0.577555	0.137393	-4.20368	2.62609e-05	0.000202363
Ccdc177	157.753	1.46066	0.347538	4.20289	2.63528e-05	0.000202496
Hsf2bp	29.6631	-2.74326	0.652692	-4.203	2.63403e-05	0.000202496
Napb	5707.43	0.864223	0.205624	4.20293	2.63487e-05	0.000202496
Psmd5	657.201	-0.595956	0.141792	-4.20304	2.63359e-05	0.000202496
Des	137.07	-1.8266	0.434619	-4.20276	2.6368e-05	0.000202503
Dgcr8	824.491	-0.71479	0.170134	-4.20135	2.65329e-05	0.000203659
Rps20	2283.4	-0.636714	0.151561	-4.20104	2.65691e-05	0.000203826
Mdp1	243.909	0.967057	0.230359	4.19805	2.69227e-05	0.000206368
Svop	1804.19	0.816278	0.194445	4.19799	2.69296e-05	0.000206368
Cep70	119.66	1.04076	0.247953	4.19739	2.70004e-05	0.000206798
Cd55	117.004	-1.83353	0.436882	-4.19685	2.70656e-05	0.000207185
Sh3glb2	1175.33	0.943005	0.224806	4.19475	2.73178e-05	0.000209002
Pfkfb3	1131.35	-1.16672	0.278186	-4.19404	2.7403e-05	0.000209541
Kidins220	5983.69	0.622605	0.148458	4.1938	2.74319e-05	0.000209649
Pja2	12555.9	0.657403	0.156804	4.19252	2.75875e-05	0.000210724
Als2cl	135.49	1.26812	0.302494	4.1922	2.76266e-05	0.000210909
Ubap2	952.068	-0.483687	0.115398	-4.19148	2.7714e-05	0.000211462
Tbr1	1581.6	1.51637	0.361907	4.18993	2.79037e-05	0.000212794
Rmdn1	211.636	0.843014	0.201227	4.18936	2.79737e-05	0.000213213
Prdm1	27.7587	-1.9503	0.46557	-4.18905	2.80119e-05	0.000213274
Vopp1	1807.44	0.779243	0.186014	4.18917	2.79979e-05	0.000213274
Ptpn3	697.698	0.78614	0.187684	4.18864	2.80629e-05	0.000213547
Thrb	1682.75	0.712302	0.170065	4.1884	2.80924e-05	0.000213656
Ccdc13	40.9989	1.71554	0.409669	4.18762	2.8189e-05	0.000214276
Nsg1	2676.07	0.741732	0.177169	4.18659	2.83173e-05	0.000215135
Trmt61a	315.998	-0.824578	0.197058	-4.18444	2.8587e-05	0.000217023
Vcan	1575.26	-0.889738	0.212634	-4.18437	2.85964e-05	0.000217023
Shroom1	72.1077	1.24734	0.29817	4.18333	2.87264e-05	0.000217892
Aldh1a3	38.4603	-2.91996	0.698225	-4.18197	2.8899e-05	0.000219084
Gpr75	213.952	0.791103	0.189235	4.18053	2.90829e-05	0.000220359
Adamts1	1873.71	-2.75342	0.65869	-4.18015	2.91319e-05	0.000220612
Plpp4	163.924	-1.43239	0.34279	-4.17863	2.93274e-05	0.000221974
Sema5b	348.596	-0.968851	0.231983	-4.1764	2.96162e-05	0.00022404
Dmrtb1	37.4882	1.79783	0.430573	4.17542	2.97435e-05	0.000224883
Tenm2	753.238	1.19944	0.287444	4.1728	3.00877e-05	0.000227357
Tmem100	1324.35	-1.04905	0.25141	-4.17269	3.0103e-05	0.000227357
Maged2	352.381	0.658827	0.157943	4.17129	3.02885e-05	0.000228636
Clec3b	16.5548	3.13555	0.751898	4.17018	3.04353e-05	0.00022954
Phkb	960.996	0.919955	0.220605	4.17014	3.04408e-05	0.00022954
Isca1	1998.79	0.534187	0.128115	4.1696	3.0513e-05	0.000229962
Cacnb1	2085.84	-0.606874	0.145573	-4.16888	3.06106e-05	0.000230364
Ccl12	21.2591	-3.81052	0.914012	-4.16901	3.0593e-05	0.000230364
Chrdl1	211.02	1.06596	0.255705	4.16872	3.06315e-05	0.000230364
Taldo1	1373.92	-0.489868	0.117508	-4.16881	3.06196e-05	0.000230364
Cit	1320.75	0.950986	0.228146	4.16833	3.06843e-05	0.000230638
RGD1564053	173.958	1.58115	0.379413	4.16735	3.08161e-05	0.000231383
Syn2	3078.99	0.799147	0.191763	4.16738	3.08122e-05	0.000231383
Sstr4	215.596	-1.53026	0.367346	-4.16572	3.10371e-05	0.000232918
Ltk	89.513	1.30231	0.312778	4.16369	3.13145e-05	0.000234875
Armcx4	1387.9	-0.566499	0.136085	-4.16283	3.14324e-05	0.000235635
Dio2	1105.71	0.866592	0.208194	4.16242	3.14897e-05	0.000235939
Pitpnm3	1341.11	0.538853	0.12952	4.16037	3.17728e-05	0.000237934
Cds2	810.597	1.04207	0.250503	4.15993	3.18345e-05	0.00023827
Pa2g4	2040.02	-0.808845	0.194583	-4.15682	3.22707e-05	0.000241407
Nop58	1205.03	-1.00153	0.240959	-4.15644	3.2324e-05	0.000241677
Mmp19	102.749	-1.62518	0.391215	-4.15419	3.26448e-05	0.000243947
Gpr63	232.141	0.887498	0.21373	4.15243	3.28957e-05	0.000245692
Bid	354.727	-1.63739	0.394357	-4.15206	3.29495e-05	0.000245964
Pno1	685.316	-0.83724	0.201668	-4.15157	3.30201e-05	0.000246231
Sec61a1	1172.36	-0.766443	0.184611	-4.15167	3.3006e-05	0.000246231
L1cam	1895.22	0.855346	0.20604	4.15135	3.3052e-05	0.000246338
She	132.979	-1.03189	0.248592	-4.15093	3.31131e-05	0.000246664
Sstr3	359.841	-0.888861	0.214191	-4.14985	3.32689e-05	0.000247694
Ndufs4	1274.73	0.636375	0.153378	4.14907	3.33825e-05	0.000248408
Ak4	602.797	0.863257	0.208095	4.14837	3.34844e-05	0.000248905
Tsc22d2	547.866	-0.63217	0.15239	-4.14838	3.34831e-05	0.000248905
Mex3c	1027.01	-0.749503	0.18068	-4.14823	3.35061e-05	0.000248935
Timp3	471.14	-1.04386	0.25171	-4.1471	3.36714e-05	0.000250032
Osbp2	824.681	0.801881	0.193396	4.14631	3.37875e-05	0.000250631
Ppp1r1b	1341.24	1.2755	0.307621	4.14633	3.3785e-05	0.000250631
Cntnap5a	78.1629	1.89114	0.456313	4.14439	3.40727e-05	0.000252495
Gstt3	222.501	1.61333	0.389281	4.14437	3.40746e-05	0.000252495
Prag1	577.138	-0.947471	0.228679	-4.14324	3.4243e-05	0.00025361
Tbc1d16	538.484	0.758419	0.18312	4.14166	3.44806e-05	0.000255236
Megf6	66.0696	-1.52663	0.36865	-4.14114	3.45583e-05	0.000255677
Ednrb	727.463	-0.987728	0.238529	-4.14091	3.45938e-05	0.000255806
Dhcr24	2567.47	-1.07196	0.259051	-4.13803	3.50304e-05	0.000258899
Matn2	258.81	0.866794	0.209516	4.13713	3.51683e-05	0.000259782
Gstk1	102.619	1.09519	0.264913	4.13415	3.56266e-05	0.00026303
Avpr1a	32.8471	-2.01669	0.487893	-4.13348	3.57318e-05	0.000263669
Btbd2	653.419	0.814062	0.196959	4.13316	3.5781e-05	0.000263894
Kcnk9	213.017	0.911322	0.220535	4.13232	3.59127e-05	0.000264727
Cyp27b1	136.935	-4.96753	1.20239	-4.13139	3.6057e-05	0.000265514
Dcun1d4	1356.22	0.720672	0.174438	4.1314	3.60555e-05	0.000265514
Pcsk6	366.834	-1.19299	0.288853	-4.1301	3.62601e-05	0.000266871
Crabp1	43.6513	1.6551	0.400882	4.12865	3.64896e-05	0.00026842
Nell1	398.687	1.13332	0.274515	4.12844	3.65233e-05	0.000268528
Usp10	915.581	-0.605272	0.146654	-4.12721	3.67185e-05	0.000269823
Sfmbt2	99.9305	-1.65732	0.401578	-4.12702	3.675e-05	0.000269914
Clptm1l	1523.58	-0.529942	0.128479	-4.12474	3.71161e-05	0.000272461
Slc35f5	293.955	-0.735997	0.178444	-4.12454	3.7148e-05	0.000272554
Sall2	535.34	0.793191	0.192444	4.12166	3.76151e-05	0.000275837
Rhpn2	73.6028	1.35388	0.328505	4.12134	3.7668e-05	0.000276082
Vwa2	27.6962	-2.48104	0.602065	-4.12088	3.77421e-05	0.000276482
Zfp646	623.365	-0.921632	0.223682	-4.12028	3.78406e-05	0.00027706
Ppib	1276.06	-0.503064	0.122112	-4.11969	3.79375e-05	0.000277626
B4gat1	724.339	0.859375	0.208617	4.1194	3.79867e-05	0.000277819
Ndufb4	1016.45	0.78618	0.190853	4.1193	3.80032e-05	0.000277819
Synm	717.531	0.827646	0.200989	4.11787	3.82389e-05	0.000279397
Cdh8	438.549	1.05507	0.25633	4.11604	3.85431e-05	0.000281474
Exd2	1170.83	0.742991	0.180551	4.11512	3.86973e-05	0.000282454
Picalm	5860.64	-0.780966	0.189868	-4.1132	3.90207e-05	0.000284668
Srcin1	3438.46	0.75549	0.183752	4.11145	3.93176e-05	0.000286686
Sh3pxd2b	354.414	-1.35733	0.330252	-4.10999	3.95677e-05	0.000288361
Slc36a1	289.681	0.804067	0.195672	4.10927	3.96918e-05	0.000289116
Ch25h	187.168	-1.90715	0.46414	-4.10899	3.97399e-05	0.000289262
Rnf207	21.2444	2.22922	0.542533	4.10891	3.97527e-05	0.000289262
Itfg1	3484.54	0.669147	0.162865	4.10859	3.9809e-05	0.000289522
Nav2	1746.89	-1.07801	0.262436	-4.10772	3.99587e-05	0.000290461
Mpp7	53.4483	1.57952	0.38463	4.1066	4.01527e-05	0.000291721
Dnajc3	364.765	-0.711446	0.173286	-4.10561	4.03243e-05	0.000292689
Trim46	531.949	0.640452	0.155995	4.1056	4.03273e-05	0.000292689
Wasl	2033	0.53742	0.130908	4.10533	4.03736e-05	0.000292875
Gdf10	25.5777	1.89425	0.461594	4.10372	4.06552e-05	0.000294766
Ccdc125	56.5433	-1.27243	0.310192	-4.10209	4.09444e-05	0.00029671
Cebpb	106.845	-1.86495	0.454772	-4.10084	4.11653e-05	0.000298006
Mansc1	90.9469	1.18225	0.288292	4.10089	4.11569e-05	0.000298006
Pfdn4	402.63	-0.69608	0.169764	-4.10028	4.12652e-05	0.000298576
Dgke	425.14	0.917502	0.223826	4.09917	4.14629e-05	0.000299853
Capn2	2321.24	-0.748564	0.182637	-4.09864	4.15592e-05	0.000300396
Ypel3	1415.09	0.842976	0.205844	4.09522	4.21765e-05	0.000304701
Cbx8	59.6994	1.30503	0.318727	4.0945	4.23074e-05	0.000305491
Wdr47	2662.17	0.626819	0.153108	4.09396	4.24064e-05	0.000306049
Pmaip1	346.318	-1.49052	0.364128	-4.09338	4.25133e-05	0.000306537
Spata6l	229.593	0.958486	0.234159	4.09331	4.25263e-05	0.000306537
Unc5d	162.876	0.803358	0.196265	4.09324	4.2539e-05	0.000306537
Prkab2	670.458	-1.17748	0.287732	-4.09228	4.27158e-05	0.000307654
Asnsd1	896.104	-0.522424	0.127676	-4.09179	4.28063e-05	0.000308149
Col6a2	266.005	-0.947945	0.231785	-4.08977	4.31808e-05	0.000310686
Atf6	1310.72	-0.524185	0.128176	-4.08957	4.32169e-05	0.000310788
Egr3	741.807	-1.17116	0.286443	-4.08863	4.33936e-05	0.0003119
Mybbp1a	1458.63	-0.743453	0.181874	-4.08775	4.3558e-05	0.000312922
Brd2	2555.95	-0.466879	0.114219	-4.08757	4.35911e-05	0.000313001
Prok2	26.4921	-2.33007	0.570064	-4.08739	4.3626e-05	0.000313093
Rab40b	418.171	0.89133	0.218086	4.08706	4.3688e-05	0.000313378
Tmem202	37.2515	-1.64767	0.403171	-4.08676	4.37432e-05	0.000313615
Bbs2	417.917	0.768374	0.188023	4.08658	4.37771e-05	0.000313699
Stat6	264.728	-1.20573	0.295087	-4.08602	4.3883e-05	0.000314298
Satb1	981.357	1.23329	0.301844	4.08585	4.39151e-05	0.000314369
Gpnmb	2087.59	-1.4044	0.343818	-4.08471	4.41315e-05	0.000315758
Vipr2	51.8215	1.8966	0.464408	4.0839	4.42867e-05	0.000316708
Slc1a3	12021.2	0.73375	0.179692	4.08338	4.4386e-05	0.000317258
Slc8a3	398.365	-0.820155	0.200872	-4.08297	4.44639e-05	0.000317654
Kyat3	114.108	1.52496	0.373516	4.08271	4.45134e-05	0.000317847
Gtpbp4	652.254	-0.880378	0.215729	-4.08095	4.48529e-05	0.000320109
Ccl2	1750.45	-6.0709	1.48778	-4.08052	4.49346e-05	0.00032053
Herc2	5284.87	0.519214	0.127254	4.08014	4.50085e-05	0.000320896
Yae1	851.945	-0.648463	0.158952	-4.07961	4.51109e-05	0.000321463
Slc6a5	335.811	-2.04291	0.501045	-4.0773	4.55624e-05	0.000324517
Cttn	1884.81	-0.520468	0.127672	-4.0766	4.56982e-05	0.000325321
Lrfn1	592.727	-0.644984	0.158223	-4.07641	4.57354e-05	0.000325421
Larp4b	2270.12	-0.485548	0.119117	-4.07624	4.57698e-05	0.000325502
Map4k4	4569.59	-0.668655	0.164062	-4.07562	4.58923e-05	0.000326209
Atrx	4654.62	0.547603	0.134366	4.07546	4.59226e-05	0.000326261
Maob	880.586	0.512541	0.125772	4.07516	4.59821e-05	0.000326519
Snapc2	482.359	0.637058	0.156397	4.07334	4.63443e-05	0.000328925
Sox21	135.366	1.58001	0.387915	4.07308	4.63956e-05	0.000329125
Ltbp1	425.353	-2.93109	0.719807	-4.07205	4.6602e-05	0.000330423
Zfp354c	255.997	0.739449	0.181619	4.07142	4.67272e-05	0.000331144
Erg	195.607	-1.00676	0.247359	-4.07005	4.70022e-05	0.000332927
Slf2	1412.64	0.568553	0.139725	4.06908	4.71986e-05	0.00033415
Ccdc170	10.5206	3.658	0.899446	4.06694	4.76335e-05	0.000336946
Dcbld2	434.777	-0.795375	0.195572	-4.06691	4.76412e-05	0.000336946
Syndig1	348.617	1.32091	0.324828	4.06649	4.77259e-05	0.000337376
[truncated: 15,269 more rows]
