# Supplementary material for: Acupuncture Extended the Thrombolysis Window by Suppressing Blood–Brain Barrier Disruption and Regulating Autophagy–Apoptosis Balance after Ischemic Stroke
Source: Brain Sci. 2024 Apr 19;14(4):399. doi: 10.3390/brainsci14040399 (PMC11048240; doi:10.3390/brainsci14040399)
Supplement: Supplementary file 1 [file brainsci-14-00399-s001.zip › Table S2.xlsx]

## Sheet: Sheet 1
ONTOLOGY	ID	Description	GeneRatio	BgRatio	pvalue	p.adjust	qvalue	geneID	Count
BP	GO:0050900	leukocyte migration	15/61	391/18112	2.2558e-12	5.00336e-09	3.23647e-09	Sele/Ripk3/Spp1/Ccl4/Trem1/Itgal/Prss56/Il1b/Anxa1/Edn1/Selp/Itgb3/Itgb7/Ccr2/Cxcr2	15
BP	GO:0002685	regulation of leukocyte migration	12/61	236/18112	1.79527e-11	1.99095e-08	1.28787e-08	Sele/Ripk3/Ccl4/Trem1/Prss56/Il1b/Anxa1/Edn1/Selp/Itgb3/Ccr2/Cxcr2	12
BP	GO:0002687	positive regulation of leukocyte migration	10/61	160/18112	1.33552e-10	9.87397e-08	6.38708e-08	Sele/Ccl4/Trem1/Prss56/Il1b/Edn1/Selp/Itgb3/Ccr2/Cxcr2	10
BP	GO:0045123	cellular extravasation	7/61	79/18112	8.26807e-09	4.58465e-06	2.96563e-06	Sele/Ripk3/Trem1/Itgal/Selp/Itgb7/Ccr2	7
BP	GO:0007159	leukocyte cell-cell adhesion	11/61	376/18112	4.40184e-08	1.59108e-05	1.02921e-05	Sele/Olr1/Itgal/Ptprc/Il1b/Anxa1/Selp/Il2rg/Itgb7/Ccr2/Bmp7	11
BP	GO:0033280	response to vitamin D	6/61	60/18112	4.92923e-08	1.59108e-05	1.02921e-05	Kl/Spp1/Trem1/Tnc/Il1b/Bmp7	6
BP	GO:0002690	positive regulation of leukocyte chemotaxis	7/61	103/18112	5.30765e-08	1.59108e-05	1.02921e-05	Ccl4/Trem1/Prss56/Il1b/Edn1/Ccr2/Cxcr2	7
BP	GO:0045785	positive regulation of cell adhesion	12/61	481/18112	5.73878e-08	1.59108e-05	1.02921e-05	Sele/Spp1/Trem1/Itgal/Ptprc/Il1b/Anxa1/Selp/Il2rg/Itgb3/Ccr2/Bmp7	12
BP	GO:0030595	leukocyte chemotaxis	9/61	233/18112	8.01791e-08	1.97597e-05	1.27818e-05	Spp1/Ccl4/Trem1/Prss56/Il1b/Anxa1/Edn1/Ccr2/Cxcr2	9
BP	GO:0007229	integrin-mediated signaling pathway	7/61	111/18112	8.90984e-08	1.9762e-05	1.27833e-05	Adamts2/Ccn2/Fgr/Itga11/Itgal/Itgb3/Itgb7	7
BP	GO:0032743	positive regulation of interleukin-2 production	5/61	39/18112	1.93284e-07	3.8973e-05	2.52101e-05	Clec7a/Ptprc/Il1b/Anxa1/Ccr2	5
BP	GO:0071674	mononuclear cell migration	8/61	188/18112	2.13658e-07	3.94912e-05	2.55453e-05	Ripk3/Ccl4/Trem1/Itgal/Anxa1/Itgb3/Itgb7/Ccr2	8
BP	GO:0071621	granulocyte chemotaxis	7/61	128/18112	2.37192e-07	4.04686e-05	2.61775e-05	Spp1/Ccl4/Trem1/Il1b/Anxa1/Edn1/Cxcr2	7
BP	GO:0042060	wound healing	11/61	452/18112	2.8132e-07	4.32722e-05	2.79911e-05	Clec7a/Fmod/Prss56/Tnc/Il1b/Anxa1/Selp/Eppk1/Itgb3/P2ry2/Cd109	11
BP	GO:0002688	regulation of leukocyte chemotaxis	7/61	132/18112	2.92643e-07	4.32722e-05	2.79911e-05	Ccl4/Trem1/Prss56/Il1b/Edn1/Ccr2/Cxcr2	7
BP	GO:0022409	positive regulation of cell-cell adhesion	9/61	292/18112	5.41331e-07	7.09198e-05	4.58752e-05	Sele/Itgal/Ptprc/Il1b/Anxa1/Selp/Il2rg/Ccr2/Bmp7	9
BP	GO:0019722	calcium-mediated signaling	8/61	214/18112	5.73217e-07	7.09198e-05	4.58752e-05	Clec7a/Ccl4/Itgal/Ptprc/Edn1/Selp/Ccr2/Cxcr2	8
BP	GO:0050867	positive regulation of cell activation	10/61	385/18112	5.75544e-07	7.09198e-05	4.58752e-05	Ccn2/Clec7a/Fgr/Itgal/Ptprc/Il1b/Anxa1/Selp/Il2rg/Ccr2	10
BP	GO:0006869	lipid transport	10/61	391/18112	6.62641e-07	7.73547e-05	5.00377e-05	Spp1/Il1b/Atp8b1/Anxa1/Edn1/Itgb3/P2ry2/Kcnn4/Fabp4/Crabp2	10
BP	GO:0097529	myeloid leukocyte migration	8/61	230/18112	9.87897e-07	0.000102639	6.63928e-05	Spp1/Ccl4/Trem1/Il1b/Anxa1/Edn1/Ccr2/Cxcr2	8
BP	GO:0097530	granulocyte migration	7/61	158/18112	9.88813e-07	0.000102639	6.63928e-05	Spp1/Ccl4/Trem1/Il1b/Anxa1/Edn1/Cxcr2	7
BP	GO:0060326	cell chemotaxis	9/61	315/18112	1.01806e-06	0.000102639	6.63928e-05	Spp1/Ccl4/Trem1/Prss56/Il1b/Anxa1/Edn1/Ccr2/Cxcr2	9
BP	GO:0050921	positive regulation of chemotaxis	7/61	160/18112	1.07603e-06	0.000103767	6.71226e-05	Ccl4/Trem1/Prss56/Il1b/Edn1/Ccr2/Cxcr2	7
BP	GO:0030593	neutrophil chemotaxis	6/61	103/18112	1.25858e-06	0.000113307	7.32941e-05	Spp1/Ccl4/Trem1/Il1b/Edn1/Cxcr2	6
BP	GO:0006909	phagocytosis	8/61	238/18112	1.27714e-06	0.000113307	7.32941e-05	Clec7a/Fgr/Ptprc/Il1b/Anxa1/Il2rg/Itgb3/Ccr2	8
BP	GO:0015908	fatty acid transport	6/61	104/18112	1.33217e-06	0.000113644	7.35118e-05	Il1b/Anxa1/Edn1/P2ry2/Fabp4/Crabp2	6
BP	GO:1903039	positive regulation of leukocyte cell-cell adhesion	8/61	241/18112	1.40282e-06	0.000115239	7.45434e-05	Sele/Itgal/Ptprc/Il1b/Anxa1/Selp/Il2rg/Ccr2	8
BP	GO:0070555	response to interleukin-1	7/61	171/18112	1.67969e-06	0.000129418	8.37151e-05	Sele/Ccl4/Adamts7/Il1b/Anxa1/Edn1/P2ry2	7
BP	GO:0030199	collagen fibril organization	5/61	60/18112	1.73685e-06	0.000129418	8.37151e-05	Adamts2/Acan/Adamts7/Fmod/Aebp1	5
BP	GO:0001503	ossification	10/61	438/18112	1.84831e-06	0.000129418	8.37151e-05	Acan/Kl/Ccn2/Ostn/Fgr/Spp1/Adamts7/Ifitm1/P2ry2/Bmp7	10
BP	GO:0072676	lymphocyte migration	6/61	110/18112	1.85125e-06	0.000129418	8.37151e-05	Ripk3/Ccl4/Itgal/Itgb3/Itgb7/Ccr2	6
BP	GO:0019932	second-messenger-mediated signaling	9/61	339/18112	1.86716e-06	0.000129418	8.37151e-05	Adcyap1/Clec7a/Ccl4/Itgal/Ptprc/Edn1/Selp/Ccr2/Cxcr2	9
BP	GO:0034113	heterotypic cell-cell adhesion	5/61	62/18112	2.0473e-06	0.000137604	8.90104e-05	Ptprc/Il1b/Itgb3/Itgb7/Bmp7	5
BP	GO:0010876	lipid localization	10/61	452/18112	2.44931e-06	0.000159781	0.000103356	Spp1/Il1b/Atp8b1/Anxa1/Edn1/Itgb3/P2ry2/Kcnn4/Fabp4/Crabp2	10
BP	GO:0033273	response to vitamin	7/61	185/18112	2.83591e-06	0.000179715	0.000116251	Bdnf/Kl/Spp1/Trem1/Tnc/Il1b/Bmp7	7
BP	GO:0072678	T cell migration	5/61	67/18112	3.01639e-06	0.000181916	0.000117674	Ripk3/Itgal/Itgb3/Itgb7/Ccr2	5
BP	GO:0022407	regulation of cell-cell adhesion	10/61	463/18112	3.03466e-06	0.000181916	0.000117674	Wnt1/Sele/Itgal/Ptprc/Il1b/Anxa1/Selp/Il2rg/Ccr2/Bmp7	10
BP	GO:0032623	interleukin-2 production	5/61	68/18112	3.24741e-06	0.000184686	0.000119466	Clec7a/Ptprc/Il1b/Anxa1/Ccr2	5
BP	GO:0032663	regulation of interleukin-2 production	5/61	68/18112	3.24741e-06	0.000184686	0.000119466	Clec7a/Ptprc/Il1b/Anxa1/Ccr2	5
BP	GO:1990266	neutrophil migration	6/61	129/18112	4.67903e-06	0.000259452	0.000167829	Spp1/Ccl4/Trem1/Il1b/Edn1/Cxcr2	6
BP	GO:0050901	leukocyte tethering or rolling	4/61	36/18112	6.32679e-06	0.000342264	0.000221397	Sele/Selp/Itgb7/Ccr2	4
BP	GO:0019221	cytokine-mediated signaling pathway	9/61	426/18112	1.18862e-05	0.000627706	0.000406038	Traip/Ccl4/Ptprc/Il1b/Ifitm1/Edn1/Il2rg/Ccr2/Cxcr2	9
BP	GO:0002437	inflammatory response to antigenic stimulus	5/61	89/18112	1.22501e-05	0.000631876	0.000408736	Adcyap1/Cd68/Il1b/Ccr2/Cxcr2	5
BP	GO:0072683	T cell extravasation	3/61	14/18112	1.28862e-05	0.000635146	0.000410851	Ripk3/Itgal/Ccr2	3
BP	GO:1903238	positive regulation of leukocyte tethering or rolling	3/61	14/18112	1.28862e-05	0.000635146	0.000410851	Sele/Selp/Ccr2	3
BP	GO:0033077	T cell differentiation in thymus	5/61	91/18112	1.36543e-05	0.000658375	0.000425877	Wnt1/Ripk3/Ptprc/Il1b/Il2rg	5
BP	GO:0002691	regulation of cellular extravasation	4/61	45/18112	1.56448e-05	0.000731023	0.00047287	Sele/Ripk3/Selp/Ccr2	4
BP	GO:0050920	regulation of chemotaxis	7/61	241/18112	1.6021e-05	0.000731023	0.00047287	Ccl4/Trem1/Prss56/Il1b/Edn1/Ccr2/Cxcr2	7
BP	GO:1903037	regulation of leukocyte cell-cell adhesion	8/61	336/18112	1.61498e-05	0.000731023	0.00047287	Sele/Itgal/Ptprc/Il1b/Anxa1/Selp/Il2rg/Ccr2	8
BP	GO:0032308	positive regulation of prostaglandin secretion	3/61	16/18112	1.97299e-05	0.000875219	0.000566145	Il1b/Edn1/P2ry2	3
BP	GO:0015849	organic acid transport	8/61	347/18112	2.03585e-05	0.000885396	0.000572728	Bdnf/Il1b/Atp8b1/Anxa1/Edn1/P2ry2/Fabp4/Crabp2	8
BP	GO:0032103	positive regulation of response to external stimulus	9/61	459/18112	2.14738e-05	0.000915938	0.000592484	Clec7a/Ccl4/Trem1/Prss56/Il1b/Edn1/Ccr2/Cxcr2/Fabp4	9
BP	GO:0061756	leukocyte adhesion to vascular endothelial cell	4/61	51/18112	2.5847e-05	0.00107256	0.000693799	Sele/Selp/Itgb7/Ccr2	4
BP	GO:0032602	chemokine production	5/61	104/18112	2.61129e-05	0.00107256	0.000693799	Adcyap1/Clec7a/Trem1/Il1b/P2ry2	5
BP	GO:0032309	icosanoid secretion	4/61	52/18112	2.79306e-05	0.00112637	0.000728602	Il1b/Anxa1/Edn1/P2ry2	4
BP	GO:0002696	positive regulation of leukocyte activation	8/61	365/18112	2.9224e-05	0.00115748	0.000748728	Clec7a/Fgr/Itgal/Ptprc/Il1b/Anxa1/Il2rg/Ccr2	8
BP	GO:0007204	positive regulation of cytosolic calcium ion concentration	8/61	366/18112	2.97989e-05	0.00115954	0.000750063	Adcyap1/Ptprc/Il1b/Edn1/Itgb3/P2ry2/Ccr2/Cxcr2	8
BP	GO:0051249	regulation of lymphocyte activation	9/61	481/18112	3.10104e-05	0.00118588	0.000767099	Clec7a/Fgr/Ripk3/Itgal/Ptprc/Il1b/Anxa1/Il2rg/Ccr2	9
BP	GO:0032306	regulation of prostaglandin secretion	3/61	19/18112	3.38948e-05	0.00125298	0.000810501	Il1b/Edn1/P2ry2	3
BP	GO:1903236	regulation of leukocyte tethering or rolling	3/61	19/18112	3.38948e-05	0.00125298	0.000810501	Sele/Selp/Ccr2	3
BP	GO:0042102	positive regulation of T cell proliferation	5/61	111/18112	3.5743e-05	0.00129964	0.000840685	Itgal/Ptprc/Il1b/Anxa1/Ccr2	5
BP	GO:0031589	cell-substrate adhesion	8/61	377/18112	3.67753e-05	0.00131561	0.000851014	Wnt1/Ccn2/Itga11/Spp1/Trem1/Itgal/Itgb3/Itgb7	8
BP	GO:0007568	aging	8/61	379/18112	3.81801e-05	0.00134418	0.000869498	Bdnf/Acan/Kl/Ccn2/Cd68/Bcl2a1/Edn1/P2ry2	8
BP	GO:0032305	positive regulation of icosanoid secretion	3/61	20/18112	3.97806e-05	0.00137865	0.000891792	Il1b/Edn1/P2ry2	3
BP	GO:0001819	positive regulation of cytokine production	9/61	498/18112	4.06525e-05	0.00138162	0.000893715	Adcyap1/Clec7a/Fgr/Ccl4/Ptprc/Il1b/Anxa1/P2ry2/Ccr2	9
BP	GO:0042129	regulation of T cell proliferation	6/61	189/18112	4.11122e-05	0.00138162	0.000893715	Ripk3/Itgal/Ptprc/Il1b/Anxa1/Ccr2	6
BP	GO:0071622	regulation of granulocyte chemotaxis	4/61	58/18112	4.31167e-05	0.00142735	0.000923299	Trem1/Il1b/Edn1/Cxcr2	4
BP	GO:0060560	developmental growth involved in morphogenesis	7/61	288/18112	5.00266e-05	0.00163175	0.00105551	Pou4f3/Bdnf/Ostn/Spp1/Tnc/Edn1/Crabp2	7
BP	GO:0071715	icosanoid transport	4/61	61/18112	5.26355e-05	0.00166779	0.00107883	Il1b/Anxa1/Edn1/P2ry2	4
BP	GO:0140353	lipid export from cell	4/61	61/18112	5.26355e-05	0.00166779	0.00107883	Spp1/Il1b/Edn1/P2ry2	4
BP	GO:0050764	regulation of phagocytosis	5/61	122/18112	5.61964e-05	0.00175554	0.00113559	Clec7a/Fgr/Ptprc/Il1b/Il2rg	5
BP	GO:0071675	regulation of mononuclear cell migration	5/61	124/18112	6.07257e-05	0.00183903	0.00118959	Ripk3/Ccl4/Trem1/Itgb3/Ccr2	5
BP	GO:0030217	T cell differentiation	7/61	297/18112	6.07432e-05	0.00183903	0.00118959	Wnt1/Ripk3/Ptprc/Il1b/Anxa1/Il2rg/Ccr2	7
BP	GO:0032310	prostaglandin secretion	3/61	23/18112	6.13561e-05	0.00183903	0.00118959	Il1b/Edn1/P2ry2	3
BP	GO:0051251	positive regulation of lymphocyte activation	7/61	302/18112	6.74662e-05	0.00196428	0.00127062	Clec7a/Itgal/Ptprc/Il1b/Anxa1/Il2rg/Ccr2	7
BP	GO:0032368	regulation of lipid transport	5/61	127/18112	6.80425e-05	0.00196428	0.00127062	Spp1/Il1b/Edn1/Itgb3/P2ry2	5
BP	GO:0002822	regulation of adaptive immune response based on somatic recombination of immune receptors built from immunoglobulin superfamily domains	6/61	207/18112	6.8192e-05	0.00196428	0.00127062	Clec7a/Ripk3/Ptprc/Il1b/Anxa1/Ccr2	6
BP	GO:0051480	regulation of cytosolic calcium ion concentration	8/61	415/18112	7.22733e-05	0.00205516	0.0013294	Adcyap1/Ptprc/Il1b/Edn1/Itgb3/P2ry2/Ccr2/Cxcr2	8
BP	GO:0015718	monocarboxylic acid transport	5/61	129/18112	7.32858e-05	0.00205757	0.00133096	Il1b/Atp8b1/Anxa1/Edn1/P2ry2	5
BP	GO:2000401	regulation of lymphocyte migration	4/61	67/18112	7.61524e-05	0.00211132	0.00136573	Ripk3/Ccl4/Itgb3/Ccr2	4
BP	GO:0048670	regulation of collateral sprouting	3/61	25/18112	7.93019e-05	0.00214502	0.00138753	Bdnf/Spp1/Crabp2	3
BP	GO:2000193	positive regulation of fatty acid transport	3/61	25/18112	7.93019e-05	0.00214502	0.00138753	Il1b/Edn1/P2ry2	3
BP	GO:0030198	extracellular matrix organization	7/61	314/18112	8.61158e-05	0.00225206	0.00145677	Adamts2/Acan/Ccn2/Adamts7/Fmod/Aebp1/Itgb3	7
BP	GO:0050870	positive regulation of T cell activation	6/61	216/18112	8.62578e-05	0.00225206	0.00145677	Itgal/Ptprc/Il1b/Anxa1/Il2rg/Ccr2	6
BP	GO:0043062	extracellular structure organization	7/61	315/18112	8.78429e-05	0.00225206	0.00145677	Adamts2/Acan/Ccn2/Adamts7/Fmod/Aebp1/Itgb3	7
BP	GO:0032303	regulation of icosanoid secretion	3/61	26/18112	8.94308e-05	0.00225206	0.00145677	Il1b/Edn1/P2ry2	3
BP	GO:1904996	positive regulation of leukocyte adhesion to vascular endothelial cell	3/61	26/18112	8.94308e-05	0.00225206	0.00145677	Sele/Selp/Ccr2	3
BP	GO:0045229	external encapsulating structure organization	7/61	316/18112	8.95981e-05	0.00225206	0.00145677	Adamts2/Acan/Ccn2/Adamts7/Fmod/Aebp1/Itgb3	7
BP	GO:0002526	acute inflammatory response	5/61	135/18112	9.09018e-05	0.00225206	0.00145677	Adcyap1/Kl/Trem1/Il1b/Cxcr2	5
BP	GO:0007584	response to nutrient	7/61	317/18112	9.1382e-05	0.00225206	0.00145677	Bdnf/Kl/Spp1/Trem1/Tnc/Il1b/Bmp7	7
BP	GO:0002819	regulation of adaptive immune response	6/61	220/18112	9.54224e-05	0.00232579	0.00150446	Clec7a/Ripk3/Ptprc/Il1b/Anxa1/Ccr2	6
BP	GO:0071347	cellular response to interleukin-1	5/61	137/18112	9.74438e-05	0.00234924	0.00151963	Ccl4/Adamts7/Il1b/Edn1/P2ry2	5
BP	GO:0001655	urogenital system development	8/61	435/18112	0.000100257	0.00236827	0.00153194	Wnt1/Bdnf/Spp1/Tnc/Anxa1/Itgb3/Cxcr2/Bmp7	8
BP	GO:0015732	prostaglandin transport	3/61	27/18112	0.000100369	0.00236827	0.00153194	Il1b/Edn1/P2ry2	3
BP	GO:0001780	neutrophil homeostasis	3/61	28/18112	0.000112144	0.00256463	0.00165896	Anxa1/Ccr2/Cxcr2	3
BP	GO:0090023	positive regulation of neutrophil chemotaxis	3/61	28/18112	0.000112144	0.00256463	0.00165896	Il1b/Edn1/Cxcr2	3
BP	GO:0031099	regeneration	7/61	328/18112	0.000112991	0.00256463	0.00165896	Wnt1/Bdnf/Spp1/Tnc/Anxa1/Ucn2/Eppk1	7
BP	GO:0042098	T cell proliferation	6/61	227/18112	0.000113316	0.00256463	0.00165896	Ripk3/Itgal/Ptprc/Il1b/Anxa1/Ccr2	6
BP	GO:0070098	chemokine-mediated signaling pathway	4/61	75/18112	0.000118357	0.00265168	0.00171527	Ccl4/Edn1/Ccr2/Cxcr2	4
BP	GO:0031960	response to corticosteroid	7/61	332/18112	0.000121812	0.00270178	0.00174768	Adcyap1/Ccn2/Il1b/Anxa1/Edn1/Ucn2/Fabp4	7
BP	GO:0032722	positive regulation of chemokine production	4/61	76/18112	0.00012462	0.00270987	0.00175291	Adcyap1/Clec7a/Il1b/P2ry2	4
BP	GO:0046635	positive regulation of alpha-beta T cell activation	4/61	76/18112	0.00012462	0.00270987	0.00175291	Ptprc/Anxa1/Il2rg/Ccr2	4
BP	GO:0007160	cell-matrix adhesion	6/61	234/18112	0.000133781	0.00288084	0.0018635	Ccn2/Itga11/Trem1/Itgal/Itgb3/Itgb7	6
BP	GO:0070374	positive regulation of ERK1 and ERK2 cascade	6/61	235/18112	0.00013693	0.00289421	0.00187215	Adcyap1/Ccn2/Ccl4/Ptprc/Il1b/Itgb3	6
BP	GO:0002825	regulation of T-helper 1 type immune response	3/61	30/18112	0.000138316	0.00289421	0.00187215	Il1b/Anxa1/Ccr2	3
BP	GO:0071624	positive regulation of granulocyte chemotaxis	3/61	30/18112	0.000138316	0.00289421	0.00187215	Il1b/Edn1/Cxcr2	3
BP	GO:0050863	regulation of T cell activation	7/61	343/18112	0.000148997	0.00308855	0.00199786	Ripk3/Itgal/Ptprc/Il1b/Anxa1/Il2rg/Ccr2	7
BP	GO:0032370	positive regulation of lipid transport	4/61	80/18112	0.000152089	0.00312347	0.00202045	Spp1/Il1b/Edn1/P2ry2	4
BP	GO:0050671	positive regulation of lymphocyte proliferation	5/61	151/18112	0.000153962	0.00313291	0.00202656	Itgal/Ptprc/Il1b/Anxa1/Ccr2	5
BP	GO:0032946	positive regulation of mononuclear cell proliferation	5/61	153/18112	0.000163734	0.00330146	0.00213559	Itgal/Ptprc/Il1b/Anxa1/Ccr2	5
BP	GO:0001516	prostaglandin biosynthetic process	3/61	32/18112	0.00016817	0.00333036	0.00215428	Il1b/Anxa1/Edn1	3
BP	GO:0046457	prostanoid biosynthetic process	3/61	32/18112	0.00016817	0.00333036	0.00215428	Il1b/Anxa1/Edn1	3
BP	GO:0032677	regulation of interleukin-8 production	4/61	84/18112	0.000183694	0.0035286	0.00228251	Clec7a/Ptprc/Il1b/Anxa1	4
BP	GO:0070371	ERK1 and ERK2 cascade	7/61	355/18112	0.000184075	0.0035286	0.00228251	Adcyap1/Ccn2/Ccl4/Ptprc/Il1b/Edn1/Itgb3	7
BP	GO:0048668	collateral sprouting	3/61	33/18112	0.000184544	0.0035286	0.00228251	Bdnf/Spp1/Crabp2	3
BP	GO:1904994	regulation of leukocyte adhesion to vascular endothelial cell	3/61	33/18112	0.000184544	0.0035286	0.00228251	Sele/Selp/Ccr2	3
BP	GO:0050670	regulation of lymphocyte proliferation	6/61	249/18112	0.000187524	0.00355494	0.00229955	Ripk3/Itgal/Ptprc/Il1b/Anxa1/Ccr2	6
BP	GO:0003018	vascular process in circulatory system	6/61	250/18112	0.000191636	0.00358388	0.00231827	Adcyap1/Olr1/Ccl4/Edn1/P2ry2/Cxcr2	6
BP	GO:0032637	interleukin-8 production	4/61	85/18112	0.000192282	0.00358388	0.00231827	Clec7a/Ptprc/Il1b/Anxa1	4
BP	GO:0050727	regulation of inflammatory response	7/61	360/18112	0.000200537	0.00362735	0.00234639	Adcyap1/Tnc/Il1b/Anxa1/Slpi/Ccr2/Fabp4	7
BP	GO:0033627	cell adhesion mediated by integrin	4/61	86/18112	0.000201156	0.00362735	0.00234639	Itga11/Itgal/Itgb3/Itgb7	4
BP	GO:1990868	response to chemokine	4/61	86/18112	0.000201156	0.00362735	0.00234639	Ccl4/Edn1/Ccr2/Cxcr2	4
BP	GO:1990869	cellular response to chemokine	4/61	86/18112	0.000201156	0.00362735	0.00234639	Ccl4/Edn1/Ccr2/Cxcr2	4
BP	GO:0032944	regulation of mononuclear cell proliferation	6/61	253/18112	0.000204402	0.00365617	0.00236503	Ripk3/Itgal/Ptprc/Il1b/Anxa1/Ccr2	6
BP	GO:0071356	cellular response to tumor necrosis factor	6/61	258/18112	0.000227165	0.00403082	0.00260738	Bdnf/Traip/Ccl4/Adamts7/Edn1/Fabp4	6
BP	GO:0050766	positive regulation of phagocytosis	4/61	89/18112	0.000229552	0.00404084	0.00261386	Clec7a/Ptprc/Il1b/Il2rg	4
BP	GO:0050768	negative regulation of neurogenesis	5/61	166/18112	0.000239324	0.00412262	0.00266676	Adcyap1/Bdnf/Spp1/Il1b/Bmp7	5
BP	GO:1905952	regulation of lipid localization	5/61	166/18112	0.000239324	0.00412262	0.00266676	Spp1/Il1b/Edn1/Itgb3/P2ry2	5
BP	GO:0090022	regulation of neutrophil chemotaxis	3/61	36/18112	0.000239773	0.00412262	0.00266676	Il1b/Edn1/Cxcr2	3
BP	GO:0071383	cellular response to steroid hormone stimulus	6/61	261/18112	0.000241754	0.00412469	0.0026681	Adcyap1/Bdnf/Anxa1/Edn1/Ucn2/Bmp7	6
BP	GO:0070665	positive regulation of leukocyte proliferation	5/61	167/18112	0.000246078	0.00416641	0.00269509	Itgal/Ptprc/Il1b/Anxa1/Ccr2	5
BP	GO:1903532	positive regulation of secretion by cell	7/61	373/18112	0.00024898	0.00418362	0.00270622	Adcyap1/Fgr/Spp1/Il1b/Edn1/P2ry2/Kcnn4	7
BP	GO:0051961	negative regulation of nervous system development	5/61	170/18112	0.000267212	0.00445622	0.00288255	Adcyap1/Bdnf/Spp1/Il1b/Bmp7	5
BP	GO:2000191	regulation of fatty acid transport	3/61	38/18112	0.000281941	0.00466676	0.00301874	Il1b/Edn1/P2ry2	3
BP	GO:0070663	regulation of leukocyte proliferation	6/61	271/18112	0.000295794	0.00485979	0.00314361	Ripk3/Itgal/Ptprc/Il1b/Anxa1/Ccr2	6
BP	GO:1902624	positive regulation of neutrophil migration	3/61	39/18112	0.000304706	0.00493312	0.00319104	Il1b/Edn1/Cxcr2	3
BP	GO:2000403	positive regulation of lymphocyte migration	3/61	39/18112	0.000304706	0.00493312	0.00319104	Ccl4/Itgb3/Ccr2	3
BP	GO:0021675	nerve development	4/61	97/18112	0.000319281	0.00513164	0.00331945	Pou4f3/Bdnf/Atp8b1/Edn1	4
BP	GO:0051091	positive regulation of DNA-binding transcription factor activity	6/61	276/18112	0.000326156	0.00520442	0.00336653	Wnt1/Bdnf/Clec7a/Ripk3/Il1b/Edn1	6
BP	GO:1903034	regulation of response to wounding	5/61	178/18112	0.00033034	0.00523353	0.00338536	Clec7a/Spp1/Anxa1/Eppk1/Cd109	5
BP	GO:0002703	regulation of leukocyte mediated immunity	6/61	280/18112	0.000352165	0.00553972	0.00358343	Clec7a/Fgr/Ripk3/Ptprc/Il1b/Ccr2	6
BP	GO:0000302	response to reactive oxygen species	6/61	281/18112	0.000358914	0.00560614	0.00362639	Ripk3/Hk3/Olr1/Il1b/Anxa1/Edn1	6
BP	GO:0002709	regulation of T cell mediated immunity	4/61	101/18112	0.000372484	0.00577741	0.00373718	Ripk3/Ptprc/Il1b/Ccr2	4
BP	GO:0034612	response to tumor necrosis factor	6/61	284/18112	0.000379773	0.00584957	0.00378385	Bdnf/Traip/Ccl4/Adamts7/Edn1/Fabp4	6
BP	GO:0032642	regulation of chemokine production	4/61	102/18112	0.000386717	0.00591544	0.00382646	Adcyap1/Clec7a/Il1b/P2ry2	4
BP	GO:0048588	developmental cell growth	6/61	286/18112	0.000394199	0.00598859	0.00387378	Pou4f3/Bdnf/Ostn/Spp1/Edn1/Crabp2	6
BP	GO:0002367	cytokine production involved in immune response	4/61	103/18112	0.000401335	0.0060146	0.00389061	Clec7a/Trem1/Il1b/Ccr2	4
BP	GO:1905954	positive regulation of lipid localization	4/61	103/18112	0.000401335	0.0060146	0.00389061	Spp1/Il1b/Edn1/P2ry2	4
BP	GO:0050850	positive regulation of calcium-mediated signaling	3/61	43/18112	0.000407543	0.00606664	0.00392427	Clec7a/Ccl4/Itgal	3
BP	GO:0010660	regulation of muscle cell apoptotic process	4/61	105/18112	0.00043175	0.00634357	0.00410341	Adcyap1/Trem1/Edn1/Cxcr2	4
BP	GO:1903531	negative regulation of secretion by cell	5/61	189/18112	0.000434865	0.00634357	0.00410341	Il1b/Anxa1/Edn1/Ucn2/Ccr2	5
BP	GO:0007157	heterophilic cell-cell adhesion via plasma membrane cell adhesion molecules	3/61	44/18112	0.000436317	0.00634357	0.00410341	Sele/Itgal/Selp	3
BP	GO:0002699	positive regulation of immune effector process	6/61	292/18112	0.000440068	0.00634357	0.00410341	Clec7a/Fgr/Ptprc/Il1b/Anxa1/Ccr2	6
BP	GO:0002697	regulation of immune effector process	7/61	410/18112	0.000440446	0.00634357	0.00410341	Clec7a/Fgr/Ripk3/Ptprc/Il1b/Anxa1/Ccr2	7
BP	GO:0002366	leukocyte activation involved in immune response	6/61	297/18112	0.000481392	0.00688857	0.00445594	Clec7a/Fgr/Itgal/Ptprc/Anxa1/Ccr2	6
BP	GO:0003253	cardiac neural crest cell migration involved in outflow tract morphogenesis	2/61	10/18112	0.000493443	0.00701574	0.00453821	Edn1/Bmp7	2
BP	GO:0042554	superoxide anion generation	3/61	46/18112	0.00049771	0.00703134	0.0045483	Clec7a/Olr1/Edn1	3
BP	GO:0030098	lymphocyte differentiation	7/61	420/18112	0.000508544	0.00713893	0.00461789	Wnt1/Ripk3/Ptprc/Il1b/Anxa1/Il2rg/Ccr2	7
BP	GO:0002263	cell activation involved in immune response	6/61	301/18112	0.000516584	0.00720618	0.0046614	Clec7a/Fgr/Itgal/Ptprc/Anxa1/Ccr2	6
BP	GO:0042088	T-helper 1 type immune response	3/61	47/18112	0.000530374	0.00729554	0.0047192	Il1b/Anxa1/Ccr2	3
BP	GO:0002443	leukocyte mediated immunity	7/61	423/18112	0.000530535	0.00729554	0.0047192	Clec7a/Fgr/Ripk3/Trem1/Ptprc/Il1b/Ccr2	7
BP	GO:0010657	muscle cell apoptotic process	4/61	111/18112	0.000532857	0.00729554	0.0047192	Adcyap1/Trem1/Edn1/Cxcr2	4
BP	GO:0051384	response to glucocorticoid	6/61	304/18112	0.00054427	0.00737909	0.00477325	Adcyap1/Il1b/Anxa1/Edn1/Ucn2/Fabp4	6
BP	GO:0051047	positive regulation of secretion	7/61	425/18112	0.000545614	0.00737909	0.00477325	Adcyap1/Fgr/Spp1/Il1b/Edn1/P2ry2/Kcnn4	7
BP	GO:0032760	positive regulation of tumor necrosis factor production	4/61	112/18112	0.000551211	0.00740961	0.00479298	Clec7a/Ccl4/Ptprc/Ccr2	4
BP	GO:2000404	regulation of T cell migration	3/61	48/18112	0.00056438	0.00754094	0.00487794	Ripk3/Itgb3/Ccr2	3
BP	GO:0061448	connective tissue development	6/61	308/18112	0.00058297	0.00767108	0.00496212	Acan/Ccn2/Adamts7/Edn1/Itgb3/Bmp7	6
BP	GO:0046634	regulation of alpha-beta T cell activation	4/61	114/18112	0.00058926	0.00767108	0.00496212	Ptprc/Anxa1/Il2rg/Ccr2	4
BP	GO:1903557	positive regulation of tumor necrosis factor superfamily cytokine production	4/61	114/18112	0.00058926	0.00767108	0.00496212	Clec7a/Ccl4/Ptprc/Ccr2	4
BP	GO:0006968	cellular defense response	2/61	11/18112	0.000601789	0.00767108	0.00496212	Ccr2/Cxcr2	2
BP	GO:0010193	response to ozone	2/61	11/18112	0.000601789	0.00767108	0.00496212	Il1b/Edn1	2
BP	GO:0033029	regulation of neutrophil apoptotic process	2/61	11/18112	0.000601789	0.00767108	0.00496212	Anxa1/Cxcr2	2
BP	GO:0035701	hematopoietic stem cell migration	2/61	11/18112	0.000601789	0.00767108	0.00496212	Ptprc/Ccr2	2
BP	GO:2001280	positive regulation of unsaturated fatty acid biosynthetic process	2/61	11/18112	0.000601789	0.00767108	0.00496212	Il1b/Anxa1	2
BP	GO:0071496	cellular response to external stimulus	7/61	433/18112	0.000609387	0.00772354	0.00499605	Trem1/Cd68/Tnc/Ptprc/Il1b/Ucn2/Itgb3	7
BP	GO:0042542	response to hydrogen peroxide	5/61	204/18112	0.000615464	0.00775625	0.00501721	Ripk3/Hk3/Olr1/Anxa1/Edn1	5
BP	GO:0046942	carboxylic acid transport	6/61	313/18112	0.000634321	0.00794872	0.00514171	Bdnf/Il1b/Atp8b1/Anxa1/Edn1/P2ry2	6
BP	GO:0001776	leukocyte homeostasis	4/61	118/18112	0.000670899	0.0083135	0.00537768	Ripk3/Anxa1/Ccr2/Cxcr2	4
BP	GO:0036230	granulocyte activation	3/61	51/18112	0.000674676	0.0083135	0.00537768	Anxa1/Ccr2/Cxcr2	3
BP	GO:1902622	regulation of neutrophil migration	3/61	51/18112	0.000674676	0.0083135	0.00537768	Il1b/Edn1/Cxcr2	3
BP	GO:0051090	regulation of DNA-binding transcription factor activity	7/61	441/18112	0.000678967	0.00832015	0.00538198	Wnt1/Bdnf/Clec7a/Traip/Ripk3/Il1b/Edn1	7
BP	GO:0044070	regulation of anion transport	4/61	120/18112	0.000714588	0.00868614	0.00561872	Il1b/Atp8b1/Edn1/P2ry2	4
BP	GO:0031392	regulation of prostaglandin biosynthetic process	2/61	12/18112	0.000720582	0.00868614	0.00561872	Il1b/Anxa1	2
BP	GO:0072124	regulation of glomerular mesangial cell proliferation	2/61	12/18112	0.000720582	0.00868614	0.00561872	Itgb3/Bmp7	2
BP	GO:0071385	cellular response to glucocorticoid stimulus	4/61	121/18112	0.000737171	0.00881737	0.00570361	Adcyap1/Anxa1/Edn1/Ucn2	4
BP	GO:0046651	lymphocyte proliferation	6/61	323/18112	0.000747532	0.00881737	0.00570361	Ripk3/Itgal/Ptprc/Il1b/Anxa1/Ccr2	6
BP	GO:0010721	negative regulation of cell development	5/61	213/18112	0.000747897	0.00881737	0.00570361	Adcyap1/Bdnf/Spp1/Il1b/Bmp7	5
BP	GO:0006636	unsaturated fatty acid biosynthetic process	3/61	53/18112	0.000755321	0.00881737	0.00570361	Il1b/Anxa1/Edn1	3
BP	GO:0043277	apoptotic cell clearance	3/61	53/18112	0.000755321	0.00881737	0.00570361	Anxa1/Itgb3/Ccr2	3
BP	GO:0046456	icosanoid biosynthetic process	3/61	53/18112	0.000755321	0.00881737	0.00570361	Il1b/Anxa1/Edn1	3
BP	GO:0046883	regulation of hormone secretion	6/61	325/18112	0.000771942	0.00896423	0.00579861	Adcyap1/Spp1/Il1b/Anxa1/Edn1/Ucn2	6
BP	GO:0032943	mononuclear cell proliferation	6/61	327/18112	0.000796966	0.00907494	0.00587022	Ripk3/Itgal/Ptprc/Il1b/Anxa1/Ccr2	6
BP	GO:0006692	prostanoid metabolic process	3/61	54/18112	0.000797842	0.00907494	0.00587022	Il1b/Anxa1/Edn1	3
BP	GO:0006693	prostaglandin metabolic process	3/61	54/18112	0.000797842	0.00907494	0.00587022	Il1b/Anxa1/Edn1	3
BP	GO:0032892	positive regulation of organic acid transport	3/61	54/18112	0.000797842	0.00907494	0.00587022	Il1b/Edn1/P2ry2	3
BP	GO:0032609	interferon-gamma production	4/61	125/18112	0.000832573	0.00931419	0.00602498	Clec7a/Ripk3/Il1b/Ccr2	4
BP	GO:0032649	regulation of interferon-gamma production	4/61	125/18112	0.000832573	0.00931419	0.00602498	Clec7a/Ripk3/Il1b/Ccr2	4
BP	GO:0002460	adaptive immune response based on somatic recombination of immune receptors built from immunoglobulin superfamily domains	6/61	330/18112	0.000835673	0.00931419	0.00602498	Clec7a/Ripk3/Ptprc/Il1b/Anxa1/Ccr2	6
BP	GO:0070372	regulation of ERK1 and ERK2 cascade	6/61	330/18112	0.000835673	0.00931419	0.00602498	Adcyap1/Ccn2/Ccl4/Ptprc/Il1b/Itgb3	6
BP	GO:0061309	cardiac neural crest cell development involved in outflow tract morphogenesis	2/61	13/18112	0.000849751	0.00937686	0.00606552	Edn1/Bmp7	2
BP	GO:0072110	glomerular mesangial cell proliferation	2/61	13/18112	0.000849751	0.00937686	0.00606552	Itgb3/Bmp7	2
BP	GO:0051048	negative regulation of secretion	5/61	220/18112	0.000864815	0.00949584	0.00614249	Il1b/Anxa1/Edn1/Ucn2/Ccr2	5
BP	GO:0002440	production of molecular mediator of immune response	5/61	225/18112	0.00095632	0.0104232	0.00674235	Clec7a/Trem1/Ptprc/Il1b/Ccr2	5
BP	GO:0002456	T cell mediated immunity	4/61	130/18112	0.000963697	0.0104232	0.00674235	Ripk3/Ptprc/Il1b/Ccr2	4
BP	GO:1903793	positive regulation of anion transport	3/61	58/18112	0.000983066	0.0104232	0.00674235	Il1b/Edn1/P2ry2	3
BP	GO:0001781	neutrophil apoptotic process	2/61	14/18112	0.000989229	0.0104232	0.00674235	Anxa1/Cxcr2	2
BP	GO:0002829	negative regulation of type 2 immune response	2/61	14/18112	0.000989229	0.0104232	0.00674235	Anxa1/Ccr2	2
BP	GO:0048672	positive regulation of collateral sprouting	2/61	14/18112	0.000989229	0.0104232	0.00674235	Bdnf/Crabp2	2
BP	GO:2001279	regulation of unsaturated fatty acid biosynthetic process	2/61	14/18112	0.000989229	0.0104232	0.00674235	Il1b/Anxa1	2
BP	GO:0030282	bone mineralization	4/61	131/18112	0.000991566	0.0104232	0.00674235	Kl/Fgr/Spp1/Bmp7	4
BP	GO:0071384	cellular response to corticosteroid stimulus	4/61	131/18112	0.000991566	0.0104232	0.00674235	Adcyap1/Anxa1/Edn1/Ucn2	4
BP	GO:1903131	mononuclear cell differentiation	7/61	472/18112	0.00101051	0.0105722	0.00683877	Wnt1/Ripk3/Ptprc/Il1b/Anxa1/Il2rg/Ccr2	7
BP	GO:0008361	regulation of cell size	5/61	230/18112	0.00105485	0.0109843	0.00710533	Bdnf/Spp1/Edn1/Kcnn4/Crabp2	5
BP	GO:0009612	response to mechanical stimulus	6/61	346/18112	0.00106731	0.0110621	0.00715566	Bdnf/Acan/Tnc/Il1b/Edn1/Itgb3	6
BP	GO:0002548	monocyte chemotaxis	3/61	60/18112	0.00108505	0.0111418	0.0072072	Ccl4/Anxa1/Ccr2	3
BP	GO:0051353	positive regulation of oxidoreductase activity	3/61	60/18112	0.00108505	0.0111418	0.0072072	Ripk3/Il1b/Edn1	3
BP	GO:0061041	regulation of wound healing	4/61	135/18112	0.00110873	0.0113326	0.00733061	Clec7a/Anxa1/Eppk1/Cd109	4
BP	GO:0010839	negative regulation of keratinocyte proliferation	2/61	15/18112	0.00113895	0.0115351	0.00746159	Eppk1/Cd109	2
BP	GO:0034116	positive regulation of heterotypic cell-cell adhesion	2/61	15/18112	0.00113895	0.0115351	0.00746159	Il1b/Bmp7	2
BP	GO:0032874	positive regulation of stress-activated MAPK cascade	4/61	137/18112	0.00117082	0.011804	0.00763554	Ccn2/Clec7a/Il1b/Ccr2	4
BP	GO:0070661	leukocyte proliferation	6/61	353/18112	0.00118296	0.0118724	0.00767979	Ripk3/Itgal/Ptprc/Il1b/Anxa1/Ccr2	6
BP	GO:0030850	prostate gland development	3/61	62/18112	0.00119348	0.0119095	0.00770376	Tnc/Anxa1/Bmp7	3
BP	GO:0002824	positive regulation of adaptive immune response based on somatic recombination of immune receptors built from immunoglobulin superfamily domains	4/61	138/18112	0.00120276	0.0119095	0.00770376	Clec7a/Ptprc/Il1b/Ccr2	4
BP	GO:0070301	cellular response to hydrogen peroxide	4/61	138/18112	0.00120276	0.0119095	0.00770376	Ripk3/Hk3/Anxa1/Edn1	4
BP	GO:0070304	positive regulation of stress-activated protein kinase signaling cascade	4/61	139/18112	0.0012353	0.0121774	0.00787706	Ccn2/Clec7a/Il1b/Ccr2	4
BP	GO:0001821	histamine secretion	2/61	16/18112	0.00129883	0.01258	0.00813749	Adcyap1/Edn1	2
BP	GO:0061308	cardiac neural crest cell development involved in heart development	2/61	16/18112	0.00129883	0.01258	0.00813749	Edn1/Bmp7	2
BP	GO:0071639	positive regulation of monocyte chemotactic protein-1 production	2/61	16/18112	0.00129883	0.01258	0.00813749	Clec7a/Il1b	2
BP	GO:1901722	regulation of cell proliferation involved in kidney development	2/61	16/18112	0.00129883	0.01258	0.00813749	Itgb3/Bmp7	2
BP	GO:0002821	positive regulation of adaptive immune response	4/61	142/18112	0.00133664	0.0128899	0.00833795	Clec7a/Ptprc/Il1b/Ccr2	4
BP	GO:0033674	positive regulation of kinase activity	7/61	496/18112	0.0013459	0.012923	0.00835939	Adcyap1/Fgr/Ripk3/Ptprc/Il1b/Edn1/Itgb3	7
BP	GO:0072593	reactive oxygen species metabolic process	5/61	246/18112	0.00142127	0.0135879	0.00878945	Ccn2/Clec7a/Ripk3/Olr1/Edn1	5
BP	GO:0014823	response to activity	4/61	145/18112	0.00144366	0.0137149	0.00887163	Bdnf/Kl/Edn1/Itgb3	4
BP	GO:0001763	morphogenesis of a branching structure	5/61	247/18112	0.00144693	0.0137149	0.00887163	Wnt1/Tnc/Il1b/Edn1/Bmp7	5
BP	GO:0061307	cardiac neural crest cell differentiation involved in heart development	2/61	17/18112	0.00146882	0.0138632	0.00896756	Edn1/Bmp7	2
BP	GO:0001822	kidney development	6/61	373/18112	0.00156687	0.0147259	0.00952563	Wnt1/Bdnf/Spp1/Itgb3/Cxcr2/Bmp7	6
BP	GO:0010623	programmed cell death involved in cell development	2/61	18/18112	0.00164885	0.0153019	0.00989819	Bdnf/Il1b	2
BP	GO:0070486	leukocyte aggregation	2/61	18/18112	0.00164885	0.0153019	0.00989819	Il1b/Bmp7	2
BP	GO:0072109	glomerular mesangium development	2/61	18/18112	0.00164885	0.0153019	0.00989819	Itgb3/Bmp7	2
BP	GO:0006801	superoxide metabolic process	3/61	70/18112	0.00169475	0.0156623	0.0101313	Clec7a/Olr1/Edn1	3
BP	GO:0071677	positive regulation of mononuclear cell migration	3/61	71/18112	0.0017653	0.0162466	0.0105093	Ccl4/Itgb3/Ccr2	3
BP	GO:0002827	positive regulation of T-helper 1 type immune response	2/61	19/18112	0.00183885	0.0165135	0.0106819	Il1b/Ccr2	2
BP	GO:0051608	histamine transport	2/61	19/18112	0.00183885	0.0165135	0.0106819	Adcyap1/Edn1	2
BP	GO:0060973	cell migration involved in heart development	2/61	19/18112	0.00183885	0.0165135	0.0106819	Edn1/Bmp7	2
BP	GO:0070365	hepatocyte differentiation	2/61	19/18112	0.00183885	0.0165135	0.0106819	Wnt1/Anxa1	2
BP	GO:0140131	positive regulation of lymphocyte chemotaxis	2/61	19/18112	0.00183885	0.0165135	0.0106819	Ccl4/Ccr2	2
BP	GO:0015711	organic anion transport	6/61	385/18112	0.00183897	0.0165135	0.0106819	Bdnf/Il1b/Atp8b1/Anxa1/Edn1/P2ry2	6
BP	GO:0072001	renal system development	6/61	387/18112	0.00188761	0.0168819	0.0109203	Wnt1/Bdnf/Spp1/Itgb3/Cxcr2/Bmp7	6
BP	GO:0046879	hormone secretion	6/61	389/18112	0.00193722	0.017256	0.0111622	Adcyap1/Spp1/Il1b/Anxa1/Edn1/Ucn2	6
BP	GO:0042476	odontogenesis	4/61	158/18112	0.00197707	0.0175406	0.0113463	Fmod/Tnc/Edn1/Bmp7	4
BP	GO:0019233	sensory perception of pain	4/61	161/18112	0.00211718	0.0186346	0.012054	Adcyap1/Edn1/P2ry2/Ccr2	4
BP	GO:0072073	kidney epithelium development	4/61	161/18112	0.00211718	0.0186346	0.012054	Wnt1/Bdnf/Cxcr2/Bmp7	4
BP	GO:0009914	hormone transport	6/61	400/18112	0.00222801	0.0195325	0.0126348	Adcyap1/Spp1/Il1b/Anxa1/Edn1/Ucn2	6
BP	GO:0043583	ear development	5/61	273/18112	0.00224171	0.0195573	0.0126509	Wnt1/Pou4f3/Bdnf/Atp8b1/Edn1	5
BP	GO:0035584	calcium-mediated signaling using intracellular calcium source	2/61	21/18112	0.00224847	0.0195573	0.0126509	Ptprc/Selp	2
BP	GO:0045580	regulation of T cell differentiation	4/61	165/18112	0.00231448	0.0200528	0.0129714	Ptprc/Anxa1/Il2rg/Ccr2	4
BP	GO:0048638	regulation of developmental growth	6/61	404/18112	0.00234155	0.0202084	0.013072	Bdnf/Ostn/Spp1/Edn1/Eppk1/Crabp2	6
BP	GO:0007249	I-kappaB kinase/NF-kappaB signaling	5/61	278/18112	0.00242508	0.0208482	0.0134859	Clec7a/Ripk3/Il1b/S100a4/Edn1	5
BP	GO:0043117	positive regulation of vascular permeability	2/61	22/18112	0.00246797	0.0210537	0.0136188	Ccl4/Cxcr2	2
BP	GO:0072111	cell proliferation involved in kidney development	2/61	22/18112	0.00246797	0.0210537	0.0136188	Itgb3/Bmp7	2
BP	GO:0032535	regulation of cellular component size	6/61	410/18112	0.00252	0.0214152	0.0138527	Lmod1/Bdnf/Spp1/Edn1/Kcnn4/Crabp2	6
BP	GO:0045860	positive regulation of protein kinase activity	6/61	414/18112	0.00264455	0.0222392	0.0143856	Adcyap1/Ripk3/Ptprc/Il1b/Edn1/Itgb3	6
BP	GO:0002250	adaptive immune response	6/61	415/18112	0.0026764	0.0222392	0.0143856	Clec7a/Ripk3/Ptprc/Il1b/Anxa1/Ccr2	6
BP	GO:0001502	cartilage condensation	2/61	23/18112	0.00269717	0.0222392	0.0143856	Acan/Ccn2	2
BP	GO:0002922	positive regulation of humoral immune response	2/61	23/18112	0.00269717	0.0222392	0.0143856	Ptprc/Il1b	2
BP	GO:0010666	positive regulation of cardiac muscle cell apoptotic process	2/61	23/18112	0.00269717	0.0222392	0.0143856	Trem1/Cxcr2	2
BP	GO:0050857	positive regulation of antigen receptor-mediated signaling pathway	2/61	23/18112	0.00269717	0.0222392	0.0143856	Ptprc/Kcnn4	2
BP	GO:0071605	monocyte chemotactic protein-1 production	2/61	23/18112	0.00269717	0.0222392	0.0143856	Clec7a/Il1b	2
BP	GO:0071637	regulation of monocyte chemotactic protein-1 production	2/61	23/18112	0.00269717	0.0222392	0.0143856	Clec7a/Il1b	2
BP	GO:2000379	positive regulation of reactive oxygen species metabolic process	3/61	84/18112	0.00285317	0.0234383	0.0151613	Clec7a/Ripk3/Olr1	3
BP	GO:0050878	regulation of body fluid levels	6/61	421/18112	0.0028736	0.023519	0.0152135	Prss56/Edn1/Selp/Itgb3/P2ry2/Kcnn4	6
BP	GO:0010663	positive regulation of striated muscle cell apoptotic process	2/61	24/18112	0.00293601	0.0238538	0.0154301	Trem1/Cxcr2	2
BP	GO:0010829	negative regulation of glucose transmembrane transport	2/61	24/18112	0.00293601	0.0238538	0.0154301	Ostn/Il1b	2
BP	GO:0002700	regulation of production of molecular mediator of immune response	4/61	177/18112	0.00298195	0.0240508	0.0155575	Clec7a/Ptprc/Il1b/Ccr2	4
BP	GO:0031214	biomineral tissue development	4/61	177/18112	0.00298195	0.0240508	0.0155575	Kl/Fgr/Spp1/Bmp7	4
BP	GO:0032729	positive regulation of interferon-gamma production	3/61	86/18112	0.00304989	0.0245097	0.0158543	Clec7a/Il1b/Ccr2	3
BP	GO:0046631	alpha-beta T cell activation	4/61	180/18112	0.00316737	0.0253156	0.0163757	Ptprc/Anxa1/Il2rg/Ccr2	4
BP	GO:0032930	positive regulation of superoxide anion generation	2/61	25/18112	0.00318442	0.0253156	0.0163757	Clec7a/Olr1	2
BP	GO:1901623	regulation of lymphocyte chemotaxis	2/61	25/18112	0.00318442	0.0253156	0.0163757	Ccl4/Ccr2	2
BP	GO:0050848	regulation of calcium-mediated signaling	3/61	88/18112	0.00325477	0.0255556	0.0165309	Clec7a/Ccl4/Itgal	3
BP	GO:0060541	respiratory system development	5/61	298/18112	0.00326924	0.0255556	0.0165309	Adamts2/Ccn2/Tnc/Hydin/Slfn4	5
BP	GO:0009755	hormone-mediated signaling pathway	4/61	182/18112	0.00329527	0.0255556	0.0165309	Bdnf/Ostn/Ucn2/Bmp7	4
BP	GO:0032640	tumor necrosis factor production	4/61	182/18112	0.00329527	0.0255556	0.0165309	Clec7a/Ccl4/Ptprc/Ccr2	4
BP	GO:0032680	regulation of tumor necrosis factor production	4/61	182/18112	0.00329527	0.0255556	0.0165309	Clec7a/Ccl4/Ptprc/Ccr2	4
BP	GO:0050777	negative regulation of immune response	4/61	182/18112	0.00329527	0.0255556	0.0165309	Adcyap1/Ptprc/Anxa1/Ccr2	4
BP	GO:0110148	biomineralization	4/61	182/18112	0.00329527	0.0255556	0.0165309	Kl/Fgr/Spp1/Bmp7	4
BP	GO:0034114	regulation of heterotypic cell-cell adhesion	2/61	26/18112	0.00344234	0.0265108	0.0171488	Il1b/Bmp7	2
BP	GO:0045723	positive regulation of fatty acid biosynthetic process	2/61	26/18112	0.00344234	0.0265108	0.0171488	Il1b/Anxa1	2
BP	GO:0071706	tumor necrosis factor superfamily cytokine production	4/61	185/18112	0.00349367	0.0267205	0.0172845	Clec7a/Ccl4/Ptprc/Ccr2	4
BP	GO:1903555	regulation of tumor necrosis factor superfamily cytokine production	4/61	185/18112	0.00349367	0.0267205	0.0172845	Clec7a/Ccl4/Ptprc/Ccr2	4
BP	GO:0032890	regulation of organic acid transport	3/61	91/18112	0.00357761	0.0272685	0.0176389	Il1b/Edn1/P2ry2	3
BP	GO:0031668	cellular response to extracellular stimulus	5/61	305/18112	0.00360942	0.0272954	0.0176563	Trem1/Cd68/Tnc/Ptprc/Ucn2	5
BP	GO:0002683	negative regulation of immune system process	6/61	441/18112	0.0036105	0.0272954	0.0176563	Adcyap1/Fgr/Cd68/Ptprc/Anxa1/Ccr2	6
BP	GO:0035296	regulation of tube diameter	4/61	187/18112	0.00363036	0.0272954	0.0176563	Adcyap1/Olr1/Edn1/P2ry2	4
BP	GO:0097746	blood vessel diameter maintenance	4/61	187/18112	0.00363036	0.0272954	0.0176563	Adcyap1/Olr1/Edn1/P2ry2	4
BP	GO:1903035	negative regulation of response to wounding	3/61	92/18112	0.00368942	0.0276111	0.0178605	Spp1/Eppk1/Cd109	3
BP	GO:0035150	regulation of tube size	4/61	188/18112	0.00370006	0.0276111	0.0178605	Adcyap1/Olr1/Edn1/P2ry2	4
BP	GO:0098743	cell aggregation	2/61	27/18112	0.0037097	0.0276111	0.0178605	Acan/Ccn2	2
BP	GO:0010827	regulation of glucose transmembrane transport	3/61	93/18112	0.00380334	0.0282134	0.0182501	Ostn/Il1b/Edn1	3
BP	GO:0048754	branching morphogenesis of an epithelial tube	4/61	190/18112	0.00384217	0.0284064	0.018375	Wnt1/Tnc/Edn1/Bmp7	4
BP	GO:0001659	temperature homeostasis	4/61	191/18112	0.00391459	0.0287855	0.0186202	Adcyap1/Il1b/Ccr2/Fabp4	4
BP	GO:0048864	stem cell development	3/61	94/18112	0.00391939	0.0287855	0.0186202	Ptprc/Edn1/Bmp7	3
BP	GO:0006925	inflammatory cell apoptotic process	2/61	28/18112	0.00398643	0.0289898	0.0187524	Anxa1/Cxcr2	2
BP	GO:0045780	positive regulation of bone resorption	2/61	28/18112	0.00398643	0.0289898	0.0187524	Spp1/Itgb3	2
BP	GO:2000178	negative regulation of neural precursor cell proliferation	2/61	28/18112	0.00398643	0.0289898	0.0187524	Bdnf/Il1b	2
BP	GO:0034614	cellular response to reactive oxygen species	4/61	193/18112	0.00406221	0.0294157	0.0190279	Ripk3/Hk3/Anxa1/Edn1	4
BP	GO:0001558	regulation of cell growth	6/61	452/18112	0.00407151	0.0294157	0.0190279	Bdnf/Ostn/Spp1/Tnc/Edn1/Crabp2	6
BP	GO:0031346	positive regulation of cell projection organization	6/61	453/18112	0.00411549	0.0296369	0.0191709	Wnt1/Adcyap1/Bdnf/P2ry2/Crabp2/Bmp7	6
BP	GO:0042490	mechanoreceptor differentiation	3/61	96/18112	0.00415793	0.0298456	0.0193059	Pou4f3/Bdnf/Atp8b1	3
BP	GO:0032928	regulation of superoxide anion generation	2/61	29/18112	0.00427248	0.0305327	0.0197504	Clec7a/Olr1	2
BP	GO:0006816	calcium ion transport	6/61	457/18112	0.00429495	0.0305327	0.0197504	Ccn2/Ccl4/Ptprc/Edn1/Itgb3/Kcnn4	6
BP	GO:0050767	regulation of neurogenesis	6/61	457/18112	0.00429495	0.0305327	0.0197504	Adcyap1/Bdnf/Spp1/Il1b/Crabp2/Bmp7	6
BP	GO:0001667	ameboidal-type cell migration	6/61	458/18112	0.00434071	0.0307594	0.0198971	Anxa1/Edn1/Eppk1/Itgb3/Itgb7/Bmp7	6
BP	GO:0061351	neural precursor cell proliferation	4/61	197/18112	0.00436869	0.0307611	0.0198982	Wnt1/Adcyap1/Bdnf/Il1b	4
BP	GO:0072330	monocarboxylic acid biosynthetic process	4/61	197/18112	0.00436869	0.0307611	0.0198982	Il1b/Anxa1/Edn1/Crabp2	4
BP	GO:0045619	regulation of lymphocyte differentiation	4/61	199/18112	0.00452764	0.0315618	0.0204161	Ptprc/Anxa1/Il2rg/Ccr2	4
BP	GO:0042246	tissue regeneration	3/61	99/18112	0.004532	0.0315618	0.0204161	Anxa1/Ucn2/Eppk1	3
BP	GO:0046888	negative regulation of hormone secretion	3/61	99/18112	0.004532	0.0315618	0.0204161	Il1b/Edn1/Ucn2	3
BP	GO:0046641	positive regulation of alpha-beta T cell proliferation	2/61	30/18112	0.00456778	0.0315618	0.0204161	Ptprc/Ccr2	2
BP	GO:0060037	pharyngeal system development	2/61	30/18112	0.00456778	0.0315618	0.0204161	Edn1/Bmp7	2
BP	GO:0072012	glomerulus vasculature development	2/61	30/18112	0.00456778	0.0315618	0.0204161	Itgb3/Bmp7	2
BP	GO:0043405	regulation of MAP kinase activity	4/61	200/18112	0.00460856	0.0317125	0.0205135	Ptprc/Il1b/Edn1/Bmp7	4
BP	GO:0002718	regulation of cytokine production involved in immune response	3/61	100/18112	0.00466107	0.0317125	0.0205135	Clec7a/Il1b/Ccr2	3
BP	GO:0007200	phospholipase C-activating G protein-coupled receptor signaling pathway	3/61	100/18112	0.00466107	0.0317125	0.0205135	Edn1/P2ry2/Cxcr2	3
BP	GO:0070542	response to fatty acid	3/61	100/18112	0.00466107	0.0317125	0.0205135	Ccn2/Il1b/Edn1	3
BP	GO:0120162	positive regulation of cold-induced thermogenesis	3/61	100/18112	0.00466107	0.0317125	0.0205135	Adcyap1/Ccr2/Fabp4	3
BP	GO:0090596	sensory organ morphogenesis	5/61	325/18112	0.00472138	0.0320246	0.0207154	Wnt1/Pou4f3/Bdnf/Edn1/Bmp7	5
BP	GO:0045582	positive regulation of T cell differentiation	3/61	101/18112	0.00479236	0.0324068	0.0209627	Ptprc/Anxa1/Il2rg	3
BP	GO:0006929	substrate-dependent cell migration	2/61	31/18112	0.00487226	0.0326485	0.0211191	Itga11/Ptprc	2
BP	GO:0035821	modulation of process of another organism	2/61	31/18112	0.00487226	0.0326485	0.0211191	Clec7a/Slpi	2
BP	GO:0043372	positive regulation of CD4-positive, alpha-beta T cell differentiation	2/61	31/18112	0.00487226	0.0326485	0.0211191	Anxa1/Il2rg	2
BP	GO:0051341	regulation of oxidoreductase activity	3/61	102/18112	0.00492586	0.0329083	0.0212871	Ripk3/Il1b/Edn1	3
BP	GO:0036293	response to decreased oxygen levels	6/61	473/18112	0.00507136	0.0337309	0.0218192	Bdnf/Ccn2/Il1b/Edn1/Ucn2/Ccr2	6
BP	GO:0032872	regulation of stress-activated MAPK cascade	4/61	206/18112	0.00511464	0.0337309	0.0218192	Ccn2/Clec7a/Il1b/Ccr2	4
BP	GO:0002544	chronic inflammatory response	2/61	32/18112	0.00518586	0.0337309	0.0218192	Bdnf/Il1b	2
BP	GO:0002828	regulation of type 2 immune response	2/61	32/18112	0.00518586	0.0337309	0.0218192	Anxa1/Ccr2	2
BP	GO:0061437	renal system vasculature development	2/61	32/18112	0.00518586	0.0337309	0.0218192	Itgb3/Bmp7	2
BP	GO:0061440	kidney vasculature development	2/61	32/18112	0.00518586	0.0337309	0.0218192	Itgb3/Bmp7	2
BP	GO:0071305	cellular response to vitamin D	2/61	32/18112	0.00518586	0.0337309	0.0218192	Trem1/Tnc	2
BP	GO:1900745	positive regulation of p38MAPK cascade	2/61	32/18112	0.00518586	0.0337309	0.0218192	Il1b/Ccr2	2
BP	GO:2000406	positive regulation of T cell migration	2/61	32/18112	0.00518586	0.0337309	0.0218192	Itgb3/Ccr2	2
BP	GO:0043270	positive regulation of ion transport	5/61	334/18112	0.00529393	0.0343331	0.0222088	Ccl4/Il1b/Edn1/P2ry2/Ccr2	5
BP	GO:0002706	regulation of lymphocyte mediated immunity	4/61	209/18112	0.00538115	0.0346959	0.0224434	Ripk3/Ptprc/Il1b/Ccr2	4
BP	GO:0070302	regulation of stress-activated protein kinase signaling cascade	4/61	209/18112	0.00538115	0.0346959	0.0224434	Ccn2/Clec7a/Il1b/Ccr2	4
BP	GO:0034599	cellular response to oxidative stress	5/61	336/18112	0.00542757	0.0348937	0.0225714	Wnt1/Ripk3/Hk3/Anxa1/Edn1	5
BP	GO:0006469	negative regulation of protein kinase activity	4/61	210/18112	0.00547201	0.0349767	0.0226251	Ptprc/Il1b/Fabp4/Bmp7	4
BP	GO:1990138	neuron projection extension	4/61	210/18112	0.00547201	0.0349767	0.0226251	Pou4f3/Bdnf/Ostn/Edn1	4
BP	GO:0060740	prostate gland epithelium morphogenesis	2/61	33/18112	0.00550853	0.035109	0.0227106	Tnc/Bmp7	2
BP	GO:0010574	regulation of vascular endothelial growth factor production	2/61	34/18112	0.00584019	0.0371162	0.024009	Il1b/Ccr2	2
BP	GO:0032755	positive regulation of interleukin-6 production	3/61	109/18112	0.00592345	0.0375377	0.0242817	Adcyap1/Clec7a/Il1b	3
BP	GO:0001657	ureteric bud development	3/61	110/18112	0.00607509	0.03828	0.0247618	Wnt1/Bdnf/Bmp7	3
BP	GO:0007088	regulation of mitotic nuclear division	3/61	110/18112	0.00607509	0.03828	0.0247618	Il1b/Edn1/Bmp7	3
BP	GO:0010837	regulation of keratinocyte proliferation	2/61	35/18112	0.00618079	0.0385922	0.0249638	Eppk1/Cd109	2
BP	GO:0060512	prostate gland morphogenesis	2/61	35/18112	0.00618079	0.0385922	0.0249638	Tnc/Bmp7	2
BP	GO:0007409	axonogenesis	6/61	493/18112	0.00618196	0.0385922	0.0249638	Pou4f3/Bdnf/Spp1/Edn1/Crabp2/Bmp7	6
BP	GO:0072163	mesonephric epithelium development	3/61	111/18112	0.00622904	0.0385922	0.0249638	Wnt1/Bdnf/Bmp7	3
BP	GO:0072164	mesonephric tubule development	3/61	111/18112	0.00622904	0.0385922	0.0249638	Wnt1/Bdnf/Bmp7	3
BP	GO:2000106	regulation of leukocyte apoptotic process	3/61	111/18112	0.00622904	0.0385922	0.0249638	Ripk3/Anxa1/Cxcr2	3
BP	GO:0050886	endocrine process	3/61	112/18112	0.00638531	0.0394502	0.0255188	Il1b/Edn1/Ucn2	3
BP	GO:0002369	T cell cytokine production	2/61	36/18112	0.00653026	0.0397429	0.0257081	Il1b/Ccr2	2
BP	GO:0002724	regulation of T cell cytokine production	2/61	36/18112	0.00653026	0.0397429	0.0257081	Il1b/Ccr2	2
BP	GO:0014047	glutamate secretion	2/61	36/18112	0.00653026	0.0397429	0.0257081	Bdnf/Il1b	2
BP	GO:0033032	regulation of myeloid cell apoptotic process	2/61	36/18112	0.00653026	0.0397429	0.0257081	Anxa1/Cxcr2	2
BP	GO:0090322	regulation of superoxide metabolic process	2/61	36/18112	0.00653026	0.0397429	0.0257081	Clec7a/Olr1	2
BP	GO:0051216	cartilage development	4/61	221/18112	0.00654019	0.0397429	0.0257081	Acan/Ccn2/Adamts7/Edn1	4
BP	GO:0071466	cellular response to xenobiotic stimulus	4/61	222/18112	0.00664367	0.0402614	0.0260435	Ccl4/Il1b/Edn1/Itgb3	4
BP	GO:0071216	cellular response to biotic stimulus	5/61	354/18112	0.00674003	0.040734	0.0263492	Clec7a/Trem1/Cd68/Il1b/P2ry2	5
BP	GO:0001823	mesonephros development	3/61	115/18112	0.00686813	0.0411311	0.0266061	Wnt1/Bdnf/Bmp7	3
BP	GO:0010922	positive regulation of phosphatase activity	2/61	37/18112	0.00688855	0.0411311	0.0266061	Ripk3/Ptprc	2
BP	GO:0042092	type 2 immune response	2/61	37/18112	0.00688855	0.0411311	0.0266061	Anxa1/Ccr2	2
BP	GO:0045920	negative regulation of exocytosis	2/61	37/18112	0.00688855	0.0411311	0.0266061	Anxa1/Ccr2	2
BP	GO:0001933	negative regulation of protein phosphorylation	5/61	356/18112	0.00689846	0.0411311	0.0266061	Ptprc/Il1b/Fabp4/Bmp7/Cd109	5
BP	GO:0060249	anatomical structure homeostasis	5/61	358/18112	0.00705948	0.0419784	0.0271542	Ccn2/Spp1/Itgb3/P2ry2/Ccr2	5
BP	GO:0045621	positive regulation of lymphocyte differentiation	3/61	117/18112	0.00720176	0.042596	0.0275537	Ptprc/Anxa1/Il2rg	3
BP	GO:2000177	regulation of neural precursor cell proliferation	3/61	117/18112	0.00720176	0.042596	0.0275537	Adcyap1/Bdnf/Il1b	3
BP	GO:0010573	vascular endothelial growth factor production	2/61	38/18112	0.00725558	0.042648	0.0275873	Il1b/Ccr2	2
BP	GO:2000516	positive regulation of CD4-positive, alpha-beta T cell activation	2/61	38/18112	0.00725558	0.042648	0.0275873	Anxa1/Il2rg	2
BP	GO:0010976	positive regulation of neuron projection development	4/61	228/18112	0.00728746	0.042648	0.0275873	Adcyap1/Bdnf/P2ry2/Bmp7	4
BP	GO:0061138	morphogenesis of a branching epithelium	4/61	228/18112	0.00728746	0.042648	0.0275873	Wnt1/Tnc/Edn1/Bmp7	4
BP	GO:0001649	osteoblast differentiation	4/61	229/18112	0.00739862	0.0430712	0.0278611	Ostn/Spp1/Ifitm1/Bmp7	4
BP	GO:0001906	cell killing	4/61	229/18112	0.00739862	0.0430712	0.0278611	Clec7a/Ripk3/Trem1/Ptprc	4
BP	GO:0002438	acute inflammatory response to antigenic stimulus	2/61	39/18112	0.0076313	0.0440787	0.0285128	Adcyap1/Cxcr2	2
BP	GO:0010259	multicellular organism aging	2/61	39/18112	0.0076313	0.0440787	0.0285128	Acan/Edn1	2
BP	GO:0034694	response to prostaglandin	2/61	39/18112	0.0076313	0.0440787	0.0285128	Tnc/Edn1	2
BP	GO:0033673	negative regulation of kinase activity	4/61	233/18112	0.00785448	0.04525	0.0292704	Ptprc/Il1b/Fabp4/Bmp7	4
BP	GO:0002062	chondrocyte differentiation	3/61	121/18112	0.00789755	0.045263	0.0292788	Acan/Ccn2/Adamts7	3
BP	GO:0002444	myeloid leukocyte mediated immunity	3/61	121/18112	0.00789755	0.045263	0.0292788	Fgr/Trem1/Ccr2	3
BP	GO:0010661	positive regulation of muscle cell apoptotic process	2/61	40/18112	0.00801566	0.0458215	0.0296401	Trem1/Cxcr2	2
BP	GO:0007188	adenylate cyclase-modulating G protein-coupled receptor signaling pathway	4/61	236/18112	0.00820828	0.046802	0.0302744	Adcyap1/Edn1/Ucn2/Itgb3	4
BP	GO:0038061	NIK/NF-kappaB signaling	3/61	123/18112	0.00825982	0.0469751	0.0303863	Ripk3/Il1b/Edn1	3
BP	GO:0010810	regulation of cell-substrate adhesion	4/61	237/18112	0.00832851	0.0472446	0.0305607	Wnt1/Spp1/Trem1/Itgb3	4
BP	GO:0033028	myeloid cell apoptotic process	2/61	41/18112	0.00840858	0.0475771	0.0307757	Anxa1/Cxcr2	2
BP	GO:0002698	negative regulation of immune effector process	3/61	128/18112	0.00920791	0.0516406	0.0334043	Ptprc/Anxa1/Ccr2	3
BP	GO:0043406	positive regulation of MAP kinase activity	3/61	128/18112	0.00920791	0.0516406	0.0334043	Ptprc/Il1b/Edn1	3
BP	GO:0051968	positive regulation of synaptic transmission, glutamatergic	2/61	43/18112	0.00921988	0.0516406	0.0334043	Adcyap1/Ccr2	2
BP	GO:0097484	dendrite extension	2/61	43/18112	0.00921988	0.0516406	0.0334043	Bdnf/Ostn	2
BP	GO:0048839	inner ear development	4/61	245/18112	0.00933218	0.052138	0.033726	Wnt1/Pou4f3/Bdnf/Atp8b1	4
BP	GO:0010720	positive regulation of cell development	5/61	384/18112	0.0093993	0.0521499	0.0337337	Bdnf/Clec7a/Il1b/Itgb3/Crabp2	5
BP	GO:0002702	positive regulation of production of molecular mediator of immune response	3/61	129/18112	0.00940485	0.0521499	0.0337337	Clec7a/Ptprc/Il1b	3
BP	GO:0014812	muscle cell migration	3/61	129/18112	0.00940485	0.0521499	0.0337337	Anxa1/Itgb3/P2ry2	3
BP	GO:0098742	cell-cell adhesion via plasma-membrane adhesion molecules	4/61	246/18112	0.00946294	0.0523411	0.0338574	Sele/Itgal/Dsg1/Selp	4
BP	GO:1904659	glucose transmembrane transport	3/61	130/18112	0.00960425	0.0529144	0.0342282	Ostn/Il1b/Edn1	3
BP	GO:0042119	neutrophil activation	2/61	44/18112	0.00963814	0.0529144	0.0342282	Anxa1/Cxcr2	2
BP	GO:0060251	regulation of glial cell proliferation	2/61	44/18112	0.00963814	0.0529144	0.0342282	Adcyap1/Il1b	2
BP	GO:0008645	hexose transmembrane transport	3/61	131/18112	0.00980611	0.0535713	0.0346532	Ostn/Il1b/Edn1	3
BP	GO:0071774	response to fibroblast growth factor	3/61	131/18112	0.00980611	0.0535713	0.0346532	Kl/Ccn2/Tnc	3
BP	GO:0006959	humoral immune response	4/61	249/18112	0.00986238	0.0536146	0.0346812	Ptprc/Il1b/Slpi/Ccr2	4
BP	GO:0051403	stress-activated MAPK cascade	4/61	249/18112	0.00986238	0.0536146	0.0346812	Ccn2/Clec7a/Il1b/Ccr2	4
BP	GO:0007411	axon guidance	4/61	250/18112	0.00999793	0.0540223	0.0349449	Pou4f3/Bdnf/Edn1/Bmp7	4
BP	GO:0071375	cellular response to peptide hormone stimulus	5/61	390/18112	0.0100071	0.0540223	0.0349449	Wnt1/Kl/Il1b/Edn1/Itgb3	5
BP	GO:0031341	regulation of cell killing	3/61	132/18112	0.0100104	0.0540223	0.0349449	Clec7a/Ripk3/Ptprc	3
BP	GO:0045823	positive regulation of heart contraction	2/61	45/18112	0.0100647	0.0541835	0.0350492	Ccn2/Edn1	2
BP	GO:0097485	neuron projection guidance	4/61	251/18112	0.0101347	0.054428	0.0352073	Pou4f3/Bdnf/Edn1/Bmp7	4
BP	GO:0001959	regulation of cytokine-mediated signaling pathway	3/61	133/18112	0.0102172	0.0547387	0.0354083	Traip/Ptprc/Edn1	3
BP	GO:0033559	unsaturated fatty acid metabolic process	3/61	134/18112	0.0104265	0.0554479	0.0358671	Il1b/Anxa1/Edn1	3
BP	GO:0061387	regulation of extent of cell growth	3/61	134/18112	0.0104265	0.0554479	0.0358671	Bdnf/Spp1/Crabp2	3
BP	GO:0030501	positive regulation of bone mineralization	2/61	46/18112	0.0104996	0.0554479	0.0358671	Kl/Bmp7	2
BP	GO:0042304	regulation of fatty acid biosynthetic process	2/61	46/18112	0.0104996	0.0554479	0.0358671	Il1b/Anxa1	2
BP	GO:0046640	regulation of alpha-beta T cell proliferation	2/61	46/18112	0.0104996	0.0554479	0.0358671	Ptprc/Ccr2	2
BP	GO:1900744	regulation of p38MAPK cascade	2/61	46/18112	0.0104996	0.0554479	0.0358671	Il1b/Ccr2	2
BP	GO:0006690	icosanoid metabolic process	3/61	135/18112	0.0106383	0.0559312	0.0361797	Il1b/Anxa1/Edn1	3
BP	GO:0060562	epithelial tube morphogenesis	5/61	396/18112	0.0106416	0.0559312	0.0361797	Wnt1/Tnc/Edn1/Cxcr2/Bmp7	5
BP	GO:0015749	monosaccharide transmembrane transport	3/61	136/18112	0.0108525	0.0569053	0.0368098	Ostn/Il1b/Edn1	3
BP	GO:0043616	keratinocyte proliferation	2/61	47/18112	0.0109427	0.0571726	0.0369827	Eppk1/Cd109	2
BP	GO:0002274	myeloid leukocyte activation	4/61	257/18112	0.0109809	0.0571726	0.0369827	Fgr/Anxa1/Ccr2/Cxcr2	4
BP	GO:0032355	response to estradiol	4/61	257/18112	0.0109809	0.0571726	0.0369827	Ccn2/Il1b/Anxa1/Bmp7	4
BP	GO:0030278	regulation of ossification	3/61	137/18112	0.0110693	0.0574171	0.0371408	Kl/P2ry2/Bmp7	3
BP	GO:0032102	negative regulation of response to external stimulus	5/61	400/18112	0.0110796	0.0574171	0.0371408	Adcyap1/Spp1/Slpi/Eppk1/Cd109	5
BP	GO:0031098	stress-activated protein kinase signaling cascade	4/61	258/18112	0.0111262	0.0575242	0.0372102	Ccn2/Clec7a/Il1b/Ccr2	4
BP	GO:0017157	regulation of exocytosis	4/61	259/18112	0.0112728	0.0580334	0.0375395	Fgr/Anxa1/P2ry2/Ccr2	4
BP	GO:0008277	regulation of G protein-coupled receptor signaling pathway	3/61	138/18112	0.0112886	0.0580334	0.0375395	Adcyap1/Edn1/Itgb3	3
BP	GO:0042326	negative regulation of phosphorylation	5/61	402/18112	0.0113032	0.0580334	0.0375395	Ptprc/Il1b/Fabp4/Bmp7/Cd109	5
BP	GO:0045840	positive regulation of mitotic nuclear division	2/61	48/18112	0.0113939	0.0580958	0.0375799	Il1b/Edn1	2
BP	GO:0045923	positive regulation of fatty acid metabolic process	2/61	48/18112	0.0113939	0.0580958	0.0375799	Il1b/Anxa1	2
BP	GO:2000273	positive regulation of signaling receptor activity	2/61	48/18112	0.0113939	0.0580958	0.0375799	Edn1/Ccr2	2
BP	GO:0031623	receptor internalization	3/61	139/18112	0.0115103	0.0585548	0.0378768	Sele/Itgb3/Cxcr2	3
BP	GO:0044403	biological process involved in symbiotic interaction	4/61	262/18112	0.01172	0.0591709	0.0382754	Ccl4/Trem1/Ifitm1/Itgb3	4
BP	GO:0071887	leukocyte apoptotic process	3/61	140/18112	0.0117346	0.0591709	0.0382754	Ripk3/Anxa1/Cxcr2	3
BP	GO:0002920	regulation of humoral immune response	2/61	49/18112	0.0118532	0.0591709	0.0382754	Ptprc/Il1b	2
BP	GO:0043114	regulation of vascular permeability	2/61	49/18112	0.0118532	0.0591709	0.0382754	Ccl4/Cxcr2	2
BP	GO:0045429	positive regulation of nitric oxide biosynthetic process	2/61	49/18112	0.0118532	0.0591709	0.0382754	Clec7a/Il1b	2
BP	GO:0046633	alpha-beta T cell proliferation	2/61	49/18112	0.0118532	0.0591709	0.0382754	Ptprc/Ccr2	2
BP	GO:0071295	cellular response to vitamin	2/61	49/18112	0.0118532	0.0591709	0.0382754	Trem1/Tnc	2
BP	GO:1903524	positive regulation of blood circulation	2/61	49/18112	0.0118532	0.0591709	0.0382754	Ccn2/Edn1	2
BP	GO:0048705	skeletal system morphogenesis	4/61	263/18112	0.0118715	0.0591709	0.0382754	Acan/Ccn2/Fgr/Bmp7	4
BP	GO:0062197	cellular response to chemical stress	5/61	408/18112	0.0119925	0.0595314	0.0385085	Wnt1/Ripk3/Hk3/Anxa1/Edn1	5
BP	GO:0030324	lung development	4/61	264/18112	0.0120244	0.0595314	0.0385085	Adamts2/Ccn2/Tnc/Slfn4	4
BP	GO:0051607	defense response to virus	4/61	264/18112	0.0120244	0.0595314	0.0385085	Ripk3/Ptprc/Il1b/Ifitm1	4
BP	GO:0140546	defense response to symbiont	4/61	265/18112	0.0121785	0.06016	0.0389151	Ripk3/Ptprc/Il1b/Ifitm1	4
BP	GO:0010718	positive regulation of epithelial to mesenchymal transition	2/61	50/18112	0.0123206	0.0605231	0.03915	Il1b/Bmp7	2
BP	GO:0035902	response to immobilization stress	2/61	50/18112	0.0123206	0.0605231	0.03915	Il1b/Ucn2	2
BP	GO:0090068	positive regulation of cell cycle process	4/61	266/18112	0.0123338	0.0605231	0.03915	Ccn2/Il1b/Anxa1/Edn1	4
BP	GO:0014065	phosphatidylinositol 3-kinase signaling	3/61	143/18112	0.0124225	0.0606898	0.0392579	Fgr/Edn1/Selp	3
BP	GO:0051783	regulation of nuclear division	3/61	143/18112	0.0124225	0.0606898	0.0392579	Il1b/Edn1/Bmp7	3
BP	GO:0030323	respiratory tube development	4/61	267/18112	0.0124905	0.060754	0.0392994	Adamts2/Ccn2/Tnc/Slfn4	4
BP	GO:0031669	cellular response to nutrient levels	4/61	267/18112	0.0124905	0.060754	0.0392994	Trem1/Cd68/Tnc/Ucn2	4
BP	GO:0042471	ear morphogenesis	3/61	144/18112	0.0126569	0.0612948	0.0396492	Wnt1/Pou4f3/Edn1	3
BP	GO:0060759	regulation of response to cytokine stimulus	3/61	144/18112	0.0126569	0.0612948	0.0396492	Traip/Ptprc/Edn1	3
BP	GO:0045933	positive regulation of muscle contraction	2/61	51/18112	0.0127959	0.0614316	0.0397377	Ccn2/Edn1	2
BP	GO:0046638	positive regulation of alpha-beta T cell differentiation	2/61	51/18112	0.0127959	0.0614316	0.0397377	Anxa1/Il2rg	2
BP	GO:0071398	cellular response to fatty acid	2/61	51/18112	0.0127959	0.0614316	0.0397377	Il1b/Edn1	2
BP	GO:1904407	positive regulation of nitric oxide metabolic process	2/61	51/18112	0.0127959	0.0614316	0.0397377	Clec7a/Il1b	2
BP	GO:1901654	response to ketone	5/61	417/18112	0.0130794	0.062401	0.0403648	Spp1/Tnc/Il1b/Dsg1/Edn1	5
BP	GO:0060348	bone development	4/61	271/18112	0.0131298	0.062401	0.0403648	Wnt1/Ostn/Adamts7/Ptprc	4
BP	GO:0001914	regulation of T cell mediated cytotoxicity	2/61	52/18112	0.0132792	0.062401	0.0403648	Ripk3/Ptprc	2
BP	GO:0043370	regulation of CD4-positive, alpha-beta T cell differentiation	2/61	52/18112	0.0132792	0.062401	0.0403648	Anxa1/Il2rg	2
BP	GO:0043507	positive regulation of JUN kinase activity	2/61	52/18112	0.0132792	0.062401	0.0403648	Il1b/Edn1	2
BP	GO:0045071	negative regulation of viral genome replication	2/61	52/18112	0.0132792	0.062401	0.0403648	Ifitm1/Slpi	2
BP	GO:0045332	phospholipid translocation	2/61	52/18112	0.0132792	0.062401	0.0403648	Atp8b1/Kcnn4	2
BP	GO:0050798	activated T cell proliferation	2/61	52/18112	0.0132792	0.062401	0.0403648	Ripk3/Itgal	2
BP	GO:0055093	response to hyperoxia	2/61	52/18112	0.0132792	0.062401	0.0403648	Bdnf/Ccr2	2
BP	GO:1903053	regulation of extracellular matrix organization	2/61	52/18112	0.0132792	0.062401	0.0403648	Aebp1/Itgb3	2
BP	GO:0010811	positive regulation of cell-substrate adhesion	3/61	147/18112	0.0133752	0.0627193	0.0405706	Spp1/Trem1/Itgb3	3
BP	GO:0001909	leukocyte mediated cytotoxicity	3/61	148/18112	0.0136197	0.0633304	0.0409659	Ripk3/Trem1/Ptprc	3
BP	GO:0034219	carbohydrate transmembrane transport	3/61	148/18112	0.0136197	0.0633304	0.0409659	Ostn/Il1b/Edn1	3
BP	GO:0048675	axon extension	3/61	148/18112	0.0136197	0.0633304	0.0409659	Pou4f3/Bdnf/Edn1	3
BP	GO:0120161	regulation of cold-induced thermogenesis	3/61	148/18112	0.0136197	0.0633304	0.0409659	Adcyap1/Ccr2/Fabp4	3
BP	GO:0045124	regulation of bone resorption	2/61	53/18112	0.0137703	0.0638967	0.0413323	Spp1/Itgb3	2
BP	GO:0007589	body fluid secretion	3/61	149/18112	0.0138668	0.0640762	0.0414484	Edn1/P2ry2/Kcnn4	3
BP	GO:0050729	positive regulation of inflammatory response	3/61	149/18112	0.0138668	0.0640762	0.0414484	Il1b/Ccr2/Fabp4	3
BP	GO:0051348	negative regulation of transferase activity	4/61	276/18112	0.0139579	0.064363	0.0416339	Ptprc/Il1b/Fabp4/Bmp7	4
BP	GO:0106106	cold-induced thermogenesis	3/61	150/18112	0.0141164	0.0649591	0.0420195	Adcyap1/Ccr2/Fabp4	3
BP	GO:0032330	regulation of chondrocyte differentiation	2/61	54/18112	0.0142693	0.0653911	0.0422989	Ccn2/Adamts7	2
BP	GO:0048247	lymphocyte chemotaxis	2/61	54/18112	0.0142693	0.0653911	0.0422989	Ccl4/Ccr2	2
BP	GO:0006633	fatty acid biosynthetic process	3/61	152/18112	0.0146234	0.0668755	0.0432591	Il1b/Anxa1/Edn1	3
BP	GO:0032941	secretion by tissue	2/61	55/18112	0.014776	0.0674344	0.0436207	P2ry2/Kcnn4	2
BP	GO:0001837	epithelial to mesenchymal transition	3/61	154/18112	0.0151405	0.068815	0.0445137	Il1b/Edn1/Bmp7	3
BP	GO:0045667	regulation of osteoblast differentiation	3/61	154/18112	0.0151405	0.068815	0.0445137	Ostn/Ifitm1/Bmp7	3
BP	GO:0001662	behavioral fear response	2/61	56/18112	0.0152904	0.0690714	0.0446796	Adcyap1/Bdnf	2
BP	GO:0034204	lipid translocation	2/61	56/18112	0.0152904	0.0690714	0.0446796	Atp8b1/Kcnn4	2
BP	GO:0070169	positive regulation of biomineral tissue development	2/61	56/18112	0.0152904	0.0690714	0.0446796	Kl/Bmp7	2
BP	GO:0034341	response to interferon-gamma	3/61	155/18112	0.015403	0.0694387	0.0449171	Ccl4/Ifitm1/Edn1	3
BP	GO:0002209	behavioral defense response	2/61	57/18112	0.0158124	0.0705672	0.0456472	Adcyap1/Bdnf	2
BP	GO:0010517	regulation of phospholipase activity	2/61	57/18112	0.0158124	0.0705672	0.0456472	Sele/Anxa1	2
BP	GO:0038066	p38MAPK cascade	2/61	57/18112	0.0158124	0.0705672	0.0456472	Il1b/Ccr2	2
BP	GO:0110151	positive regulation of biomineralization	2/61	57/18112	0.0158124	0.0705672	0.0456472	Kl/Bmp7	2
BP	GO:1903202	negative regulation of oxidative stress-induced cell death	2/61	57/18112	0.0158124	0.0705672	0.0456472	Wnt1/Hk3	2
BP	GO:0001666	response to hypoxia	5/61	439/18112	0.0160141	0.0713239	0.0461366	Bdnf/Il1b/Edn1/Ucn2/Ccr2	5
BP	GO:0051092	positive regulation of NF-kappaB transcription factor activity	3/61	158/18112	0.0162058	0.0720328	0.0465952	Clec7a/Ripk3/Il1b	3
BP	GO:0002673	regulation of acute inflammatory response	2/61	58/18112	0.016342	0.0723485	0.0467994	Adcyap1/Il1b	2
BP	GO:0043300	regulation of leukocyte degranulation	2/61	58/18112	0.016342	0.0723485	0.0467994	Fgr/Ccr2	2
BP	GO:0046394	carboxylic acid biosynthetic process	4/61	290/18112	0.0164515	0.0726882	0.0470191	Il1b/Anxa1/Edn1/Crabp2	4
BP	GO:0030856	regulation of epithelial cell differentiation	3/61	160/18112	0.0167538	0.0738767	0.0477879	Il1b/Eppk1/Cd109	3
BP	GO:0016053	organic acid biosynthetic process	4/61	292/18112	0.0168291	0.0739882	0.04786	Il1b/Anxa1/Edn1/Crabp2	4
BP	GO:0050873	brown fat cell differentiation	2/61	59/18112	0.0168792	0.0739882	0.04786	Fabp4/Bmp7	2
BP	GO:1905517	macrophage migration	2/61	59/18112	0.0168792	0.0739882	0.04786	Trem1/Ccr2	2
BP	GO:0010665	regulation of cardiac muscle cell apoptotic process	2/61	60/18112	0.0174238	0.0759253	0.0491131	Trem1/Cxcr2	2
BP	GO:0021545	cranial nerve development	2/61	60/18112	0.0174238	0.0759253	0.0491131	Pou4f3/Atp8b1	2
BP	GO:0036296	response to increased oxygen levels	2/61	60/18112	0.0174238	0.0759253	0.0491131	Bdnf/Ccr2	2
BP	GO:0031349	positive regulation of defense response	4/61	296/18112	0.0176007	0.0763959	0.0494175	Clec7a/Il1b/Ccr2/Fabp4	4
BP	GO:0071695	anatomical structure maturation	4/61	296/18112	0.0176007	0.0763959	0.0494175	Wnt1/Clec7a/Adamts7/Edn1	4
BP	GO:0048016	inositol phosphate-mediated signaling	2/61	61/18112	0.0179758	0.0776499	0.0502287	Clec7a/Edn1	2
BP	GO:0060711	labyrinthine layer development	2/61	61/18112	0.0179758	0.0776499	0.0502287	Rtl1/Bmp7	2
BP	GO:0002253	activation of immune response	4/61	298/18112	0.0179946	0.0776499	0.0502287	Clec7a/Ptprc/Il1b/Kcnn4	4
BP	GO:0008643	carbohydrate transport	3/61	165/18112	0.0181693	0.0782044	0.0505874	Ostn/Il1b/Edn1	3
BP	GO:0001894	tissue homeostasis	4/61	299/18112	0.0181936	0.0782044	0.0505874	Ccn2/Spp1/Itgb3/Ccr2	4
BP	GO:0072006	nephron development	3/61	166/18112	0.0184601	0.0787571	0.0509449	Wnt1/Itgb3/Bmp7	3
BP	GO:1990845	adaptive thermogenesis	3/61	166/18112	0.0184601	0.0787571	0.0509449	Adcyap1/Ccr2/Fabp4	3
BP	GO:0042596	fear response	2/61	62/18112	0.0185353	0.0787571	0.0509449	Adcyap1/Bdnf	2
BP	GO:0045778	positive regulation of ossification	2/61	62/18112	0.0185353	0.0787571	0.0509449	Kl/Bmp7	2
BP	GO:0090303	positive regulation of wound healing	2/61	62/18112	0.0185353	0.0787571	0.0509449	Clec7a/Anxa1	2
BP	GO:0097035	regulation of membrane lipid distribution	2/61	62/18112	0.0185353	0.0787571	0.0509449	Atp8b1/Kcnn4	2
BP	GO:2000377	regulation of reactive oxygen species metabolic process	3/61	167/18112	0.0187536	0.0795324	0.0514464	Clec7a/Ripk3/Olr1	3
BP	GO:0032635	interleukin-6 production	3/61	168/18112	0.0190496	0.0800911	0.0518078	Adcyap1/Clec7a/Il1b	3
BP	GO:0032675	regulation of interleukin-6 production	3/61	168/18112	0.0190496	0.0800911	0.0518078	Adcyap1/Clec7a/Il1b	3
BP	GO:0001755	neural crest cell migration	2/61	63/18112	0.019102	0.0800911	0.0518078	Edn1/Bmp7	2
BP	GO:0010662	regulation of striated muscle cell apoptotic process	2/61	63/18112	0.019102	0.0800911	0.0518078	Trem1/Cxcr2	2
BP	GO:0050854	regulation of antigen receptor-mediated signaling pathway	2/61	63/18112	0.019102	0.0800911	0.0518078	Ptprc/Kcnn4	2
BP	GO:0055078	sodium ion homeostasis	2/61	63/18112	0.019102	0.0800911	0.0518078	Spp1/Edn1	2
BP	GO:0010563	negative regulation of phosphorus metabolic process	5/61	460/18112	0.0191999	0.0801985	0.0518773	Ptprc/Il1b/Fabp4/Bmp7/Cd109	5
BP	GO:0045936	negative regulation of phosphate metabolic process	5/61	460/18112	0.0191999	0.0801985	0.0518773	Ptprc/Il1b/Fabp4/Bmp7/Cd109	5
BP	GO:0010469	regulation of signaling receptor activity	3/61	169/18112	0.0193483	0.0806664	0.0521799	Nptx2/Edn1/Ccr2	3
BP	GO:0001960	negative regulation of cytokine-mediated signaling pathway	2/61	64/18112	0.019676	0.0815725	0.052766	Traip/Ptprc	2
BP	GO:0035306	positive regulation of dephosphorylation	2/61	64/18112	0.019676	0.0815725	0.052766	Ripk3/Ptprc	2
BP	GO:0046850	regulation of bone remodeling	2/61	64/18112	0.019676	0.0815725	0.052766	Spp1/Itgb3	2
BP	GO:0030072	peptide hormone secretion	4/61	307/18112	0.0198355	0.0820806	0.0530947	Adcyap1/Il1b/Anxa1/Edn1	4
BP	GO:0002705	positive regulation of leukocyte mediated immunity	3/61	171/18112	0.0199534	0.0821507	0.0531401	Clec7a/Ptprc/Il1b	3
BP	GO:0035270	endocrine system development	3/61	171/18112	0.0199534	0.0821507	0.0531401	Adcyap1/Anxa1/Edn1	3
BP	GO:1901653	cellular response to peptide	5/61	466/18112	0.0201818	0.0821507	0.0531401	Wnt1/Kl/Il1b/Edn1/Itgb3	5
BP	GO:0001913	T cell mediated cytotoxicity	2/61	65/18112	0.0202572	0.0821507	0.0531401	Ripk3/Ptprc	2
BP	GO:0010656	negative regulation of muscle cell apoptotic process	2/61	65/18112	0.0202572	0.0821507	0.0531401	Adcyap1/Edn1	2
BP	GO:0010659	cardiac muscle cell apoptotic process	2/61	65/18112	0.0202572	0.0821507	0.0531401	Trem1/Cxcr2	2
BP	GO:0032757	positive regulation of interleukin-8 production	2/61	65/18112	0.0202572	0.0821507	0.0531401	Clec7a/Il1b	2
BP	GO:0043407	negative regulation of MAP kinase activity	2/61	65/18112	0.0202572	0.0821507	0.0531401	Il1b/Bmp7	2
BP	GO:0051785	positive regulation of nuclear division	2/61	65/18112	0.0202572	0.0821507	0.0531401	Il1b/Edn1	2
BP	GO:0045834	positive regulation of lipid metabolic process	3/61	172/18112	0.0202599	0.0821507	0.0531401	Fgr/Il1b/Anxa1	3
BP	GO:0045765	regulation of angiogenesis	4/61	309/18112	0.0202599	0.0821507	0.0531401	Il1b/Itgb3/Ccr2/Cxcr2	4
BP	GO:0007162	negative regulation of cell adhesion	4/61	310/18112	0.0204742	0.0828681	0.0536041	Wnt1/Tnc/Ptprc/Anxa1	4
BP	GO:0000768	syncytium formation by plasma membrane fusion	2/61	66/18112	0.0208455	0.0839116	0.0542791	Wnt1/Cd109	2
BP	GO:0060688	regulation of morphogenesis of a branching structure	2/61	66/18112	0.0208455	0.0839116	0.0542791	Il1b/Bmp7	2
BP	GO:0140253	cell-cell fusion	2/61	66/18112	0.0208455	0.0839116	0.0542791	Wnt1/Cd109	2
BP	GO:1901342	regulation of vasculature development	4/61	313/18112	0.0211254	0.0848844	0.0549084	Il1b/Itgb3/Ccr2/Cxcr2	4
BP	GO:0031670	cellular response to nutrient	2/61	67/18112	0.0214409	0.0859964	0.0556277	Trem1/Tnc	2
BP	GO:0002790	peptide secretion	4/61	315/18112	0.0215666	0.0861888	0.0557522	Adcyap1/Il1b/Anxa1/Edn1	4
BP	GO:0071222	cellular response to lipopolysaccharide	4/61	315/18112	0.0215666	0.0861888	0.0557522	Trem1/Cd68/Il1b/P2ry2	4
BP	GO:0002449	lymphocyte mediated immunity	4/61	317/18112	0.0220135	0.087152	0.0563752	Ripk3/Ptprc/Il1b/Ccr2	4
BP	GO:0006949	syncytium formation	2/61	68/18112	0.0220434	0.087152	0.0563752	Wnt1/Cd109	2
BP	GO:0010658	striated muscle cell apoptotic process	2/61	68/18112	0.0220434	0.087152	0.0563752	Trem1/Cxcr2	2
BP	GO:0014009	glial cell proliferation	2/61	68/18112	0.0220434	0.087152	0.0563752	Adcyap1/Il1b	2
BP	GO:0060761	negative regulation of response to cytokine stimulus	2/61	68/18112	0.0220434	0.087152	0.0563752	Traip/Ptprc	2
BP	GO:2000514	regulation of CD4-positive, alpha-beta T cell activation	2/61	68/18112	0.0220434	0.087152	0.0563752	Anxa1/Il2rg	2
BP	GO:0046887	positive regulation of hormone secretion	3/61	179/18112	0.022478	0.0885544	0.0572824	Adcyap1/Spp1/Edn1	3
BP	GO:0048015	phosphatidylinositol-mediated signaling	3/61	179/18112	0.022478	0.0885544	0.0572824	Fgr/Edn1/Selp	3
BP	GO:0001954	positive regulation of cell-matrix adhesion	2/61	69/18112	0.0226529	0.0889276	0.0575238	Trem1/Itgb3	2
BP	GO:0099601	regulation of neurotransmitter receptor activity	2/61	69/18112	0.0226529	0.0889276	0.0575238	Nptx2/Ccr2	2
BP	GO:0043588	skin development	4/61	320/18112	0.0226944	0.0889332	0.0575274	Adamts2/Fmod/Anxa1/Cd109	4
BP	GO:1902105	regulation of leukocyte differentiation	4/61	322/18112	0.0231555	0.0903876	0.0584682	Ptprc/Anxa1/Il2rg/Ccr2	4
BP	GO:0014911	positive regulation of smooth muscle cell migration	2/61	70/18112	0.0232693	0.0903876	0.0584682	Itgb3/P2ry2	2
BP	GO:0015909	long-chain fatty acid transport	2/61	70/18112	0.0232693	0.0903876	0.0584682	Anxa1/Fabp4	2
BP	GO:0043506	regulation of JUN kinase activity	2/61	70/18112	0.0232693	0.0903876	0.0584682	Il1b/Edn1	2
BP	GO:1901224	positive regulation of NIK/NF-kappaB signaling	2/61	70/18112	0.0232693	0.0903876	0.0584682	Il1b/Edn1	2
BP	GO:0048017	inositol lipid-mediated signaling	3/61	182/18112	0.0234677	0.0909988	0.0588636	Fgr/Edn1/Selp	3
BP	GO:0043123	positive regulation of I-kappaB kinase/NF-kappaB signaling	3/61	183/18112	0.0238028	0.0920031	0.0595132	Clec7a/Il1b/S100a4	3
BP	GO:0002720	positive regulation of cytokine production involved in immune response	2/61	71/18112	0.0238926	0.0920031	0.0595132	Clec7a/Il1b	2
BP	GO:0046637	regulation of alpha-beta T cell differentiation	2/61	71/18112	0.0238926	0.0920031	0.0595132	Anxa1/Il2rg	2
BP	GO:0060986	endocrine hormone secretion	2/61	71/18112	0.0238926	0.0920031	0.0595132	Il1b/Ucn2	2
BP	GO:0071219	cellular response to molecule of bacterial origin	4/61	326/18112	0.0240947	0.0924762	0.0598192	Trem1/Cd68/Il1b/P2ry2	4
BP	GO:0045766	positive regulation of angiogenesis	3/61	184/18112	0.0241405	0.0924762	0.0598192	Il1b/Itgb3/Cxcr2	3
BP	GO:1904018	positive regulation of vasculature development	3/61	184/18112	0.0241405	0.0924762	0.0598192	Il1b/Itgb3/Cxcr2	3
BP	GO:1902107	positive regulation of leukocyte differentiation	3/61	185/18112	0.0244809	0.0932958	0.0603494	Ptprc/Anxa1/Il2rg	3
BP	GO:1903708	positive regulation of hemopoiesis	3/61	185/18112	0.0244809	0.0932958	0.0603494	Ptprc/Anxa1/Il2rg	3
BP	GO:0002711	positive regulation of T cell mediated immunity	2/61	72/18112	0.0245227	0.0932958	0.0603494	Ptprc/Il1b	2
BP	GO:0061045	negative regulation of wound healing	2/61	72/18112	0.0245227	0.0932958	0.0603494	Eppk1/Cd109	2
BP	GO:0043409	negative regulation of MAPK cascade	3/61	186/18112	0.0248238	0.0942795	0.0609857	Ptprc/Il1b/Bmp7	3
BP	GO:0002886	regulation of myeloid leukocyte mediated immunity	2/61	73/18112	0.0251597	0.0949416	0.0614139	Fgr/Ccr2	2
BP	GO:0031103	axon regeneration	2/61	73/18112	0.0251597	0.0949416	0.0614139	Spp1/Tnc	2
BP	GO:0061035	regulation of cartilage development	2/61	73/18112	0.0251597	0.0949416	0.0614139	Ccn2/Adamts7	2
BP	GO:1902905	positive regulation of supramolecular fiber organization	3/61	187/18112	0.0251694	0.0949416	0.0614139	Lmod1/Ccn2/Edn1	3
BP	GO:0001707	mesoderm formation	2/61	74/18112	0.0258033	0.0964299	0.0623767	Itgb3/Bmp7	2
BP	GO:0010332	response to gamma radiation	2/61	74/18112	0.0258033	0.0964299	0.0623767	Ptprc/Il1b	2
BP	GO:0032835	glomerulus development	2/61	74/18112	0.0258033	0.0964299	0.0623767	Itgb3/Bmp7	2
BP	GO:0045428	regulation of nitric oxide biosynthetic process	2/61	74/18112	0.0258033	0.0964299	0.0623767	Clec7a/Il1b	2
BP	GO:0051385	response to mineralocorticoid	2/61	74/18112	0.0258033	0.0964299	0.0623767	Ccn2/Edn1	2
BP	GO:0071772	response to BMP	3/61	189/18112	0.0258683	0.0964299	0.0623767	Wnt1/Adamts7/Bmp7	3
BP	GO:0071773	cellular response to BMP stimulus	3/61	189/18112	0.0258683	0.0964299	0.0623767	Wnt1/Adamts7/Bmp7	3
BP	GO:0048562	embryonic organ morphogenesis	4/61	334/18112	0.0260421	0.0969152	0.0626906	Wnt1/Pou4f3/Edn1/Bmp7	4
BP	GO:0050770	regulation of axonogenesis	3/61	190/18112	0.0262216	0.0974197	0.063017	Bdnf/Spp1/Crabp2	3
BP	GO:0016032	viral process	4/61	335/18112	0.0262921	0.0975181	0.0630806	Ccl4/Ifitm1/Slpi/Itgb3	4
BP	GO:0048146	positive regulation of fibroblast proliferation	2/61	75/18112	0.0264537	0.0979537	0.0633624	Wnt1/Itgb3	2
BP	GO:0022604	regulation of cell morphogenesis	4/61	336/18112	0.0265434	0.0981223	0.0634714	Ostn/Fgr/Anxa1/Itgb3	4
BP	GO:0015833	peptide transport	4/61	337/18112	0.0267963	0.0988921	0.0639694	Adcyap1/Il1b/Anxa1/Edn1	4
BP	GO:0007596	blood coagulation	3/61	192/18112	0.0269362	0.0990633	0.0640802	Prss56/Selp/Itgb3	3
BP	GO:0010212	response to ionizing radiation	3/61	192/18112	0.0269362	0.0990633	0.0640802	Ptprc/Il1b/Anxa1	3
BP	GO:0002704	negative regulation of leukocyte mediated immunity	2/61	76/18112	0.0271107	0.0990633	0.0640802	Ptprc/Ccr2	2
BP	GO:0006029	proteoglycan metabolic process	2/61	76/18112	0.0271107	0.0990633	0.0640802	Acan/Adamts7	2
BP	GO:0015800	acidic amino acid transport	2/61	76/18112	0.0271107	0.0990633	0.0640802	Bdnf/Il1b	2
BP	GO:0045669	positive regulation of osteoblast differentiation	2/61	76/18112	0.0271107	0.0990633	0.0640802	Ifitm1/Bmp7	2
BP	GO:1903305	regulation of regulated secretory pathway	3/61	193/18112	0.0272973	0.0995813	0.0644152	Fgr/P2ry2/Ccr2	3
CC	GO:0009897	external side of plasma membrane	11/62	461/18418	3.4493e-07	3.32243e-05	2.85493e-05	Sele/Clec7a/Itga11/Itgal/Ptprc/Anxa1/Selp/Il2rg/Itgb3/Ccr2/Cxcr2	11
CC	GO:0098636	protein complex involved in cell adhesion	5/62	46/18418	4.52031e-07	3.32243e-05	2.85493e-05	Itga11/Itgal/Tnc/Itgb3/Itgb7	5
CC	GO:0008305	integrin complex	4/62	32/18418	3.89997e-06	0.000191098	0.000164209	Itga11/Itgal/Itgb3/Itgb7	4
CC	GO:0016324	apical plasma membrane	7/62	400/18418	0.000380257	0.0108019	0.00928198	Kl/Atp8b1/Dsg1/Anxa1/Itgb3/P2ry2/Kcnn4	7
CC	GO:0031012	extracellular matrix	7/62	408/18418	0.000428186	0.0108019	0.00928198	Adamts2/Acan/Ccn2/Adamts7/Fmod/Tnc/Bmp7	7
CC	GO:0030312	external encapsulating structure	7/62	410/18418	0.000440894	0.0108019	0.00928198	Adamts2/Acan/Ccn2/Adamts7/Fmod/Tnc/Bmp7	7
CC	GO:0030055	cell-substrate junction	5/62	202/18418	0.000588526	0.0123591	0.01062	Itga11/Ptprc/Eppk1/Itgb3/Itgb7	5
CC	GO:0062023	collagen-containing extracellular matrix	5/62	250/18418	0.00152561	0.0280331	0.0240886	Adamts2/Acan/Fmod/Tnc/Bmp7	5
CC	GO:0043235	receptor complex	6/62	413/18418	0.00261325	0.042683	0.0366771	Olr1/Itga11/Itgal/Il2rg/Itgb3/Itgb7	6
CC	GO:0098802	plasma membrane signaling receptor complex	4/62	181/18418	0.00322902	0.0474666	0.0407876	Itga11/Itgal/Itgb3/Itgb7	4
CC	GO:0005925	focal adhesion	4/62	188/18418	0.00369789	0.0494172	0.0424638	Itga11/Ptprc/Itgb3/Itgb7	4
CC	GO:0045178	basal part of cell	5/62	319/18418	0.00436366	0.0534548	0.0459332	Anxa1/Edn1/Eppk1/P2ry2/Kcnn4	5
CC	GO:0000323	lytic vacuole	6/62	485/18418	0.0057179	0.0600379	0.05159	Cd68/Il1b/Ifitm1/Anxa1/P2ry2/Cxcr2	6
CC	GO:0005764	lysosome	6/62	485/18418	0.0057179	0.0600379	0.05159	Cd68/Il1b/Ifitm1/Anxa1/P2ry2/Cxcr2	6
MF	GO:0005178	integrin binding	8/57	147/16650	3.49529e-08	6.32648e-06	4.4519e-06	Ccn2/Itga11/Spp1/Itgal/Il1b/Esm1/Itgb3/Itgb7	8
MF	GO:0048018	receptor ligand activity	11/57	458/16650	3.56633e-07	2.61026e-05	1.83682e-05	Wnt1/Adcyap1/Bdnf/Ccn2/Ostn/Spp1/Ccl4/Il1b/Edn1/Ucn2/Bmp7	11
MF	GO:0030546	signaling receptor activator activity	11/57	467/16650	4.3264e-07	2.61026e-05	1.83682e-05	Wnt1/Adcyap1/Bdnf/Ccn2/Ostn/Spp1/Ccl4/Il1b/Edn1/Ucn2/Bmp7	11
MF	GO:0050839	cell adhesion molecule binding	8/57	290/16650	6.06159e-06	0.000274287	0.000193014	Ccn2/Itga11/Spp1/Itgal/Il1b/Esm1/Itgb3/Itgb7	8
MF	GO:0019838	growth factor binding	6/57	152/16650	1.29612e-05	0.000469196	0.00033017	Kl/Ccn2/Esm1/Il2rg/Itgb3/Cd109	6
MF	GO:0030246	carbohydrate binding	7/57	263/16650	3.05222e-05	0.000920755	0.000647928	Nptx2/Acan/Sele/Clec7a/Hk3/Olr1/Selp	7
MF	GO:0005125	cytokine activity	6/57	191/16650	4.70139e-05	0.00121565	0.000855441	Wnt1/Spp1/Ccl4/Il1b/Edn1/Bmp7	6
MF	GO:0001664	G protein-coupled receptor binding	7/57	309/16650	8.45628e-05	0.00191323	0.00134633	Wnt1/Adcyap1/Ccl4/Edn1/Ucn2/P2ry2/Ccr2	7
MF	GO:0005520	insulin-like growth factor binding	3/57	29/16650	0.000130486	0.00237987	0.0016747	Ccn2/Esm1/Itgb3	3
MF	GO:0019955	cytokine binding	5/57	144/16650	0.000131629	0.00237987	0.0016747	Il2rg/Itgb3/Ccr2/Cxcr2/Cd109	5
MF	GO:0051427	hormone receptor binding	3/57	30/16650	0.000144633	0.00237987	0.0016747	Adcyap1/Ucn2/Fabp4	3
MF	GO:0019956	chemokine binding	3/57	34/16650	0.000211113	0.00318429	0.00224076	Itgb3/Ccr2/Cxcr2	3
MF	GO:0071855	neuropeptide receptor binding	3/57	37/16650	0.000272134	0.00378895	0.00266626	Adcyap1/Edn1/Ucn2	3
MF	GO:0033691	sialic acid binding	2/57	13/16650	0.000876666	0.0106774	0.00751361	Sele/Selp	2
MF	GO:0005539	glycosaminoglycan binding	5/57	218/16650	0.000884868	0.0106774	0.00751361	Acan/Ccn2/Ptprc/Selp/Bmp7	5
MF	GO:0005179	hormone activity	4/57	129/16650	0.000988875	0.0111867	0.00787197	Adcyap1/Ostn/Edn1/Ucn2	4
MF	GO:0070492	oligosaccharide binding	2/57	17/16650	0.00151516	0.016132	0.011352	Sele/Selp	2
MF	GO:0070851	growth factor receptor binding	4/57	148/16650	0.00164285	0.0165197	0.0116248	Kl/Il1b/Esm1/Itgb3	4
MF	GO:0051428	peptide hormone receptor binding	2/57	20/16650	0.00210287	0.019763	0.0139071	Adcyap1/Ucn2	2
MF	GO:0008201	heparin binding	4/57	160/16650	0.00218376	0.019763	0.0139071	Ccn2/Ptprc/Selp/Bmp7	4
MF	GO:0005126	cytokine receptor binding	5/57	282/16650	0.00274471	0.023398	0.016465	Bdnf/Ccl4/Il1b/Itgb3/Ccr2	5
MF	GO:0016493	C-C chemokine receptor activity	2/57	24/16650	0.00302799	0.023398	0.016465	Ccr2/Cxcr2	2
MF	GO:0031406	carboxylic acid binding	4/57	179/16650	0.00327389	0.023398	0.016465	Sele/Selp/Fabp4/Crabp2	4
MF	GO:0004950	chemokine receptor activity	2/57	25/16650	0.00328408	0.023398	0.016465	Ccr2/Cxcr2	2
MF	GO:0019957	C-C chemokine binding	2/57	25/16650	0.00328408	0.023398	0.016465	Ccr2/Cxcr2	2
MF	GO:0001637	G protein-coupled chemoattractant receptor activity	2/57	26/16650	0.00354996	0.023398	0.016465	Ccr2/Cxcr2	2
MF	GO:0017134	fibroblast growth factor binding	2/57	26/16650	0.00354996	0.023398	0.016465	Kl/Itgb3	2
MF	GO:0048306	calcium-dependent protein binding	3/57	90/16650	0.00361958	0.023398	0.016465	Anxa1/S100a4/Selp	3
MF	GO:0004896	cytokine receptor activity	3/57	95/16650	0.00421352	0.0262981	0.0185058	Il2rg/Ccr2/Cxcr2	3
MF	GO:0001968	fibronectin binding	2/57	36/16650	0.00673238	0.0406187	0.0285831	Ccn2/Itgb3	2
MF	GO:0043394	proteoglycan binding	2/57	39/16650	0.00786678	0.0459319	0.0323219	Tnc/Ptprc	2
MF	GO:0140375	immune receptor activity	3/57	131/16650	0.010222	0.0578185	0.0406864	Il2rg/Ccr2/Cxcr2	3
MF	GO:0048020	CCR chemokine receptor binding	2/57	49/16650	0.0122153	0.066999	0.0471467	Ccl4/Ccr2	2
MF	GO:1901681	sulfur compound binding	4/57	266/16650	0.0129721	0.068798	0.0484127	Ccn2/Ptprc/Selp/Bmp7	4
MF	GO:0008083	growth factor activity	3/57	145/16650	0.0134349	0.068798	0.0484127	Bdnf/Ccn2/Bmp7	3
MF	GO:0005544	calcium-dependent phospholipid binding	2/57	52/16650	0.0136836	0.068798	0.0484127	Cpne4/Anxa1	2
MF	GO:0005504	fatty acid binding	2/57	57/16650	0.0162915	0.0796961	0.0560815	Fabp4/Crabp2	2
MF	GO:0050840	extracellular matrix binding	2/57	63/16650	0.0196771	0.0937253	0.0659538	Spp1/Itgb3	2
KEGG	rno04151	PI3K-Akt signaling pathway	7/35	345/8963	0.000311855	0.0100092	0.0077153	Bdnf/Itga11/Spp1/Tnc/Il2rg/Itgb3/Itgb7	7
KEGG	rno04512	ECM-receptor interaction	5/35	87/8963	1.98071e-05	0.00251551	0.00193901	Itga11/Spp1/Tnc/Itgb3/Itgb7	5
KEGG	rno05144	apoptosis	4/35	55/8963	5.7697e-05	0.00366376	0.00282411	Sele/Itgal/Il1b/Selp	4
KEGG	rno04061	Viral protein interaction with cytokine and cytokine receptor	4/35	85/8963	0.000315249	0.0100092	0.0077153	Ccl4/Il2rg/Ccr2/Cxcr2	4
KEGG	rno05410	Hypertrophic cardiomyopathy	4/35	91/8963	0.000409273	0.0103955	0.00801314	Itga11/Edn1/Itgb3/Itgb7	4
KEGG	rno04060	Cytokine-cytokine receptor interaction	6/35	269/8963	0.000538999	0.0111617	0.00860368	Ccl4/Il1b/Il2rg/Ccr2/Cxcr2/Bmp7	6
KEGG	rno04514	Cell adhesion molecules	5/35	180/8963	0.000615209	0.0111617	0.00860368	Sele/Itgal/Ptprc/Selp/Itgb7	5
KEGG	rno04668	TNF signaling pathway	4/35	111/8963	0.000867781	0.013776	0.0106189	Sele/Ripk3/Il1b/Edn1	4
KEGG	rno04510	Focal adhesion	5/35	200/8963	0.00099071	0.01398	0.0107761	Itga11/Spp1/Tnc/Itgb3/Itgb7	5
KEGG	rno04623	Cytosolic DNA-sensing pathway	3/35	55/8963	0.00124537	0.0158162	0.0121915	Ripk3/Ccl4/Il1b	3
KEGG	rno05165	Human papillomavirus infection	6/35	353/8963	0.00220378	0.0254436	0.0196126	Wnt1/Itga11/Spp1/Tnc/Itgb3/Itgb7	6
KEGG	rno05418	Fluid shear stress and atherosclerosis	4/35	151/8963	0.00270015	0.0285765	0.0220275	Sele/Il1b/Edn1/Itgb3	4
KEGG	rno05412	Arrhythmogenic right ventricular cardiomyopathy	3/35	77/8963	0.00327459	0.0319903	0.0246589	Itga11/Itgb3/Itgb7	3
KEGG	rno04062	Chemokine signaling pathway	4/35	182/8963	0.00526767	0.042845	0.033026	Fgr/Ccl4/Ccr2/Cxcr2	4
KEGG	rno04620	Toll-like receptor signaling pathway	3/35	93/8963	0.00556691	0.042845	0.033026	Spp1/Ccl4/Il1b	3
KEGG	rno04613	Neutrophil extracellular trap formation	4/35	185/8963	0.00558039	0.042845	0.033026	Clec7a/Itgal/Selp/Itgb3	4
KEGG	rno05414	Dilated cardiomyopathy	3/35	94/8963	0.00573516	0.042845	0.033026	Itga11/Itgb3/Itgb7	3
KEGG	rno04064	NF-kappa B signaling pathway	3/35	98/8963	0.00643871	0.0444425	0.0342574	Ccl4/Bcl2a1/Il1b	3
KEGG	rno05150	Staphylococcus aureus infection	3/35	100/8963	0.006809	0.0444425	0.0342574	Itgal/Dsg1/Selp	3
KEGG	rno04933	AGE-RAGE signaling pathway in diabetic complications	3/35	101/8963	0.00699882	0.0444425	0.0342574	Sele/Il1b/Edn1	3
KEGG	rno05417	Lipid and atherosclerosis	4/35	209/8963	0.00854071	0.0495735	0.0382125	Sele/Olr1/Il1b/Selp	4
KEGG	rno05340	Primary immunodeficiency	2/35	36/8963	0.00858754	0.0495735	0.0382125	Ptprc/Il2rg	2
KEGG	rno05143	African trypanosomiasis	2/35	40/8963	0.010529	0.0564653	0.0435248	Sele/Il1b	2
KEGG	rno04810	Regulation of actin cytoskeleton	4/35	223/8963	0.0106706	0.0564653	0.0435248	Itga11/Itgal/Itgb3/Itgb7	4
KEGG	rno05163	Human cytomegalovirus infection	4/35	248/8963	0.0152799	0.0776216	0.0598327	Ccl4/Il1b/Itgb3/Cxcr2	4
