# Supplementary material for: Acupuncture Extended the Thrombolysis Window by Suppressing Blood–Brain Barrier Disruption and Regulating Autophagy–Apoptosis Balance after Ischemic Stroke
Source: Brain Sci. 2024 Apr 19;14(4):399. doi: 10.3390/brainsci14040399 (PMC11048240; doi:10.3390/brainsci14040399)
Supplement: Supplementary file 1 [file brainsci-14-00399-s001.zip › Table S3.xlsx]

## Sheet: Differential expression miRNA
Human_miRNA	Human_miRBase	log2FC	t	B	PValue	FDR
hsa-miR-4796-3p	MIMAT0019971	-1.13726	-30.9542	2.68361	6.55e-05	0.0311242
spike_control_v2_29		0.36299	27.6075	2.4592	9.28e-05	0.0311242
hsa-miR-5681b	MIMAT0022480	0.446673	21.0399	1.82355	0.00021166	0.0311242
hsa-miR-675-3p	MIMAT0006790	0.33408	20.4303	1.74647	0.000231392	0.0311242
hsa-miR-20a-5p	MIMAT0000075	-0.411451	-19.9546	1.68362	0.000248515	0.0311242
hsa-miR-4530	MIMAT0019069	-0.30664	-19.1023	1.56464	0.000283647	0.0311242
hsa-miR-99a-5p	MIMAT0000097	0.429981	18.1908	1.42762	0.0003289	0.0311242
hsa-miR-411-5p	MIMAT0003329	-0.371265	-18.1884	1.42725	0.000329029	0.0311242
hsa-miR-5009-3p	MIMAT0021042	-0.668554	-17.9461	1.38899	0.000342655	0.0311242
hsa-miR-1246	MIMAT0005898	0.297167	17.8667	1.37627	0.000347285	0.0311242
hsa-miR-4677-3p	MIMAT0019761	-1.21589	-17.716	1.35191	0.000356299	0.0311242
spike_control_v2_4		0.317175	16.9105	1.21607	0.000410138	0.0311242
hsa-miR-708-5p	MIMAT0004926	-0.421087	-16.8535	1.2061	0.000414343	0.0311242
hsa-miR-32-3p	MIMAT0004505	0.506564	16.743	1.18661	0.000422661	0.0311242
hsa-miR-4706	MIMAT0019806	-0.748525	-16.6058	1.16212	0.000433309	0.0311242
spike_control_v2_22		0.292492	15.3711	0.92769	0.000547166	0.0311242
hsa-miR-3150a-5p	MIMAT0019206	0.876384	15.1624	0.885355	0.000570215	0.0311242
hsa-miR-5089	MIMAT0021081	-1.71735	-14.955	0.842491	0.000594394	0.0311242
hsa-miR-4699-5p	MIMAT0019794	-0.626832	-14.8643	0.823473	0.0006054	0.0311242
hsa-miR-4692	MIMAT0019783	-0.900947	-14.4552	0.735647	0.000658537	0.0311242
hsa-miR-3123	MIMAT0014985	-0.478373	-14.2415	0.688399	0.000688758	0.0311242
hsa-miR-1280	MIMAT0005946	0.395903	14.2082	0.68095	0.000693631	0.0311242
spike_control_v2_49		0.345758	14.0151	0.637272	0.000722812	0.0311242
hsa-miR-320d	MIMAT0006764	0.455103	13.7984	0.587248	0.000757545	0.0311242
hsa-miR-5009-5p	MIMAT0021041	-0.23774	-13.6586	0.554443	0.000781108	0.0311242
hsa-miR-7-5p	MIMAT0000252	0.19354	13.5928	0.538835	0.000792543	0.0311242
hsa-miR-4714-3p	MIMAT0019823	-1.78725	-13.215	0.447245	0.000862665	0.0311242
hsa-miR-486-5p	MIMAT0002177	0.522127	13.1299	0.426124	0.000879593	0.0311242
hsa-miR-4693-3p	MIMAT0019785	-1.12472	-13.0171	0.397872	0.000902695	0.0311242
hsa-miR-4436b-3p	MIMAT0019941	-1.64116	-12.9372	0.377638	0.00091957	0.0311242
hsa-miR-4680-3p	MIMAT0019765	-0.947961	-12.8975	0.367545	0.000928092	0.0311242
hsa-miR-4666a-5p	MIMAT0019741	-0.178436	-12.7696	0.334726	0.000956291	0.0311242
hsa-miR-23b-3p	MIMAT0000418	0.206314	12.737	0.326277	0.000963673	0.0311242
hsa-miR-3960	MIMAT0019337	0.500242	12.0657	0.146153	0.00113368	0.0311242
hsa-miR-4999-3p	MIMAT0021018	-0.193737	-11.9993	0.127628	0.00115261	0.0311242
hsa-miR-3117-3p	MIMAT0014979	0.166048	11.8405	0.0828291	0.00119958	0.0311242
hsa-miR-505-5p	MIMAT0004776	-0.967932	-11.8238	0.0780724	0.00120466	0.0311242
hsa-miR-559	MIMAT0003223	0.441074	11.7745	0.0639887	0.00121984	0.0311242
hsa-miR-548a-5p	MIMAT0004803	-0.576264	-11.76	0.0598356	0.00122434	0.0311242
spike_control_v2_8		0.37485	11.6968	0.041668	0.00124424	0.0311242
hsa-miR-3649	MIMAT0018069	-0.279259	-11.3247	-0.0679653	0.00137068	0.0311242
hsa-miR-3147	MIMAT0015019	-0.204072	-11.3117	-0.0718774	0.0013754	0.0311242
hsa-miR-361-3p	MIMAT0004682	0.161547	11.3075	-0.0731418	0.00137693	0.0311242
hsa-miR-4779	MIMAT0019938	-0.168734	-11.2216	-0.0991504	0.00140872	0.0311242
hsa-miR-4521	MIMAT0019058	-0.324915	-11.059	-0.148998	0.00147154	0.0311242
hsa-miR-3140-3p	MIMAT0015008	-1.8431	-11.0057	-0.165544	0.00149296	0.0311242
hsa-miR-5094	MIMAT0021086	-0.353242	-10.894	-0.200507	0.00153915	0.0311242
spike_control_v2_37		0.212709	10.8826	-0.204099	0.00154396	0.0311242
hsa-miR-125b-5p	MIMAT0000423	0.529723	10.8347	-0.219269	0.00156447	0.0311242
hsa-miR-124-3p	MIMAT0000422	0.287425	10.8067	-0.228145	0.00157658	0.0311242
hsa-miR-1304-5p	MIMAT0005892	-0.573747	-10.7972	-0.23118	0.00158074	0.0311242
spike_control_v2_2		0.453938	10.7295	-0.252818	0.00161071	0.0311242
hsa-miR-3622a-5p	MIMAT0018003	-0.995161	-10.6976	-0.263066	0.00162508	0.0311242
hsa-miR-4510	MIMAT0019047	-0.602692	-10.633	-0.283954	0.00165474	0.0311242
hsa-miR-3139	MIMAT0015007	-0.898242	-10.5499	-0.311032	0.00169393	0.0311242
hsa-miR-604	MIMAT0003272	-1.16534	-10.4635	-0.339467	0.00173601	0.0311242
hsa-miR-15a-5p	MIMAT0000068	-0.339529	-10.361	-0.373527	0.00178769	0.0311242
spike_control_v2_7		0.331971	10.3016	-0.393483	0.00181862	0.0311242
hsa-miR-3619-3p	MIMAT0019219	-0.210492	-10.2796	-0.400908	0.00183026	0.0311242
SNORD2		0.595688	10.2138	-0.423188	0.00186559	0.0311242
hsa-miR-3926	MIMAT0018201	-0.326919	-10.1829	-0.433725	0.00188252	0.0311242
hsa-miR-379-5p	MIMAT0000733	0.228529	10.1779	-0.435412	0.00188524	0.0311242
hsa-miR-125a-5p	MIMAT0000443	0.380513	10.1524	-0.444144	0.0018994	0.0311242
hsa-miR-4708-5p	MIMAT0019809	-0.403146	-10.0303	-0.486253	0.00196905	0.0311242
hsa-miR-30d-5p	MIMAT0000245	0.425339	9.96336	-0.509614	0.00200872	0.0311242
hsa-miR-22-3p	MIMAT0000077	0.155156	9.96093	-0.510463	0.00201017	0.0311242
hsa-miR-634	MIMAT0003304	0.589632	9.95654	-0.512001	0.00201281	0.0311242
spike_control_v2_11		0.306616	9.94077	-0.517532	0.00202233	0.0311242
hsa-miR-3682-5p	MIMAT0019222	-0.323972	-9.91403	-0.526934	0.0020386	0.0311242
hsa-miR-4773	MIMAT0019928	-0.166391	-9.76107	-0.581275	0.00213508	0.0311242
hsa-miR-4434	MIMAT0018950	-0.299319	-9.76099	-0.581305	0.00213513	0.0311242
hcmv-miR-US25-2-3p	MIMAT0001583	-0.234912	-9.73151	-0.591891	0.00215441	0.0311242
hsa-miR-1301	MIMAT0005797	-0.128346	-9.67788	-0.611244	0.00219009	0.0311242
hsa-miR-1185-1-3p	MIMAT0022838	-0.144659	-9.67436	-0.612519	0.00219246	0.0311242
hsa-miR-100-5p	MIMAT0000098	0.517651	9.66988	-0.614141	0.00219548	0.0311242
hsa-miR-1273a	MIMAT0005926	-1.16947	-9.65392	-0.619931	0.00220628	0.0311242
hsa-miR-9-5p	MIMAT0000441	0.383847	9.62951	-0.628806	0.00222294	0.0311242
hsa-miR-4669	MIMAT0019749	-0.746371	-9.62693	-0.629745	0.00222471	0.0311242
hsa-miR-3198	MIMAT0015083	-0.611785	-9.59268	-0.642241	0.00224838	0.0311242
hsa-miR-93-5p	MIMAT0000093	-0.160242	-9.54536	-0.659597	0.00228165	0.0311242
hsa-miR-3174	MIMAT0015051	-1.67269	-9.48129	-0.683247	0.00232772	0.0311242
hsa-miR-4423-3p	MIMAT0018936	-0.524203	-9.46285	-0.690089	0.00234122	0.0311242
hsa-miR-218-5p	MIMAT0000275	0.3071	9.44569	-0.696467	0.00235386	0.0311242
hsa-miR-644b-5p	MIMAT0022271	-0.71632	-9.37109	-0.724353	0.00240989	0.0311242
hsa-miR-371a-5p	MIMAT0004687	0.471723	9.35562	-0.730167	0.00242173	0.0311242
hsa-miR-2110	MIMAT0010133	0.26778	9.34691	-0.733447	0.00242844	0.0311242
spike_control_v2_47		0.613565	9.32412	-0.742039	0.00244608	0.0311242
hsv1-miR-H4-5p	MIMAT0008401	-0.801287	-9.26393	-0.764854	0.00249351	0.0313672
hsv1-miR-H8*	MIMAT0012598	0.127483	9.22461	-0.779843	0.00252514	0.0314082
hsa-miR-34c-5p	MIMAT0000686	0.204588	9.13785	-0.813179	0.00259685	0.0319412
hsa-miR-378a-3p	MIMAT0000732	-0.565605	-9.04296	-0.850044	0.00267838	0.0324773
spike_control_v2_40		0.118545	9.01605	-0.860577	0.00270212	0.0324773
hsa-miR-4475	MIMAT0019002	0.164895	8.98625	-0.872281	0.00272872	0.0324773
hsa-miR-509-3-5p	MIMAT0004975	0.259914	8.95414	-0.884944	0.00275778	0.0324773
hsa-miR-4768-3p	MIMAT0019921	-0.788955	-8.89464	-0.908536	0.00281272	0.0327755
hsa-miR-548h-3p/hsa-miR-548z		0.305829	8.84059	-0.930122	0.00286388	0.0329759
hsa-miR-106b-3p	MIMAT0004672	0.321252	8.814	-0.940791	0.00288949	0.0329759
hsa-miR-1207-5p	MIMAT0005871	-0.260995	-8.74802	-0.967425	0.00295438	0.0331122
kshv-miR-K12-3	MIMAT0002193	0.448218	8.7231	-0.977541	0.00297938	0.0331122
hsa-miR-28-5p	MIMAT0000085	-0.829794	-8.71145	-0.982281	0.00299117	0.0331122
hsa-miR-4641	MIMAT0019701	-0.143249	-8.64001	-1.0115	0.0030648	0.0333094
hsa-miR-3664-3p	MIMAT0019220	-2.09979	-8.6067	-1.02522	0.00309995	0.0333094
hsa-miRPlus-A1083		0.167802	8.58569	-1.0339	0.0031224	0.0333094
hsa-miR-145-5p	MIMAT0000437	0.114921	8.57924	-1.03657	0.00312934	0.0333094
hsa-miR-3646	MIMAT0018065	0.323189	8.51674	-1.06255	0.00319757	0.0334538
hsa-miR-3201	MIMAT0015086	-0.238509	-8.50342	-1.06811	0.00321237	0.0334538
hsv1-miR-H3	MIMAT0008400	-0.36338	-8.45494	-1.08844	0.00326699	0.0334538
spike_control_v2_46		0.11066	8.41631	-1.10473	0.00331139	0.0334538
hsa-miR-34a-5p	MIMAT0000255	0.433333	8.40426	-1.10982	0.00332541	0.0334538
hsa-miR-183-5p	MIMAT0000261	0.535728	8.36253	-1.12754	0.00337455	0.0334538
hsa-miR-30b-5p	MIMAT0000420	-0.299128	-8.35906	-1.12902	0.00337868	0.0334538
hsa-miR-99b-3p	MIMAT0004678	0.118202	8.35403	-1.13116	0.00338467	0.0334538
hsa-miR-106a-3p	MIMAT0004517	0.142313	8.1735	-1.20899	0.00360951	0.0343277
spike_control_v2_43		0.558086	8.12472	-1.23033	0.00367361	0.0343277
hsa-miR-3141	MIMAT0015010	-0.193865	-8.11167	-1.23606	0.00369102	0.0343277
hsa-miR-5579-3p	MIMAT0022270	-1.95162	-8.09996	-1.24122	0.00370673	0.0343277
hsa-miR-1182	MIMAT0005827	-0.322947	-8.09096	-1.24518	0.00371887	0.0343277
hsa-miR-4455	MIMAT0018977	0.380075	8.06407	-1.25706	0.00375544	0.0343277
hsa-miR-1260b	MIMAT0015041	0.354828	8.04485	-1.26558	0.00378186	0.0343277
hsa-miR-4678	MIMAT0019762	-1.28203	-8.01012	-1.28102	0.00383024	0.0343277
kshv-miR-K12-6-5p	MIMAT0002188	0.349034	7.99257	-1.28885	0.003855	0.0343277
hsa-miR-4499	MIMAT0019035	-0.223904	-7.98329	-1.29299	0.00386817	0.0343277
hsa-miR-4644	MIMAT0019704	-0.573387	-7.98292	-1.29316	0.00386869	0.0343277
hsa-miR-5010-5p	MIMAT0021043	-0.510198	-7.97907	-1.29488	0.00387418	0.0343277
hsa-miR-4445-3p	MIMAT0018964	-0.408239	-7.97686	-1.29587	0.00387734	0.0343277
hsa-miR-378d	MIMAT0018926	-1.76357	-7.95603	-1.30521	0.00390722	0.0343277
hsa-miR-219-2-3p	MIMAT0004675	0.33699	7.88859	-1.33561	0.00400608	0.0349191
hsa-miR-128	MIMAT0000424	0.357546	7.84879	-1.35368	0.00406596	0.0349707
hsa-miR-511	MIMAT0002808	-0.589085	-7.84273	-1.35644	0.00407517	0.0349707
hsv2-miR-H7-3p	MIMAT0015375	0.40497	7.81298	-1.37002	0.00412084	0.0350906
hsa-miR-618	MIMAT0003287	-0.111291	-7.78995	-1.38057	0.00415668	0.0351255
hsa-miR-4770	MIMAT0019924	0.181661	7.68671	-1.42827	0.00432236	0.0359469
hsa-miR-4769-5p	MIMAT0019922	-0.191365	-7.65871	-1.44132	0.0043688	0.0359469
spike_control_v2_12		0.170504	7.64124	-1.44948	0.0043981	0.0359469
hsa-miR-130b-5p	MIMAT0004680	0.476423	7.63507	-1.45238	0.00440852	0.0359469
hsa-miR-127-5p	MIMAT0004604	-0.269871	-7.6305	-1.45452	0.00441624	0.0359469
hsa-miR-4441	MIMAT0018959	0.27017	7.59867	-1.46947	0.0044706	0.0360768
spike_control_v2_5		0.412284	7.58317	-1.47678	0.00449738	0.0360768
hsa-miR-376a-5p	MIMAT0003386	0.164647	7.56014	-1.48766	0.00453757	0.0361373
hsa-miR-17-5p	MIMAT0000070	-0.754502	-7.53051	-1.50171	0.00458997	0.0362936
hsa-miR-1247-5p	MIMAT0005899	0.264409	7.42348	-1.55295	0.00478601	0.0372155
ebv-miR-BART6-3p	MIMAT0003415	0.369708	7.42019	-1.55453	0.00479221	0.0372155
ebv-miR-BART16	MIMAT0003714	0.129766	7.37961	-1.57417	0.00486956	0.0372155
hsa-miR-5582-5p	MIMAT0022279	0.902112	7.36041	-1.58349	0.00490672	0.0372155
kshv-miR-K12-5*	MIMAT0015218	0.100911	7.35994	-1.58372	0.00490764	0.0372155
hsa-miRPlus-C1066		0.227279	7.35125	-1.58795	0.00492457	0.0372155
hsa-miR-4442	MIMAT0018960	-0.521581	-7.34241	-1.59226	0.00494189	0.0372155
hsa-miR-378i	MIMAT0019074	-1.471	-7.28555	-1.6201	0.00505523	0.0378117
hsa-miR-3945	MIMAT0018361	-0.20116	-7.25981	-1.63278	0.00510766	0.0379475
hsa-miR-378g	MIMAT0018937	-1.96009	-7.2197	-1.65261	0.00519077	0.0383079
hsa-miR-3924	MIMAT0018199	0.49853	7.18498	-1.66988	0.00526418	0.0385923
hsa-miR-4716-5p	MIMAT0019826	0.0974333	7.1499	-1.68741	0.00533971	0.0387835
hsa-miR-2114-5p	MIMAT0011156	-0.0939158	-7.11633	-1.70427	0.00541335	0.0387835
ebv-miR-BART2-3p	MIMAT0004744	-0.318136	-7.09182	-1.71663	0.00546795	0.0387835
hsa-miR-4436b-5p	MIMAT0019940	0.177708	7.08127	-1.72196	0.00549168	0.0387835
hsa-miR-4507	MIMAT0019044	1.0992	7.07917	-1.72302	0.00549641	0.0387835
hsa-miR-3689b-3p/hsa-miR-3689c		0.183558	7.07738	-1.72393	0.00550046	0.0387835
hsa-miR-132-5p	MIMAT0004594	0.369293	7.05197	-1.73681	0.00555829	0.0389209
hsa-miR-4429	MIMAT0018944	0.529806	7.03806	-1.74388	0.00559026	0.0389209
hsa-miR-4294	MIMAT0016849	-1.8958	-7.01649	-1.75487	0.00564035	0.0390242
hsa-miR-4764-5p	MIMAT0019914	-0.516663	-6.97098	-1.77818	0.005748	0.0395219
hsa-miR-5698	MIMAT0022491	-0.87782	-6.94642	-1.79082	0.00580719	0.0396825
hsa-miR-5000-5p	MIMAT0021019	-0.762819	-6.88896	-1.82057	0.00594886	0.0404011
hsa-miR-25-3p	MIMAT0000081	0.384247	6.84679	-1.84256	0.00605572	0.0407534
spike_control_v2_42		0.411164	6.83954	-1.84636	0.00607436	0.0407534
hsa-miR-483-3p	MIMAT0002173	0.0923786	6.79696	-1.86872	0.00618528	0.0409429
hsa-miR-4787-5p	MIMAT0019956	0.576253	6.79683	-1.86879	0.00618562	0.0409429
hsa-miR-514b-3p	MIMAT0015088	-0.0940445	-6.78626	-1.87436	0.00621355	0.0409429
hsa-miR-3150a-3p	MIMAT0015023	-0.310295	-6.75825	-1.88917	0.00628843	0.0411911
spike_control_v2_21		0.188308	6.72097	-1.90897	0.00638991	0.0414835
hsa-miR-769-3p	MIMAT0003887	0.189848	6.7144	-1.91247	0.00640802	0.0414835
hsa-miR-1276	MIMAT0005930	0.163259	6.69901	-1.92069	0.00645071	0.0415162
hsa-miR-92a-3p	MIMAT0000092	0.237531	6.68564	-1.92784	0.00648807	0.0415162
hsa-miR-363-3p	MIMAT0000707	-0.564864	-6.67027	-1.93608	0.00653141	0.0415533
hsa-miR-4640-5p	MIMAT0019699	-0.659697	-6.62954	-1.958	0.00664807	0.0420538
5S_rRNA		0.74841	6.5858	-1.98169	0.00677642	0.0424921
hsa-miR-4531	MIMAT0019070	0.304468	6.5534	-1.99933	0.00687358	0.0424921
ebv-miR-BHRF1-2	MIMAT0000997	0.0929046	6.52373	-2.01556	0.00696416	0.0424921
SNORD48		0.326986	6.51751	-2.01898	0.00698335	0.0424921
hsa-miR-4443	MIMAT0018961	0.313199	6.4952	-2.03124	0.00705274	0.0424921
hsa-miR-4467	MIMAT0018994	0.348283	6.48879	-2.03477	0.00707283	0.0424921
hsa-miR-711	MIMAT0012734	-0.674034	-6.46044	-2.05043	0.00716268	0.0424921
hsa-miR-4516	MIMAT0019053	-0.4261	-6.42739	-2.06877	0.00726929	0.0424921
hsa-miR-4496	MIMAT0019031	0.0996104	6.42534	-2.06991	0.00727596	0.0424921
hsa-miR-4440	MIMAT0018958	1.28167	6.42143	-2.07208	0.00728874	0.0424921
hsa-miR-4668-5p		0.20786	6.37091	-2.10031	0.00745633	0.0424921
hsa-miR-16-5p	MIMAT0000069	-0.131683	-6.33547	-2.12024	0.00757693	0.0424921
hsa-miR-106a-5p	MIMAT0000103	-0.377434	-6.33496	-2.12053	0.0075787	0.0424921
hsa-miR-204-5p	MIMAT0000265	0.16598	6.33406	-2.12104	0.00758179	0.0424921
hsa-miR-5701	MIMAT0022494	0.337255	6.32834	-2.12427	0.00760151	0.0424921
hsa-miR-9-3p	MIMAT0000442	0.346615	6.31065	-2.13427	0.00766292	0.0424921
hsa-miR-4456	MIMAT0018978	0.885397	6.30686	-2.13641	0.00767616	0.0424921
hsa-miR-5006-3p	MIMAT0021034	-0.0908218	-6.2967	-2.14217	0.00771179	0.0424921
hsa-miR-3650	MIMAT0018070	-1.36204	-6.28819	-2.147	0.00774185	0.0424921
ebv-miR-BART13	MIMAT0003424	0.592673	6.28608	-2.1482	0.00774929	0.0424921
hsa-miR-198	MIMAT0000228	-1.2633	-6.28553	-2.14851	0.00775124	0.0424921
hsa-miR-424-3p	MIMAT0004749	0.493585	6.28107	-2.15105	0.00776707	0.0424921
spike_control_v2_48		0.399527	6.27173	-2.15636	0.00780035	0.0424921
hsa-miR-498	MIMAT0002824	0.0933776	6.2706	-2.15701	0.0078044	0.0424921
hsa-miR-335-5p	MIMAT0000765	-0.304627	-6.27054	-2.15704	0.00780458	0.0424921
hsa-miR-185-5p	MIMAT0000455	-0.166722	-6.26181	-2.16202	0.00783588	0.0424921
hsa-miR-4740-5p	MIMAT0019869	0.135445	6.26093	-2.16252	0.00783905	0.0424921
hsa-miR-4308	MIMAT0016861	-0.17676	-6.23112	-2.17956	0.0079472	0.0424921
hsa-miR-551b-3p	MIMAT0003233	-0.343032	-6.22342	-2.18397	0.00797545	0.0424921
hsa-miR-340-5p	MIMAT0004692	0.350427	6.21133	-2.19091	0.00802005	0.0424921
hsa-miR-1908	MIMAT0007881	0.555693	6.19832	-2.19839	0.00806843	0.0424921
hsa-miR-4780	MIMAT0019939	0.175593	6.19435	-2.20068	0.00808327	0.0424921
spike_control_v2_16		0.540956	6.19273	-2.20161	0.00808935	0.0424921
hsa-miR-222-3p	MIMAT0000279	0.349057	6.17986	-2.20904	0.00813774	0.0424921
hsa-miR-3116	MIMAT0014978	-0.0856606	-6.1762	-2.21115	0.00815157	0.0424921
hsa-miR-5191	MIMAT0021122	-0.0999345	-6.17296	-2.21302	0.00816384	0.0424921
hsa-miR-625-5p	MIMAT0003294	-1.28078	-6.14155	-2.23122	0.00828409	0.0424921
hsa-miR-92b-3p	MIMAT0003218	0.125068	6.12277	-2.24214	0.00835709	0.0424921
hsa-miR-548an	MIMAT0019079	0.409804	6.11993	-2.2438	0.00836819	0.0424921
hsa-miR-3653	MIMAT0018073	0.105012	6.11759	-2.24516	0.00837736	0.0424921
hsa-miR-5091	MIMAT0021083	0.130739	6.11749	-2.24522	0.00837776	0.0424921
hsa-miR-320e	MIMAT0015072	0.353573	6.11494	-2.24671	0.00838777	0.0424921
hsa-miR-219-5p	MIMAT0000276	0.266584	6.09439	-2.25871	0.008469	0.0424921
hsa-miR-372	MIMAT0000724	0.0974063	6.09164	-2.26032	0.00847995	0.0424921
hsa-miR-3136-3p	MIMAT0019203	0.475489	6.09033	-2.26108	0.00848515	0.0424921
kshv-miR-K12-1*	MIMAT0015214	0.330548	6.08402	-2.26478	0.00851038	0.0424921
ebv-miR-BART12	MIMAT0003423	0.409885	6.08125	-2.2664	0.00852146	0.0424921
hsa-miR-3182	MIMAT0015062	0.292796	6.06291	-2.27716	0.00859541	0.0426687
hsa-miR-920	MIMAT0004970	0.234819	6.05185	-2.28367	0.00864043	0.0427007
ebv-miR-BART17-5p	MIMAT0003715	-0.422585	-6.02798	-2.29775	0.00873863	0.0428612
hsa-miR-4667-5p	MIMAT0019743	-0.784589	-6.01956	-2.30273	0.00877361	0.0428612
hsa-miR-320c	MIMAT0005793	0.225945	6.01072	-2.30797	0.00881053	0.0428612
hsa-miR-5684	MIMAT0022473	0.0908615	5.99971	-2.3145	0.0088568	0.0428612
hsa-miR-4633-5p	MIMAT0019689	0.48856	5.99741	-2.31586	0.0088665	0.0428612
hsa-miR-3173-3p	MIMAT0015048	-0.173269	-5.98331	-2.32424	0.00892632	0.0429161
spike_control_v2_41		0.313702	5.96746	-2.33369	0.00899419	0.0429161
hsa-miR-3126-5p	MIMAT0014989	0.226038	5.96229	-2.33677	0.00901649	0.0429161
hsa-miR-325	MIMAT0000771	-0.092109	-5.93075	-2.35564	0.00915396	0.0429161
hsa-miR-518e-5p/hsa-miR-519a-5p/hsa-miR-519b-5p/hsa-miR-519c-5p/hsa-miR-522-5p/hsa-miR-523-5p		0.463109	5.92549	-2.3588	0.00917716	0.0429161
hsa-miR-676-3p	MIMAT0018204	-0.108669	-5.92539	-2.35886	0.00917763	0.0429161
hsa-miRPlus-A1087		-0.144601	-5.92278	-2.36043	0.00918916	0.0429161
hsa-miR-1282	MIMAT0005940	-0.228631	-5.91665	-2.36411	0.00921632	0.0429161
hsa-miR-3171	MIMAT0015046	0.240621	5.9143	-2.36553	0.00922677	0.0429161
hsa-miR-4419a	MIMAT0018931	0.395011	5.85036	-2.40418	0.00951708	0.0438289
hsa-miR-4425	MIMAT0018940	-0.0823191	-5.84299	-2.40866	0.00955131	0.0438289
hsa-miR-4732-5p	MIMAT0019855	-0.265306	-5.83361	-2.41437	0.00959507	0.0438289
hsa-miR-4270	MIMAT0016900	-1.21071	-5.83002	-2.41656	0.0096119	0.0438289
hsa-miR-378c	MIMAT0016847	-0.0937841	-5.82809	-2.41774	0.00962099	0.0438289
hsa-miR-5581-3p	MIMAT0022276	0.250897	5.81177	-2.42769	0.00969804	0.043968
hsa-miR-135a-5p	MIMAT0000428	0.211919	5.7995	-2.4352	0.00975655	0.043968
hsa-miR-3914	MIMAT0018188	0.0891485	5.79655	-2.43701	0.00977066	0.043968
hsa-miR-181a-5p	MIMAT0000256	0.424154	5.77586	-2.44971	0.00987054	0.0441001
hsv2-miR-H7-5p	MIMAT0014351	0.201267	5.77398	-2.45087	0.0098797	0.0441001
hsa-miR-335-3p	MIMAT0004703	0.343191	5.76498	-2.4564	0.00992357	0.044118
hsa-miR-1243	MIMAT0005894	-0.93866	-5.74651	-2.46779	0.0100145	0.0443441
hsa-miR-373-3p	MIMAT0000726	0.299237	5.70854	-2.49131	0.0102048	0.0449188
hsa-miR-199a-3p/hsa-miR-199b-3p		0.168256	5.69951	-2.49693	0.0102508	0.0449188
hsa-miRPlus-A1072		0.262193	5.69652	-2.49878	0.010266	0.0449188
hsa-miR-298	MIMAT0004901	-0.142964	-5.68853	-2.50376	0.010307	0.0449207
hsa-miR-550b-3p	MIMAT0018445	0.114254	5.6735	-2.51314	0.0103846	0.0450816
hsa-miRPlus-A1025		-1.38736	-5.66396	-2.5191	0.0104343	0.0451201
hsa-miR-3192	MIMAT0015076	-0.185448	-5.64765	-2.52932	0.01052	0.0452802
hsa-miR-4664-3p	MIMAT0019738	0.0850321	5.62877	-2.54118	0.0106203	0.0452802
hsa-miR-204-3p	MIMAT0022693	0.225933	5.6287	-2.54123	0.0106206	0.0452802
hsa-miR-4529-3p	MIMAT0019068	0.0974324	5.62096	-2.5461	0.0106621	0.0452802
hsv1-miR-H1	MIMAT0003744	-0.476539	-5.61841	-2.54771	0.0106758	0.0452802
hsa-miR-632	MIMAT0003302	-0.166451	-5.60925	-2.55348	0.0107252	0.0453162
hsa-miR-3940-5p	MIMAT0019229	0.561026	5.59814	-2.5605	0.0107856	0.0453381
hsa-miR-4309	MIMAT0016859	-0.0754396	-5.59325	-2.5636	0.0108123	0.0453381
hsa-miR-214-5p	MIMAT0004564	-0.0905377	-5.57547	-2.57486	0.0109102	0.0454643
hsa-miR-127-3p	MIMAT0000446	-0.502349	-5.57288	-2.57651	0.0109246	0.0454643
hsa-miR-208b	MIMAT0004960	-0.0739782	-5.55184	-2.58989	0.0110421	0.0455067
hsa-miR-30b-3p	MIMAT0004589	-0.193247	-5.54888	-2.59178	0.0110587	0.0455067
hsa-miR-152	MIMAT0000438	0.197705	5.53928	-2.5979	0.011113	0.0455067
hsa-miR-4324	MIMAT0016876	0.247202	5.53321	-2.60177	0.0111475	0.0455067
ebv-miR-BART19-3p	MIMAT0003718	0.102213	5.52897	-2.60448	0.0111716	0.0455067
hsa-miR-371b-5p	MIMAT0019892	0.611824	5.52435	-2.60744	0.011198	0.0455067
hsa-miR-1321	MIMAT0005952	-0.265324	-5.5177	-2.6117	0.0112362	0.0455067
hsa-miR-1827	MIMAT0006767	0.42487	5.51294	-2.61474	0.0112636	0.0455067
hsa-miR-151a-5p	MIMAT0004697	-1.63447	-5.46014	-2.64874	0.0115738	0.0465898
hsa-miR-377-3p	MIMAT0000730	-0.0776375	-5.42115	-2.67402	0.01181	0.0473423
hsa-miR-5003-5p	MIMAT0021025	0.150257	5.41526	-2.67786	0.0118463	0.0473423
hsa-miR-4497	MIMAT0019032	0.124631	5.38713	-2.69622	0.0120213	0.0477812
hsa-miR-589-5p	MIMAT0004799	0.1547	5.38377	-2.69842	0.0120424	0.0477812
hsa-miR-514a-5p	MIMAT0022702	-0.269516	-5.3736	-2.70508	0.0121066	0.0478556
hsa-miR-4661-3p	MIMAT0019730	-0.155116	-5.36191	-2.71275	0.012181	0.0478556
hsa-miR-3675-5p	MIMAT0018098	0.763606	5.36038	-2.71376	0.0121908	0.0478556
hsa-miR-4709-3p	MIMAT0019812	0.420502	5.34345	-2.7249	0.0122997	0.048003
hsa-miR-205-3p	MIMAT0009197	-0.181129	-5.33733	-2.72893	0.0123394	0.048003
hsa-miR-4667-3p	MIMAT0019744	0.0961752	5.3344	-2.73087	0.0123585	0.048003
hsa-miR-4778-3p	MIMAT0019937	-0.0753283	-5.32133	-2.7395	0.012444	0.0481661
hsa-miR-1258	MIMAT0005909	0.1375	5.29599	-2.7563	0.012612	0.0486462
SNORD6		0.0808062	5.28562	-2.76319	0.0126815	0.0486995
hsa-miR-656	MIMAT0003332	-0.16186	-5.27926	-2.76742	0.0127245	0.0486995
hsv1-miR-H7*	MIMAT0012596	0.078548	5.27434	-2.77069	0.0127578	0.0486995
hsa-miR-1266	MIMAT0005920	0.256658	5.26456	-2.77722	0.0128244	0.0487324
hsa-miR-3913-3p	MIMAT0019225	0.12408	5.26017	-2.78015	0.0128544	0.0487324
hsa-miR-4645-3p	MIMAT0019706	-0.119117	-5.23967	-2.79387	0.012996	0.0487709
hsa-miR-4726-5p	MIMAT0019845	0.120949	5.23355	-2.79797	0.0130386	0.0487709
hsa-miR-425-3p	MIMAT0001343	0.122756	5.23286	-2.79844	0.0130434	0.0487709
hsa-miR-3685	MIMAT0018113	-0.302687	-5.22671	-2.80256	0.0130864	0.0487709
hsa-miR-720	MIMAT0005954	0.23279	5.21722	-2.80894	0.0131532	0.0487709
hsa-miR-10b-5p	MIMAT0000254	0.646688	5.21515	-2.81034	0.0131679	0.0487709
hsa-let-7d-5p	MIMAT0000065	0.278178	5.20977	-2.81396	0.013206	0.0487709
hsa-miR-218-1-3p	MIMAT0004565	-1.15389	-5.20598	-2.81651	0.0132329	0.0487709
hsa-miR-151a-3p	MIMAT0000757	0.231472	5.20202	-2.81918	0.0132611	0.0487709
hsa-miR-4254	MIMAT0016884	-1.22468	-5.1801	-2.83399	0.0134188	0.0491874
hsa-miR-29a-5p	MIMAT0004503	-0.27359	-5.15257	-2.85267	0.0136203	0.0496849
spike_control_v2_26		0.583882	5.14652	-2.85679	0.013665	0.0496849
hsa-miR-550a-3-5p/hsa-miR-550a-5p		-1.72056	-5.13471	-2.86484	0.0137531	0.0496849
hsa-miR-197-5p	MIMAT0022691	-0.770344	-5.13011	-2.86797	0.0137875	0.0496849
kshv-miR-K12-1	MIMAT0002182	0.522289	5.12797	-2.86943	0.0138036	0.0496849
hsa-miR-4658	MIMAT0019725	-0.188932	-5.12069	-2.87441	0.0138585	0.0496849
hsa-miR-4640-3p	MIMAT0019700	0.0684052	5.11934	-2.87533	0.0138687	0.0496849
hsa-miR-376c	MIMAT0000720	-0.227627	-5.11263	-2.87992	0.0139196	0.0497063
hsa-miR-509-3p	MIMAT0002881	0.217228	5.09591	-2.89138	0.0140474	0.0500015
hsa-miR-26a-5p	MIMAT0000082	0.170756	5.08834	-2.89658	0.0141058	0.0500483
hsa-miR-3612	MIMAT0017989	-0.215853	-5.07759	-2.90398	0.0141893	0.0501837
hsa-miR-665	MIMAT0004952	0.168086	5.05921	-2.91665	0.0143334	0.050532
hsa-miR-3129-5p	MIMAT0014992	-0.0812609	-5.03939	-2.93037	0.014491	0.0509124
hsa-miR-4730	MIMAT0019852	-0.160579	-5.0322	-2.93535	0.0145488	0.0509124
hsa-miR-4483	MIMAT0019017	1.31363	5.02723	-2.9388	0.0145888	0.0509124
hsa-miR-4463	MIMAT0018987	0.126577	5.02015	-2.94372	0.0146462	0.0509124
hsa-miR-4698	MIMAT0019793	0.0720006	5.01336	-2.94844	0.0147014	0.0509124
hcmv-miR-UL112	MIMAT0001577	-1.0514	-5.00619	-2.95344	0.0147601	0.0509124
hsa-miR-361-5p	MIMAT0000703	0.149274	5.00581	-2.95371	0.0147632	0.0509124
hsa-miR-4288	MIMAT0016918	0.100402	4.99124	-2.96387	0.0148834	0.0511675
hsa-miR-4711-3p	MIMAT0019817	0.227286	4.97305	-2.97659	0.0150351	0.0515291
hsa-miR-3158-5p	MIMAT0019211	0.155987	4.96517	-2.98213	0.0151016	0.0515425
hsa-miR-4713-3p	MIMAT0019821	-0.127669	-4.96035	-2.98551	0.0151424	0.0515425
hsa-miR-5585-3p	MIMAT0022286	-0.511831	-4.95606	-2.98852	0.0151787	0.0515425
hsa-miR-15b-5p	MIMAT0000417	-0.217059	-4.94038	-2.99955	0.0153129	0.0517988
hsa-miR-151a-5p/hsa-miR-151b		-1.08771	-4.93633	-3.00241	0.0153478	0.0517988
hsa-miR-3145-5p	MIMAT0019205	-0.139168	-4.92274	-3.01201	0.0154657	0.0520135
hsa-miR-4419b	MIMAT0019034	0.562642	4.91643	-3.01647	0.0155207	0.0520135
hsa-miR-491-3p	MIMAT0004765	0.121676	4.91131	-3.02009	0.0155656	0.0520135
RNU6-1_RNU6-2		0.810985	4.9007	-3.02761	0.0156592	0.0520135
spike_control_v2_10		0.402191	4.89807	-3.02948	0.0156826	0.0520135
hsa-miR-921	MIMAT0004971	-0.187142	-4.89686	-3.03034	0.0156933	0.0520135
hsa-miR-584-5p	MIMAT0003249	0.830496	4.87431	-3.04638	0.0158952	0.0525254
hsa-miR-3154	MIMAT0015028	-1.37584	-4.85053	-3.06336	0.0161118	0.0529581
ebv-miR-BHRF1-3	MIMAT0000998	0.418833	4.83997	-3.07092	0.0162092	0.0529581
hsa-miR-490-5p	MIMAT0004764	0.458603	4.83913	-3.07152	0.016217	0.0529581
hsa-miR-5699	MIMAT0022492	-0.172987	-4.83907	-3.07156	0.0162175	0.0529581
hsa-miR-3175	MIMAT0015052	-0.337683	-4.82933	-3.07855	0.0163082	0.0530975
spike_control_v2_13		0.126261	4.80277	-3.09767	0.0165585	0.0537546
kshv-miR-K12-8	MIMAT0002186	0.139261	4.79247	-3.10511	0.016657	0.0539161
hsa-miR-3186-5p	MIMAT0015067	-0.125902	-4.78371	-3.11144	0.0167413	0.0540309
hsa-miR-3713	MIMAT0018164	-0.0643877	-4.77373	-3.11866	0.0168379	0.0541849
hsa-miR-4284	MIMAT0016915	0.368368	4.74286	-3.14111	0.0171419	0.055003
hsa-miR-30a-5p	MIMAT0000087	0.284809	4.73641	-3.14581	0.0172061	0.0550395
hsa-miR-2467-3p	MIMAT0019953	-0.0694191	-4.72427	-3.15467	0.0173282	0.0550395
hsa-miR-3679-3p	MIMAT0018105	0.082543	4.7237	-3.15509	0.0173339	0.0550395
hsa-miR-934	MIMAT0004977	0.354791	4.7219	-3.15641	0.0173521	0.0550395
hsa-miR-208a	MIMAT0000241	-0.133324	-4.69964	-3.17272	0.0175792	0.0550935
hsa-miR-4518	MIMAT0019055	0.235231	4.69763	-3.1742	0.0175999	0.0550935
hsa-miR-4708-3p	MIMAT0019810	0.349134	4.69448	-3.17651	0.0176324	0.0550935
hsa-miR-3927	MIMAT0018202	-0.18126	-4.69313	-3.1775	0.0176463	0.0550935
hsv2-miR-H24	MIMAT0014707	0.0678584	4.69272	-3.17781	0.0176506	0.0550935
hsa-miR-4752	MIMAT0019889	0.082592	4.6873	-3.18179	0.0177067	0.0550935
hsa-miR-194-3p	MIMAT0004671	1.18308	4.68335	-3.1847	0.0177478	0.0550935
hsa-miR-125b-1-3p	MIMAT0004592	-0.061608	-4.68148	-3.18608	0.0177673	0.0550935
hsa-miR-4478	MIMAT0019006	0.231819	4.66982	-3.19467	0.0178894	0.0553017
hsa-miR-664-3p	MIMAT0005949	0.0629913	4.66556	-3.19782	0.0179344	0.0553017
hsa-miR-4500	MIMAT0019036	0.357778	4.65651	-3.20451	0.0180302	0.0554429
hsv2-miR-H20	MIMAT0014702	0.14489	4.65009	-3.20926	0.0180986	0.0554989
hsa-miRPlus-B1114		-0.727434	-4.63525	-3.22026	0.018258	0.0558331
hsa-miR-4700-5p	MIMAT0019796	0.109058	4.62932	-3.22467	0.0183222	0.0558752
hsa-miR-3675-3p	MIMAT0018099	0.0699793	4.61971	-3.23182	0.0184269	0.0560209
hsa-miR-4292	MIMAT0016919	0.100451	4.61566	-3.23483	0.0184712	0.0560209
hsa-miR-487a	MIMAT0002178	0.484016	4.59208	-3.25243	0.0187322	0.0566571
hsa-miR-374b-5p	MIMAT0004955	-0.276361	-4.57986	-3.26159	0.0188693	0.056771
hsa-miR-4447	MIMAT0018966	1.21596	4.57959	-3.26179	0.0188724	0.056771
hsa-miR-3127-5p	MIMAT0014990	0.0775732	4.5692	-3.26959	0.01899	0.0568887
hsa-miR-2115-3p	MIMAT0011159	0.0983822	4.56706	-3.27119	0.0190143	0.0568887
ebv-miR-BART14	MIMAT0003426	-0.0842552	-4.56049	-3.27613	0.0190893	0.0569592
hsa-miR-129-1-3p	MIMAT0004548	0.0962875	4.54432	-3.28831	0.0192755	0.0572154
hsa-miR-106b-5p	MIMAT0000680	-1.19026	-4.54032	-3.29133	0.0193218	0.0572154
hsa-miR-4285	MIMAT0016913	-0.984924	-4.5396	-3.29187	0.0193302	0.0572154
spike_control_v2_38		0.353089	4.49541	-3.32536	0.0198531	0.058476
hsa-miR-4754	MIMAT0019894	0.469244	4.49469	-3.32591	0.0198618	0.058476
hsa-miR-4765	MIMAT0019916	-0.0591751	-4.48429	-3.33383	0.0199876	0.0585886
spike_control_v2_30		0.600348	4.48278	-3.33498	0.0200058	0.0585886
hsa-miR-4800-5p	MIMAT0019978	-0.172493	-4.46452	-3.34892	0.0202294	0.0589725
hsa-miR-4762-5p	MIMAT0019910	0.0664999	4.46338	-3.34979	0.0202435	0.0589725
hsa-miR-4732-3p	MIMAT0019856	0.244152	4.44255	-3.36576	0.0205028	0.0595711
hsa-miR-3686	MIMAT0018114	0.279626	4.42508	-3.37919	0.0207235	0.0600547
hsa-miR-490-3p	MIMAT0002806	0.14496	4.41869	-3.38412	0.020805	0.0601334
hsa-miR-3132	MIMAT0014997	-0.751192	-4.40017	-3.39842	0.0210435	0.060366
hsa-miR-3168	MIMAT0015043	-0.940723	-4.39788	-3.4002	0.0210734	0.060366
hsa-miR-4439	MIMAT0018957	0.288908	4.39644	-3.40131	0.021092	0.060366
hsa-miR-3976	MIMAT0019361	0.17207	4.39442	-3.40288	0.0211184	0.060366
hsa-miR-1263	MIMAT0005915	-0.354003	-4.39138	-3.40523	0.0211581	0.060366
sv40-miR-S1-5p	MIMAT0003344	0.793301	4.38617	-3.40927	0.0212263	0.060405
hsa-miR-4286	MIMAT0016916	0.0709827	4.382	-3.4125	0.0212811	0.0604056
hsa-miR-4639-3p	MIMAT0019698	0.214788	4.36421	-3.42633	0.0215169	0.0609187
hsa-miR-3606	MIMAT0017983	0.266806	4.31689	-3.46332	0.022161	0.0625823
hsa-miR-627	MIMAT0003296	-0.117624	-4.29886	-3.4775	0.0224129	0.0629967
hsa-miR-890	MIMAT0004912	0.356766	4.29824	-3.47799	0.0224216	0.0629967
hsa-miR-4681	MIMAT0019766	0.131642	4.28013	-3.49228	0.0226786	0.0634649
hsa-miR-323b-5p	MIMAT0001630	-1.14148	-4.27843	-3.49362	0.0227029	0.0634649
hsa-miR-200b-5p	MIMAT0004571	0.535796	4.27092	-3.49955	0.0228106	0.0636053
hsa-miR-4317	MIMAT0016872	-0.382783	-4.24292	-3.52177	0.0232183	0.0645004
hsa-miR-181b-5p	MIMAT0000257	0.439422	4.2409	-3.52338	0.0232481	0.0645004
hsa-miR-635	MIMAT0003305	0.38348	4.21577	-3.54342	0.0236227	0.0653758
hsa-miR-936	MIMAT0004979	-0.232374	-4.20721	-3.55027	0.0237521	0.0655115
hsa-miR-107	MIMAT0000104	-0.149659	-4.20471	-3.55227	0.0237901	0.0655115
hsa-miR-101-3p	MIMAT0000099	-0.682454	-4.18927	-3.56465	0.0240262	0.0658634
hsa-miR-337-3p	MIMAT0000754	0.143107	4.1881	-3.56559	0.0240442	0.0658634
hsa-miR-4258	MIMAT0016879	0.060712	4.18472	-3.56831	0.0240964	0.0658634
hsa-miR-574-5p	MIMAT0004795	0.205914	4.17913	-3.5728	0.0241829	0.0659371
hsa-miR-4325	MIMAT0016887	0.11758	4.16469	-3.58443	0.0244084	0.0663883
hsa-miR-1284	MIMAT0005941	0.0798597	4.16025	-3.58801	0.0244781	0.066415
hsa-miR-3611	MIMAT0017988	0.0707552	4.14034	-3.60411	0.0247946	0.0666995
hsa-miR-4506	MIMAT0019042	1.20646	4.1374	-3.60649	0.0248418	0.0666995
hsa-miR-4800-3p	MIMAT0019979	0.2539	4.13397	-3.60927	0.0248969	0.0666995
hsa-miR-4742-3p	MIMAT0019873	-0.131766	-4.12237	-3.61869	0.0250848	0.0666995
hsa-miR-221-3p	MIMAT0000278	0.161216	4.11913	-3.62133	0.0251376	0.0666995
hsa-miR-508-3p	MIMAT0002880	0.20767	4.11875	-3.62163	0.0251437	0.0666995
hsa-miR-1264	MIMAT0005791	0.712832	4.11535	-3.6244	0.0251993	0.0666995
hsa-miR-518d-5p/hsa-miR-520c-5p/hsa-miR-526a		0.0572539	4.11391	-3.62557	0.0252229	0.0666995
kshv-miR-K12-10a	MIMAT0002179	0.0555394	4.10963	-3.62906	0.0252932	0.0666995
hsa-miR-4716-3p	MIMAT0019827	-0.237183	-4.10862	-3.62988	0.0253097	0.0666995
hsa-miR-21-5p	MIMAT0000076	0.318523	4.10811	-3.6303	0.0253181	0.0666995
hsa-miR-4298	MIMAT0016852	-0.481244	-4.10442	-3.6333	0.0253789	0.0666995
hsa-miR-4451	MIMAT0018973	0.543852	4.10267	-3.63473	0.0254079	0.0666995
hsa-miR-4453	MIMAT0018975	0.066136	4.10154	-3.63565	0.0254266	0.0666995
hsa-miR-877-5p	MIMAT0004949	-0.304683	-4.07373	-3.65839	0.0258923	0.0677606
hsa-miR-411-3p	MIMAT0004813	0.173124	4.05678	-3.67231	0.0261816	0.0683561
hsa-miR-4490	MIMAT0019025	-0.0589212	-4.05179	-3.67641	0.0262674	0.068419
hsa-miR-296-3p	MIMAT0004679	0.102877	4.04309	-3.68358	0.0264181	0.0686498
hsa-miR-4682	MIMAT0019767	0.0671196	4.03713	-3.68849	0.026522	0.0687461
hsa-miR-4791	MIMAT0019963	0.418907	4.03386	-3.6912	0.0265793	0.0687461
kshv-miR-K12-6-3p	MIMAT0002189	0.468973	4.022	-3.701	0.0267882	0.0690716
hsa-miR-1323	MIMAT0005795	0.0690473	4.01766	-3.70459	0.026865	0.0690716
hsa-let-7a-5p	MIMAT0000062	0.20363	4.01612	-3.70586	0.0268924	0.0690716
hsa-miR-4520b-3p	MIMAT0020300	-0.0750952	-4.00966	-3.71122	0.0270076	0.0691377
SNORD110		0.424905	4.00768	-3.71286	0.027043	0.0691377
hsa-miR-4723-3p	MIMAT0019839	0.0585681	4.00297	-3.71677	0.0271276	0.0691795
hsa-miR-675-5p	MIMAT0004284	0.245315	3.99689	-3.72182	0.0272373	0.0691795
hsa-miR-23a-3p	MIMAT0000078	0.12754	3.99175	-3.72609	0.0273303	0.0691795
hsa-miR-625-3p	MIMAT0004808	0.0529034	3.99127	-3.7265	0.0273392	0.0691795
spike_control_v2_27		0.387716	3.98708	-3.72998	0.0274154	0.0691795
hsa-miR-550a-3p	MIMAT0003257	0.152458	3.98604	-3.73085	0.0274343	0.0691795
hsa-miR-4299	MIMAT0016851	0.195362	3.97314	-3.7416	0.027671	0.0696178
spike_control_v2_6		0.194413	3.96599	-3.74758	0.0278034	0.0697922
hsa-miR-181d	MIMAT0002821	0.563252	3.9554	-3.75643	0.0280008	0.0700471
spike_control_v2_44		0.261523	3.95225	-3.75907	0.0280599	0.0700471
hsa-miR-92a-1-5p	MIMAT0004507	0.139682	3.95039	-3.76063	0.0280948	0.0700471
hsa-miR-4312	MIMAT0016864	0.0621666	3.94126	-3.76829	0.0282673	0.0702881
hsa-miR-4482-3p	MIMAT0020958	0.286954	3.93776	-3.77123	0.0283337	0.0702881
hsa-miR-99b-5p	MIMAT0000689	0.372308	3.93523	-3.77335	0.0283819	0.0702881
hsa-miR-548at-5p	MIMAT0022277	-0.137478	-3.92841	-3.77909	0.0285123	0.0704535
hsa-miR-320b	MIMAT0005792	0.415072	3.9158	-3.78971	0.0287554	0.0708479
hsa-miR-3169	MIMAT0015044	-0.427554	-3.9135	-3.79165	0.0288	0.0708479
hsa-miR-548k	MIMAT0005882	-0.0858107	-3.89181	-3.80998	0.029225	0.071734
hsa-miR-1255b-2-3p	MIMAT0022725	0.0991852	3.87929	-3.8206	0.0294742	0.0721857
spike_control_v2_33		0.318834	3.87279	-3.82612	0.0296044	0.0723446
hsa-miR-1587	MIMAT0019077	0.218635	3.86546	-3.83236	0.0297525	0.0725463
hsa-miR-4255	MIMAT0016885	-1.2868	-3.8476	-3.84758	0.0301168	0.0730513
hsa-miR-200c-3p	MIMAT0000617	0.0990918	3.84718	-3.84794	0.0301255	0.0730513
hsa-miR-155-5p	MIMAT0000646	0.0762818	3.84562	-3.84927	0.0301576	0.0730513
hsa-miR-3074-3p	MIMAT0015027	0.240879	3.83885	-3.85505	0.0302973	0.0732295
hsa-miR-371b-3p	MIMAT0019893	0.0532874	3.8322	-3.86075	0.0304355	0.0733573
hcmv-miR-US33-3p	MIMAT0004756	-0.354407	-3.82994	-3.86268	0.0304827	0.0733573
hsa-miR-296-5p	MIMAT0000690	0.0570509	3.8107	-3.87919	0.0308879	0.0741712
hsa-miR-550a-5p	MIMAT0004800	-1.50444	-3.78078	-3.90497	0.0315316	0.075553
hsa-miR-508-5p	MIMAT0004778	0.0768486	3.76742	-3.91654	0.0318247	0.0760905
hsa-miR-4795-5p	MIMAT0019968	0.476301	3.76237	-3.92091	0.0319362	0.0761927
hsa-miR-4426	MIMAT0018941	0.092991	3.73832	-3.94181	0.032475	0.0773115
RNU1		0.0522454	3.72414	-3.95417	0.0327979	0.0779126
hsa-miR-4743	MIMAT0019874	0.237888	3.71627	-3.96104	0.032979	0.078175
hsv1-miR-H4-3p	MIMAT0008402	0.119713	3.70675	-3.96938	0.0331998	0.0785302
hsa-miR-378f	MIMAT0018932	-0.105517	-3.68842	-3.98546	0.0336302	0.0791592
spike_control_v2_36		0.128704	3.68625	-3.98737	0.0336816	0.0791592
hsa-miR-550b-2-5p	MIMAT0022737	-1.10884	-3.68397	-3.98937	0.0337357	0.0791592
hsa-miR-4777-5p	MIMAT0019934	0.266252	3.68329	-3.98996	0.0337517	0.0791592
ebv-miR-BART8*	MIMAT0003418	0.236084	3.67612	-3.99628	0.0339229	0.0793926
hsa-miR-378b	MIMAT0014999	-0.11151	-3.66116	-4.00947	0.0342834	0.080045
hsa-miR-638	MIMAT0003308	0.192753	3.65857	-4.01176	0.0343463	0.080045
hsa-miR-202-3p	MIMAT0002811	0.0945032	3.64469	-4.02404	0.0346858	0.0806664
hsa-miR-1273g-3p	MIMAT0022742	0.0698109	3.6312	-4.03599	0.0350199	0.0812725
hsa-miR-4683	MIMAT0019768	0.0793143	3.61373	-4.05153	0.0354587	0.0820522
hsa-miR-2115-5p	MIMAT0011158	0.0539596	3.61194	-4.05312	0.0355041	0.0820522
hsv2-miR-H3	MIMAT0010202	-0.488128	-3.6087	-4.05601	0.0355865	0.0820713
hsa-miR-423-3p	MIMAT0001340	0.284492	3.59262	-4.07037	0.0359986	0.0828491
hsa-miR-514b-5p	MIMAT0015087	-0.0626875	-3.58787	-4.07462	0.0361214	0.0829593
hsa-miR-4540	MIMAT0019083	0.272079	3.57148	-4.0893	0.0365494	0.0834406
hsa-miR-3690	MIMAT0018119	-0.34038	-3.5702	-4.09046	0.0365832	0.0834406
hsa-miR-5186	MIMAT0021116	-0.147494	-3.56864	-4.09185	0.0366242	0.0834406
hsa-miR-1273e	MIMAT0018079	-0.329857	-3.56833	-4.09213	0.0366324	0.0834406
hsa-miR-497-5p	MIMAT0002820	0.118374	3.56065	-4.09903	0.0368357	0.0836503
hsa-miR-636	MIMAT0003306	-0.217781	-3.5585	-4.10097	0.036893	0.0836503
hsa-miR-4766-5p	MIMAT0019917	-0.052334	-3.55632	-4.10293	0.0369512	0.0836503
hsa-miR-642a-3p	MIMAT0020924	-0.0901784	-3.55053	-4.10815	0.0371061	0.0838296
hsa-miR-513a-5p	MIMAT0002877	0.191495	3.54433	-4.11373	0.0372727	0.0840344
hsa-miR-3664-5p	MIMAT0018086	-0.0505771	-3.52421	-4.13191	0.0378207	0.0850967
hsa-miRPlus-A1015		0.29449	3.51918	-4.13646	0.0379591	0.0852347
hsv2-miR-H9-3p	MIMAT0014352	0.078625	3.49821	-4.15549	0.0385437	0.0863723
hsa-miR-551a	MIMAT0003214	0.0577545	3.49109	-4.16198	0.0387449	0.0864453
hsa-miR-103a-3p	MIMAT0000101	-0.219872	-3.49009	-4.16288	0.0387732	0.0864453
hsa-miR-302b-5p	MIMAT0000714	-0.121132	-3.48878	-4.16408	0.0388106	0.0864453
hsa-miR-146b-5p	MIMAT0002809	-0.103739	-3.48559	-4.16698	0.0389011	0.0864729
hsa-miR-544b	MIMAT0015004	0.0749407	3.481	-4.17117	0.0390321	0.0865903
spike_control_v2_39		0.376306	3.44779	-4.20156	0.039997	0.0883379
hsa-miR-5694	MIMAT0022487	0.27333	3.4461	-4.20311	0.0400467	0.0883379
hsa-miR-3135b	MIMAT0018985	-0.127498	-3.44568	-4.2035	0.0400593	0.0883379
hsa-miR-4654	MIMAT0019720	0.599894	3.43714	-4.21134	0.0403127	0.0886425
spike_control_v2_50		0.274322	3.43564	-4.21272	0.0403576	0.0886425
hsa-miR-1291	MIMAT0005881	0.0737151	3.42474	-4.22276	0.0406845	0.0891836
hsa-miR-3529-3p	MIMAT0022741	-0.0465296	-3.4206	-4.22657	0.0408095	0.0892414
hsa-miR-509-5p	MIMAT0004779	0.0603126	3.41767	-4.22928	0.0408984	0.0892414
hsa-miR-143-3p	MIMAT0000435	0.248725	3.41588	-4.23093	0.0409527	0.0892414
hsa-miR-5000-3p	MIMAT0021020	0.0896529	3.40822	-4.238	0.0411863	0.0895454
hsa-miR-487b	MIMAT0003180	0.0616182	3.40428	-4.24164	0.0413072	0.0895454
hsa-miRPlus-J1003		0.0475694	3.40338	-4.24248	0.0413349	0.0895454
hsa-miR-5007-3p	MIMAT0021036	0.148455	3.39469	-4.25052	0.0416031	0.0899505
mcv-miR-M1-3p	MIMAT0010151	-0.0588189	-3.3888	-4.25598	0.0417863	0.0901704
hsa-miR-4748	MIMAT0019884	0.130958	3.37775	-4.26624	0.0421327	0.0907411
hsa-miR-1204	MIMAT0005868	0.051744	3.37038	-4.2731	0.0423659	0.0910661
hsa-miR-4677-5p	MIMAT0019760	-0.181945	-3.3456	-4.2962	0.0431614	0.0925963
hsa-miR-5002-5p	MIMAT0021023	0.454379	3.34271	-4.2989	0.0432554	0.092617
hsa-miR-3911	MIMAT0018185	-0.120099	-3.33834	-4.30299	0.0433981	0.092617
hsa-miR-3679-5p	MIMAT0018104	-0.0868273	-3.33761	-4.30368	0.043422	0.092617
hsa-miR-483-5p	MIMAT0004761	-0.447715	-3.32207	-4.31824	0.0439343	0.0935294
hsa-miR-4695-3p	MIMAT0019789	0.111372	3.31666	-4.32332	0.0441146	0.0937328
hsa-miR-4450	MIMAT0018971	0.165385	3.31007	-4.32952	0.0443353	0.0940215
hsa-miR-4420	MIMAT0018933	0.109573	3.30131	-4.33776	0.0446309	0.0944674
hsa-miR-182-5p	MIMAT0000259	-0.171361	-3.2851	-4.35306	0.0451847	0.0949367
hsa-miR-4729	MIMAT0019851	-0.0664777	-3.28493	-4.35322	0.0451905	0.0949367
hsa-miR-4679	MIMAT0019763	-0.0526624	-3.27899	-4.35884	0.0453958	0.0949367
hsa-miR-4760-5p	MIMAT0019906	-0.0517168	-3.27715	-4.36057	0.0454593	0.0949367
hsa-miRPlus-G1065-5p		-0.0488442	-3.27701	-4.36071	0.0454644	0.0949367
hsa-miR-548ac	MIMAT0018938	0.0469693	3.27414	-4.36342	0.045564	0.0949367
hsa-miR-126-3p	MIMAT0000445	-0.145133	-3.27368	-4.36386	0.0455799	0.0949367
hsa-miR-4311	MIMAT0016863	0.0494269	3.27326	-4.36426	0.0455946	0.0949367
hsa-miR-630	MIMAT0003299	0.131806	3.27221	-4.36525	0.0456311	0.0949367
SNORD44		0.123232	3.26994	-4.3674	0.0457103	0.0949367
hsa-miR-146a-5p	MIMAT0000449	-0.0574099	-3.26076	-4.37611	0.0460326	0.0954271
hsa-miR-3184-3p	MIMAT0022731	0.0475359	3.25185	-4.38457	0.0463478	0.095901
hsa-miR-3138	MIMAT0015006	-1.06965	-3.24646	-4.3897	0.0465399	0.0959632
hsa-miR-4688	MIMAT0019777	-0.0615786	-3.24614	-4.39	0.0465512	0.0959632
hsa-miR-548t-5p	MIMAT0015009	0.069201	3.23848	-4.39729	0.0468261	0.0962329
hsa-miR-149-3p	MIMAT0004609	0.436313	3.23765	-4.39808	0.046856	0.0962329
hsa-miR-4657	MIMAT0019724	0.622239	3.21554	-4.41919	0.0476613	0.0972763
hsa-miR-744-5p	MIMAT0004945	0.0612577	3.21541	-4.41932	0.047666	0.0972763
hsa-miR-4722-5p	MIMAT0019836	0.0493794	3.2145	-4.42018	0.0476995	0.0972763
hsa-miR-3199	MIMAT0015084	-0.815494	-3.21407	-4.4206	0.0477155	0.0972763
hsa-miR-19b-3p	MIMAT0000074	-0.249152	-3.20573	-4.42858	0.0480241	0.0977254
hsa-miR-553	MIMAT0003216	0.0814121	3.19921	-4.43484	0.0482673	0.0979211
hsa-miR-4739	MIMAT0019868	-0.976798	-3.19841	-4.4356	0.0482971	0.0979211
hsa-miR-33a-5p	MIMAT0000091	0.0960252	3.19157	-4.44217	0.048554	0.0979696
hsa-miR-4650-3p	MIMAT0019714	0.0444413	3.19089	-4.44282	0.0485796	0.0979696
hsa-miR-1293	MIMAT0005883	-0.311462	-3.19071	-4.443	0.0485866	0.0979696
hsa-miR-4505	MIMAT0019041	0.200349	3.17793	-4.45529	0.0490714	0.0987674
hsa-miR-4328	MIMAT0016926	0.129175	3.17534	-4.45779	0.0491708	0.0987878
spike_control_v2_15		0.124728	3.15697	-4.47551	0.0498805	0.100032
hsa-miR-658	MIMAT0003336	0.279563	3.15404	-4.47834	0.0499948	0.10008
hsa-miR-338-3p	MIMAT0000763	0.112932	3.14643	-4.48571	0.0502935	0.100496
hsa-miR-5197-5p	MIMAT0021130	0.0769923	3.14288	-4.48914	0.0504334	0.100594
hsa-miR-1302	MIMAT0005890	-0.0697787	-3.14039	-4.49156	0.0505321	0.10061
hsa-miR-4714-5p	MIMAT0019822	0.0872304	3.12742	-4.50414	0.051049	0.101456
hsa-miR-4461	MIMAT0018983	0.20778	3.11826	-4.51305	0.0514183	0.102007
hsa-miR-195-3p	MIMAT0004615	0.0628469	3.11557	-4.51567	0.0515276	0.102041
hsa-miR-301a-5p	MIMAT0022696	-0.0568115	-3.10976	-4.52133	0.0517642	0.102327
hsa-miR-3135a	MIMAT0015001	0.156267	3.10299	-4.52793	0.0520416	0.102692
hsa-miR-601	MIMAT0003269	-0.219945	-3.06987	-4.56034	0.0534259	0.105236
kshv-miR-K12-3*	MIMAT0002194	-0.15421	-3.05101	-4.57888	0.0542351	0.10664
hsa-miR-4695-5p	MIMAT0019788	0.0574601	3.03464	-4.59502	0.0549497	0.107853
hsa-miR-486-3p	MIMAT0004762	-0.13472	-3.02873	-4.60086	0.0552106	0.108174
hsa-miR-1915-5p	MIMAT0007891	-0.089069	-3.01763	-4.61184	0.0557047	0.108949
hsa-miR-5088	MIMAT0021080	0.0714602	3.01178	-4.61764	0.0559677	0.10927
hsa-miR-4257	MIMAT0016878	0.068566	3.00822	-4.62117	0.0561279	0.10939
hsa-miR-5588-5p	MIMAT0022295	0.225491	2.99291	-4.63638	0.0568257	0.110451
hsa-miR-4511	MIMAT0019048	-0.0913886	-2.9919	-4.63738	0.0568719	0.110451
hsa-miRPlus-D1058		0.0406345	2.98136	-4.64787	0.0573585	0.111121
spike_control_v2_32		0.325714	2.97987	-4.64936	0.0574281	0.111121
hsa-miR-29c-3p	MIMAT0000681	0.276754	2.97793	-4.65129	0.0575181	0.111121
hsa-miR-3128	MIMAT0014991	-0.148459	-2.97532	-4.6539	0.0576403	0.111163
hsa-miR-4481	MIMAT0019015	0.090101	2.96299	-4.66621	0.05822	0.112071
hsa-miR-5588-3p	MIMAT0022296	-0.712583	-2.96102	-4.66818	0.0583131	0.112071
hsa-miRPlus-C1100		-0.157169	-2.94754	-4.68167	0.0589565	0.113111
hsv1-miR-H6-5p	MIMAT0015281	0.0533216	2.94346	-4.68577	0.0591532	0.113243
hsa-miR-3202	MIMAT0015089	0.121333	2.94186	-4.68737	0.0592302	0.113243
hsa-miR-4303	MIMAT0016856	0.0670056	2.93349	-4.69577	0.0596364	0.113823
hsa-miR-4471	MIMAT0018998	-0.0395601	-2.91542	-4.71396	0.0605258	0.115322
hsa-miR-4477a	MIMAT0019004	0.0577204	2.90231	-4.72719	0.0611814	0.116371
hsa-miR-539-3p	MIMAT0022705	-0.0396903	-2.89834	-4.73119	0.0613815	0.116551
hsa-miR-302a-3p	MIMAT0000684	0.151099	2.89019	-4.73944	0.0617952	0.117136
hsa-miR-4750	MIMAT0019887	0.278203	2.88096	-4.74879	0.0622677	0.11783
hsa-miR-885-3p	MIMAT0004948	0.0987848	2.87269	-4.75717	0.062695	0.118266
hsa-miR-4753-5p	MIMAT0019890	-0.0448505	-2.87236	-4.75751	0.0627122	0.118266
hsa-miR-4774-3p	MIMAT0019930	0.088779	2.86645	-4.76351	0.0630198	0.118394
hsa-miR-140-3p	MIMAT0004597	-0.222823	-2.86552	-4.76446	0.0630683	0.118394
hsa-miR-626	MIMAT0003295	0.0687094	2.8649	-4.76508	0.0631006	0.118394
hsa-miR-3676-3p	MIMAT0018100	0.0394385	2.84714	-4.78316	0.0640383	0.11995
spike_control_v2_34		0.414173	2.84021	-4.79023	0.0644086	0.12044
hsa-miR-3667-5p	MIMAT0018089	0.236256	2.83357	-4.79701	0.0647659	0.120904
hsa-miR-1322	MIMAT0005953	0.0398119	2.81978	-4.81112	0.0655166	0.122099
hsa-miR-4291	MIMAT0016922	0.0823314	2.8145	-4.81652	0.0658066	0.122433
hsa-miR-4999-5p	MIMAT0021017	-0.0651738	-2.8028	-4.82853	0.0664554	0.123433
hsa-miR-760	MIMAT0004957	0.0416723	2.79539	-4.83613	0.0668699	0.123995
hsa-miR-4476	MIMAT0019003	-0.0683179	-2.79025	-4.84142	0.0671596	0.124324
hsa-miR-506-5p	MIMAT0022701	-0.038866	-2.78318	-4.8487	0.0675608	0.124858
hsa-miR-4458	MIMAT0018980	0.0490285	2.77162	-4.86062	0.0682229	0.125871
hsa-miR-769-5p	MIMAT0003886	0.0390374	2.76854	-4.8638	0.0684004	0.125989
hsa-miR-3150b-3p	MIMAT0018194	-0.0926888	-2.76416	-4.86833	0.0686546	0.126247
hsa-miR-328	MIMAT0000752	0.0936147	2.75519	-4.8776	0.0691775	0.126998
hsa-miR-629-5p	MIMAT0004810	-1.12811	-2.75185	-4.88106	0.0693739	0.127147
hsa-miR-4655-5p	MIMAT0019721	-0.0751044	-2.7417	-4.89158	0.0699744	0.128036
hsa-miR-5689	MIMAT0022481	0.0942454	2.7307	-4.903	0.070632	0.129026
hsa-miR-585	MIMAT0003250	0.307625	2.72399	-4.90997	0.0710368	0.129551
hsa-miR-506-3p	MIMAT0002878	0.108809	2.71612	-4.91816	0.0715156	0.13021
hsa-miR-548ap-5p/hsa-miR-548j		0.189	2.7139	-4.92047	0.0716514	0.130243
hsa-miR-4673	MIMAT0019755	0.036496	2.69744	-4.93764	0.0726681	0.131664
hsa-miR-3180-5p	MIMAT0015057	0.0380484	2.6974	-4.93769	0.0726708	0.131664
hsa-miR-4300	MIMAT0016853	0.0499266	2.693	-4.94229	0.0729454	0.131945
hsa-miR-548b-5p	MIMAT0004798	0.115123	2.68622	-4.94937	0.0733712	0.132322
hsa-miR-3621	MIMAT0018002	0.0917018	2.68521	-4.95043	0.0734349	0.132322
ebv-miR-BHRF1-1	MIMAT0000995	0.0560829	2.68399	-4.95171	0.0735122	0.132322
spike_control_v2_3		0.388443	2.67573	-4.96036	0.0740361	0.133049
hsa-miR-22-5p	MIMAT0004495	-0.109652	-2.6653	-4.9713	0.0747048	0.134033
hsa-miR-891a	MIMAT0004902	0.335597	2.65597	-4.9811	0.075309	0.1347
hsa-miR-4491	MIMAT0019026	-0.0442332	-2.6558	-4.98128	0.0753201	0.1347
hsa-miR-3156-3p	MIMAT0019209	-0.11042	-2.6539	-4.98327	0.0754437	0.134704
hsa-let-7i-3p	MIMAT0004585	-0.0619358	-2.65133	-4.98598	0.0756121	0.134787
spike_control_v2_35		0.0506983	2.64433	-4.99335	0.0760716	0.135388
hsa-miR-892a	MIMAT0004907	0.0431731	2.63201	-5.00634	0.0768892	0.136623
hsa-miR-302c-5p	MIMAT0000716	0.0549645	2.62986	-5.00861	0.0770329	0.136659
hsa-miR-1299	MIMAT0005887	-0.0565352	-2.62117	-5.01779	0.0776174	0.137278
hsa-miR-206	MIMAT0000462	-0.0900271	-2.61866	-5.02044	0.0777871	0.137278
hsa-miR-4694-5p	MIMAT0019786	0.0985157	2.61756	-5.0216	0.0778613	0.137278
hsa-miR-3122	MIMAT0014984	0.0884212	2.61698	-5.02222	0.0779011	0.137278
hsa-miR-2113	MIMAT0009206	0.118425	2.61387	-5.0255	0.078112	0.137278
hsa-miR-4262	MIMAT0016894	-0.197964	-2.61367	-5.02571	0.0781256	0.137278
hsa-miR-4279	MIMAT0016909	0.0381772	2.61007	-5.02952	0.0783712	0.137303
hsa-miR-4728-5p	MIMAT0019849	-0.307116	-2.60983	-5.02978	0.0783877	0.137303
hsa-miR-3913-5p	MIMAT0018187	-0.0457886	-2.59342	-5.04717	0.0795199	0.139066
hsa-miR-593-3p	MIMAT0004802	-0.103652	-2.59064	-5.05012	0.0797136	0.139184
SNORD38B		0.0921621	2.55564	-5.08739	0.0822039	0.143307
hsa-miR-138-2-3p	MIMAT0004596	0.0441854	2.5433	-5.10057	0.0831042	0.144648
spike_control_v2_45		0.286644	2.53977	-5.10435	0.0833644	0.144873
kshv-miR-K12-10b	MIMAT0002180	0.0412819	2.52373	-5.12153	0.0845573	0.146716
hsa-miR-3148	MIMAT0015021	0.0676	2.52111	-5.12435	0.0847544	0.146762
hsa-miR-142-5p	MIMAT0000433	-0.291622	-2.51986	-5.12569	0.0848486	0.146762
hsa-miR-1470	MIMAT0007348	0.0330247	2.51108	-5.13512	0.0855135	0.147484
hsa-miR-3152-5p	MIMAT0019207	0.150474	2.51082	-5.13539	0.0855329	0.147484
hsa-miRPlus-C1099		-0.05682	-2.4897	-5.15811	0.0871585	0.150054
hsa-miR-451b	MIMAT0019840	-0.143213	-2.47769	-5.17108	0.0881005	0.15144
hsa-miR-4764-3p	MIMAT0019915	0.172857	2.46921	-5.18023	0.0887722	0.152062
hsa-miR-3941	MIMAT0018357	-0.198277	-2.46826	-5.18126	0.0888482	0.152062
hsa-miR-4781-5p	MIMAT0019942	-0.0487739	-2.46793	-5.18162	0.0888743	0.152062
hsa-miR-4804-3p	MIMAT0019985	0.0542837	2.46399	-5.18588	0.0891896	0.152366
hsa-miR-548aa/hsa-miR-548t-3p		-0.306514	-2.45785	-5.19252	0.0896823	0.152971
hsa-miR-92a-2-5p	MIMAT0004508	0.0497068	2.45562	-5.19494	0.089863	0.153044
hsa-miR-642b-3p	MIMAT0018444	-0.180145	-2.44373	-5.20782	0.0908297	0.154452
hsa-miR-941	MIMAT0004984	0.0325097	2.44196	-5.20974	0.0909748	0.154462
hsa-miR-5690	MIMAT0022482	0.0373145	2.42992	-5.22282	0.0919694	0.155911
hsa-miR-18b-3p	MIMAT0004751	0.0351989	2.42426	-5.22898	0.0924417	0.156472
hsa-miR-943	MIMAT0004986	0.0680827	2.41713	-5.23673	0.0930398	0.157244
hsa-miR-5010-3p	MIMAT0021044	0.0367391	2.4101	-5.24439	0.093635	0.158009
hsa-miR-432-5p	MIMAT0002814	-0.0681119	-2.39984	-5.25558	0.0945119	0.159126
spike_control_v2_28		0.214724	2.39821	-5.25736	0.0946524	0.159126
hsa-miR-1	MIMAT0000416	0.407506	2.39733	-5.25832	0.0947279	0.159126
hsa-miR-1183	MIMAT0005828	0.0316239	2.38528	-5.27148	0.0957729	0.160403
hsa-let-7i-5p	MIMAT0000415	0.985586	2.38522	-5.27155	0.0957782	0.160403
hsa-miR-552	MIMAT0003215	0.108482	2.3835	-5.27343	0.095929	0.160413
hsa-miR-1265	MIMAT0005918	-0.0726103	-2.38136	-5.27577	0.0961162	0.160484
hsa-miR-5704	MIMAT0022498	0.169243	2.36415	-5.29462	0.0976398	0.162782
hsa-miR-365a-5p/hsa-miR-365b-5p		0.0329499	2.34246	-5.31844	0.0996026	0.165805
hsa-miR-4297	MIMAT0016846	-0.0371811	-2.31815	-5.3452	0.101859	0.169266
hsa-miR-122-5p	MIMAT0000421	0.0307245	2.31678	-5.34671	0.101988	0.169266
hsa-miR-935	MIMAT0004978	0.135524	2.30949	-5.35476	0.102678	0.170156
hsa-miR-4287	MIMAT0016917	0.0380441	2.30631	-5.35827	0.10298	0.170184
hsa-miR-3064-5p	MIMAT0019864	0.0453943	2.30608	-5.35853	0.103002	0.170184
hsa-miR-190b	MIMAT0004929	0.0397503	2.2985	-5.3669	0.103728	0.171128
hsv1-miR-H6-3p	MIMAT0008404	0.0676722	2.28441	-5.38249	0.105093	0.173123
hsa-miR-1270	MIMAT0005924	0.0942484	2.2794	-5.38805	0.105585	0.173674
hsa-miR-196a-3p	MIMAT0004562	0.0794731	2.27484	-5.3931	0.106034	0.174153
hsa-miR-4646-5p	MIMAT0019707	-0.454079	-2.26745	-5.40129	0.106766	0.174883
hsa-miR-299-5p	MIMAT0002890	0.0495215	2.26718	-5.4016	0.106794	0.174883
hcmv-miR-US25-2-5p	MIMAT0001582	-0.0347901	-2.23674	-5.43543	0.109877	0.179666
hsa-miR-4776-3p	MIMAT0019933	0.030541	2.23163	-5.44113	0.110406	0.180264
hsa-miR-4513	MIMAT0019050	0.115885	2.21856	-5.4557	0.11177	0.182223
hsa-miR-576-3p	MIMAT0004796	0.234593	2.21531	-5.45933	0.112113	0.182514
hsa-miR-4797-5p	MIMAT0019972	-0.0307791	-2.21204	-5.46298	0.112459	0.182807
hsa-miR-4755-3p	MIMAT0019896	0.0374106	2.19988	-5.47657	0.113756	0.184645
spike_control_v2_52		-0.044759	-2.18063	-5.49811	0.115846	0.187763
hsa-miR-375	MIMAT0000728	0.0323758	2.17642	-5.50283	0.11631	0.188238
hsa-miR-493-5p	MIMAT0002813	0.0494965	2.17212	-5.50766	0.116786	0.188732
hsa-miR-494	MIMAT0002816	-0.034521	-2.16379	-5.51701	0.117714	0.189955
SNORD12		0.152219	2.16013	-5.52112	0.118124	0.19034
hcmv-miR-UL36	MIMAT0001576	0.113479	2.15287	-5.52927	0.118943	0.191272
hsa-miR-383	MIMAT0000738	0.0647797	2.15164	-5.53065	0.119083	0.191272
hsa-miR-382-3p	MIMAT0022697	0.029587	2.15042	-5.53202	0.119221	0.191272
hsa-miR-548aa/hsa-miR-548ap-3p/hsa-miR-548t-3p		0.0484194	2.14658	-5.53634	0.119658	0.191695
hsa-miR-645	MIMAT0003315	0.0376881	2.14377	-5.5395	0.11998	0.191933
hsa-miR-4473	MIMAT0019000	0.0299879	2.13039	-5.55456	0.121523	0.194121
hsa-miR-4327	MIMAT0016889	0.0418257	2.1277	-5.55759	0.121836	0.194316
hsa-miR-186-5p	MIMAT0000456	0.0587086	2.12633	-5.55914	0.121996	0.194316
hsa-miR-4503	MIMAT0019039	0.0470221	2.12244	-5.56352	0.122451	0.194761
spike_control_v2_24		0.295858	2.11832	-5.56816	0.122936	0.195251
hsa-miRPlus-G1246-3p		0.028731	2.11594	-5.57085	0.123217	0.195417
hsa-miR-338-5p	MIMAT0004701	0.0502545	2.11401	-5.57302	0.123445	0.195498
hsa-miR-3935	MIMAT0018350	0.0294643	2.10753	-5.58033	0.124215	0.196437
hsa-miR-5590-5p	MIMAT0022299	-0.0446538	-2.10562	-5.58249	0.124443	0.196517
hsv1-miR-H2	MIMAT0008399	0.0524091	2.09835	-5.5907	0.125315	0.197612
hsa-miR-3124-3p	MIMAT0019200	0.0662749	2.0934	-5.5963	0.125914	0.198275
hsa-miR-4666a-3p	MIMAT0019742	-0.167875	-2.09145	-5.5985	0.126151	0.198342
hsa-miR-450a-3p	MIMAT0022700	0.0364221	2.08878	-5.60151	0.126475	0.198342
Hy3		-0.184701	-2.08863	-5.60169	0.126494	0.198342
hsa-miR-31-5p	MIMAT0000089	-0.147379	-2.08402	-5.6069	0.127057	0.198942
hsa-miR-425-5p	MIMAT0003393	-0.0778421	-2.0738	-5.61847	0.128317	0.200632
ebv-miR-BART18-3p	MIMAT0004835	0.0529792	2.05609	-5.63853	0.130535	0.203811
hsa-miR-4306	MIMAT0016858	0.107301	2.0453	-5.65077	0.131908	0.205665
hsa-miR-660-3p	MIMAT0022711	-0.0518889	-2.00323	-5.6986	0.137429	0.213972
SNORD65		-0.0292219	-1.99246	-5.71087	0.138886	0.215936
hsa-miR-4778-5p	MIMAT0019936	-0.0414454	-1.98731	-5.71673	0.139588	0.216723
hsa-miR-4423-5p	MIMAT0019232	-0.0615342	-1.97936	-5.7258	0.140681	0.218075
hsa-miR-501-5p	MIMAT0002872	0.0347279	1.97775	-5.72763	0.140904	0.218075
hsa-miR-4687-5p	MIMAT0019774	0.0267467	1.9767	-5.72883	0.141049	0.218075
hsa-miR-499a-3p	MIMAT0004772	-0.0346667	-1.9678	-5.73899	0.142289	0.219685
hsa-miR-4749-3p	MIMAT0019886	0.0346972	1.96301	-5.74446	0.142962	0.220416
hsa-miR-3194-3p	MIMAT0019218	-0.0280085	-1.95667	-5.75169	0.143857	0.221488
hsa-miR-20b-3p	MIMAT0004752	0.112911	1.94467	-5.76541	0.145571	0.223816
hsa-miR-365a-3p/hsa-miR-365b-3p		0.0284702	1.92285	-5.79036	0.148748	0.228383
hsa-miR-668	MIMAT0003881	0.032288	1.91551	-5.79877	0.149835	0.229734
hsa-miR-3150b-5p	MIMAT0019226	0.0429299	1.9063	-5.80931	0.151211	0.231523
hsa-miR-5193	MIMAT0021124	-0.0499109	-1.89341	-5.82409	0.153164	0.234188
hsa-miR-455-3p	MIMAT0004784	-0.0283683	-1.89023	-5.82773	0.15365	0.234607
hsa-miR-3714	MIMAT0018165	0.0256859	1.88729	-5.8311	0.1541	0.234971
hsa-miR-3614-5p	MIMAT0017992	0.0342395	1.87501	-5.84518	0.156	0.237164
hsa-miR-224-3p	MIMAT0009198	0.10888	1.87438	-5.84591	0.156099	0.237164
hsa-miR-30c-1-3p	MIMAT0004674	0.0584844	1.87385	-5.84651	0.156181	0.237164
hsa-miR-5004-5p	MIMAT0021027	-0.0329456	-1.87169	-5.849	0.156519	0.237352
hsa-miR-4659b-3p	MIMAT0019734	-0.0252356	-1.86159	-5.86058	0.158108	0.239372
hsa-miR-548e	MIMAT0005874	0.044086	1.85929	-5.86323	0.158472	0.239372
hsa-miR-422a	MIMAT0001339	0.0298308	1.85912	-5.86342	0.1585	0.239372
hsa-miR-2964a-5p	MIMAT0019747	-0.0263566	-1.85366	-5.86969	0.159369	0.240292
hsa-miR-148b-3p	MIMAT0000759	0.026748	1.85256	-5.87095	0.159544	0.240292
hsa-miR-4700-3p	MIMAT0019797	0.028339	1.85075	-5.87303	0.159834	0.240403
hsa-miR-5579-5p	MIMAT0022269	-0.0336811	-1.83194	-5.89463	0.162881	0.244448
hsa-miR-940	MIMAT0004983	0.0258421	1.83143	-5.89522	0.162966	0.244448
hsa-miR-4703-3p	MIMAT0019802	-0.209045	-1.8256	-5.90192	0.163924	0.245369
hsa-miR-4329	MIMAT0016923	0.0300293	1.825	-5.9026	0.164022	0.245369
hsa-miR-5580-5p	MIMAT0022273	0.0340594	1.81601	-5.91294	0.165515	0.247268
hsa-miR-596	MIMAT0003264	0.042104	1.8125	-5.91698	0.166103	0.24761
hsa-miR-4723-5p	MIMAT0019838	-0.0565405	-1.8115	-5.91813	0.16627	0.24761
hsa-miR-4454	MIMAT0018976	0.0985353	1.81063	-5.91912	0.166415	0.24761
spike_control_v2_31		0.154644	1.8041	-5.92664	0.167516	0.248914
hsa-miR-10a-3p	MIMAT0004555	-0.0682647	-1.79351	-5.93881	0.169318	0.251254
hsa-miR-145-3p	MIMAT0004601	0.0359471	1.78038	-5.95392	0.171584	0.254276
jcv-miR-J1-5p	MIMAT0009147	-0.0275361	-1.77541	-5.95963	0.172451	0.255218
hsa-miR-4459	MIMAT0018981	-0.347763	-1.7734	-5.96194	0.172802	0.255241
hsa-miR-191-5p	MIMAT0000440	-0.151359	-1.77269	-5.96276	0.172927	0.255241
ebv-miR-BART7*	MIMAT0004815	0.194172	1.7672	-5.96908	0.173893	0.256325
hsa-miR-4502	MIMAT0019038	0.0308918	1.76588	-5.9706	0.174127	0.256328
hsa-miR-4747-5p	MIMAT0019882	-0.0718189	-1.75948	-5.97796	0.175261	0.257655
hsa-miR-451a	MIMAT0001631	-0.250326	-1.75434	-5.98387	0.17618	0.258663
hsa-miR-30e-3p	MIMAT0000693	0.0349213	1.75258	-5.9859	0.176497	0.258784
hsa-miR-1225-5p	MIMAT0005572	0.0248228	1.74169	-5.99844	0.178465	0.261323
hsv1-miR-H8	MIMAT0012597	-0.046564	-1.74027	-6.00007	0.178723	0.261356
hsa-miR-942	MIMAT0004985	-0.0265489	-1.73784	-6.00286	0.179165	0.261657
hsa-miR-24-3p	MIMAT0000080	0.09819	1.73641	-6.00451	0.179428	0.261695
hsa-miR-4727-3p	MIMAT0019848	-0.0373233	-1.73247	-6.00905	0.180151	0.262404
hsa-miR-3121-5p	MIMAT0019199	-0.0745919	-1.72346	-6.01941	0.181815	0.26448
hsa-miR-1915-3p	MIMAT0007892	0.0232858	1.71398	-6.03032	0.183586	0.266705
hsa-miR-30e-5p	MIMAT0000692	0.207238	1.7124	-6.03214	0.183882	0.266786
hsa-miR-4710	MIMAT0019815	0.0286179	1.70834	-6.03681	0.184648	0.267547
hsa-miR-4787-3p	MIMAT0019957	0.0237231	1.68659	-6.06184	0.188812	0.272997
hsa-miR-1249	MIMAT0005901	0.0238222	1.6859	-6.06262	0.188944	0.272997
bkv-miR-B1-3p/jcv-miR-J1-3p		-0.112678	-1.68485	-6.06384	0.18915	0.272997
hsa-miR-342-3p	MIMAT0000753	-0.0257056	-1.68221	-6.06687	0.189661	0.273379
hsa-miR-1268b	MIMAT0018925	0.0357657	1.67931	-6.0702	0.190227	0.273839
hsa-miR-98	MIMAT0000096	0.16411	1.67489	-6.07529	0.191094	0.274401
hsa-miR-4735-5p	MIMAT0019860	0.128322	1.67479	-6.0754	0.191114	0.274401
hsa-miR-218-2-3p	MIMAT0004566	0.0545741	1.67321	-6.07722	0.191424	0.27449
hsv2-miR-H6	MIMAT0015651	-0.0248923	-1.66162	-6.09055	0.193723	0.277427
hsa-miR-3162-5p	MIMAT0015036	0.0223393	1.65989	-6.09253	0.194067	0.27756
hsa-miR-541-5p	MIMAT0004919	-0.0279564	-1.63663	-6.11928	0.198782	0.283937
hsa-miR-3121-3p	MIMAT0014983	0.0596372	1.63472	-6.12147	0.199174	0.284131
hsa-miR-1262	MIMAT0005914	-0.0329067	-1.6332	-6.12321	0.199487	0.284211
hsa-miR-1275	MIMAT0005929	-0.361267	-1.62883	-6.12823	0.20039	0.285131
spike_control_v2_20		0.0613878	1.62748	-6.12978	0.20067	0.285162
hsa-miR-4638-5p	MIMAT0019695	0.0226899	1.60345	-6.15736	0.205727	0.291975
hsa-miR-3915	MIMAT0018189	0.0871433	1.60044	-6.16082	0.206372	0.292514
hsa-miR-939	MIMAT0004982	0.0233	1.5973	-6.16442	0.207045	0.293093
hsa-miR-27b-3p	MIMAT0000419	0.029684	1.59454	-6.16759	0.20764	0.293561
hsa-let-7d-3p	MIMAT0004484	0.0828224	1.5894	-6.17348	0.208751	0.294754
spike_control_v2_9		-0.0613878	-1.58379	-6.17991	0.209972	0.2961
hsa-miR-4775	MIMAT0019931	0.0285212	1.56744	-6.19864	0.213575	0.300799
hsa-miR-4433-5p	MIMAT0020956	0.0284701	1.56504	-6.20139	0.214111	0.30117
hsa-miR-193b-3p	MIMAT0002819	0.0233661	1.56259	-6.20419	0.214657	0.301555
hsa-miR-628-3p	MIMAT0003297	-0.0317584	-1.55645	-6.21122	0.216036	0.303108
hsa-miR-3925-5p	MIMAT0018200	0.0350052	1.55519	-6.21265	0.216319	0.303121
ebv-miR-BART10	MIMAT0003420	0.0205654	1.55228	-6.21599	0.216978	0.303633
hsa-miR-3184-5p	MIMAT0015064	0.0411838	1.55115	-6.21727	0.217233	0.303633
hsa-miR-5586-5p	MIMAT0022287	0.0430431	1.54744	-6.22151	0.218075	0.304157
hsa-miR-5196-3p	MIMAT0021129	0.0264625	1.54708	-6.22193	0.218158	0.304157
hsa-miR-569	MIMAT0003234	-0.0205617	-1.54579	-6.22341	0.218453	0.304186
hsa-miR-4704-5p	MIMAT0019803	0.021322	1.54043	-6.22954	0.219679	0.305509
hsv2-miR-H10	MIMAT0014353	0.0355669	1.53469	-6.23609	0.221001	0.306961
hsa-miR-4769-3p	MIMAT0019923	0.0229844	1.52983	-6.24164	0.222127	0.308139
hsa-miR-26b-5p	MIMAT0000083	-0.218104	-1.5219	-6.25069	0.223977	0.310315
hsa-miR-4653-3p	MIMAT0019719	-0.0498648	-1.5066	-6.26814	0.227596	0.314884
hsa-miR-370	MIMAT0000722	0.0427032	1.50556	-6.26931	0.227843	0.314884
hsa-miR-500a-3p	MIMAT0002871	0.0213401	1.4994	-6.27633	0.22932	0.31653
hsa-miR-3126-3p	MIMAT0015377	-0.124256	-1.49526	-6.28105	0.230318	0.317512
hsa-miR-4274	MIMAT0016906	0.033015	1.49004	-6.28699	0.231584	0.31886
hsa-miR-4758-3p	MIMAT0019904	0.0373227	1.48665	-6.29085	0.232411	0.319602
spike_control_v2_18		0.0907556	1.48172	-6.29645	0.233618	0.320862
hsa-miR-409-3p	MIMAT0001639	0.0333281	1.47968	-6.29877	0.23412	0.320988
hsa-miR-4275	MIMAT0016905	-0.0381825	-1.47898	-6.29956	0.23429	0.320988
hsa-miR-1304-3p	MIMAT0022720	-0.0295121	-1.47537	-6.30367	0.235182	0.321813
hsa-miR-484	MIMAT0002174	0.0194356	1.46889	-6.31102	0.236791	0.323614
hsa-miR-10a-5p	MIMAT0000253	0.0356622	1.46348	-6.31715	0.238141	0.325058
hsa-miR-17-3p	MIMAT0000071	-0.0309623	-1.46188	-6.31897	0.238543	0.325206
hsa-miR-3607-3p	MIMAT0017985	-0.020108	-1.45663	-6.32493	0.239865	0.326606
hsa-miR-3692-3p	MIMAT0018122	0.0243711	1.44638	-6.33653	0.24247	0.329747
hsa-miR-4323	MIMAT0016875	0.0405961	1.44145	-6.34211	0.243734	0.331059
hsa-miR-3622a-3p	MIMAT0018004	-0.022453	-1.43825	-6.34574	0.244558	0.331772
hsa-miR-3654	MIMAT0018074	-0.0666685	-1.41316	-6.37406	0.251125	0.340263
hsa-miR-4731-3p	MIMAT0019854	0.0252238	1.40761	-6.38031	0.252602	0.341847
SNORD49A		0.0229382	1.39591	-6.39347	0.255747	0.345352
hsa-miR-5584-5p	MIMAT0022283	-0.0471914	-1.39402	-6.3956	0.25626	0.345352
hsa-miR-4707-5p	MIMAT0019807	0.0394988	1.39372	-6.39593	0.25634	0.345352
hsa-let-7g-5p	MIMAT0000414	-0.131934	-1.39335	-6.39634	0.25644	0.345352
hsa-miR-885-5p	MIMAT0004947	-0.0238708	-1.38944	-6.40074	0.257504	0.346334
hsa-miR-5188	MIMAT0021119	-0.0189665	-1.38818	-6.40216	0.25785	0.346334
hsa-miR-3161	MIMAT0015035	0.0190954	1.38723	-6.40322	0.258108	0.346334
hsa-miR-488-3p	MIMAT0004763	-0.0210029	-1.38414	-6.4067	0.258956	0.347051
hsa-miR-5196-5p	MIMAT0021128	-0.0243531	-1.37914	-6.4123	0.260331	0.348472
hsa-miR-4301	MIMAT0016850	0.0487838	1.37733	-6.41432	0.260829	0.348717
hsa-miR-345-3p	MIMAT0022698	0.0211422	1.36932	-6.4233	0.263054	0.351267
hsv1-miR-H5-3p	MIMAT0008403	0.0944527	1.36639	-6.42658	0.263873	0.351936
SNORD118		0.0462923	1.36433	-6.42888	0.26445	0.352282
hsa-miR-3173-5p	MIMAT0019214	0.0187916	1.36287	-6.43051	0.264858	0.352401
hsa-miR-4462	MIMAT0018986	0.0315657	1.35692	-6.43715	0.266535	0.35397
hsa-miR-3943	MIMAT0018359	0.0200841	1.35642	-6.43771	0.266677	0.35397
hsa-miR-4520a-5p/hsa-miR-4520b-5p		-0.0196651	-1.33473	-6.46189	0.27289	0.361784
hsa-miR-4436a	MIMAT0018952	0.0235126	1.3336	-6.46315	0.27322	0.361787
hsa-miR-23a-5p	MIMAT0004496	-0.100611	-1.33204	-6.46488	0.273671	0.361953
RNU6-1		0.106223	1.33066	-6.46642	0.274075	0.362053
hsa-miR-5572	MIMAT0022260	0.029818	1.3292	-6.46803	0.274499	0.362182
hsa-miR-548n	MIMAT0005916	0.0186798	1.31766	-6.48084	0.277888	0.366217
hsa-miR-1976	MIMAT0009451	0.0325644	1.31585	-6.48285	0.278424	0.36648
hsa-miR-4310	MIMAT0016862	0.04472	1.31391	-6.485	0.278999	0.36648
hsa-miRPlus-C1110		-0.152967	-1.31363	-6.4853	0.279081	0.36648
bkv-miR-B1-5p	MIMAT0009149	-0.0227093	-1.31189	-6.48723	0.279598	0.366724
hsa-miR-4685-3p	MIMAT0019772	-0.0252439	-1.299	-6.50148	0.28346	0.371349
hsa-miR-576-5p	MIMAT0003241	-0.0197606	-1.29786	-6.50274	0.283805	0.371362
hsa-miR-516b-5p	MIMAT0002859	0.0178134	1.2967	-6.50403	0.284156	0.371382
hsa-miR-214-3p	MIMAT0000271	0.159414	1.29143	-6.50983	0.285754	0.37303
hsa-miR-3125	MIMAT0014988	-0.0226686	-1.28476	-6.51718	0.287792	0.374814
hsa-miR-431-5p	MIMAT0001625	0.107099	1.28474	-6.5172	0.287798	0.374814
spike_control_v2_17		0.177509	1.27884	-6.52369	0.289612	0.376499
hsa-miRPlus-A1073		0.0856893	1.27832	-6.52426	0.289772	0.376499
hsa-miR-4533	MIMAT0019072	-0.142332	-1.27709	-6.52561	0.290151	0.37655
hsa-miR-1252	MIMAT0005944	-0.0190868	-1.27022	-6.53315	0.292284	0.378874
hsa-miR-3127-3p	MIMAT0019201	0.0165068	1.25322	-6.55176	0.297631	0.385354
hsa-miR-1913	MIMAT0007888	0.0169329	1.24129	-6.56477	0.301441	0.38983
hsa-miR-1236	MIMAT0005591	0.0318461	1.23886	-6.56742	0.302225	0.390389
hsa-miR-4705	MIMAT0019805	-0.0337841	-1.22437	-6.58316	0.306934	0.396009
hsa-miR-2681-3p	MIMAT0013516	0.0269741	1.22172	-6.58603	0.307804	0.396669
hsa-miR-4522	MIMAT0019060	-0.0855424	-1.21771	-6.59037	0.309123	0.397906
hsa-miR-641	MIMAT0003311	-0.0168021	-1.20886	-6.59993	0.312056	0.401214
hsa-miR-2116-5p	MIMAT0011160	0.0707079	1.19506	-6.61479	0.316688	0.406698
hsa-miR-3140-5p	MIMAT0019204	0.0226437	1.19376	-6.61619	0.317127	0.40679
hsa-miR-339-5p	MIMAT0000764	0.0179885	1.18898	-6.62133	0.318753	0.408402
hsa-miR-320a	MIMAT0000510	0.202142	1.1823	-6.62848	0.321034	0.410849
hsa-miR-4508	MIMAT0019045	0.0272059	1.17564	-6.63561	0.323326	0.413304
hsa-miR-135a-3p	MIMAT0004595	-0.0328669	-1.17237	-6.6391	0.324456	0.414271
hsa-miR-3613-3p	MIMAT0017991	-0.0217544	-1.16761	-6.64417	0.326109	0.415866
hsa-miR-1537	MIMAT0007399	-0.0901289	-1.16662	-6.64523	0.326456	0.415866
hsa-miR-5100	MIMAT0022259	-0.0662606	-1.15888	-6.65346	0.329163	0.418831
hsa-let-7f-5p	MIMAT0000067	-0.117034	-1.15666	-6.65582	0.329946	0.419346
hsa-miR-513c-3p	MIMAT0022728	0.0153764	1.14832	-6.66466	0.332898	0.422613
hsa-miR-4514	MIMAT0019051	0.0375144	1.14622	-6.66689	0.333646	0.423077
hsa-miR-1257	MIMAT0005908	-0.0173899	-1.13752	-6.67608	0.336761	0.426539
hsa-miR-199a-5p	MIMAT0000231	0.020879	1.1349	-6.67884	0.337703	0.426998
hsa-miR-4662a-5p	MIMAT0019731	-0.0202269	-1.13437	-6.6794	0.337895	0.426998
hsa-miR-4699-3p	MIMAT0019795	-0.0594537	-1.12759	-6.68653	0.340349	0.429608
hsa-miR-4424	MIMAT0018939	0.0213046	1.11469	-6.70007	0.345072	0.435074
hsa-miR-4251	MIMAT0016883	-0.01598	-1.10987	-6.7051	0.34685	0.436817
hsa-miR-132-3p	MIMAT0000426	-0.0148043	-1.10549	-6.70967	0.348476	0.438367
hsa-miR-3917	MIMAT0018191	-0.0195307	-1.09873	-6.71671	0.350999	0.44104
hsa-miR-4474-5p	MIMAT0019234	0.0147292	1.09592	-6.71962	0.352053	0.441862
hsa-miR-4484	MIMAT0019018	0.0294888	1.09475	-6.72084	0.352493	0.441914
hsa-miR-1255a	MIMAT0005906	-0.0677507	-1.09098	-6.72475	0.353916	0.443195
hsa-miR-27a-3p	MIMAT0000084	-0.0265072	-1.08485	-6.7311	0.356238	0.4456
hsa-miR-1297	MIMAT0005886	-0.0637527	-1.08011	-6.736	0.358044	0.447353
hsa-miR-374c-3p	MIMAT0022735	0.0155048	1.07345	-6.74286	0.360597	0.450035
hsa-miR-147b	MIMAT0004928	-0.0158045	-1.06877	-6.74767	0.362402	0.451778
hsa-miR-644b-3p	MIMAT0022272	0.0203797	1.06719	-6.7493	0.363014	0.452031
hsa-miR-219-1-3p	MIMAT0004567	0.0215927	1.05511	-6.76167	0.36772	0.457249
hsa-miR-4690-5p	MIMAT0019779	0.0216235	1.05432	-6.76247	0.36803	0.457249
hsa-miR-3688-5p	MIMAT0019223	-0.0505454	-1.05097	-6.76589	0.369346	0.458369
hsa-miR-378e	MIMAT0018927	-0.0176262	-1.04691	-6.77003	0.370947	0.459842
kshv-miR-K12-5	MIMAT0002190	-0.0234181	-1.04515	-6.77181	0.371642	0.460188
hsa-miR-532-5p	MIMAT0002888	0.0229719	1.04031	-6.77673	0.373563	0.462049
hsa-miR-5194	MIMAT0021125	0.0139044	1.03888	-6.77817	0.374132	0.462236
ebv-miR-BART4*	MIMAT0009204	-0.0846588	-1.02464	-6.79257	0.37985	0.468779
hsa-miR-944	MIMAT0004987	0.0145701	1.02193	-6.7953	0.380948	0.46961
hsv1-miR-H1*	MIMAT0015220	0.0145166	1.01852	-6.79872	0.382333	0.470792
SNORD10		0.0136736	1.0104	-6.80685	0.385647	0.474345
hsa-miR-3908	MIMAT0018182	0.0221203	1.00032	-6.81692	0.389805	0.478928
hsa-miR-548ad	MIMAT0018946	0.021881	0.991724	-6.82545	0.393381	0.482786
hsa-miR-3133	MIMAT0014998	-0.0701138	-0.988533	-6.82861	0.394717	0.483403
hsa-miR-2682-3p	MIMAT0013518	-0.0241358	-0.988437	-6.82871	0.394757	0.483403
hsa-miR-4632	MIMAT0019688	0.0544784	0.985842	-6.83127	0.395846	0.484201
hsa-miR-517-5p	MIMAT0002851	0.0149924	0.978291	-6.83871	0.399032	0.487559
hsa-miR-154-5p	MIMAT0000452	-0.0181783	-0.974288	-6.84265	0.400731	0.489095
hsa-miR-4534	MIMAT0019073	-0.153422	-0.968545	-6.84828	0.40318	0.491542
hsa-miR-5189	MIMAT0021120	0.0180531	0.965401	-6.85135	0.404526	0.492641
hsa-miR-1273f	MIMAT0020601	0.0156336	0.946605	-6.86962	0.412663	0.501998
hsa-miR-299-3p	MIMAT0000687	0.0128176	0.936065	-6.87978	0.417292	0.507071
hsa-miR-223-3p	MIMAT0000280	-0.0584706	-0.929327	-6.88625	0.420275	0.510137
hsa-miR-1287	MIMAT0005878	0.0278289	0.928189	-6.88733	0.420781	0.510191
hsa-miR-659-5p	MIMAT0022710	0.0135339	0.921952	-6.89329	0.423563	0.513002
hsa-miR-5682	MIMAT0022470	0.0127282	0.918823	-6.89627	0.424965	0.514138
hsa-let-7c	MIMAT0000064	-0.230581	-0.914474	-6.9004	0.426921	0.51594
hsa-miR-629-3p	MIMAT0003298	-0.03546	-0.901529	-6.91263	0.43279	0.522128
hsa-miR-4728-3p	MIMAT0019850	-0.0127498	-0.901102	-6.91303	0.432985	0.522128
SNORD14B		-0.0130122	-0.899473	-6.91456	0.433729	0.522456
spike_control_v2_25		-0.163763	-0.891705	-6.92184	0.437292	0.52497
hsa-miR-3614-3p	MIMAT0017993	-0.0120011	-0.891535	-6.922	0.43737	0.52497
SNORD68		0.0503215	0.891532	-6.922	0.437372	0.52497
hsa-miR-4788	MIMAT0019958	0.0135171	0.890792	-6.92269	0.437712	0.52497
hsa-miR-4273	MIMAT0016903	0.0140746	0.877908	-6.93468	0.443685	0.531558
hsa-miR-3934	MIMAT0018349	-0.0281871	-0.875725	-6.9367	0.444705	0.532203
spike_control_v2_14		0.0502021	0.874435	-6.93789	0.445308	0.53235
hsa-miR-3119	MIMAT0014981	-0.0122302	-0.867001	-6.94474	0.448798	0.535944
hsa-miR-3145-3p	MIMAT0015016	0.0115458	0.865518	-6.9461	0.449497	0.5362
hsa-miR-1255b-5p	MIMAT0005945	-0.0153452	-0.858539	-6.9525	0.452801	0.539559
hsa-miR-518a-5p/hsa-miR-527		-0.0163434	-0.855896	-6.95491	0.454057	0.540474
hsa-miR-141-3p	MIMAT0000432	0.0117846	0.852534	-6.95798	0.45566	0.5418
hsa-miR-767-5p	MIMAT0003882	0.0173609	0.843898	-6.96581	0.459799	0.546135
hsa-miR-512-3p	MIMAT0002823	0.0126855	0.841285	-6.96817	0.461058	0.547043
hsa-miR-3660	MIMAT0018081	-0.101887	-0.831249	-6.97719	0.465921	0.552221
hsa-miR-130b-3p	MIMAT0000691	-0.0362061	-0.824741	-6.98301	0.469098	0.555025
hsa-miR-766-5p	MIMAT0022714	-0.0138187	-0.824054	-6.98362	0.469435	0.555025
hsa-miR-4524b-5p	MIMAT0022255	0.0127292	0.823327	-6.98427	0.469791	0.555025
hsa-miR-302e	MIMAT0005931	0.0184218	0.805918	-6.99967	0.478392	0.564584
hsa-miR-765	MIMAT0003945	-0.014365	-0.804288	-7.0011	0.479204	0.56494
hsa-miR-4651	MIMAT0019715	0.0154433	0.800486	-7.00443	0.481102	0.566154
hsa-miR-3670	MIMAT0018093	-0.0106976	-0.800177	-7.0047	0.481257	0.566154
hsa-miR-548ao-3p	MIMAT0021030	0.0181022	0.797112	-7.00737	0.482793	0.566214
kshv-miR-K12-9*	MIMAT0002184	0.0106663	0.797054	-7.00742	0.482822	0.566214
hsa-miR-129-2-3p	MIMAT0004605	0.010655	0.797013	-7.00746	0.482842	0.566214
hsa-miR-548au-3p	MIMAT0022292	0.019615	0.785755	-7.01723	0.488519	0.571907
hsa-miR-195-5p	MIMAT0000461	0.0476698	0.785339	-7.01759	0.48873	0.571907
hsa-miR-1285-5p	MIMAT0022719	-0.0520697	-0.782732	-7.01984	0.490053	0.572849
hsa-miR-555	MIMAT0003219	-0.0136165	-0.778198	-7.02374	0.492361	0.574937
hsa-miR-4741	MIMAT0019871	-0.0132364	-0.777186	-7.02461	0.492877	0.574937
hsa-miR-25-5p	MIMAT0004498	-0.0593712	-0.774021	-7.02732	0.494495	0.576217
hsa-miR-187-3p	MIMAT0000262	-0.0283252	-0.771262	-7.02967	0.495909	0.577257
hsa-miR-1306-5p	MIMAT0022726	0.0213021	0.76796	-7.03249	0.497606	0.578624
hsa-miR-193b-5p	MIMAT0004767	0.0117339	0.764744	-7.03522	0.499263	0.579941
kshv-miR-K12-8*	MIMAT0015216	0.013309	0.763637	-7.03616	0.499834	0.579996
hsa-miR-4477b	MIMAT0019005	-0.0100509	-0.76261	-7.03703	0.500365	0.580004
hsa-miR-520a-5p	MIMAT0002833	0.0568243	0.758795	-7.04025	0.50234	0.581685
hsa-miR-342-5p	MIMAT0004694	0.0127103	0.738341	-7.05735	0.513039	0.593452
hsa-miR-221-5p	MIMAT0004568	-0.115108	-0.737112	-7.05837	0.513688	0.593583
hsa-miR-122-3p	MIMAT0004590	0.0784465	0.729611	-7.06455	0.517661	0.597551
hsa-miR-652-5p	MIMAT0022709	0.0114185	0.726685	-7.06695	0.519218	0.598723
hsa-miR-4756-3p	MIMAT0019900	0.0204734	0.723448	-7.0696	0.520944	0.600089
hsa-miR-29a-3p	MIMAT0000086	-0.119652	-0.712224	-7.07871	0.526967	0.606395
hsa-miR-518c-5p	MIMAT0002847	0.0505852	0.708299	-7.08187	0.529085	0.608201
hsa-miR-449a	MIMAT0001541	0.00969047	0.705962	-7.08375	0.53035	0.609023
hsa-miR-4694-3p	MIMAT0019787	-0.0110809	-0.688249	-7.09783	0.540014	0.619478
hsa-miR-1973	MIMAT0009448	0.0207668	0.681534	-7.1031	0.543714	0.623076
hsa-miR-5686	MIMAT0022477	-0.0365142	-0.673961	-7.109	0.547909	0.626761
hsa-miR-4433-3p	MIMAT0018949	-0.0100654	-0.673687	-7.10921	0.548062	0.626761
hsa-miR-4687-3p	MIMAT0019775	0.0601605	0.669384	-7.11254	0.550457	0.628851
SNORD3@		0.0243643	0.66388	-7.11678	0.553533	0.631712
kshv-miR-K12-10a*	MIMAT0015212	-0.0119616	-0.661816	-7.11836	0.55469	0.63195
hsa-miR-5187-3p	MIMAT0021118	-0.0171571	-0.661471	-7.11862	0.554883	0.63195
hiv1-miR-H1	MIMAT0004480	0.0342486	0.653828	-7.12444	0.559184	0.636194
SNORD13		-0.0189076	-0.650523	-7.12694	0.561051	0.637418
hsa-miR-4305	MIMAT0016857	-0.0139964	-0.649886	-7.12742	0.561412	0.637418
hsa-miR-587	MIMAT0003253	-0.0311594	-0.641866	-7.13345	0.565965	0.641929
hsa-miR-889	MIMAT0004921	-0.00969753	-0.639031	-7.13557	0.567581	0.643104
hsa-miR-4725-5p	MIMAT0019843	0.00993631	0.632923	-7.1401	0.571075	0.645946
hsa-miR-4712-3p	MIMAT0019819	0.00946458	0.632606	-7.14034	0.571257	0.645946
hsa-miR-3652	MIMAT0018072	0.0180146	0.631039	-7.14149	0.572156	0.646302
hsa-miR-4421	MIMAT0018934	-0.0634538	-0.626384	-7.14492	0.574833	0.64827
hsa-miR-5584-3p	MIMAT0022284	0.0378123	0.625974	-7.14522	0.575069	0.64827
hcmv-miR-US5-2	MIMAT0001580	0.00896542	0.624012	-7.14666	0.5762	0.648884
hsa-miR-4307	MIMAT0016860	-0.0113541	-0.617206	-7.15162	0.580137	0.652655
hsa-miR-622	MIMAT0003291	0.00844362	0.615686	-7.15272	0.581019	0.652983
hsa-miR-371a-3p	MIMAT0000723	-0.0394952	-0.610972	-7.15612	0.583761	0.655399
hsa-miR-3157-3p	MIMAT0019210	-0.0133889	-0.59866	-7.16491	0.590965	0.662815
hsa-miR-513b	MIMAT0005788	0.00991355	0.59043	-7.17071	0.595817	0.66758
hsa-miR-605	MIMAT0003273	0.0139862	0.584032	-7.17518	0.599607	0.671148
hsa-miR-4652-3p	MIMAT0019717	0.0100861	0.580745	-7.17746	0.601562	0.672656
hsa-miR-135b-5p	MIMAT0000758	0.00966145	0.578267	-7.17917	0.603038	0.673625
hsa-miR-519e-5p	MIMAT0002828	0.0381222	0.574216	-7.18195	0.605457	0.675217
hsa-miR-4717-5p	MIMAT0019829	-0.00775324	-0.573838	-7.18221	0.605683	0.675217
hsa-miR-15a-3p	MIMAT0004488	-0.00875552	-0.56799	-7.1862	0.609187	0.67844
hsa-miR-548v	MIMAT0015020	-0.0599188	-0.566936	-7.18691	0.60982	0.678463
hsa-miR-654-3p	MIMAT0004814	-0.00865651	-0.562547	-7.18988	0.612461	0.680484
hsa-miR-340-3p	MIMAT0000750	-0.0337238	-0.561875	-7.19033	0.612866	0.680484
hsa-miR-30c-5p	MIMAT0000244	-0.135488	-0.548525	-7.19924	0.620951	0.688771
hsa-miR-4480	MIMAT0019014	0.00715609	0.544116	-7.20214	0.623637	0.691058
hsa-miR-150-5p	MIMAT0000451	0.0147382	0.542822	-7.20299	0.624427	0.691241
hsa-miR-4676-5p	MIMAT0019758	-0.00727339	-0.538125	-7.20605	0.6273	0.693379
hsa-miR-4252	MIMAT0016886	0.0177174	0.537617	-7.20638	0.627611	0.693379
hsa-miR-30c-2-3p	MIMAT0004550	0.0262302	0.53657	-7.20706	0.628253	0.693396
hsa-miR-5187-5p	MIMAT0021117	0.0076351	0.532741	-7.20953	0.630604	0.695297
hsa-miR-485-3p	MIMAT0002176	0.00733349	0.522528	-7.21606	0.636902	0.701526
hsa-miR-125a-3p	MIMAT0004602	0.0101343	0.520981	-7.21705	0.63786	0.701526
hsa-miR-4645-5p	MIMAT0019705	0.0221977	0.520505	-7.21735	0.638154	0.701526
hsa-miR-502-3p	MIMAT0004775	0.00682969	0.5028	-7.22838	0.649184	0.712943
hsa-miR-10b-3p	MIMAT0004556	-0.00666312	-0.496352	-7.23232	0.653231	0.716677
hsa-miR-3921	MIMAT0018196	-0.0376466	-0.495266	-7.23298	0.653915	0.716717
hsa-miR-766-3p	MIMAT0003888	0.00881431	0.491078	-7.23551	0.656554	0.718897
hsa-miR-374b-3p	MIMAT0004956	-0.00808894	-0.484717	-7.23931	0.660575	0.722585
hsa-miR-4725-3p	MIMAT0019844	0.00858442	0.472977	-7.24623	0.668036	0.730025
hsa-miR-200b-3p	MIMAT0000318	-0.043348	-0.462837	-7.25208	0.674522	0.736386
hsa-miRPlus-A1086		-0.00677918	-0.460699	-7.25331	0.675894	0.737128
hsa-miR-4445-5p	MIMAT0018963	0.0283103	0.45904	-7.25425	0.67696	0.737128
hsa-miR-659-3p	MIMAT0003337	0.0234122	0.458668	-7.25446	0.677199	0.737128
hsa-miR-4753-3p	MIMAT0019891	0.00891551	0.448979	-7.25991	0.683447	0.743198
hsa-miR-556-3p	MIMAT0004793	0.00792401	0.439314	-7.26524	0.689713	0.749276
kshv-miR-K12-12*	MIMAT0003712	-0.00586959	-0.423885	-7.27354	0.699784	0.759472
hsa-miR-1184	MIMAT0005829	-0.00592749	-0.422742	-7.27415	0.700534	0.759541
hsa-miR-3160-5p	MIMAT0019212	-0.00799441	-0.420777	-7.27518	0.701823	0.760194
hsa-miR-660-5p	MIMAT0003338	-0.00793976	-0.416653	-7.27734	0.704534	0.762063
hsa-miR-761	MIMAT0010364	-0.00567153	-0.416057	-7.27765	0.704926	0.762063
hsa-miR-3591-5p	MIMAT0019876	-0.0181779	-0.409348	-7.28112	0.709349	0.766097
hsa-miR-4431	MIMAT0018947	0.00610613	0.398013	-7.28687	0.716857	0.773451
hsa-miR-4532	MIMAT0019071	0.0253686	0.392063	-7.28982	0.720816	0.776965
hsa-miR-4795-3p	MIMAT0019969	0.0300899	0.384099	-7.29372	0.726133	0.781935
hsa-miR-27a-5p	MIMAT0004501	-0.00515889	-0.374635	-7.29826	0.732478	0.788001
hsa-miRPlus-C1087		0.00506702	0.369334	-7.30075	0.736044	0.791068
hsa-miR-181a-2-3p	MIMAT0004558	0.00534604	0.364452	-7.30302	0.739336	0.793836
hsa-miR-323a-3p	MIMAT0000755	0.00978416	0.354783	-7.30743	0.745879	0.800085
hsa-miR-504	MIMAT0002875	-0.00504431	-0.351555	-7.30888	0.748069	0.800953
hsa-miR-7-1-3p	MIMAT0004553	-0.0101545	-0.351459	-7.30892	0.748135	0.800953
hsa-miR-1185-2-3p	MIMAT0022713	-0.022854	-0.33845	-7.31464	0.756996	0.809656
hsa-miR-500a-5p	MIMAT0004773	-0.00447864	-0.336026	-7.31568	0.758652	0.810645
hsa-miR-3146	MIMAT0015018	-0.00547944	-0.323081	-7.32113	0.767529	0.819127
hsa-miR-642b-5p	MIMAT0022736	0.0213313	0.3219	-7.32162	0.768341	0.819127
hsa-miR-1272	MIMAT0005925	-0.00505323	-0.321218	-7.3219	0.76881	0.819127
hsa-miR-2681-5p	MIMAT0013515	-0.00988453	-0.316313	-7.3239	0.772188	0.821935
hsa-miR-542-3p	MIMAT0003389	-0.00439515	-0.314997	-7.32443	0.773096	0.822111
hsa-miR-574-3p	MIMAT0003239	-0.041501	-0.313594	-7.325	0.774064	0.82235
hsa-miR-1285-3p	MIMAT0005876	-0.00432176	-0.306513	-7.32781	0.778959	0.826757
hsa-let-7e-5p	MIMAT0000066	-0.113193	-0.30375	-7.32889	0.780872	0.827994
hsa-miR-4648	MIMAT0019710	0.0193678	0.301523	-7.32976	0.782416	0.828837
hsa-miR-184	MIMAT0000454	-0.0305869	-0.288767	-7.3346	0.791284	0.83743
spike_control_v2_19		0.0116758	0.285562	-7.33579	0.79352	0.838993
hsa-miR-595	MIMAT0003263	0.00375902	0.27805	-7.33852	0.798768	0.843737
hsa-miR-4784	MIMAT0019948	-0.0301655	-0.265067	-7.34307	0.807873	0.85254
hsa-miR-874	MIMAT0004911	-0.00421119	-0.230734	-7.35411	0.832141	0.877315
hsa-miR-1260a	MIMAT0005911	-0.00455823	-0.226884	-7.35525	0.834879	0.879158
hsa-miR-2355-3p	MIMAT0017950	0.00818831	0.225311	-7.35572	0.835998	0.879158
hsa-miR-382-5p	MIMAT0000737	0.00309995	0.224927	-7.35583	0.836272	0.879158
hsa-miR-877-3p	MIMAT0004950	0.00323822	0.223796	-7.35616	0.837077	0.879169
hsa-miR-4536-3p	MIMAT0020959	0.00574287	0.217099	-7.35808	0.841851	0.883345
hsa-miR-1248	MIMAT0005900	-0.00285293	-0.210904	-7.35981	0.846275	0.887146
hsa-let-7f-1-3p	MIMAT0004486	-0.00309073	-0.208855	-7.36037	0.84774	0.887723
hsa-miR-423-5p	MIMAT0004748	-0.0141926	-0.207892	-7.36063	0.848429	0.887723
hsa-miR-212-3p	MIMAT0000269	0.00403835	0.200639	-7.36256	0.853622	0.892314
hsa-miR-3074-5p	MIMAT0019208	0.00298215	0.197836	-7.36329	0.855632	0.89357
hsa-miR-129-5p	MIMAT0000242	-0.00679805	-0.194961	-7.36403	0.857695	0.894881
hsa-miR-4268	MIMAT0016896	-0.0025937	-0.183544	-7.36686	0.865902	0.902027
hsa-miR-34c-3p	MIMAT0004677	-0.00311012	-0.183166	-7.36695	0.866174	0.902027
hsv2-miR-H6*	MIMAT0015652	0.00607685	0.17804	-7.36816	0.869867	0.905021
RNU5		-0.00262176	-0.169492	-7.3701	0.876034	0.910582
hsa-miR-647	MIMAT0003317	-0.00276413	-0.166134	-7.37084	0.87846	0.911785
hsa-miRPlus-J1011		0.00716487	0.164491	-7.3712	0.879647	0.911785
hsa-miR-548as-3p	MIMAT0022268	-0.0105739	-0.164471	-7.3712	0.879662	0.911785
hsa-miR-3676-5p	MIMAT0022734	-0.00223005	-0.161257	-7.37189	0.881987	0.912185
hsa-miR-7-2-3p	MIMAT0004554	-0.00827714	-0.160393	-7.37207	0.882612	0.912185
hsa-miR-3120-5p	MIMAT0019198	-0.00232626	-0.159408	-7.37228	0.883325	0.912185
hsa-miR-2392	MIMAT0019043	0.00785459	0.159381	-7.37229	0.883344	0.912185
hsa-miR-2355-5p	MIMAT0016895	0.00231162	0.156233	-7.37294	0.885623	0.913686
hsa-miR-600	MIMAT0003268	-0.00221501	-0.154908	-7.37321	0.886583	0.913824
hsa-miR-3165	MIMAT0015039	0.00203549	0.146664	-7.37484	0.89256	0.919129
hsa-miR-4468	MIMAT0018995	-0.0080966	-0.145496	-7.37506	0.893408	0.919147
ebv-miR-BART1-5p	MIMAT0000999	-0.00194538	-0.139426	-7.3762	0.897816	0.922654
hsa-miR-3673	MIMAT0018096	0.00889415	0.138508	-7.37637	0.898483	0.922654
hsa-miR-3149	MIMAT0015022	0.0154695	0.134819	-7.37703	0.901165	0.92455
kshv-miR-K12-12	MIMAT0015238	-0.0134113	-0.133097	-7.37733	0.902418	0.924978
hsa-miR-197-3p	MIMAT0000227	-0.00242569	-0.124744	-7.37875	0.908498	0.930211
hsa-miR-654-5p	MIMAT0003330	-0.00215237	-0.123776	-7.37891	0.909204	0.930211
hsa-miR-192-5p	MIMAT0000222	0.00305261	0.11986	-7.37954	0.912058	0.93179
hsa-miR-4290	MIMAT0016921	-0.0109424	-0.119349	-7.37962	0.91243	0.93179
hsa-miR-548j	MIMAT0005875	-0.00651574	-0.112	-7.38074	0.917792	0.936401
hsa-miR-4659a-3p	MIMAT0019727	-0.00180044	-0.107064	-7.38145	0.921396	0.938526
hsa-miR-105-5p	MIMAT0000102	0.00149214	0.106186	-7.38157	0.922038	0.938526
hsa-miR-615-3p	MIMAT0003283	-0.00139339	-0.105665	-7.38165	0.922418	0.938526
hsa-miR-183-3p	MIMAT0004560	0.00785372	0.102801	-7.38204	0.924511	0.939792
hsa-miR-620	MIMAT0003289	-0.0166624	-0.0991483	-7.38253	0.927181	0.941642
hsa-miR-1253	MIMAT0005904	-0.00236706	-0.0935172	-7.38324	0.931301	0.944574
hsa-miR-378h	MIMAT0018984	0.00124997	0.0927766	-7.38333	0.931843	0.944574
hsa-miR-377-5p	MIMAT0004689	-0.00164148	-0.0917035	-7.38346	0.932628	0.944574
hsa-let-7b-5p	MIMAT0000063	-0.00327427	-0.0487865	-7.38745	0.96411	0.973581
hsa-miR-5590-3p	MIMAT0022300	0.00412528	0.0486691	-7.38745	0.964196	0.973581
ebv-miR-BART3	MIMAT0003411	0.00214557	0.0480387	-7.38749	0.96466	0.973581
hsa-miR-4758-5p	MIMAT0019903	-0.00114438	-0.0478667	-7.3875	0.964786	0.973581
hsa-miR-4798-3p	MIMAT0019975	0.00277495	0.0413749	-7.38789	0.969558	0.977505
hsa-miR-5702	MIMAT0022495	-0.000463362	-0.02899	-7.38846	0.978666	0.98579
hsa-miR-3667-3p	MIMAT0018090	0.000690832	0.0246552	-7.38862	0.981855	0.988103
hsa-miR-5002-3p	MIMAT0021024	0.000295782	0.01951	-7.38877	0.985641	0.991012
hsa-miR-4472	MIMAT0018999	0.00289955	0.0181852	-7.3888	0.986616	0.991092
hsa-miR-3591-3p	MIMAT0019877	0.000277643	0.0137428	-7.38889	0.989885	0.993475
spike_control_v2_1		-8.88e-16	-6.76e-14	-7.38902	1	1
hsa-miR-3191-5p	MIMAT0022732	0	0	-7.38902	1	1
spike_control_v2_23		-8.88e-16	-6.76e-14	-7.38902	1	1
spike_control_v2_51		-8.88e-16	-6.76e-14	-7.38902	1	1

## Sheet: DEmiRNAs target genes
miRNA	target_gene_Refseq	Target Score (Confidence)	hgnc_symbol
hsa-miR-151a-5p	NM_001253902	62.6249	MEST
hsa-miR-151a-5p	NM_020384	50.6486	CLDN2
hsa-miR-151a-5p	NM_001184773	91.5173	SEZ6L
hsa-miR-151a-5p	NM_001318726	54.1574	ZNF532
hsa-miR-151a-5p	NM_001151	63.7901	SLC25A4
hsa-miR-151a-5p	NM_018181	54.1574	ZNF532
hsa-miR-151a-5p	NM_001322188	54.2965	CNTNAP4
hsa-miR-151a-5p	NM_021936	66.9304	PAPPA2
hsa-miR-151a-5p	NM_033240	53.1923	PML
hsa-miR-151a-5p	NM_138323	53.1126	PCSK6
hsa-miR-151a-5p	NM_001258261	90.4391	UTY
hsa-miR-151a-5p	NM_015039	65.367	NMNAT2
hsa-miR-151a-5p	NM_001319139	89.5558	AK2
hsa-miR-151a-5p	NM_001145546	70.6281	GALP
hsa-miR-151a-5p	NM_001320287	78.5718	SLC44A5
hsa-miR-151a-5p	NM_001303514	60.4498	PDZD4
hsa-miR-151a-5p	NM_001128916	50	TOMM40
hsa-miR-151a-5p	NM_032052	65.3359	PATZ1
hsa-miR-151a-5p	NM_001258268	90.3475	UTY
hsa-miR-151a-5p	NM_213651	86.3464	SLC25A24
hsa-miR-151a-5p	NM_006063	63.9909	KLHL41
hsa-miR-151a-5p	NM_001282902	71.2095	TRPS1
hsa-miR-151a-5p	NM_001199534	53.1891	RAB5IF
hsa-miR-151a-5p	NM_007204	73.1884	DDX20
hsa-miR-151a-5p	NM_001303512	60.4498	PDZD4
hsa-miR-151a-5p	NM_000135	92.8769	FANCA
hsa-miR-151a-5p	NM_001258254	90.4391	UTY
hsa-miR-151a-5p	NM_001319141	89.5205	AK2
hsa-miR-151a-5p	NM_001184775	82.0057	SEZ6L
hsa-miR-151a-5p	NM_018221	50.9617	MOB1A
hsa-miR-151a-5p	NM_033401	54.2965	CNTNAP4
hsa-miR-151a-5p	NM_002402	62.6249	MEST
hsa-miR-151a-5p	NM_001018066	74.6002	NTRK2
hsa-miR-151a-5p	NM_001184776	82.0057	SEZ6L
hsa-miR-151a-5p	NM_207372	63.8342	SH2D4B
hsa-miR-151a-5p	NM_001258266	90.4391	UTY
hsa-miR-151a-5p	NM_015088	51.9815	TNRC6B
hsa-miR-151a-5p	NM_001040458	74.2491	ERAP1
hsa-miR-151a-5p	NM_001171095	50.6486	CLDN2
hsa-miR-151a-5p	NM_033106	71.6009	GALP
hsa-miR-151a-5p	NM_021115	82.0057	SEZ6L
hsa-miR-151a-5p	NM_001201329	80.3311	PPP1R3B
hsa-miR-151a-5p	NM_018969	53.4059	GPR173
hsa-miR-151a-5p	NM_001318327	68.7627	DNMBP
hsa-miR-151a-5p	NM_001018070	73.8644	CORO1B
hsa-miR-151a-5p	NM_022454	57.7383	SOX17
hsa-miR-151a-5p	NM_001282673	69.6119	FAAP20
hsa-miR-151a-5p	NM_001258269	95.791	UTY
hsa-miR-151a-5p	NM_001243772	84.678	APH1A
hsa-miR-151a-5p	NM_001291454	50	ATP2C2
hsa-miR-151a-5p	NM_023068	77.9926	SIGLEC1
hsa-miR-151a-5p	NM_001199535	53.2246	TGIF2-RAB5IF
hsa-miR-151a-5p	NM_001258253	90.4391	UTY
hsa-miR-151a-5p	NM_001318728	54.1574	ZNF532
hsa-miR-151a-5p	NM_001317111	50.9617	MOB1A
hsa-miR-151a-5p	NM_001134779	53.1855	IPO11
hsa-miR-151a-5p	NM_001523	67.1978	HAS1
hsa-miR-151a-5p	NM_138994	54.2965	CNTNAP4
hsa-miR-151a-5p	NM_015527	55.9064	TBC1D10B
hsa-miR-151a-5p	NM_016335	67.8246	PRODH
hsa-miR-151a-5p	NM_033244	62.1015	PML
hsa-miR-151a-5p	NM_001271610	73.572	STX10
hsa-miR-151a-5p	NM_001130058	78.5669	SLC44A5
hsa-miR-151a-5p	NM_001258258	90.4391	UTY
hsa-miR-151a-5p	NM_001322190	54.2965	CNTNAP4
hsa-miR-151a-5p	NM_001322181	54.2965	CNTNAP4
hsa-miR-151a-5p	NM_001322178	54.2965	CNTNAP4
hsa-miR-151a-5p	NM_001258262	90.4391	UTY
hsa-miR-151a-5p	NM_014990	87.4608	RALGAPA1
hsa-miR-151a-5p	NM_001077628	84.678	APH1A
hsa-miR-151a-5p	NM_003870	80.8329	IQGAP1
hsa-miR-151a-5p	NM_001303516	60.4498	PDZD4
hsa-miR-151a-5p	NM_001253901	62.6249	MEST
hsa-miR-151a-5p	NM_001242828	65.7746	ELOVL5
hsa-miR-151a-5p	NM_001258251	90.4391	UTY
hsa-miR-151a-5p	NM_001253900	62.6249	MEST
hsa-miR-151a-5p	NM_153029	74.8033	N4BP1
hsa-miR-151a-5p	NM_013411	89.5558	AK2
hsa-miR-151a-5p	NM_001258264	90.4391	UTY
hsa-miR-151a-5p	NM_018008	79.5869	FEZF2
hsa-miR-151a-5p	NM_001199786	56.4023	FKBP1A
hsa-miR-151a-5p	NM_177524	62.6249	MEST
hsa-miR-151a-5p	NM_001258256	90.4391	UTY
hsa-miR-151a-5p	NM_001207033	51.1198	RNF40
hsa-miR-151a-5p	NM_020441	73.8644	CORO1B
hsa-miR-151a-5p	NM_003486	53.3693	SLC7A5
hsa-miR-151a-5p	NM_014771	51.1198	RNF40
hsa-miR-151a-5p	NM_177525	62.6249	MEST
hsa-miR-151a-5p	NM_001258260	90.4391	UTY
hsa-miR-151a-5p	NM_015431	63.0338	TRIM58
hsa-miR-151a-5p	NM_001171092	50.6486	CLDN2
hsa-miR-151a-5p	NM_001258257	90.4391	UTY
hsa-miR-151a-5p	NM_001322189	54.2965	CNTNAP4
hsa-miR-151a-5p	NM_001258267	90.3475	UTY
hsa-miR-151a-5p	NM_016022	83.3381	APH1A
hsa-miR-151a-5p	NM_001024843	51.9815	TNRC6B
hsa-miR-151a-5p	NM_138324	53.3405	PCSK6
hsa-miR-151a-5p	NM_001256071	58.9485	RNF213
hsa-miR-151a-5p	NM_001128917	50	TOMM40
hsa-miR-151a-5p	NM_001031711	52.244	ERGIC1
hsa-miR-151a-5p	NM_016338	53.1855	IPO11
hsa-miR-151a-5p	NM_001018057	56.8559	DKK3
hsa-miR-151a-5p	NM_032818	61.5952	ARHGEF39
hsa-miR-151a-5p	NM_017682	77.5126	BEST2
hsa-miR-151a-5p	NM_001319142	89.5558	AK2
hsa-miR-151a-5p	NM_003848	68.2133	SUCLG2
hsa-miR-151a-5p	NM_001184774	82.0057	SEZ6L
hsa-miR-151a-5p	NM_178238	72.134	PILRB
hsa-miR-151a-5p	NM_001286167	92.4649	FANCA
hsa-miR-151a-5p	NM_001258255	90.4391	UTY
hsa-miR-151a-5p	NM_001283043	87.4608	RALGAPA1
hsa-miR-151a-5p	NM_001018065	74.6002	NTRK2
hsa-miR-151a-5p	NM_001303515	60.4498	PDZD4
hsa-miR-151a-5p	NM_001493	50	GDI1
hsa-miR-151a-5p	NM_001317112	50.7648	MOB1A
hsa-miR-151a-5p	NM_024607	80.3311	PPP1R3B
hsa-miR-151a-5p	NM_001258249	90.4391	UTY
hsa-miR-151a-5p	NM_013253	56.8559	DKK3
hsa-miR-151a-5p	NM_014861	50	ATP2C2
hsa-miR-151a-5p	NM_001303513	60.4498	PDZD4
hsa-miR-151a-5p	NM_170706	65.367	NMNAT2
hsa-miR-151a-5p	NM_013386	86.3464	SLC25A24
hsa-miR-151a-5p	NM_001318727	54.1574	ZNF532
hsa-miR-151a-5p	NM_032512	60.4498	PDZD4
hsa-miR-151a-5p	NM_213600	55.0947	PLA2G4F
hsa-miR-151a-5p	NM_001258252	90.4391	UTY
hsa-miR-151a-5p	NM_015221	68.7627	DNMBP
hsa-miR-151a-5p	NM_001198541	74.2491	ERAP1
hsa-miR-151a-5p	NM_005430	53.3757	WNT1
hsa-miR-151a-5p	NM_001184777	82.0057	SEZ6L
hsa-miR-151a-5p	NM_017668	67.9729	NDE1
hsa-miR-151a-5p	NM_001199199	89.5558	AK2
hsa-miR-151a-5p	NM_015881	56.8559	DKK3
hsa-miR-151a-5p	NM_001207034	51.1198	RNF40
hsa-miR-151a-5p	NM_001317110	50.9617	MOB1A
hsa-miR-151a-5p	NM_001318326	68.7627	DNMBP
hsa-miR-151a-5p	NM_001322191	54.2965	CNTNAP4
hsa-miR-151a-5p	NM_001243771	83.3381	APH1A
hsa-miR-151a-5p	NM_007125	90.4391	UTY
hsa-miR-151a-5p	NM_001270601	65.5634	ASCL5
hsa-miR-151a-5p	NM_001145719	63.8342	SH2D4B
hsa-miR-151a-5p	NM_000801	55.0489	FKBP1A
hsa-miR-151a-5p	NM_012419	81.4843	RGS17
hsa-miR-151a-5p	NM_199245	62.7757	VAMP1
hsa-miR-151a-5p	NM_001297436	67.1978	HAS1
hsa-miR-151a-5p	NM_002241	54.5287	KCNJ10
hsa-miR-151a-5p	NM_001258270	90.3475	UTY
hsa-miR-151a-5p	NM_004093	53.1547	EFNB2
hsa-miR-151a-5p	NM_001258265	90.4391	UTY
hsa-miR-151a-5p	NM_001322179	54.2965	CNTNAP4
hsa-miR-151a-5p	NM_001258250	90.4391	UTY
hsa-miR-151a-5p	NM_001286527	50	ATP2C2
hsa-miR-151a-5p	NM_001322180	54.2965	CNTNAP4
hsa-miR-151a-5p	NM_001322187	54.2965	CNTNAP4
hsa-miR-151a-5p	NM_001258263	90.4391	UTY
hsa-miR-151a-5p	NM_001258259	90.4391	UTY
hsa-miR-151a-5p	NM_001143979	82.2249	NDE1
hsa-miR-151a-5p	NM_001320285	78.5718	SLC44A5
hsa-miR-151a-5p	NM_001195226	67.8246	PRODH
hsa-miR-151a-5p	NM_006114	50	TOMM40
hsa-miR-151a-5p	NM_001162501	51.9815	TNRC6B
hsa-miR-151a-5p	NM_001286572	51.1198	RNF40
hsa-miR-198	NM_001204878	52.1588	BAG4
hsa-miR-198	NM_173359	76.9795	EIF4E3
hsa-miR-198	NM_001321265	63.1219	MBOAT2
hsa-miR-198	NM_004979	55.6902	KCND1
hsa-miR-198	NM_018400	55.8296	SCN3B
hsa-miR-198	NM_019000	86.9574	RETREG1
hsa-miR-198	NM_017420	59.0569	SIX4
hsa-miR-198	NM_001304996	77.7888	TMEM170A
hsa-miR-198	NM_001270735	60.5078	BCL2L13
hsa-miR-198	NM_001303543	92.3533	VBP1
hsa-miR-198	NM_012405	52.2274	ICMT
hsa-miR-198	NM_001206856	57.7516	CAPRIN2
hsa-miR-198	NM_181442	50.8577	ADNP
hsa-miR-198	NM_007126	56.7233	VCP
hsa-miR-198	NM_015215	67.9814	CAMTA1
hsa-miR-198	NM_001130487	51.4687	NDRG4
hsa-miR-198	NM_152621	62.1475	SGMS2
hsa-miR-198	NM_001102470	50.4512	ADH6
hsa-miR-198	NM_001322390	96.3353	ENTPD6
hsa-miR-198	NM_001287249	54.2947	D2HGDH
hsa-miR-198	NM_001319079	84.3408	HMGA1
hsa-miR-198	NM_031445	50.5136	AMMECR1L
hsa-miR-198	NM_001290271	67.068	LILRA2
hsa-miR-198	NM_001003665	54.6351	STUM
hsa-miR-198	NM_000624	50	SERPINA5
hsa-miR-198	NM_004485	63.1927	GNG4
hsa-miR-198	NM_001242835	51.4687	NDRG4
hsa-miR-198	NM_201437	63.8135	TCEA1
hsa-miR-198	NM_001322378	96.3353	ENTPD6
hsa-miR-198	NM_080627	84.4853	SOGA1
hsa-miR-198	NM_001323282	71.7918	RBL1
hsa-miR-198	NM_001317941	96.3353	ENTPD6
hsa-miR-198	NM_001136543	53.8779	LYSMD1
hsa-miR-198	NM_001034850	94.2402	RETREG1
hsa-miR-198	NM_005460	52.0226	SNCAIP
hsa-miR-198	NM_001304997	77.7888	TMEM170A
hsa-miR-198	NM_001317099	76.7151	DNAJB4
hsa-miR-198	NM_001278685	58.675	AMOTL2
hsa-miR-198	NM_014548	82.4616	TMOD2
hsa-miR-198	NM_022720	79.0358	DGCR8
hsa-miR-198	NM_001160230	84.7475	ADARB1
hsa-miR-198	NM_001290214	89.219	CTBP2
hsa-miR-198	NM_022071	52.1159	SH2D4A
hsa-miR-198	NM_001297653	52.9018	DDR1
hsa-miR-198	NM_006197	73.1163	PCM1
hsa-miR-198	NM_001289905	55.1898	IL17RA
hsa-miR-198	NM_021219	52.671	JAM2
hsa-miR-198	NM_000947	51.0908	PRIM2
hsa-miR-198	NM_006025	61.9543	ENDOU
hsa-miR-198	NM_005999	71.3438	TSNAX
hsa-miR-198	NM_001321935	65.6895	FGF14
hsa-miR-198	NM_024310	70.6725	PLEKHF1
hsa-miR-198	NM_206855	63.5556	QKI
hsa-miR-198	NM_030799	56.9406	YIPF5
hsa-miR-198	NM_001282886	76.9795	EIF4E3
hsa-miR-198	NM_016201	58.675	AMOTL2
hsa-miR-198	NM_024646	55.2174	ZYG11B
hsa-miR-198	NM_001097611	63.5463	KNCN
hsa-miR-198	NM_001270407	52.671	JAM2
hsa-miR-198	NM_001321934	65.6895	FGF14
hsa-miR-198	NM_001319078	84.3408	HMGA1
hsa-miR-198	NM_017772	60.7829	TBC1D22B
hsa-miR-198	NM_001136230	84.5266	HSD17B13
hsa-miR-198	NM_001318086	76.5547	SEC24B
hsa-miR-198	NM_001307929	67.7614	EIF3M
hsa-miR-198	NM_173854	50.8584	SLC41A1
hsa-miR-198	NM_001135179	65.6521	ZDHHC3
hsa-miR-198	NM_001040179	64.0479	MCHR2
hsa-miR-198	NM_001322838	50.6701	KCNMA1
hsa-miR-198	NM_006182	65.7718	DDR2
hsa-miR-198	NM_198188	51.1351	ASTN2
hsa-miR-198	NM_020150	56.7472	SAR1A
hsa-miR-198	NM_004337	71.7242	OSGIN2
hsa-miR-198	NM_001146256	61.2873	ZDHHC15
hsa-miR-198	NM_012248	82.1364	SEPHS2
hsa-miR-198	NM_001318014	67.721	OR2H1
hsa-miR-198	NM_001290135	91.3209	EI24
hsa-miR-198	NM_020459	63.3685	PAIP2B
hsa-miR-198	NM_006487	53.904	FBLN1
hsa-miR-198	NM_001300884	79.2918	CHIC1
hsa-miR-198	NM_198882	51.6282	SYNRG
hsa-miR-198	NM_001164715	64.8324	ZNF605
hsa-miR-198	NM_001321944	65.6895	FGF14
hsa-miR-198	NM_145901	84.3408	HMGA1
hsa-miR-198	NM_001286238	84.1537	SPATA6
hsa-miR-198	NM_173214	52.18	NFAT5
hsa-miR-198	NM_001127384	61.8502	CTNNA3
hsa-miR-198	NM_014265	86.6968	ADAM28
hsa-miR-198	NM_001256676	61.6664	STOML1
hsa-miR-198	NM_001258025	84.4668	TRIM60
hsa-miR-198	NM_006236	84.5116	POU3F3
hsa-miR-198	NM_001321468	59.8861	THUMPD2
hsa-miR-198	NM_152344	60.526	LSM12
hsa-miR-198	NM_001134649	76.9795	EIF4E3
hsa-miR-198	NM_001322397	93.6364	ENTPD6
hsa-miR-198	NM_007106	56.9359	UBL3
hsa-miR-198	NM_032296	71.4905	FLYWCH1
hsa-miR-198	NM_178156	82.3025	FUT8
hsa-miR-198	NM_001321072	83.3874	CBS
hsa-miR-198	NM_052855	57.6834	ANKRD40
hsa-miR-198	NM_001173480	53.2272	ARHGEF9
hsa-miR-198	NM_004663	89.6676	RAB11A
hsa-miR-198	NM_001301202	56.2736	RASAL1
hsa-miR-198	NM_001759	52.8959	CCND2
hsa-miR-198	NM_024423	68.7844	DSC3
hsa-miR-198	NM_001286402	52.9681	CIITA
hsa-miR-198	NM_001322382	96.3353	ENTPD6
hsa-miR-198	NM_001322389	96.3353	ENTPD6
hsa-miR-198	NM_032826	56.7214	SLC35B4
hsa-miR-198	NM_001190266	79.6755	ATG16L1
hsa-miR-198	NM_001278354	60.2551	FRS2
hsa-miR-198	NM_080838	53.2256	CCN4
hsa-miR-198	NM_024645	57.6442	ZMAT4
hsa-miR-198	NM_001318944	60.1033	VPS26A
hsa-miR-198	NM_001164179	57.9122	ENTPD1
hsa-miR-198	NM_152924	54.8302	ABHD2
hsa-miR-198	NM_001270383	53.1648	ENKUR
hsa-miR-198	NM_004896	60.1033	VPS26A
hsa-miR-198	NM_001278353	60.2551	FRS2
hsa-miR-198	NM_001160259	88.08	CNR1
hsa-miR-198	NM_001242834	51.4687	NDRG4
hsa-miR-198	NM_002833	53.284	PTPN9
hsa-miR-198	NM_001135772	80.1334	NA
hsa-miR-198	NM_001004356	88.7835	FGFRL1
hsa-miR-198	NM_001206572	51.6489	SORCS1
hsa-miR-198	NM_001142413	90.39	NA
hsa-miR-198	NM_001190791	51.9456	ZNF317
hsa-miR-198	NM_001042555	60.2551	FRS2
hsa-miR-198	NM_001195605	53.4405	ZNF865
hsa-miR-198	NM_001282791	75.1783	PUM2
hsa-miR-198	NM_001256214	60.1552	ATP1A3
hsa-miR-198	NM_032503	64.0479	MCHR2
hsa-miR-198	NM_001039753	57.4913	EML6
hsa-miR-198	NM_178155	82.3025	FUT8
hsa-miR-198	NM_001304998	77.7888	TMEM170A
hsa-miR-198	NM_016083	94.5043	CNR1
hsa-miR-198	NM_015317	75.1783	PUM2
hsa-miR-198	NM_001202522	52.9018	DDR1
hsa-miR-198	NM_138799	63.1219	MBOAT2
hsa-miR-198	NM_001324183	61.898	SH3GL3
hsa-miR-198	NM_001286780	53.3172	ANTXR2
hsa-miR-198	NM_152620	84.4668	TRIM60
hsa-miR-198	NM_001014797	50.6701	KCNMA1
hsa-miR-198	NM_001324226	61.6664	STOML1
hsa-miR-198	NM_004227	60.1611	CYTH3
hsa-miR-198	NM_001320451	57.2721	RPL22L1
hsa-miR-198	NM_001033561	66.3667	PHF12
hsa-miR-198	NM_002960	57.2797	S100A3
hsa-miR-198	NM_003469	86.0383	SCG2
hsa-miR-198	NM_001322380	93.6364	ENTPD6
hsa-miR-198	NM_015085	64.7773	RAP1GAP2
hsa-miR-198	NM_020465	51.4687	NDRG4
hsa-miR-198	NM_001259	55.5705	CDK6
hsa-miR-198	NM_001308210	57.8616	TSHZ1
hsa-miR-198	NM_006814	77.3327	PSMF1
hsa-miR-198	NM_001112736	81.9823	TASOR
hsa-miR-198	NM_004090	76.328	DUSP3
hsa-miR-198	NM_001099653	70.6488	NA
hsa-miR-198	NM_001008566	55.5935	TPST2
hsa-miR-198	NM_002505	57.288	NFYA
hsa-miR-198	NM_001290270	58.2712	LILRA2
hsa-miR-198	NM_016209	51.4738	TRAPPC2L
hsa-miR-198	NM_001318530	51.4738	TRAPPC2L
hsa-miR-198	NM_001172504	92.8479	SLC6A2
hsa-miR-198	NM_001309883	53.6109	GNAS
hsa-miR-198	NM_001321038	69.6916	GPSM2
hsa-miR-198	NM_001174160	52.1159	SH2D4A
hsa-miR-198	NM_001271732	56.9406	YIPF5
hsa-miR-198	NM_001319080	84.3408	HMGA1
hsa-miR-198	NM_001286239	84.1537	SPATA6
hsa-miR-198	NM_016649	89.3292	ESF1
hsa-miR-198	NM_001308170	62.2563	AMPD2
hsa-miR-198	NM_001324227	61.6664	STOML1
hsa-miR-198	NM_001319077	87.0699	HMGA1
hsa-miR-198	NM_001303281	51.5419	ZNF18
hsa-miR-198	NM_004561	70.9742	OVOL1
hsa-miR-198	NM_001304332	56.9721	PPFIA4
hsa-miR-198	NM_001160148	59.884	DDHD1
hsa-miR-198	NM_001318022	67.721	OR2H1
hsa-miR-198	NM_012311	61.4461	KIN
hsa-miR-198	NM_002053	50	GBP1
hsa-miR-198	NM_145010	53.1648	ENKUR
hsa-miR-198	NM_001290215	89.219	CTBP2
hsa-miR-198	NM_001243771	94.9485	APH1A
hsa-miR-198	NM_001324182	76.9147	SH3GL3
hsa-miR-198	NM_001035267	85.7782	RPL41
hsa-miR-198	NM_001166279	61.806	PAN2
hsa-miR-198	NM_001098783	76.1282	RPP14
hsa-miR-198	NM_001301733	91.8724	COA6
hsa-miR-198	NM_182492	50	NA
hsa-miR-198	NM_015310	77.9116	PSD3
hsa-miR-198	NM_001131062	56.9107	SAP30L
hsa-miR-198	NM_001282766	60.7874	POLR1E
hsa-miR-198	NM_178860	56.6127	SEZ6
hsa-miR-198	NM_001243788	53.7584	SMUG1
hsa-miR-198	NM_001270728	60.5078	BCL2L13
hsa-miR-198	NM_015833	80.6633	ADARB1
hsa-miR-198	NM_001031806	62.7476	ALDH3A2
hsa-miR-198	NM_001288973	68.5677	ADAM12
hsa-miR-198	NM_002658	76.4967	PLAU
hsa-miR-198	NM_007156	67.9398	ZXDA
hsa-miR-198	NM_001190267	79.6755	ATG16L1
hsa-miR-198	NM_014351	75.9346	SULT4A1
hsa-miR-198	NM_001317182	80.1047	METAP2
hsa-miR-198	NM_001184734	50.7579	ASTN2
hsa-miR-198	NM_001322383	96.3353	ENTPD6
hsa-miR-198	NM_001323407	78.7755	PSMF1
hsa-miR-198	NM_001100398	79.0323	RAP1GAP2
hsa-miR-198	NM_015897	59.549	PIAS4
hsa-miR-198	NM_014789	59.5464	ZNF623
hsa-miR-198	NM_020869	50	DCDC1
hsa-miR-198	NM_001290202	56.6127	SEZ6
hsa-miR-198	NM_001035260	59.9855	VPS26A
hsa-miR-198	NM_178135	84.5266	HSD17B13
hsa-miR-198	NM_002035	63.597	KDSR
hsa-miR-198	NM_001308392	59.2129	CDH11
hsa-miR-198	NM_022490	60.7874	POLR1E
hsa-miR-198	NM_145321	56.0441	OSBPL3
hsa-miR-198	NM_001163547	51.6282	SYNRG
hsa-miR-198	NM_152283	89.1461	ZFP62
hsa-miR-198	NM_001301108	61.898	SH3GL3
hsa-miR-198	NM_001243996	85.6726	RYR3
hsa-miR-198	NM_001199770	98.7017	OTX1
hsa-miR-198	NM_014384	71.1841	ACAD8
hsa-miR-198	NM_001875	67.0748	CPS1
hsa-miR-198	NM_022910	51.4687	NDRG4
hsa-miR-198	NM_000245	74.1181	MET
hsa-miR-198	NM_022127	53.1636	SLC28A3
hsa-miR-198	NM_198993	80.0815	STAC2
hsa-miR-198	NM_001130831	65.6056	GAS7
hsa-miR-198	NM_001256598	73.7677	PPDPFL
hsa-miR-198	NM_001195622	76.7652	TOPORS
hsa-miR-198	NM_002088	55.9739	GRIK5
hsa-miR-198	NM_001323409	77.2851	PSMF1
hsa-miR-198	NM_016598	65.6521	ZDHHC3
hsa-miR-198	NM_001077180	62.263	METTL9
hsa-miR-198	NM_014871	61.806	PAN2
hsa-miR-198	NM_001319081	84.3408	HMGA1
hsa-miR-198	NM_001004312	50.6374	RTP2
hsa-miR-198	NM_001258248	63.0075	SP6
hsa-miR-198	NM_001039360	72.5206	ZBTB7C
hsa-miR-198	NM_001322835	50.6701	KCNMA1
hsa-miR-198	NM_001288659	62.263	METTL9
hsa-miR-198	NM_145320	56.0441	OSBPL3
hsa-miR-198	NM_001202523	52.9018	DDR1
hsa-miR-198	NM_052846	51.0428	EMILIN3
hsa-miR-198	NM_016025	62.263	METTL9
hsa-miR-198	NM_001164182	57.9122	ENTPD1
hsa-miR-198	NM_080821	66.3953	FAM210B
hsa-miR-198	NM_004658	56.2736	RASAL1
hsa-miR-198	NM_001308068	71.4905	FLYWCH1
hsa-miR-198	NM_032143	50	ZRANB3
hsa-miR-198	NM_002131	84.3408	HMGA1
hsa-miR-198	NM_001286490	50.9929	FRMD5
hsa-miR-198	NM_014603	51.6678	CDR2L
hsa-miR-198	NM_001300791	57.9273	KIF3A
hsa-miR-198	NM_000217	54.4857	KCNA1
hsa-miR-198	NM_001130527	56.4537	SPAG9
hsa-miR-198	NM_001270523	89.782	OTX2
hsa-miR-198	NM_014289	65.3979	CAPN6
hsa-miR-198	NM_001136257	62.1475	SGMS2
hsa-miR-198	NM_001256272	64.104	VSX1
hsa-miR-198	NM_145902	84.3408	HMGA1
hsa-miR-198	NM_052918	52.0881	SORCS1
hsa-miR-198	NM_001441	56.137	FAAH
hsa-miR-198	NM_001098722	63.1927	GNG4
hsa-miR-198	NM_001243532	52.6358	PDIK1L
hsa-miR-198	NM_001193363	62.9362	EXD2
hsa-miR-198	NM_001278351	60.2551	FRS2
hsa-miR-198	NM_001244963	50.0477	NAV2
hsa-miR-198	NM_001322829	50.6701	KCNMA1
hsa-miR-198	NM_001164270	85.8933	RAD51
hsa-miR-198	NM_001134659	79.8282	PRR23A
hsa-miR-198	NM_001136194	78.0106	FASTKD2
hsa-miR-198	NM_001321945	65.6895	FGF14
hsa-miR-198	NM_001297707	67.9999	CAMSAP2
hsa-miR-198	NM_001207064	68.1967	CXADR
hsa-miR-198	NM_001287191	86.882	FSD1L
hsa-miR-198	NM_144680	51.5419	ZNF18
hsa-miR-198	NM_001160147	59.884	DDHD1
hsa-miR-198	NM_000635	89.7963	RFX2
hsa-miR-198	NM_001005366	53.8625	KDM2B
hsa-miR-198	NM_001322392	93.6364	ENTPD6
hsa-miR-198	NM_003659	75.0501	AGPS
hsa-miR-198	NM_001247	96.3353	ENTPD6
hsa-miR-198	NM_080836	53.5006	STK35
hsa-miR-198	NM_006887	86.5125	ZFP36L2
hsa-miR-198	NM_014949	61.3301	KHDC4
hsa-miR-198	NM_001287192	86.882	FSD1L
hsa-miR-198	NM_001251971	56.4537	SPAG9
hsa-miR-198	NM_001319967	60.6823	NLRP2B
hsa-miR-198	NM_001963	62.8685	EGF
hsa-miR-198	NM_001321936	65.6895	FGF14
hsa-miR-198	NM_001320898	50	CAMK2G
hsa-miR-198	NM_001184880	50	PCDH19
hsa-miR-198	NM_001256549	55.4676	PCGF5
hsa-miR-198	NM_148170	66.1638	CTSC
hsa-miR-198	NM_001005339	59.3517	RGS10
hsa-miR-198	NM_001320916	58.2588	ENTPD1
hsa-miR-198	NM_007247	51.6282	SYNRG
hsa-miR-198	NM_001308108	80.7231	SNCAIP
hsa-miR-198	NM_000333	65.0885	ATXN7
hsa-miR-198	NM_001111018	50.0477	NAV2
hsa-miR-198	NM_015567	87.5809	SLITRK5
hsa-miR-198	NM_001322384	96.3353	ENTPD6
hsa-miR-198	NM_178831	53.0437	NA
hsa-miR-198	NM_001012985	91.8724	COA6
hsa-miR-198	NM_001322385	96.3353	ENTPD6
hsa-miR-198	NM_001003792	91.6296	RBMS3
hsa-miR-198	NM_001797	65.2645	CDH11
hsa-miR-198	NM_173698	50.9707	FAM133A
hsa-miR-198	NM_005373	52.5578	MPL
hsa-miR-198	NM_001007271	59.0067	DUSP13A
hsa-miR-198	NM_152563	70.6488	NA
hsa-miR-198	NM_001003895	85.9292	CDY1B
hsa-miR-198	NM_017523	59.2957	XAF1
hsa-miR-198	NM_004680	85.9292	CDY1
hsa-miR-198	NM_001145313	86.882	FSD1L
hsa-miR-198	NM_001941	68.9852	DSC3
hsa-miR-198	NM_001426	73.0769	EN1
hsa-miR-198	NM_144969	61.2873	ZDHHC15
hsa-miR-198	NM_001282789	82.645	GARIN1B
hsa-miR-198	NM_001303545	92.3533	VBP1
hsa-miR-198	NM_001178079	85.4275	STAT6
hsa-miR-198	NM_005779	74.4049	LHFPL2
hsa-miR-198	NM_001040151	55.8296	SCN3B
hsa-miR-198	NM_005865	81.9311	PRSS16
hsa-miR-198	NM_024933	51.6397	ANKRD53
hsa-miR-198	NM_006866	58.2712	LILRA2
hsa-miR-198	NM_003326	85.9696	TNFSF4
hsa-miR-198	NM_001306072	61.5301	PRAMEF25
hsa-miR-198	NM_004879	91.3209	EI24
hsa-miR-198	NM_001329	89.219	CTBP2
hsa-miR-198	NM_001204961	88.389	PBX1
hsa-miR-198	NM_001321946	65.6895	FGF14
hsa-miR-198	NM_005783	90.6273	TXNDC9
hsa-miR-198	NM_001324228	61.6664	STOML1
hsa-miR-198	NM_145049	65.1011	UBLCP1
hsa-miR-198	NM_033081	65.4432	DIDO1
hsa-miR-198	NM_001130071	51.343	EPN1
hsa-miR-198	NM_002013	65.2215	FKBP3
hsa-miR-198	NM_001136193	78.0106	FASTKD2
hsa-miR-198	NM_001271833	89.7071	DENND2D
hsa-miR-198	NM_030641	56.5092	APOL6
hsa-miR-198	NM_001013407	61.6242	PRAMEF5
hsa-miR-198	NM_001257360	62.2563	NA
hsa-miR-198	NM_007054	57.9273	KIF3A
hsa-miR-198	NM_021728	85.3118	OTX2
hsa-miR-198	NM_001195296	56.0922	MIPOL1
hsa-miR-198	NM_001271592	67.705	SMIM10L1
hsa-miR-198	NM_006323	76.5547	SEC24B
hsa-miR-198	NM_182964	50.0477	NAV2
hsa-miR-198	NM_001256071	62.813	RNF213
hsa-miR-198	NM_001142547	85.3012	RPUSD3
hsa-miR-198	NM_001164181	57.9122	ENTPD1
hsa-miR-198	NM_198392	80.6216	TCF21
hsa-miR-198	NM_001243787	53.7584	SMUG1
hsa-miR-198	NM_001321417	68.9572	USHBP1
hsa-miR-198	NM_001130060	56.7872	ATF7
hsa-miR-198	NM_003482	64.5768	KMT2D
hsa-miR-198	NM_001303128	59.1403	DNAJC5G
hsa-miR-198	NM_001042734	76.5547	SEC24B
hsa-miR-198	NM_007034	76.7151	DNAJB4
hsa-miR-198	NM_031941	69.2913	USHBP1
hsa-miR-198	NM_001293628	61.0874	PAPOLA
hsa-miR-198	NM_175929	65.6895	FGF14
hsa-miR-198	NM_001303544	92.3533	VBP1
hsa-miR-198	NM_001318532	51.4738	TRAPPC2L
hsa-miR-198	NM_001322379	96.3353	ENTPD6
hsa-miR-198	NM_020431	52.4609	TMEM63C
hsa-miR-198	NM_001039840	79.3001	CHIC1
hsa-miR-198	NM_014060	59.7319	MCTS1
hsa-miR-198	NM_001317101	76.7151	DNAJB4
hsa-miR-198	NM_002630	94.3121	PGC
hsa-miR-198	NM_003644	65.6056	GAS7
hsa-miR-198	NM_001193520	56.2736	RASAL1
hsa-miR-198	NM_020311	56.9246	ACKR3
hsa-miR-198	NM_002926	98.5833	RGS12
hsa-miR-198	NM_001322391	96.3353	ENTPD6
hsa-miR-198	NM_001321938	65.6895	FGF14
hsa-miR-198	NM_001130917	58.2712	LILRA2
hsa-miR-198	NM_001242836	51.4687	NDRG4
hsa-miR-198	NM_015023	51.6995	WDTC1
hsa-miR-198	NM_152783	54.2947	D2HGDH
hsa-miR-198	NM_001323005	55.1906	AFG1L
hsa-miR-198	NM_004733	50	SLC33A1
hsa-miR-198	NM_004501	63.3844	HNRNPU
hsa-miR-198	NM_016032	57.0276	ZDHHC9
hsa-miR-198	NM_001098721	63.1927	GNG4
hsa-miR-198	NM_024569	77.7488	MPZL1
hsa-miR-198	NM_001173977	61.1661	CARMIL1
hsa-miR-198	NM_001034173	66.6918	ALDH1L2
hsa-miR-198	NM_001278683	84.0104	AMOTL2
hsa-miR-198	NM_001297562	85.9696	TNFSF4
hsa-miR-198	NM_003372	92.3533	VBP1
hsa-miR-198	NM_001323408	78.7755	PSMF1
hsa-miR-198	NM_012285	88.746	KCNH4
hsa-miR-198	NM_001256213	76.5897	ATP1A3
hsa-miR-198	NM_016938	51.5602	EFEMP2
hsa-miR-198	NM_138457	50.969	FOXP4
hsa-miR-198	NM_001308109	52.0226	SNCAIP
hsa-miR-198	NM_001127460	61.806	PAN2
hsa-miR-198	NM_033141	68.9532	MAP3K9
hsa-miR-198	NM_014747	53.2891	RIMS3
hsa-miR-198	NM_001174159	52.1159	SH2D4A
hsa-miR-198	NM_001317100	76.7151	NA
hsa-miR-198	NM_001322386	96.3353	ENTPD6
hsa-miR-198	NM_203301	50	FBXO33
hsa-miR-198	NM_001003793	91.6296	RBMS3
hsa-miR-198	NM_003971	56.4537	SPAG9
hsa-miR-198	NM_178578	77.3327	PSMF1
hsa-miR-198	NM_001039716	57.9488	DIO1
hsa-miR-198	NM_004975	50.8911	KCNB1
hsa-miR-198	NM_001164342	68.7201	ZBTB20
hsa-miR-198	NM_001324316	57.9488	DIO1
hsa-miR-198	NM_024915	56.0296	GRHL2
hsa-miR-198	NM_001172425	55.3087	LEFTY2
hsa-miR-198	NM_030883	67.721	OR2H1
hsa-miR-198	NM_001282790	75.1783	PUM2
hsa-miR-198	NM_145899	84.3408	HMGA1
hsa-miR-198	NM_153686	65.6698	LCORL
hsa-miR-198	NM_001321931	65.6895	FGF14
hsa-miR-198	NM_005802	76.7652	TOPORS
hsa-miR-198	NM_173650	59.1001	DNAJC5G
hsa-miR-198	NM_198187	51.1351	ASTN2
hsa-miR-198	NM_003953	77.9747	MPZL1
hsa-miR-198	NM_001195528	65.8752	TPBGL
hsa-miR-198	NM_032812	93.2292	PLXDC2
hsa-miR-198	NM_001013635	56.7607	CCDC184
hsa-miR-198	NM_005443	56.4248	PAPSS1
hsa-miR-198	NM_000314	75.6475	PTEN
hsa-miR-198	NM_001178008	83.3874	CBS
hsa-miR-198	NM_002204	68.6339	ITGA3
hsa-miR-198	NM_001164269	86.0626	RAD51
hsa-miR-198	NM_001324229	61.6664	STOML1
hsa-miR-198	NM_001013031	52.8522	SORCS1
hsa-miR-198	NM_001257361	62.2563	AMPD2
hsa-miR-198	NM_001010889	63.3714	PRAMEF6
hsa-miR-198	NM_001177711	91.6296	RBMS3
hsa-miR-198	NM_015335	61.9094	MED13L
hsa-miR-198	NM_005461	61.7979	MAFB
hsa-miR-198	NM_001142648	84.1509	SAR1A
hsa-miR-198	NM_001172440	61.9543	ENDOU
hsa-miR-198	NM_006756	88.4244	TCEA1
hsa-miR-198	NM_001256677	61.6664	STOML1
hsa-miR-198	NM_001142497	54.2204	MLKL
hsa-miR-198	NM_033199	59.8829	UCN2
hsa-miR-198	NM_001178078	91.9152	STAT6
hsa-miR-198	NM_014929	78.0106	FASTKD2
hsa-miR-198	NM_001146341	58.3093	ANKRD34C
hsa-miR-198	NM_001308100	54.2647	SNCAIP
hsa-miR-198	NM_001318945	60.1033	VPS26A
hsa-miR-198	NM_004288	60.362	CYTIP
hsa-miR-198	NM_152376	50.6427	UBXN10
hsa-miR-198	NM_001322398	96.3353	ENTPD6
hsa-miR-198	NM_001008539	51.7316	SLC7A2
hsa-miR-198	NM_001036	85.6726	RYR3
hsa-miR-198	NM_001207063	68.1967	CXADR
hsa-miR-198	NM_001270	84.7053	CHD1
hsa-miR-198	NM_001319082	84.3408	HMGA1
hsa-miR-198	NM_001321266	63.1219	MBOAT2
hsa-miR-198	NM_032558	83.1156	MFSD14B
hsa-miR-198	NM_014584	51.4452	ERO1A
hsa-miR-198	NM_014631	73.0987	SH3PXD2A
hsa-miR-198	NM_139284	65.3841	LGI4
hsa-miR-198	NM_001300731	72.4457	AMBRA1
hsa-miR-198	NM_001146191	77.9747	MPZL1
hsa-miR-198	NM_001145306	55.5705	CDK6
hsa-miR-198	NM_004096	72.9716	EIF4EBP2
hsa-miR-198	NM_001114173	66.2289	CTSC
hsa-miR-198	NM_001242487	60.7856	ZSWIM8
hsa-miR-198	NM_001338	68.2784	CXADR
hsa-miR-198	NM_145117	50.0477	NAV2
hsa-miR-198	NM_001142645	82.2578	NEMP2
hsa-miR-198	NM_001306070	68.7636	MBNL2
hsa-miR-198	NM_001321932	65.6895	FGF14
hsa-miR-198	NM_001318528	51.4738	TRAPPC2L
hsa-miR-198	NM_001270401	73.3269	RXRB
hsa-miR-198	NM_001322255	63.5316	KNCN
hsa-miR-198	NM_172005	51.7307	WFDC13
hsa-miR-198	NM_001282788	82.645	GARIN1B
hsa-miR-198	NM_000071	83.3874	CBS
hsa-miR-198	NM_020933	51.9456	ZNF317
hsa-miR-198	NM_001324186	61.898	SH3GL3
hsa-miR-198	NM_001282531	50.8577	ADNP
hsa-miR-198	NM_001242833	51.4687	NDRG4
hsa-miR-198	NM_001286554	66.2643	USP49
hsa-miR-198	NM_001099415	50	POM121C
hsa-miR-198	NM_003027	61.898	SH3GL3
hsa-miR-198	NM_001321941	65.6895	FGF14
hsa-miR-198	NM_001277783	85.634	ATG12
hsa-miR-198	NM_002739	59.5475	PRKCG
hsa-miR-198	NM_014979	57.4698	SV2C
hsa-miR-198	NM_001303127	59.1001	DNAJC5G
hsa-miR-198	NM_007011	54.8302	ABHD2
hsa-miR-198	NM_015339	50.8577	ADNP
hsa-miR-198	NM_032532	51.5939	FNDC1
hsa-miR-198	NM_000019	71.042	ACAT1
hsa-miR-198	NM_145254	77.7888	TMEM170A
hsa-miR-198	NM_001271534	58.7897	DSCAM
hsa-miR-198	NM_005386	62.258	NNAT
hsa-miR-198	NM_001282622	95.8874	KDM5C
hsa-miR-198	NM_001206836	93.7243	RAB11A
hsa-miR-198	NM_001144893	79.6939	CD209
hsa-miR-198	NM_004226	72.162	STK17B
hsa-miR-198	NM_001315507	73.1163	PCM1
hsa-miR-198	NM_003392	67.8345	WNT5A
hsa-miR-198	NM_001112	80.6633	ADARB1
hsa-miR-198	NM_001111019	50.0477	NAV2
hsa-miR-198	NM_001193369	65.4432	DIDO1
hsa-miR-198	NM_001256673	61.6664	STOML1
hsa-miR-198	NM_001322393	93.6364	ENTPD6
hsa-miR-198	NM_016200	55.0565	LSM8
hsa-miR-198	NM_001322387	96.3353	ENTPD6
hsa-miR-198	NM_002253	65.6599	KDR
hsa-miR-198	NM_002107	96.1883	H3-3A
hsa-miR-198	NM_015204	63.3705	THSD7A
hsa-miR-198	NM_006856	56.7872	ATF7
hsa-miR-198	NM_001002758	91.0827	PRY2
hsa-miR-198	NM_001321939	65.6895	FGF14
hsa-miR-198	NM_197955	72.8196	C15orf48
hsa-miR-198	NM_201433	65.6056	GAS7
hsa-miR-198	NM_018206	50.5021	VPS35
hsa-miR-198	NM_018710	79.041	PIP4P2
hsa-miR-198	NM_005121	53.2181	MED13
hsa-miR-198	NM_001322394	96.3353	ENTPD6
hsa-miR-198	NM_001321948	65.6895	FGF14
hsa-miR-198	NM_001243772	96.9454	APH1A
hsa-miR-198	NM_006218	88.7312	PIK3CA
hsa-miR-198	NM_206967	60.6338	C16orf74
hsa-miR-198	NM_001776	57.9122	ENTPD1
hsa-miR-198	NM_002585	84.3517	PBX1
hsa-miR-198	NM_004676	91.0827	PRY
hsa-miR-198	NM_001243533	52.6358	PDIK1L
hsa-miR-198	NM_001083537	51.9523	FAM86B1
hsa-miR-198	NM_001317102	76.7151	DNAJB4
hsa-miR-198	NM_017943	60.5148	FBXO34
hsa-miR-198	NM_020218	59.4699	NA
hsa-miR-198	NM_001171109	50.9707	FAM133A
hsa-miR-198	NM_001082480	59.5464	ZNF623
hsa-miR-198	NM_005399	51.2236	PRKAB2
hsa-miR-198	NM_024721	81.9412	ZFHX4
hsa-miR-198	NM_001261843	59.5464	ZNF623
hsa-miR-198	NM_006425	86.6274	SLU7
hsa-miR-198	NM_015912	67.1966	FAM135B
hsa-miR-198	NM_001114089	96.3353	ENTPD6
hsa-miR-198	NM_001164183	57.9122	ENTPD1
hsa-miR-198	NM_001077628	96.9454	APH1A
hsa-miR-198	NM_207318	78.8057	FAM199X
hsa-miR-198	NM_001083914	93.7143	CTBP2
hsa-miR-198	NM_001159596	56.5053	BIVM
hsa-miR-198	NM_000202	62.2886	IDS
hsa-miR-198	NM_013266	61.8502	CTNNA3
hsa-miR-198	NM_001042705	68.6205	IQCJ
hsa-miR-198	NM_001136485	76.6766	C11orf86
hsa-miR-198	NM_006037	50.2973	HDAC4
hsa-miR-198	NM_145322	56.0441	OSBPL3
hsa-miR-198	NM_001013619	66.3131	HYKK
hsa-miR-198	NM_001286569	50	ZRANB3
hsa-miR-198	NM_001271518	50.6701	KCNMA1
hsa-miR-198	NM_001271815	85.0111	NOX1
hsa-miR-198	NM_001319179	50	GBP3
hsa-miR-198	NM_004329	74.1767	BMPR1A
hsa-miR-198	NM_015550	56.0441	OSBPL3
hsa-miR-198	NM_001164522	69.0552	RAB7B
hsa-miR-198	NM_001282752	89.2058	PUM2
hsa-miR-198	NM_001318529	51.4738	TRAPPC2L
hsa-miR-198	NM_001321933	65.6895	FGF14
hsa-miR-198	NM_001034025	75.9193	ERP29
hsa-miR-198	NM_021976	50	RXRB
hsa-miR-198	NM_001178009	84.3794	CBS
hsa-miR-198	NM_001282532	50.8577	ADNP
hsa-miR-198	NM_001035	83.6092	RYR2
hsa-miR-198	NM_001199633	53.1636	SLC28A3
hsa-miR-198	NM_001098635	56.6693	SEZ6
hsa-miR-198	NM_001163544	51.6282	SYNRG
hsa-miR-198	NM_004874	52.1588	BAG4
hsa-miR-198	NM_002141	57.388	HOXA4
hsa-miR-198	NM_016022	94.9485	APH1A
hsa-miR-198	NM_001242832	75.1438	ARFGAP2
hsa-miR-198	NM_001704	90.0807	ADGRB3
hsa-miR-198	NM_001321267	63.1219	MBOAT2
hsa-miR-198	NM_001145009	68.1014	BTN3A1
hsa-miR-198	NM_001199140	50.5136	AMMECR1L
hsa-miR-198	NM_001136498	60.1004	CISD3
hsa-miR-198	NM_002895	71.7918	RBL1
hsa-miR-198	NM_022802	89.219	CTBP2
hsa-miR-198	NM_001242785	68.6376	HLCS
hsa-miR-198	NM_001322388	93.6364	ENTPD6
hsa-miR-198	NM_001178080	85.4275	STAT6
hsa-miR-198	NM_032373	55.4676	PCGF5
hsa-miR-198	NM_178568	54.1132	RTN4RL1
hsa-miR-198	NM_138714	52.18	NFAT5
hsa-miR-198	NM_014553	51.2705	TFCP2L1
hsa-miR-198	NM_001242957	60.31	MAK
hsa-miR-198	NM_020766	50	PCDH19
hsa-miR-198	NM_001134650	76.9795	EIF4E3
hsa-miR-198	NM_001282798	53.5495	R3HDM1
hsa-miR-198	NM_001315508	73.1163	PCM1
hsa-miR-198	NM_033036	62.1673	GAL3ST3
hsa-miR-198	NM_001135731	57.6442	ZMAT4
hsa-miR-198	NM_001207065	68.0636	CXADR
hsa-miR-198	NM_001308105	52.0226	SNCAIP
hsa-miR-198	NM_001300792	57.9273	KIF3A
hsa-miR-198	NM_007052	85.0111	NOX1
hsa-miR-198	NM_001318525	51.4738	TRAPPC2L
hsa-miR-198	NM_001242784	68.6376	HLCS
hsa-miR-198	NM_018172	70.6488	NA
hsa-miR-198	NM_006654	60.2551	FRS2
hsa-miR-198	NM_001282918	60.6878	RALGAPB
hsa-miR-198	NM_152296	60.1552	ATP1A3
hsa-miR-198	NM_001293642	54.706	CA12
hsa-miR-198	NM_001321940	65.6895	FGF14
hsa-miR-198	NM_020935	57.9941	USP37
hsa-miR-198	NM_001130528	56.4537	SPAG9
hsa-miR-198	NM_004707	85.7929	ATG12
hsa-miR-198	NM_021218	64.7183	INIP
hsa-miR-198	NM_001319059	50	GSTA1
hsa-miR-198	NM_001206641	91.8724	COA6
hsa-miR-198	NM_001242385	60.31	MAK
hsa-miR-198	NM_003240	55.3087	LEFTY2
hsa-miR-198	NM_014911	69.4382	AAK1
hsa-miR-198	NM_001242935	54.2647	SNCAIP
hsa-miR-198	NM_001166550	62.2886	IDS
hsa-miR-198	NM_024632	56.9107	SAP30L
hsa-miR-198	NM_001172638	89.1461	ZFP62
hsa-miR-198	NM_153634	78.0673	CPNE8
hsa-miR-198	NM_001321947	65.6895	FGF14
hsa-miR-198	NM_001122634	67.0748	NA
hsa-miR-198	NM_001134363	90.5103	RBM20
hsa-miR-198	NM_001257101	55.4676	PCGF5
hsa-miR-198	NM_004124	72.4942	GMFB
hsa-miR-198	NM_001284232	68.9532	MAP3K9
hsa-miR-198	NM_001172439	61.9543	ENDOU
hsa-miR-198	NM_001142885	82.4616	TMOD2
hsa-miR-198	NM_001317103	76.2413	DNAJB4
hsa-miR-198	NM_001193361	62.9362	EXD2
hsa-miR-198	NM_001079812	63.3795	DIAPH1
hsa-miR-198	NM_001078171	54.6482	RTL8C
hsa-miR-198	NM_138713	52.18	NFAT5
hsa-miR-198	NM_001256105	67.8345	WNT5A
hsa-miR-198	NM_001270488	59.7182	TAF11
hsa-miR-198	NM_001256271	63.953	VSX1
hsa-miR-198	NM_012316	58.6041	KPNA6
hsa-miR-198	NM_001324187	61.898	SH3GL3
hsa-miR-198	NM_001284231	68.9532	MAP3K9
hsa-miR-198	NM_001276380	89.3292	ESF1
hsa-miR-198	NM_001256672	61.6664	STOML1
hsa-miR-198	NM_197941	64.3552	ADAMTS6
hsa-miR-198	NM_014369	50.0283	PTPN18
hsa-miR-198	NM_003595	55.5935	TPST2
hsa-miR-198	NM_006599	52.18	NFAT5
hsa-miR-198	NM_032599	82.645	GARIN1B
hsa-miR-198	NM_025239	70.0926	PDCD1LG2
hsa-miR-198	NM_001318524	51.4738	TRAPPC2L
hsa-miR-198	NM_152493	91.7096	ZNF362
hsa-miR-198	NM_003489	93.8716	NRIP1
hsa-miR-198	NM_001267783	72.4457	AMBRA1
hsa-miR-198	NM_145903	84.3408	HMGA1
hsa-miR-198	NM_020336	60.6878	RALGAPB
hsa-miR-198	NM_001193521	56.2736	RASAL1
hsa-miR-198	NM_001142370	50.0283	PTPN18
hsa-miR-198	NM_001322832	50.6701	KCNMA1
hsa-miR-198	NM_024813	86.0224	RPAP2
hsa-miR-198	NM_001954	52.9018	DDR1
hsa-miR-198	NM_014311	53.7584	SMUG1
hsa-miR-198	NM_007023	79.4649	RAPGEF4
hsa-miR-198	NM_013993	52.9018	DDR1
hsa-miR-198	NM_198571	54.2106	NAT16
hsa-miR-198	NM_198890	79.6755	ATG16L1
hsa-miR-198	NM_007189	90.0215	ABCF2
hsa-miR-198	NM_001204869	51.7015	CCN4
hsa-miR-198	NM_001202521	62.4794	DDR1
hsa-miR-198	NM_001304351	86.6968	ADAM28
hsa-miR-198	NM_002875	86.0626	RAD51
hsa-miR-198	NM_198541	68.6742	IGFL1
hsa-miR-198	NM_001304717	75.6475	PTEN
hsa-miR-198	NM_001319180	50	GBP3
hsa-miR-198	NM_001278187	54.7588	HERC4
hsa-miR-198	NM_014562	97.1706	OTX1
hsa-miR-198	NM_015107	58.2147	PHF8
hsa-miR-198	NM_172214	52.796	CAMKK2
hsa-miR-198	NM_145740	50	GSTA1
hsa-miR-198	NM_021705	57.288	NFYA
hsa-miR-198	NM_001218	54.706	CA12
hsa-miR-198	NM_024734	84.8802	CLMN
hsa-miR-198	NM_015185	53.2272	ARHGEF9
hsa-miR-198	NM_001558	80.0841	IL10RA
hsa-miR-198	NM_003153	85.4275	STAT6
hsa-miR-198	NM_003882	53.2256	CCN4
hsa-miR-198	NM_001276252	51.6995	WDTC1
hsa-miR-198	NM_001308106	52.0226	SNCAIP
hsa-miR-198	NM_001301109	61.898	SH3GL3
hsa-miR-198	NM_001321943	65.6895	FGF14
hsa-miR-198	NM_173659	85.3012	RPUSD3
hsa-miR-198	NM_018199	62.9362	EXD2
hsa-miR-198	NM_001322381	93.6364	ENTPD6
hsa-miR-198	NM_183238	64.8324	ZNF605
hsa-miR-198	NM_001014796	86.1333	DDR2
hsa-miR-198	NM_001317183	80.1047	METAP2
hsa-miR-198	NM_001206570	52.6773	SORCS1
hsa-miR-198	NM_001321014	89.219	CTBP2
hsa-miR-198	NM_003046	51.7316	SLC7A2
hsa-miR-198	NM_001256675	61.6664	STOML1
hsa-miR-198	NM_206925	54.706	CA12
hsa-miR-198	NM_001178131	62.8685	EGF
hsa-miR-198	NM_001321013	89.219	CTBP2
hsa-miR-198	NM_002445	85.0331	MSR1
hsa-miR-198	NM_004818	62.0047	DDX23
hsa-miR-198	NM_001146344	63.7637	PRAMEF11
hsa-miR-198	NM_000246	52.9681	CIITA
hsa-miR-198	NM_001282901	79.4649	RAPGEF4
hsa-miR-198	NM_001178081	85.4275	STAT6
hsa-miR-198	NM_175061	53.6665	JAZF1
hsa-miR-198	NM_032595	51.0963	PPP1R9B
hsa-miR-198	NM_001286781	53.3172	ANTXR2
hsa-miR-198	NM_001324402	74.1181	MET
hsa-miR-198	NM_203404	62.2563	NA
hsa-miR-198	NM_207304	68.7636	MBNL2
hsa-miR-198	NM_001288660	62.263	METTL9
hsa-miR-198	NM_001304718	92.8824	PTEN
hsa-miR-198	NM_001024947	56.9406	YIPF5
hsa-miR-198	NM_001195297	56.0922	MIPOL1
hsa-miR-198	NM_017974	79.6755	ATG16L1
hsa-miR-198	NM_001318841	72.5206	ZBTB7C
hsa-miR-198	NM_001173479	53.2272	ARHGEF9
hsa-miR-198	NM_001004334	65.0486	GPR179
hsa-miR-198	NM_001324184	61.898	SH3GL3
hsa-miR-198	NM_001318526	51.4738	TRAPPC2L
hsa-miR-198	NM_006360	67.7614	EIF3M
hsa-miR-198	NM_001127500	74.1181	MET
hsa-miR-198	NM_005643	60.5072	TAF11
hsa-miR-198	NM_018085	58.9374	IPO9
hsa-miR-198	NM_001008393	75.4607	C4orf46
hsa-miR-198	NM_080829	55.582	RIPOR3
hsa-miR-198	NM_024901	79.2763	DENND2D
hsa-miR-198	NM_014339	55.1898	IL17RA
hsa-miR-198	NM_001137554	59.7319	MCTS1
hsa-miR-198	NM_004115	65.6895	FGF14
hsa-miR-198	NM_020762	87.7742	SRGAP1
hsa-miR-198	NM_001033081	76.3797	MYCL
hsa-miR-198	NM_013994	52.9018	DDR1
hsa-miR-198	NM_001282900	79.4649	RAPGEF4
hsa-miR-198	NM_004112	82.8442	FGF11
hsa-miR-198	NM_001171110	50.9707	FAM133A
hsa-miR-198	NM_030803	79.6755	ATG16L1
hsa-miR-198	NM_001303460	82.8442	FGF11
hsa-miR-198	NM_001193360	62.9362	EXD2
hsa-miR-198	NM_001321825	76.1523	FIGN
hsa-miR-198	NM_058172	53.3172	ANTXR2
hsa-miR-198	NM_001278356	60.2551	FRS2
hsa-miR-198	NM_004809	61.6664	STOML1
hsa-miR-198	NM_152835	52.6358	PDIK1L
hsa-miR-198	NM_001293632	61.0874	PAPOLA
hsa-miR-198	NM_001012426	50.969	FOXP4
hsa-miR-198	NM_001164178	57.9122	ENTPD1
hsa-miR-198	NM_001202439	69.0271	NCR3LG1
hsa-miR-198	NM_138731	56.0922	MIPOL1
hsa-miR-198	NM_001284230	68.9532	MAP3K9
hsa-miR-198	NM_020846	62.8772	SLAIN2
hsa-miR-198	NM_003474	68.5677	ADAM12
hsa-miR-198	NM_001278357	60.2551	FRS2
hsa-miR-198	NM_001163546	51.6282	SYNRG
hsa-miR-198	NM_032389	75.1438	ARFGAP2
hsa-miR-198	NM_001098376	61.5418	PRAMEF15
hsa-miR-198	NM_207386	51.9048	SHISA6
hsa-miR-198	NM_001322396	93.6364	ENTPD6
hsa-miR-198	NM_199139	59.2957	XAF1
hsa-miR-198	NM_001267782	72.4457	AMBRA1
hsa-miR-198	NM_144778	80.8004	MBNL2
hsa-miR-198	NM_001242885	71.1609	NA
hsa-miR-198	NM_006516	60.813	SLC2A1
hsa-miR-198	NM_001134367	78.5331	SLC6A6
hsa-miR-198	NM_001001938	90.39	NA
hsa-miR-198	NM_001290268	55.582	RIPOR3
hsa-miR-198	NM_014810	81.8245	CEP350
hsa-miR-198	NM_001173461	51.9048	SHISA6
hsa-miR-198	NM_001122633	67.0748	CPS1
hsa-miR-198	NM_001197100	68.6205	IQCJ
hsa-miR-198	NM_001145031	76.4967	PLAU
hsa-miR-198	NM_018284	50	GBP3
hsa-miR-198	NM_001131063	56.9107	SAP30L
hsa-miR-198	NM_001308107	52.0226	SNCAIP
hsa-miR-198	NM_001303252	82.1425	MAPK12
hsa-miR-198	NM_000411	68.6376	HLCS
hsa-miR-198	NM_080550	51.6282	SYNRG
hsa-miR-198	NM_002160	90.952	TNC
hsa-miR-198	NM_017693	56.5053	BIVM
hsa-miR-198	NM_032413	72.8196	C15orf48
hsa-miR-198	NM_001314007	61.2705	DIAPH1
hsa-miR-198	NM_001163545	51.6282	SYNRG
hsa-miR-198	NM_001256674	61.6664	STOML1
hsa-miR-198	NM_001126111	71.6782	OSGIN2
hsa-miR-198	NM_007042	76.1282	RPP14
hsa-miR-198	NM_001321073	84.3794
hsa-miR-198	NM_134433	89.7963	RFX2
hsa-miR-198	NM_173824	67.1849	C3orf38
hsa-miR-198	NM_006838	80.1047	METAP2
hsa-miR-198	NM_001099645	57.2721	RPL22L1
hsa-miR-198	NM_001012427	50.969	FOXP4
hsa-miR-198	NM_181689	62.258	NNAT
hsa-miR-198	NM_172215	52.796	CAMKK2
hsa-miR-198	NM_001282899	79.4649	RAPGEF4
hsa-miR-198	NM_032632	61.0874	PAPOLA
hsa-miR-198	NM_018431	61.1019	DOK5
hsa-miR-198	NM_031936	51.3049	GPR61
hsa-miR-198	NM_138458	64.5936	DNAAF10
hsa-miR-198	NM_001129993	69.545	SANBR
hsa-miR-198	NM_001297652	52.9018	DDR1
hsa-miR-198	NM_030637	59.884	DDHD1
hsa-miR-198	NM_001303282	51.5419	ZNF18
hsa-miR-198	NM_001321942	65.6895	FGF14
hsa-miR-198	NM_001324230	61.6664	STOML1
hsa-miR-198	NM_001100397	90.797	RAPGEF4
hsa-miR-198	NM_138433	57.2948	KLHDC7B
hsa-miR-198	NM_001204870	53.2256	CCN4
hsa-miR-198	NM_153234	60.8917	LIX1
hsa-miR-198	NM_001190326	79.0358	DGCR8
hsa-miR-198	NM_004992	60.9545	MECP2
hsa-miR-198	NM_199289	51.1319	NEK5
hsa-miR-198	NM_001297654	52.9018	DDR1
hsa-miR-198	NM_032458	73.7645	PHF6
hsa-miR-198	NM_001160226	88.08	CNR1
hsa-miR-198	NM_001276318	60.3972	PPP1R3E
hsa-miR-198	NM_001304839	69.0552	RAB7B
hsa-miR-198	NM_002049	56.5601	GATA1
hsa-miR-198	NM_017749	72.4457	AMBRA1
hsa-miR-198	NM_013955	85.0111	NOX1
hsa-miR-198	NM_032569	71.6531	GLYR1
hsa-miR-198	NM_004480	82.3025	FUT8
hsa-miR-198	NM_001320298	83.3874	CBS
hsa-miR-198	NM_006741	71.9171	PPP1R1A
hsa-miR-198	NM_001318527	51.4738	TRAPPC2L
hsa-miR-198	NM_001098175	57.9122	ENTPD1
hsa-miR-198	NM_001004358	88.7835	FGFRL1
hsa-miR-198	NM_001098833	72.2709	NA
hsa-miR-198	NM_001270524	85.3118	OTX2
hsa-miR-198	NM_001282736	93.2292	PLXDC2
hsa-miR-198	NM_139156	62.2563	AMPD2
hsa-miR-198	NM_001321012	89.219	CTBP2
hsa-miR-198	NM_173464	56.8931	L3MBTL4
hsa-miR-198	NM_004786	51.5992	TXNL1
hsa-miR-198	NM_000944	64.1289	PPP3CA
hsa-miR-198	NM_001193362	62.9362	EXD2
hsa-miR-198	NM_001318085	76.5547	SEC24B
hsa-miR-198	NM_001288614	62.6095	CST3
hsa-miR-198	NM_003043	60.4657	SLC6A6
hsa-miR-198	NM_001293627	61.0874	PAPOLA
hsa-miR-198	NM_001301268	65.0218	INAFM2
hsa-miR-198	NM_019073	84.1537	SPATA6
hsa-miR-198	NM_001323410	78.7515	PSMF1
hsa-miR-198	NM_002268	66.448	KPNA4
hsa-miR-198	NM_172337	85.3118	OTX2
hsa-miR-198	NM_021013	58.4028	NA
hsa-miR-198	NM_001190992	56.6782	SLC33A1
hsa-miR-198	NM_001105243	50	PCDH19
hsa-miR-198	NM_001270525	85.3118	OTX2
hsa-miR-198	NM_004187	95.8874	KDM5C
hsa-miR-198	NM_152600	54.2098	ZNF579
hsa-miR-198	NM_021104	54.1691	RPL41
hsa-miR-198	NM_001297703	68.9572	USHBP1
hsa-miR-198	NM_001291989	50	RXRB
hsa-miR-198	NM_033181	88.08	CNR1
hsa-miR-198	NM_000614	65.4072	CNTF
hsa-miR-198	NM_014899	51.4622	RHOBTB3
hsa-miR-198	NM_005906	60.31	MAK
hsa-miR-198	NM_015156	73.6122	RCOR1
hsa-miR-198	NM_001171111	50.9707	FAM133A
hsa-miR-198	NM_001322830	50.6701	KCNMA1
hsa-miR-198	NM_001008222	57.0276	ZDHHC9
hsa-miR-198	NM_001164771	51.7316	SLC7A2
hsa-miR-198	NM_001322395	93.6364	ENTPD6
hsa-miR-198	NM_001178130	62.8685	EGF
hsa-miR-198	NM_003350	61.1745	UBE2V2
hsa-miR-198	NM_001134651	76.9795	EIF4E3
hsa-miR-198	NM_001033082	59.8549	MYCL
hsa-miR-198	NM_001146702	96.0132	KDM5C
hsa-miR-198	NM_001282917	60.6878	RALGAPB
hsa-miR-198	NM_139242	62.1082	MTFMT
hsa-miR-198	NM_001173462	51.9048	SHISA6
hsa-miR-198	NM_002969	82.1425	MAPK12
hsa-miR-198	NM_001321949	65.6895	FGF14
hsa-miR-198	NM_177403	69.0552	RAB7B
hsa-miR-198	NM_005219	63.3795	DIAPH1
hsa-miR-198	NM_001113178	52.18	NFAT5
hsa-miR-198	NM_001184896	58.2147	PHF8
hsa-miR-198	NM_001278355	60.2551	FRS2
hsa-miR-198	NM_001271769	74.3379	AP3B1
hsa-miR-198	NM_001009611	61.5301	PRAMEF4
hsa-miR-198	NM_021923	88.7835	FGFRL1
hsa-miR-198	NM_133487	86.0626	RAD51
hsa-miR-198	NM_001286568	50	ZRANB3
hsa-miR-198	NM_001319191	76.4967	PLAU
hsa-miR-198	NM_004037	62.2563	AMPD2
hsa-miR-198	NM_001323281	71.7918	RBL1
hsa-miR-198	NM_001286403	52.9681	CIITA
hsa-miR-198	NM_021229	65.6732	NTN4
hsa-miR-198	NM_201432	65.6056	GAS7
hsa-miR-198	NM_013296	69.6916	GPSM2
hsa-miR-198	NM_001322802	64.2023	NNAT
hsa-miR-198	NM_152311	79.56	CLRN3
hsa-miR-198	NM_001083924	62.1695	C1orf116
hsa-miR-198	NM_001270732	60.5078	BCL2L13
hsa-miR-198	NM_001324185	61.898	SH3GL3
hsa-miR-198	NM_001300813	76.5547	SEC24B
hsa-miR-198	NM_001318946	60.1033	VPS26A
hsa-miR-198	NM_001884	55.21	HAPLN1
hsa-miR-198	NM_001310134	60.0254	PRAMEF25
hsa-miR-198	NM_000075	60.2015	CDK4
hsa-miR-198	NM_018711	73.5958	SVOP
hsa-miR-198	NM_003483	65.4051	HMGA2
hsa-miR-198	NM_015834	84.7475	ADARB1
hsa-miR-198	NM_025107	73.7568	MYCT1
hsa-miR-198	NM_194441	50.7961	BTN3A1
hsa-miR-198	NM_001136258	62.1475	SGMS2
hsa-miR-198	NM_003165	58.5735	STXBP1
hsa-miR-198	NM_001015877	75.351	PHF6
hsa-miR-198	NM_145905	84.3408	HMGA1
hsa-miR-198	NM_001312654	57.9122	ENTPD1
hsa-miR-198	NM_001160258	88.08	CNR1
hsa-miR-218-1-3p	NM_001317207	70.3125	CXXC5
hsa-miR-218-1-3p	NM_001171020	90.4819	PWWP3B
hsa-miR-218-1-3p	NM_001278273	73.3248	SRPK2
hsa-miR-218-1-3p	NM_001128179	74.4284	NPHP1
hsa-miR-218-1-3p	NM_025073	56.9849	SIKE1
hsa-miR-218-1-3p	NM_001145339	53.9301	MDM2
hsa-miR-218-1-3p	NM_138420	84.5152	AHNAK2
hsa-miR-218-1-3p	NM_001321768	69.3969	ZNF471
hsa-miR-218-1-3p	NM_018976	85.6516	SLC38A2
hsa-miR-218-1-3p	NM_021032	58.0255	FGF12
hsa-miR-218-1-3p	NM_001032363	58.4212	MICOS10
hsa-miR-218-1-3p	NM_001195087	52.101	GGACT
hsa-miR-218-1-3p	NM_006200	50.7389	PCSK5
hsa-miR-218-1-3p	NM_001168363	51.3127	PCDH11X
hsa-miR-218-1-3p	NM_001199040	54.6064	STRA6
hsa-miR-218-1-3p	NM_001288656	70.0676	UBN1
hsa-miR-218-1-3p	NM_001293091	67.0014	CDC27
hsa-miR-218-1-3p	NM_001144008	62.2123	SLITRK2
hsa-miR-218-1-3p	NM_173851	55.8917	SLC30A8
hsa-miR-218-1-3p	NM_152439	70.902	BEST3
hsa-miR-218-1-3p	NM_175907	74.6995	PTGR3
hsa-miR-218-1-3p	NM_001002838	77.2946	WNK3
hsa-miR-218-1-3p	NM_007171	78.5866	POMT1
hsa-miR-218-1-3p	NM_001314063	83.2304	PFKFB3
hsa-miR-218-1-3p	NM_001142354	54.508	PPP3CB
hsa-miR-218-1-3p	NM_016441	85.6288	CRIM1
hsa-miR-218-1-3p	NM_001037160	78.859	CYS1
hsa-miR-218-1-3p	NM_014910	81.9036	ZNF507
hsa-miR-218-1-3p	NM_007375	50	TARDBP
hsa-miR-218-1-3p	NM_001172815	55.8917	SLC30A8
hsa-miR-218-1-3p	NM_014294	92.5808	TRAM1
hsa-miR-218-1-3p	NM_001204477	64.4764	CDRT4
hsa-miR-218-1-3p	NM_001202474	75.7818	PGR
hsa-miR-218-1-3p	NM_001195278	60.6915	TMEM178B
hsa-miR-218-1-3p	NM_001282630	52.7559	PFKFB3
hsa-miR-218-1-3p	NM_001243755	78.1878	CYREN
hsa-miR-218-1-3p	NM_001278727	78.6725	RFXANK
hsa-miR-218-1-3p	NM_001202517	60.5979	CFLAR
hsa-miR-218-1-3p	NM_005238	60.9488	ETS1
hsa-miR-218-1-3p	NM_001144766	73.2882	DNAJC7
hsa-miR-218-1-3p	NM_139323	52.5731	YWHAB
hsa-miR-218-1-3p	NM_152653	86.4722	UBE2E2
hsa-miR-218-1-3p	NM_001318058	53.5866	DMAC1
hsa-miR-218-1-3p	NM_001286840	63.7037	PHF19
hsa-miR-218-1-3p	NM_015483	75.4719	KBTBD2
hsa-miR-218-1-3p	NM_001162496	72.0367	C21orf62
hsa-miR-218-1-3p	NM_033106	91.1505	GALP
hsa-miR-218-1-3p	NM_001304504	73.3995	HMG20A
hsa-miR-218-1-3p	NM_001304473	54.3641	CHRD
hsa-miR-218-1-3p	NM_001271784	63.7114	FAR2
hsa-miR-218-1-3p	NM_000461	56.7054	THRB
hsa-miR-218-1-3p	NM_032814	53.2618	RNFT2
hsa-miR-218-1-3p	NM_004657	54.7044	CAVIN2
hsa-miR-218-1-3p	NM_001301648	77.5462	MFAP3L
hsa-miR-218-1-3p	NM_001244569	86.3162	BID
hsa-miR-218-1-3p	NM_001008493	65.9044	ENAH
hsa-miR-218-1-3p	NM_138348	57.3252	OTULIN
hsa-miR-218-1-3p	NM_001287439	78.9349	JADE1
hsa-miR-218-1-3p	NM_001317201	70.3125	CXXC5
hsa-miR-218-1-3p	NM_001030287	88.7034	ATF3
hsa-miR-218-1-3p	NM_015225	62.4261	PRUNE2
hsa-miR-218-1-3p	NM_003173	51.8639	SUV39H1
hsa-miR-218-1-3p	NM_001172411	51.0515	VANGL1
hsa-miR-218-1-3p	NM_199320	78.9349	JADE1
hsa-miR-218-1-3p	NM_001102398	58.2596	HNRNPR
hsa-miR-218-1-3p	NM_001178083	61.5998	EXT2
hsa-miR-218-1-3p	NM_000983	71.2537	RPL22
hsa-miR-218-1-3p	NM_021141	58.4018	XRCC5
hsa-miR-218-1-3p	NM_001039210	89.4275	ALG13
hsa-miR-218-1-3p	NM_000587	86.5727	C7
hsa-miR-218-1-3p	NM_057180	51.5545	VPS29
hsa-miR-218-1-3p	NM_001322838	81.9361	KCNMA1
hsa-miR-218-1-3p	NM_001178141	52.2888	TFDP2
hsa-miR-218-1-3p	NM_001029858	55.0678	SLC35F1
hsa-miR-218-1-3p	NM_001145798	69.4812	CACNB4
hsa-miR-218-1-3p	NM_181504	57.5726	PIK3R1
hsa-miR-218-1-3p	NM_015570	56.5328	AUTS2
hsa-miR-218-1-3p	NM_001290204	79.1838	DCP1A
hsa-miR-218-1-3p	NM_032436	57.5727	CHAMP1
hsa-miR-218-1-3p	NM_001306093	74.6995	PTGR3
hsa-miR-218-1-3p	NM_018638	62.4306	ETNK1
hsa-miR-218-1-3p	NM_006158	71.4624	NEFL
hsa-miR-218-1-3p	NM_001286238	87.0014	SPATA6
hsa-miR-218-1-3p	NM_001004317	58.7886	LIN28B
hsa-miR-218-1-3p	NM_001127257	61.4742	SLC39A10
hsa-miR-218-1-3p	NM_001317804	86.3516	TRAM1
hsa-miR-218-1-3p	NM_001320737	67.2038	FAM107B
hsa-miR-218-1-3p	NM_001103170	67.9895	AADACL3
hsa-miR-218-1-3p	NM_148976	65.0005	PSMA1
hsa-miR-218-1-3p	NM_001110213	85.4743	PRH2
hsa-miR-218-1-3p	NM_001033677	50	CABP1
hsa-miR-218-1-3p	NM_020344	86.2665	SLC24A2
hsa-miR-218-1-3p	NM_006108	79.0731	SPON1
hsa-miR-218-1-3p	NM_001304472	54.3641	CHRD
hsa-miR-218-1-3p	NM_001164343	63.2835	ZBTB20
hsa-miR-218-1-3p	NM_001001669	68.6837	ARHGEF37
hsa-miR-218-1-3p	NM_024541	50.8364	ARMH3
hsa-miR-218-1-3p	NM_001040453	91.2467	MINDY2
hsa-miR-218-1-3p	NM_001009555	64.9033	SH3D19
hsa-miR-218-1-3p	NM_001128923	64.9033	SH3D19
hsa-miR-218-1-3p	NM_001308049	62.4261	PRUNE2
hsa-miR-218-1-3p	NM_000107	51.8756	DDB2
hsa-miR-218-1-3p	NM_001282696	67.2038	FAM107B
hsa-miR-218-1-3p	NM_001003674	65.8046	LDLRAD4
hsa-miR-218-1-3p	NM_001322127	60.8502	PUS10
hsa-miR-218-1-3p	NM_001191014	80.3724	GSTO2
hsa-miR-218-1-3p	NM_001277962	86.2713	STIM1
hsa-miR-218-1-3p	NM_025015	68.8643	HSPA12A
hsa-miR-218-1-3p	NM_016226	51.5545	VPS29
hsa-miR-218-1-3p	NM_031267	55.4148	CDK13
hsa-miR-218-1-3p	NM_001318944	74.9443	VPS26A
hsa-miR-218-1-3p	NM_001278728	78.6725	RFXANK
hsa-miR-218-1-3p	NM_001990	60.1171	EYA3
hsa-miR-218-1-3p	NM_172102	82.3361	CD8B
hsa-miR-218-1-3p	NM_024033	78.1878	CYREN
hsa-miR-218-1-3p	NM_004896	74.9443	VPS26A
hsa-miR-218-1-3p	NM_024513	51.5648	FYCO1
hsa-miR-218-1-3p	NM_001034841	65.2413	ITPRIPL2
hsa-miR-218-1-3p	NM_001205262	56.0874	RAD54B
hsa-miR-218-1-3p	NM_001317211	70.3125	CXXC5
hsa-miR-218-1-3p	NM_001317206	70.3125	CXXC5
hsa-miR-218-1-3p	NM_022081	78.9026	HPS4
hsa-miR-218-1-3p	NM_001145158	76.5867	HBS1L
hsa-miR-218-1-3p	NM_001198615	58.5998	MAP7
hsa-miR-218-1-3p	NM_001172766	60.5821	FOXP2
hsa-miR-218-1-3p	NM_001307936	85.6516	SLC38A2
hsa-miR-218-1-3p	NM_001128178	74.4284	NPHP1
hsa-miR-218-1-3p	NM_016234	54.1139	ACSL5
hsa-miR-218-1-3p	NM_001796	89.5528	CDH8
hsa-miR-218-1-3p	NM_001136268	51.7748	DAZAP2
hsa-miR-218-1-3p	NM_183239	80.3724	GSTO2
hsa-miR-218-1-3p	NM_001012514	83.2008	ITM2C
hsa-miR-218-1-3p	NM_001322367	85.4956	HK1
hsa-miR-218-1-3p	NM_001242575	61.8563	NA
hsa-miR-218-1-3p	NM_033497	85.4956	HK1
hsa-miR-218-1-3p	NM_001196	86.3162	BID
hsa-miR-218-1-3p	NM_005094	74.3236	SLC27A4
hsa-miR-218-1-3p	NM_001202518	60.0681	CFLAR
hsa-miR-218-1-3p	NM_001302807	67.7595	OPRPN
hsa-miR-218-1-3p	NM_001014797	81.9361	KCNMA1
hsa-miR-218-1-3p	NM_001162495	72.0367	C21orf62
hsa-miR-218-1-3p	NM_001290354	55.9872	DHFR
hsa-miR-218-1-3p	NM_001114091	67.0014	CDC27
hsa-miR-218-1-3p	NM_015642	63.2835	ZBTB20
hsa-miR-218-1-3p	NM_001281767	70.0069	EPHA5
hsa-miR-218-1-3p	NM_001287241	63.3516	ITM2C
hsa-miR-218-1-3p	NM_152423	63.6557	PWWP3B
hsa-miR-218-1-3p	NM_001178139	52.2888	TFDP2
hsa-miR-218-1-3p	NM_001243754	78.1878	CYREN
hsa-miR-218-1-3p	NM_001127482	81.0564	SPRYD7
hsa-miR-218-1-3p	NM_002392	53.9301	MDM2
hsa-miR-218-1-3p	NM_001318849	66.887	DOCK9
hsa-miR-218-1-3p	NM_001136156	81.9036	ZNF507
hsa-miR-218-1-3p	NM_001267047	51.7715	FRMD6
hsa-miR-218-1-3p	NM_006814	56.9583	PSMF1
hsa-miR-218-1-3p	NM_153331	85.9149	KCTD6
hsa-miR-218-1-3p	NM_003156	56.9428	STIM1
hsa-miR-218-1-3p	NM_000097	74.701	CPOX
hsa-miR-218-1-3p	NM_152433	85.2139	KBTBD3
hsa-miR-218-1-3p	NM_021202	93.215	TP53INP2
hsa-miR-218-1-3p	NM_001144663	52.9764	CDH17
hsa-miR-218-1-3p	NM_001282700	67.2038	FAM107B
hsa-miR-218-1-3p	NM_001040697	55.7004	UEVLD
hsa-miR-218-1-3p	NM_001085372	58.6936	UQCC3
hsa-miR-218-1-3p	NM_001286239	87.0014	SPATA6
hsa-miR-218-1-3p	NM_001145414	65.7521	CHM
hsa-miR-218-1-3p	NM_004863	67.6009	SPTLC2
hsa-miR-218-1-3p	NM_006135	68.9403	CAPZA1
hsa-miR-218-1-3p	NM_001197129	64.4169	SYS1
hsa-miR-218-1-3p	NM_153377	61.7464	LRIG3
hsa-miR-218-1-3p	NM_004787	67.3294	SLIT2
hsa-miR-218-1-3p	NM_198859	63.2745	PRICKLE2
hsa-miR-218-1-3p	NM_138492	55.414	PRELID2
hsa-miR-218-1-3p	NM_006187	54.5821	OAS3
hsa-miR-218-1-3p	NM_197967	86.3162	BID
hsa-miR-218-1-3p	NM_001102399	58.2596	HNRNPR
hsa-miR-218-1-3p	NM_001256461	51.9343	SLC12A2
hsa-miR-218-1-3p	NM_001191015	80.3724	GSTO2
hsa-miR-218-1-3p	NM_201599	72.2661	ZMYM3
hsa-miR-218-1-3p	NM_001287055	83.663	ZKSCAN1
hsa-miR-218-1-3p	NM_001301647	77.5462	MFAP3L
hsa-miR-218-1-3p	NM_001322356	84.9283	LMAN2L
hsa-miR-218-1-3p	NM_032539	62.2123	SLITRK2
hsa-miR-218-1-3p	NM_001317200	70.3125	CXXC5
hsa-miR-218-1-3p	NM_001204478	63.4963	TVP23C-CDRT4
hsa-miR-218-1-3p	NM_033542	64.4169	SYS1
hsa-miR-218-1-3p	NM_000926	75.7818	PGR
hsa-miR-218-1-3p	NM_005523	92.4268	HOXA11
hsa-miR-218-1-3p	NM_022894	56.2446	PAPOLG
hsa-miR-218-1-3p	NM_001164344	63.2835	ZBTB20
hsa-miR-218-1-3p	NM_001288973	62.3765	ADAM12
hsa-miR-218-1-3p	NM_001198614	58.5998	MAP7
hsa-miR-218-1-3p	NM_001254727	55.955	AP4S1
hsa-miR-218-1-3p	NM_174882	52.0455	CRB3
hsa-miR-218-1-3p	NM_001077365	78.5866	POMT1
hsa-miR-218-1-3p	NM_001009554	87.3069	MFAP3L
hsa-miR-218-1-3p	NM_152309	55.6954	PIK3AP1
hsa-miR-218-1-3p	NM_006488	93.9744	KHK
hsa-miR-218-1-3p	NM_006235	69.9313	POU2AF1
hsa-miR-218-1-3p	NM_001015056	51.7127	RTKN
hsa-miR-218-1-3p	NM_032975	56.9075	DTNA
hsa-miR-218-1-3p	NM_001035260	74.8345	VPS26A
hsa-miR-218-1-3p	NM_022831	75.9157	AIDA
hsa-miR-218-1-3p	NM_001257239	89.486	ALG13
hsa-miR-218-1-3p	NM_001317784	65.3837	SCYL2
hsa-miR-218-1-3p	NM_003749	86.5719	IRS2
hsa-miR-218-1-3p	NM_024577	52.3344	SH3TC2
hsa-miR-218-1-3p	NM_020717	62.5844	SHROOM4
hsa-miR-218-1-3p	NM_014623	53.2231	MEA1
hsa-miR-218-1-3p	NM_001242318	74.7036	PDE7A
hsa-miR-218-1-3p	NM_001202515	60.5979	CFLAR
hsa-miR-218-1-3p	NM_001320738	67.2038	FAM107B
hsa-miR-218-1-3p	NM_001322402	57.9232	ADGRL3
hsa-miR-218-1-3p	NM_001270679	78.6206	MCU
hsa-miR-218-1-3p	NM_005417	87.5282	SRC
hsa-miR-218-1-3p	NM_016823	53.9894	CRK
hsa-miR-218-1-3p	NM_054027	98.6293	ANKH
hsa-miR-218-1-3p	NM_018314	93.6297	UEVLD
hsa-miR-218-1-3p	NM_001308051	62.4261	PRUNE2
hsa-miR-218-1-3p	NM_001276249	65.8046	LDLRAD4
hsa-miR-218-1-3p	NM_001109903	50	RNFT2
hsa-miR-218-1-3p	NM_001247996	52.2153	ASAP1
hsa-miR-218-1-3p	NM_001317210	70.3125	CXXC5
hsa-miR-218-1-3p	NM_001323409	56.6907	PSMF1
hsa-miR-218-1-3p	NM_001077180	82.87	METTL9
hsa-miR-218-1-3p	NM_014365	89.6971	HSPB8
hsa-miR-218-1-3p	NM_001146276	64.0051	NCEH1
hsa-miR-218-1-3p	NM_001040143	76.1544	SCN2A
hsa-miR-218-1-3p	NM_001322835	81.9361	KCNMA1
hsa-miR-218-1-3p	NM_001320780	82.0432	ZNF544
hsa-miR-218-1-3p	NM_003358	70.1426	UGCG
hsa-miR-218-1-3p	NM_001288659	82.87	METTL9
hsa-miR-218-1-3p	NM_153254	55.0847	TTLL10
hsa-miR-218-1-3p	NM_012108	66.537	STAP1
hsa-miR-218-1-3p	NM_001202519	60.0681	CFLAR
hsa-miR-218-1-3p	NM_000791	55.9872	DHFR
hsa-miR-218-1-3p	NM_001318943	53.2231	MEA1
hsa-miR-218-1-3p	NM_001164145	57.5727	CHAMP1
hsa-miR-218-1-3p	NM_014790	50	JAKMIP2
hsa-miR-218-1-3p	NM_016025	82.87	METTL9
hsa-miR-218-1-3p	NM_006699	74.3671	MAN1A2
hsa-miR-218-1-3p	NM_001282561	60.1171	EYA3
hsa-miR-218-1-3p	NM_001244816	83.5864	FOXP1
hsa-miR-218-1-3p	NM_001099691	58.4776	TGFA
hsa-miR-218-1-3p	NM_001177549	80.2863	SIGLEC6
hsa-miR-218-1-3p	NM_018099	63.7114	FAR2
hsa-miR-218-1-3p	NM_001198943	56.9075	DTNA
hsa-miR-218-1-3p	NM_006540	51.8917	NCOA2
hsa-miR-218-1-3p	NM_025236	64.2881	RNF39
hsa-miR-218-1-3p	NM_001134771	82.7265	SLC12A5
hsa-miR-218-1-3p	NM_001290205	79.1838	DCP1A
hsa-miR-218-1-3p	NM_003718	81.6162	CDK13
hsa-miR-218-1-3p	NM_013390	54.6904	CEMIP2
hsa-miR-218-1-3p	NM_020899	58.1747	ZBTB4
hsa-miR-218-1-3p	NM_005826	58.2596	HNRNPR
hsa-miR-218-1-3p	NM_033498	85.4956	HK1
hsa-miR-218-1-3p	NM_001144010	62.2123	SLITRK2
hsa-miR-218-1-3p	NM_001322829	81.9361	KCNMA1
hsa-miR-218-1-3p	NM_001145265	57.2748	SLC35C1
hsa-miR-218-1-3p	NM_182691	73.3248	SRPK2
hsa-miR-218-1-3p	NM_001080495	80.282	TNRC18
hsa-miR-218-1-3p	NM_000635	69.69	RFX2
hsa-miR-218-1-3p	NM_001962	56.1913	EFNA5
hsa-miR-218-1-3p	NM_025244	89.6094	TSGA10
hsa-miR-218-1-3p	NM_183043	59.9901	RNF6
hsa-miR-218-1-3p	NM_005076	63.5546	CNTN2
hsa-miR-218-1-3p	NM_001321703	51.8917	NCOA2
hsa-miR-218-1-3p	NM_032968	51.3127	PCDH11X
hsa-miR-218-1-3p	NM_138959	51.0515	VANGL1
hsa-miR-218-1-3p	NM_001320735	67.2038	FAM107B
hsa-miR-218-1-3p	NM_001164347	63.2835	ZBTB20
hsa-miR-218-1-3p	NM_001001874	78.496	TPD52L3
hsa-miR-218-1-3p	NM_001100389	61.4055	TMEM192
hsa-miR-218-1-3p	NM_003741	54.3641	CHRD
hsa-miR-218-1-3p	NM_001144003	62.2123	SLITRK2
hsa-miR-218-1-3p	NM_001282562	60.1171	EYA3
hsa-miR-218-1-3p	NM_001243349	64.9033	SH3D19
hsa-miR-218-1-3p	NM_001321380	70.3273	PIK3C2A
hsa-miR-218-1-3p	NM_006620	76.5867	HBS1L
hsa-miR-218-1-3p	NM_019596	72.0367	C21orf62
hsa-miR-218-1-3p	NM_006831	74.7907	CLP1
hsa-miR-218-1-3p	NM_015344	56.4502	LEPROTL1
hsa-miR-218-1-3p	NM_001323017	52.7559	PFKFB3
hsa-miR-218-1-3p	NM_139070	70.7214	MAPK9
hsa-miR-218-1-3p	NM_001292008	51.3569	SSR1
hsa-miR-218-1-3p	NM_133372	86.6863	FNIP1
hsa-miR-218-1-3p	NM_001001928	50	PPARA
hsa-miR-218-1-3p	NM_001077366	78.5866	POMT1
hsa-miR-218-1-3p	NM_001271162	75.7818	PGR
hsa-miR-218-1-3p	NM_001303228	54.4207	TMEM156
hsa-miR-218-1-3p	NM_001199041	54.6064	STRA6
hsa-miR-218-1-3p	NM_182692	73.3248	SRPK2
hsa-miR-218-1-3p	NM_145738	54.3499	SYNGR1
hsa-miR-218-1-3p	NM_130808	63.6225	CPNE4
hsa-miR-218-1-3p	NM_052840	55.3854	CELF6
hsa-miR-218-1-3p	NM_001261386	93.5815	UEVLD
hsa-miR-218-1-3p	NM_001256316	55.2941	CHST9
hsa-miR-218-1-3p	NM_000272	74.4284	NPHP1
hsa-miR-218-1-3p	NM_006286	52.2888	TFDP2
hsa-miR-218-1-3p	NM_001308142	93.8401	MRTFB
hsa-miR-218-1-3p	NM_001244567	86.3162	BID
hsa-miR-218-1-3p	NM_007207	77.6906	DUSP10
hsa-miR-218-1-3p	NM_002677	64.4422	PMP2
hsa-miR-218-1-3p	NM_001320729	54.8692	ZBTB21
hsa-miR-218-1-3p	NM_001322355	84.9283	LMAN2L
hsa-miR-218-1-3p	NM_001308158	58.4776	TGFA
hsa-miR-218-1-3p	NM_139069	66.815	MAPK9
hsa-miR-218-1-3p	NM_001287443	78.9349	JADE1
hsa-miR-218-1-3p	NM_001282166	51.8639	SUV39H1
hsa-miR-218-1-3p	NM_006793	54.3161	PRDX3
hsa-miR-218-1-3p	NM_001198617	58.5998	MAP7
hsa-miR-218-1-3p	NM_001287440	78.9349	JADE1
hsa-miR-218-1-3p	NM_197966	86.3162	BID
hsa-miR-218-1-3p	NM_001270934	73.0817	JAKMIP2
hsa-miR-218-1-3p	NM_030641	91.4242	APOL6
hsa-miR-218-1-3p	NM_001198786	81.5738	POU2F1
hsa-miR-218-1-3p	NM_033428	53.5866	DMAC1
hsa-miR-218-1-3p	NM_152490	57.2564	B3GALNT2
hsa-miR-218-1-3p	NM_014932	81.9468	NLGN1
hsa-miR-218-1-3p	NM_001097612	54.6999	GPR89A
hsa-miR-218-1-3p	NM_001242815	56.2285	NA
hsa-miR-218-1-3p	NM_001198609	58.5998	MAP7
hsa-miR-218-1-3p	NM_001040450	82.2477	MINDY2
hsa-miR-218-1-3p	NM_001282151	51.1935	VPS29
hsa-miR-218-1-3p	NM_001297621	58.2596	HNRNPR
hsa-miR-218-1-3p	NM_001308050	62.4261	PRUNE2
hsa-miR-218-1-3p	NM_001278462	53.9301	MDM2
hsa-miR-218-1-3p	NM_000506	60.4078	F2
hsa-miR-218-1-3p	NM_001014975	70.6312	CFH
hsa-miR-218-1-3p	NM_001282282	50	JAKMIP2
hsa-miR-218-1-3p	NM_020828	54.5727	ZFP28
hsa-miR-218-1-3p	NM_015365	70.888	AMMECR1
hsa-miR-218-1-3p	NM_015627	81.3585	LDLRAP1
hsa-miR-218-1-3p	NM_152519	52.0696	KANSL1L
hsa-miR-218-1-3p	NM_001256141	56.6126	FSBP
hsa-miR-218-1-3p	NM_001303128	79.5618	DNAJC5G
hsa-miR-218-1-3p	NM_001317915	81.7763	RAB3C
hsa-miR-218-1-3p	NM_001136267	51.7748	DAZAP2
hsa-miR-218-1-3p	NM_001040142	76.1544	SCN2A
hsa-miR-218-1-3p	NM_013254	84.8362	TBK1
hsa-miR-218-1-3p	NM_001146277	64.0051	NCEH1
hsa-miR-218-1-3p	NM_001277313	51.8943	FMN1
hsa-miR-218-1-3p	NM_001322033	50.7599	ACTN4
hsa-miR-218-1-3p	NM_032682	83.5864	FOXP1
hsa-miR-218-1-3p	NM_012384	55.7879	GMEB2
hsa-miR-218-1-3p	NM_001144009	62.2123	SLITRK2
hsa-miR-218-1-3p	NM_001272000	81.422	DOCK7
hsa-miR-218-1-3p	NM_031845	66.1563	MAP2
hsa-miR-218-1-3p	NM_031453	67.2038	FAM107B
hsa-miR-218-1-3p	NM_001304505	73.3995	HMG20A
hsa-miR-218-1-3p	NM_004537	73.0956	NAP1L1
hsa-miR-218-1-3p	NM_001198944	56.9075	DTNA
hsa-miR-218-1-3p	NM_001282547	56.9667	STK40
hsa-miR-218-1-3p	NM_152315	72.0317	NXPE1
hsa-miR-218-1-3p	NM_001317208	70.3125	CXXC5
hsa-miR-218-1-3p	NM_015695	79.9705	BRPF3
hsa-miR-218-1-3p	NM_001320739	67.2038	FAM107B
hsa-miR-218-1-3p	NM_144709	60.8502	PUS10
hsa-miR-218-1-3p	NM_001290206	79.1838	DCP1A
hsa-miR-218-1-3p	NM_001012516	63.3516	ITM2C
hsa-miR-218-1-3p	NM_004569	59.0113	PIGH
hsa-miR-218-1-3p	NM_018403	79.1838	DCP1A
hsa-miR-218-1-3p	NM_001318942	53.2231	MEA1
hsa-miR-218-1-3p	NM_203380	54.1139	ACSL5
hsa-miR-218-1-3p	NM_001287050	85.4825	SAXO1
hsa-miR-218-1-3p	NM_016073	56.0047	HDGFL3
hsa-miR-218-1-3p	NM_134440	78.6725	RFXANK
hsa-miR-218-1-3p	NM_001136114	78.5866	POMT1
hsa-miR-218-1-3p	NM_139161	52.0455	CRB3
hsa-miR-218-1-3p	NM_001308159	58.4776	TGFA
hsa-miR-218-1-3p	NM_001244810	83.5864	FOXP1
hsa-miR-218-1-3p	NM_001317209	70.3125	CXXC5
hsa-miR-218-1-3p	NM_006867	62.4367	RBPMS
hsa-miR-218-1-3p	NM_001277961	56.9428	STIM1
hsa-miR-218-1-3p	NM_001058	73.7487	TACR1
hsa-miR-218-1-3p	NM_002752	70.7214	MAPK9
hsa-miR-218-1-3p	NM_001198616	58.5998	MAP7
hsa-miR-218-1-3p	NM_001289112	63.6225	CPNE4
hsa-miR-218-1-3p	NM_001172685	55.3854	CELF6
hsa-miR-218-1-3p	NM_001276251	65.8046	LDLRAD4
hsa-miR-218-1-3p	NM_017671	75.818	FERMT1
hsa-miR-218-1-3p	NM_178578	56.9583	PSMF1
hsa-miR-218-1-3p	NM_004975	51.0763	KCNB1
hsa-miR-218-1-3p	NM_002298	85.7856	LCP1
hsa-miR-218-1-3p	NM_001320736	67.2038	FAM107B
hsa-miR-218-1-3p	NM_001317805	86.3516	TRAM1
hsa-miR-218-1-3p	NM_032980	86.6638	DTNA
hsa-miR-218-1-3p	NM_001144830	59.3581	FMO5
hsa-miR-218-1-3p	NM_152740	87.5813	HIBADH
hsa-miR-218-1-3p	NM_001164342	71.3113	ZBTB20
hsa-miR-218-1-3p	NM_133170	52.6234	PTPRT
hsa-miR-218-1-3p	NM_001128924	64.9033	SH3D19
hsa-miR-218-1-3p	NM_001282695	67.2038	FAM107B
hsa-miR-218-1-3p	NM_001164552	68.5806	NA
hsa-miR-218-1-3p	NM_016463	70.3125	CXXC5
hsa-miR-218-1-3p	NM_080872	52.8176	UNC5D
hsa-miR-218-1-3p	NM_014692	85.2953	SEC14L5
hsa-miR-218-1-3p	NM_173650	79.5091	DNAJC5G
hsa-miR-218-1-3p	NM_001128930	68.4756	ENTPD4
hsa-miR-218-1-3p	NM_207122	61.5998	EXT2
hsa-miR-218-1-3p	NM_001168362	51.3127	PCDH11X
hsa-miR-218-1-3p	NM_139068	78.8184	MAPK9
hsa-miR-218-1-3p	NM_003980	58.5998	MAP7
hsa-miR-218-1-3p	NM_001037172	58.2204	PXYLP1
hsa-miR-218-1-3p	NM_144571	88.7859	CNOT6L
hsa-miR-218-1-3p	NM_001322354	84.9283	LMAN2L
hsa-miR-218-1-3p	NM_032812	60.5652	PLXDC2
hsa-miR-218-1-3p	NM_198833	51.0835	SERPINB8
hsa-miR-218-1-3p	NM_001005747	69.4812	CACNB4
hsa-miR-218-1-3p	NM_001265612	57.0304	CNOT1
hsa-miR-218-1-3p	NM_001287442	78.9349	JADE1
hsa-miR-218-1-3p	NM_016284	57.0304	CNOT1
hsa-miR-218-1-3p	NM_001261385	93.6297	UEVLD
hsa-miR-218-1-3p	NM_020813	69.3969	ZNF471
hsa-miR-218-1-3p	NM_001199042	54.6064	STRA6
hsa-miR-218-1-3p	NM_004871	64.936	GOSR1
hsa-miR-218-1-3p	NM_001136051	61.7464	LRIG3
hsa-miR-218-1-3p	NM_030783	50.435	PTDSS2
hsa-miR-218-1-3p	NM_001318945	74.9443	VPS26A
hsa-miR-218-1-3p	NM_001191013	80.3724	GSTO2
hsa-miR-218-1-3p	NM_153456	57.6093	HS6ST3
hsa-miR-218-1-3p	NM_005206	53.103	CRK
hsa-miR-218-1-3p	NM_024408	81.1361	NOTCH2
hsa-miR-218-1-3p	NM_001242956	64.2289	SEPTIN7
hsa-miR-218-1-3p	NM_001286790	88.7859	CNOT6L
hsa-miR-218-1-3p	NM_001046	80.3668	SLC12A2
hsa-miR-218-1-3p	NM_003721	78.6725	RFXANK
hsa-miR-218-1-3p	NM_001282699	67.2038	FAM107B
hsa-miR-218-1-3p	NM_001098402	54.8692	ZBTB21
hsa-miR-218-1-3p	NM_001042481	79.6758	FRMD6
hsa-miR-218-1-3p	NM_203373	75.0105	FBXL22
hsa-miR-218-1-3p	NM_001271999	81.422	DOCK7
hsa-miR-218-1-3p	NM_001297622	58.2596	HNRNPR
hsa-miR-218-1-3p	NM_138453	81.7763	RAB3C
hsa-miR-218-1-3p	NM_001145515	51.9478	SCRN1
hsa-miR-218-1-3p	NM_005096	72.2661	ZMYM3
hsa-miR-218-1-3p	NM_001322123	60.8502	PUS10
hsa-miR-218-1-3p	NM_015082	52.899	FSTL4
hsa-miR-218-1-3p	NM_004566	52.7559	PFKFB3
hsa-miR-218-1-3p	NM_001198938	51.1687	DTNA
hsa-miR-218-1-3p	NM_057175	59.7273	NAA15
hsa-miR-218-1-3p	NM_015285	64.1789	WDR7
hsa-miR-218-1-3p	NM_033500	85.4956	HK1
hsa-miR-218-1-3p	NM_175610	56.4023	TJP1
hsa-miR-218-1-3p	NM_001674	88.7034	ATF3
hsa-miR-218-1-3p	NM_002483	61.3375	CEACAM6
hsa-miR-218-1-3p	NM_001285440	70.2373	RICTOR
hsa-miR-218-1-3p	NM_018466	89.486	ALG13
hsa-miR-218-1-3p	NM_006915	55.2794	RP2
hsa-miR-218-1-3p	NM_001320776	81.9826	ZNF544
hsa-miR-218-1-3p	NM_014764	51.7748	DAZAP2
hsa-miR-218-1-3p	NM_001142443	57.1996	EDC3
hsa-miR-218-1-3p	NM_001146278	64.0051	NCEH1
hsa-miR-218-1-3p	NM_001198942	56.9075	DTNA
hsa-miR-218-1-3p	NM_001199295	74.4456	ZNF549
hsa-miR-218-1-3p	NM_001164345	63.2835	ZBTB20
hsa-miR-218-1-3p	NM_001198619	58.5998	MAP7
hsa-miR-218-1-3p	NM_001243753	76.8108	CYREN
hsa-miR-218-1-3p	NM_001127380	58.8656	SAA2
hsa-miR-218-1-3p	NM_001033723	80.6871	ZNF704
hsa-miR-218-1-3p	NM_020922	77.2946	WNK3
hsa-miR-218-1-3p	NM_001281736	59.9381	ENOX2
hsa-miR-218-1-3p	NM_004852	55.1351	ONECUT2
hsa-miR-218-1-3p	NM_021647	77.5462	MFAP3L
hsa-miR-218-1-3p	NM_001282405	90.9873	NRBF2
hsa-miR-218-1-3p	NM_001144004	62.2123	SLITRK2
hsa-miR-218-1-3p	NM_001303127	79.5091	DNAJC5G
hsa-miR-218-1-3p	NM_001321711	51.8917	NCOA2
hsa-miR-218-1-3p	NM_001272001	81.422	DOCK7
hsa-miR-218-1-3p	NM_001178142	52.2888	TFDP2
hsa-miR-218-1-3p	NM_001323016	52.6773	PFKFB3
hsa-miR-218-1-3p	NM_001162383	62.1573	ARHGEF2
hsa-miR-218-1-3p	NM_001040619	88.0482	ATF3
hsa-miR-218-1-3p	NM_001320740	67.2038	FAM107B
hsa-miR-218-1-3p	NM_001243749	76.8108	CYREN
hsa-miR-218-1-3p	NM_001162384	62.1573	ARHGEF2
hsa-miR-218-1-3p	NM_001289135	67.3294	SLIT2
hsa-miR-218-1-3p	NM_031847	66.1563	MAP2
hsa-miR-218-1-3p	NM_001015051	54.8864	RUNX2
hsa-miR-218-1-3p	NM_001282697	67.2038	FAM107B
hsa-miR-218-1-3p	NM_001286262	51.4484	TCP11L2
hsa-miR-218-1-3p	NM_207181	74.4284	NPHP1
hsa-miR-218-1-3p	NM_012164	50.989	FBXW2
hsa-miR-218-1-3p	NM_001198939	56.9075	DTNA
hsa-miR-218-1-3p	NM_001142619	54.6064	STRA6
hsa-miR-218-1-3p	NM_033110	52.101	GGACT
hsa-miR-218-1-3p	NM_020727	54.8692	ZBTB21
hsa-miR-218-1-3p	NM_001317203	70.3125	CXXC5
hsa-miR-218-1-3p	NM_002786	65.0005	PSMA1
hsa-miR-218-1-3p	NM_021242	80.6013	MID1IP1
hsa-miR-218-1-3p	NM_001289136	67.3294	SLIT2
hsa-miR-218-1-3p	NM_002314	83.899	LIMK1
hsa-miR-218-1-3p	NM_001695	74.4629	ATP6V1C1
hsa-miR-218-1-3p	NM_003236	58.4776	TGFA
hsa-miR-218-1-3p	NM_021225	73.9303	OPRPN
hsa-miR-218-1-3p	NM_017851	80.7844	PARP16
hsa-miR-218-1-3p	NM_015378	63.4998	VPS13D
hsa-miR-218-1-3p	NM_001007022	93.8278	ODF2L
hsa-miR-218-1-3p	NM_001008738	92.373	FNIP1
hsa-miR-218-1-3p	NM_001323955	91.1022	DYNC1LI2
hsa-miR-218-1-3p	NM_001282702	67.2038	FAM107B
hsa-miR-218-1-3p	NM_001261384	55.7004	UEVLD
hsa-miR-218-1-3p	NM_001024630	54.8864	RUNX2
hsa-miR-218-1-3p	NM_001301025	56.4023	TJP1
hsa-miR-218-1-3p	NM_006141	78.8688	DYNC1LI2
hsa-miR-218-1-3p	NM_032017	56.9667	STK40
hsa-miR-218-1-3p	NM_001204083	58.3451	MICOS10
hsa-miR-218-1-3p	NM_003205	50.9972	TCF12
hsa-miR-218-1-3p	NM_018847	56.7665	KLHL9
hsa-miR-218-1-3p	NM_002577	65.8439	PAK2
hsa-miR-218-1-3p	NM_001271518	81.9361	KCNMA1
hsa-miR-218-1-3p	NM_001321712	51.8917	NCOA2
hsa-miR-218-1-3p	NM_001311257	60.4078	NA
hsa-miR-218-1-3p	NM_006312	85.4731	NCOR2
hsa-miR-218-1-3p	NM_030649	50.8119	ACAP3
hsa-miR-218-1-3p	NM_014766	51.9478	SCRN1
hsa-miR-218-1-3p	NM_003920	60.8542	TIMELESS
hsa-miR-218-1-3p	NM_000726	69.4812	CACNB4
hsa-miR-218-1-3p	NM_006635	68.9413	ZNF460
hsa-miR-218-1-3p	NM_001267046	51.7715	FRMD6
hsa-miR-218-1-3p	NM_181874	77.7857	GRM7
hsa-miR-218-1-3p	NM_001142292	84.9283	LMAN2L
hsa-miR-218-1-3p	NM_033046	51.7127	RTKN
hsa-miR-218-1-3p	NM_001322352	84.9283	LMAN2L
hsa-miR-218-1-3p	NM_003348	61.8112	UBE2N
hsa-miR-218-1-3p	NM_001040113	89.8603	MYH11
hsa-miR-218-1-3p	NM_001282703	67.2038	FAM107B
hsa-miR-218-1-3p	NM_001135820	54.6904	CEMIP2
hsa-miR-218-1-3p	NM_000188	85.4956	HK1
hsa-miR-218-1-3p	NM_021007	76.1544	SCN2A
hsa-miR-218-1-3p	NM_001317199	89.7194	CXXC5
hsa-miR-218-1-3p	NM_001286157	78.8688	DYNC1LI2
hsa-miR-218-1-3p	NM_001243752	76.8108	CYREN
hsa-miR-218-1-3p	NM_207362	55.8254	CRACDL
hsa-miR-218-1-3p	NM_001300960	55.7506	CDK19
hsa-miR-218-1-3p	NM_001282698	67.2038	FAM107B
hsa-miR-218-1-3p	NM_001287437	92.2288	JADE1
hsa-miR-218-1-3p	NM_001271161	75.7818	PGR
hsa-miR-218-1-3p	NM_001098791	80.6013	MID1IP1
hsa-miR-218-1-3p	NM_001008711	62.7986	RBPMS
hsa-miR-218-1-3p	NM_001244815	83.5864	FOXP1
hsa-miR-218-1-3p	NM_203379	54.1139	ACSL5
hsa-miR-218-1-3p	NM_001098403	54.8692	ZBTB21
hsa-miR-218-1-3p	NM_002697	81.5738	POU2F1
hsa-miR-218-1-3p	NM_001257235	89.486	ALG13
hsa-miR-218-1-3p	NM_000844	79.7675	GRM7
hsa-miR-218-1-3p	NM_001461	61.8133	FMO5
hsa-miR-218-1-3p	NM_001244570	86.3162	BID
hsa-miR-218-1-3p	NM_001002914	59.983	KCTD11
hsa-miR-218-1-3p	NM_001164346	63.2835	ZBTB20
hsa-miR-218-1-3p	NM_001198618	58.5998	MAP7
hsa-miR-218-1-3p	NM_014666	83.1569	CLINT1
hsa-miR-218-1-3p	NM_004723	62.1573	ARHGEF2
hsa-miR-218-1-3p	NM_001320783	81.9826	ZNF544
hsa-miR-218-1-3p	NM_003074	85.9537	SMARCC1
hsa-miR-218-1-3p	NM_001204082	58.4212	MICOS10
hsa-miR-218-1-3p	NM_001144005	62.2123	SLITRK2
hsa-miR-218-1-3p	NM_001300845	70.8627	SLC35F3
hsa-miR-218-1-3p	NM_001286724	73.9677	FAM120A
hsa-miR-218-1-3p	NM_001301035	56.5476	ERF
hsa-miR-218-1-3p	NM_001290357	55.8649	DHFR
hsa-miR-218-1-3p	NM_001198611	58.5998	MAP7
hsa-miR-218-1-3p	NM_001039538	66.1563	MAP2
hsa-miR-218-1-3p	NM_001319676	55.3017	CAPN9
hsa-miR-218-1-3p	NM_170769	64.2881	RNF39
hsa-miR-218-1-3p	NM_001144006	62.2123	SLITRK2
hsa-miR-218-1-3p	NM_015569	52.43	DNM3
hsa-miR-218-1-3p	NM_001322124	60.8502	PUS10
hsa-miR-218-1-3p	NM_001206484	88.7034	ATF3
hsa-miR-218-1-3p	NM_006615	55.3017	CAPN9
hsa-miR-218-1-3p	NM_152756	70.2373	RICTOR
hsa-miR-218-1-3p	NM_001320731	54.8692	ZBTB21
hsa-miR-218-1-3p	NM_002640	51.0835	SERPINB8
hsa-miR-218-1-3p	NM_006908	81.6318	RAC1
hsa-miR-218-1-3p	NM_181787	76.8351	DPY19L4
hsa-miR-218-1-3p	NM_001001890	59.5629	RUNX1
hsa-miR-218-1-3p	NM_198439	85.2139	KBTBD3
hsa-miR-218-1-3p	NM_001256105	64.6209	WNT5A
hsa-miR-218-1-3p	NM_020729	93.8278	ODF2L
hsa-miR-218-1-3p	NM_020834	84.1327	HOMEZ
hsa-miR-218-1-3p	NM_018156	63.4998	VPS13D
hsa-miR-218-1-3p	NM_018389	57.2748	SLC35C1
hsa-miR-218-1-3p	NM_001136264	51.7748	DAZAP2
hsa-miR-218-1-3p	NM_001257240	89.486	ALG13
hsa-miR-218-1-3p	NM_020802	54.6944	CEP126
hsa-miR-218-1-3p	NM_001754	59.5629	RUNX1
hsa-miR-218-1-3p	NM_182960	55.414	PRELID2
hsa-miR-218-1-3p	NM_001168360	51.3127	PCDH11X
hsa-miR-218-1-3p	NM_001204824	72.8996	KCNQ3
hsa-miR-218-1-3p	NM_001136127	52.43	DNM3
hsa-miR-218-1-3p	NM_001171162	72.2661	ZMYM3
hsa-miR-218-1-3p	NM_001317202	70.3125	CXXC5
hsa-miR-218-1-3p	NM_181654	57.945	CPLX4
hsa-miR-218-1-3p	NM_018890	81.6318	RAC1
hsa-miR-218-1-3p	NM_001301026	56.4023	TJP1
hsa-miR-218-1-3p	NM_001198608	58.5998	MAP7
hsa-miR-218-1-3p	NM_203454	62.7729	APOBEC4
hsa-miR-218-1-3p	NM_001177548	79.9668	SIGLEC6
hsa-miR-218-1-3p	NM_014048	91.2923	MRTFB
hsa-miR-218-1-3p	NM_001322832	81.9361	KCNMA1
hsa-miR-218-1-3p	NM_001170806	57.7715	ERICH5
hsa-miR-218-1-3p	NM_001007025	64.936	GOSR1
hsa-miR-218-1-3p	NM_004113	58.0255	FGF12
hsa-miR-218-1-3p	NM_205846	55.414	PRELID2
hsa-miR-218-1-3p	NM_001195555	83.1569	CLINT1
hsa-miR-218-1-3p	NM_001297620	58.2596	HNRNPR
hsa-miR-218-1-3p	NM_005908	88.0275	MANBA
hsa-miR-218-1-3p	NM_001324294	89.486	ALG13
hsa-miR-218-1-3p	NM_001303229	60.054	PRUNE1
hsa-miR-218-1-3p	NM_001243751	76.8108	CYREN
hsa-miR-218-1-3p	NM_198337	56.9513	INSIG1
hsa-miR-218-1-3p	NM_001098790	88.6008	MID1IP1
hsa-miR-218-1-3p	NM_198279	67.2187	BCLAF3
hsa-miR-218-1-3p	NM_001282150	51.5545	VPS29
hsa-miR-218-1-3p	NM_003404	52.5731	YWHAB
hsa-miR-218-1-3p	NM_001012968	62.1644	SPIN4
hsa-miR-218-1-3p	NM_001162422	60.9488	ETS1
hsa-miR-218-1-3p	NM_001178100	82.2448	CD8B
hsa-miR-218-1-3p	NM_001171689	70.888	AMMECR1
hsa-miR-218-1-3p	NM_001282613	70.902	BEST3
hsa-miR-218-1-3p	NM_001145340	53.9301	MDM2
hsa-miR-218-1-3p	NM_006078	69.3555	CACNG2
hsa-miR-218-1-3p	NM_173519	50.7685	CLVS1
hsa-miR-218-1-3p	NM_181481	65.8046	LDLRAD4
hsa-miR-218-1-3p	NM_001003675	65.8046	LDLRAD4
hsa-miR-218-1-3p	NM_001172813	55.8917	SLC30A8
hsa-miR-218-1-3p	NM_005816	74.572	CD96
hsa-miR-218-1-3p	NM_001293089	67.0014	CDC27
hsa-miR-218-1-3p	NM_020792	64.0051	NCEH1
hsa-miR-218-1-3p	NM_016452	55.3017	CAPN9
hsa-miR-218-1-3p	NM_001012642	86.0687	GRAMD2A
hsa-miR-218-1-3p	NM_001142597	74.7907	CLP1
hsa-miR-218-1-3p	NM_001322351	84.9283	LMAN2L
hsa-miR-218-1-3p	NM_001206488	88.7034	ATF3
hsa-miR-218-1-3p	NM_001321707	51.8917	NCOA2
hsa-miR-218-1-3p	NM_001321713	51.8917	NCOA2
hsa-miR-218-1-3p	NM_001204426	83.899	LIMK1
hsa-miR-218-1-3p	NM_006763	87.9419	BTG2
hsa-miR-218-1-3p	NM_020456	81.0564	SPRYD7
hsa-miR-218-1-3p	NM_001172811	55.8917	SLC30A8
hsa-miR-218-1-3p	NM_001390	56.9075	DTNA
hsa-miR-218-1-3p	NM_024943	54.4207	TMEM156
hsa-miR-218-1-3p	NM_022481	93.3692	ARAP3
hsa-miR-218-1-3p	NM_001145546	90.4446	GALP
hsa-miR-218-1-3p	NM_014455	67.7359	RNF115
hsa-miR-218-1-3p	NM_001193288	86.2665	SLC24A2
hsa-miR-218-1-3p	NM_001101387	79.2252	PIRT
hsa-miR-218-1-3p	NM_001077261	85.4731	NCOR2
hsa-miR-218-1-3p	NM_181523	57.5726	PIK3R1
hsa-miR-218-1-3p	NM_001172684	55.3854	CELF6
hsa-miR-218-1-3p	NM_005036	50	PPARA
hsa-miR-218-1-3p	NM_006939	55.1577	SOS2
hsa-miR-218-1-3p	NM_173549	57.7715	ERICH5
hsa-miR-218-1-3p	NM_001322366	85.4956	HK1
hsa-miR-218-1-3p	NM_001102396	56.9849	SIKE1
hsa-miR-218-1-3p	NM_001079514	70.0676	UBN1
hsa-miR-218-1-3p	NM_001288660	82.87	METTL9
hsa-miR-218-1-3p	NM_001322346	84.9283	LMAN2L
hsa-miR-218-1-3p	NM_001005746	69.4812	CACNB4
hsa-miR-218-1-3p	NM_001302272	54.126	PRDX3
hsa-miR-218-1-3p	NM_153263	74.4456	ZNF549
hsa-miR-218-1-3p	NM_001080825	57.4809	TMEM120B
hsa-miR-218-1-3p	NM_022369	54.6064	STRA6
hsa-miR-218-1-3p	NM_001287240	63.3516	ITM2C
hsa-miR-218-1-3p	NM_003794	57.1601	SNX4
hsa-miR-218-1-3p	NM_001008710	62.9625	RBPMS
hsa-miR-218-1-3p	NM_172101	81.1528	CD8B
hsa-miR-218-1-3p	NM_012124	62.5932	CHORDC1
hsa-miR-218-1-3p	NM_018482	52.2153	ASAP1
hsa-miR-218-1-3p	NM_001308047	62.4261	PRUNE2
hsa-miR-218-1-3p	NM_001276490	51.0835	SERPINB8
hsa-miR-218-1-3p	NM_004519	72.8996	KCNQ3
hsa-miR-218-1-3p	NM_001278478	54.8864	RUNX2
hsa-miR-218-1-3p	NM_001206654	85.4731	NCOR2
hsa-miR-218-1-3p	NM_018310	52.6267	BRF2
hsa-miR-218-1-3p	NM_006493	93.5113	CLN5
hsa-miR-218-1-3p	NM_001308038	55.1916	FER
hsa-miR-218-1-3p	NM_001001794	56.6517	DENND6B
hsa-miR-218-1-3p	NM_001202516	60.5979	CFLAR
hsa-miR-218-1-3p	NM_172213	82.3361	CD8B
hsa-miR-218-1-3p	NM_033407	81.422	DOCK7
hsa-miR-218-1-3p	NM_001324291	89.486	ALG13
hsa-miR-218-1-3p	NM_015250	69.6736	BICD2
hsa-miR-218-1-3p	NM_025083	57.1996	EDC3
hsa-miR-218-1-3p	NM_003439	83.663	ZKSCAN1
hsa-miR-218-1-3p	NM_032735	70.902	BEST3
hsa-miR-218-1-3p	NM_001128833	75.9027	ZBTB4
hsa-miR-218-1-3p	NM_002374	66.1563	MAP2
hsa-miR-218-1-3p	NM_138357	78.6206	MCU
hsa-miR-218-1-3p	NM_001136113	78.5866	POMT1
hsa-miR-218-1-3p	NM_001145337	53.9301	MDM2
hsa-miR-218-1-3p	NM_001322818	79.3269	UNC5D
hsa-miR-218-1-3p	NM_001318059	63.0818	DMAC1
hsa-miR-218-1-3p	NM_001261383	93.6297	UEVLD
hsa-miR-218-1-3p	NM_001320917	52.9319	CHRM5
hsa-miR-218-1-3p	NM_001007024	64.936	GOSR1
hsa-miR-218-1-3p	NM_001178138	65.3731	TFDP2
hsa-miR-218-1-3p	NM_019072	59.853	SGTB
hsa-miR-218-1-3p	NM_198846	80.2863	SIGLEC6
hsa-miR-218-1-3p	NM_000084	60.6242	CLCN5
hsa-miR-218-1-3p	NM_030759	80.8734	NRBF2
hsa-miR-218-1-3p	NM_001282546	56.9667	STK40
hsa-miR-218-1-3p	NM_001316943	80.7844	PARP16
hsa-miR-218-1-3p	NM_001463	56.9297	FRZB
hsa-miR-218-1-3p	NM_003474	62.3765	ADAM12
hsa-miR-218-1-3p	NM_001244808	83.5864	FOXP1
hsa-miR-218-1-3p	NM_001127183	60.5979	CFLAR
hsa-miR-218-1-3p	NM_001199847	57.6703	SMURF1
hsa-miR-218-1-3p	NM_015032	52.979	PDS5B
hsa-miR-218-1-3p	NM_181482	65.8046	LDLRAD4
hsa-miR-218-1-3p	NM_003879	60.5979	CFLAR
hsa-miR-218-1-3p	NM_001317205	70.3125	CXXC5
hsa-miR-218-1-3p	NM_001242828	73.7964	ELOVL5
hsa-miR-218-1-3p	NM_001257241	89.486	ALG13
hsa-miR-218-1-3p	NM_001128177	56.7054	THRB
hsa-miR-218-1-3p	NM_153757	61.0233	NAP1L5
hsa-miR-218-1-3p	NM_001322246	55.6165	ADGRL3
hsa-miR-218-1-3p	NM_019046	66.0021	ANKRD16
hsa-miR-218-1-3p	NM_001145266	57.2748	SLC35C1
hsa-miR-218-1-3p	NM_001322365	85.4956	HK1
hsa-miR-218-1-3p	NM_001145513	51.9478	SCRN1
hsa-miR-218-1-3p	NM_001160243	81.5221	RPAIN
hsa-miR-218-1-3p	NM_001244812	83.5864	FOXP1
hsa-miR-218-1-3p	NM_001103184	67.3721	FMN1
hsa-miR-218-1-3p	NM_001003800	81.8252	BICD2
hsa-miR-218-1-3p	NM_001305629	78.1878	CYREN
hsa-miR-218-1-3p	NM_001285439	79.3018	RICTOR
hsa-miR-218-1-3p	NM_153429	63.6225	CPNE4
hsa-miR-218-1-3p	NM_033309	71.1733	B3GNT9
hsa-miR-218-1-3p	NM_001320741	67.2038	FAM107B
hsa-miR-218-1-3p	NM_001788	64.2289	SEPTIN7
hsa-miR-218-1-3p	NM_001244572	86.3162	BID
hsa-miR-218-1-3p	NM_001316944	80.7844	PARP16
hsa-miR-218-1-3p	NM_001012980	74.2088	SATL1
hsa-miR-218-1-3p	NM_032051	57.0884	PATZ1
hsa-miR-218-1-3p	NM_134433	69.69	RFX2
hsa-miR-218-1-3p	NM_015236	57.9232	ADGRL3
hsa-miR-218-1-3p	NM_024594	88.204	PANK3
hsa-miR-218-1-3p	NM_021132	54.508	PPP3CB
hsa-miR-218-1-3p	NM_001143820	60.9488	ETS1
hsa-miR-218-1-3p	NM_032969	51.3127	PCDH11X
hsa-miR-218-1-3p	NM_001142444	57.1996	EDC3
hsa-miR-218-1-3p	NM_014868	62.9478	RNF10
hsa-miR-218-1-3p	NM_001322350	84.9283	LMAN2L
hsa-miR-218-1-3p	NM_001142353	63.5907	PPP3CB
hsa-miR-218-1-3p	NM_001170464	61.593	CDK17
hsa-miR-218-1-3p	NM_030805	84.9283	LMAN2L
hsa-miR-218-1-3p	NM_002033	57.7543	FUT4
hsa-miR-218-1-3p	NM_001244814	83.5864	FOXP1
hsa-miR-218-1-3p	NM_012334	80.033	MYO10
hsa-miR-218-1-3p	NM_020708	82.7265	SLC12A5
hsa-miR-218-1-3p	NM_015020	61.5959	PHLPP2
hsa-miR-218-1-3p	NM_001304474	54.3641	CHRD
hsa-miR-218-1-3p	NM_001025580	70.888	AMMECR1
hsa-miR-218-1-3p	NM_007226	51.4486	NXPH2
hsa-miR-218-1-3p	NM_001307976	52.0696	KANSL1L
hsa-miR-218-1-3p	NM_001164144	57.5727	CHAMP1
hsa-miR-218-1-3p	NM_001271783	63.7114	FAR2
hsa-miR-218-1-3p	NM_001127231	78.8194	AUTS2
hsa-miR-218-1-3p	NM_015651	63.7037	PHF19
hsa-miR-218-1-3p	NM_001286842	63.7037	PHF19
hsa-miR-218-1-3p	NM_175872	54.1196	ZNF792
hsa-miR-218-1-3p	NM_182911	89.6094	TSGA10
hsa-miR-218-1-3p	NM_002193	95.3033	INHBB
hsa-miR-218-1-3p	NM_000138	59.2064	FBN1
hsa-miR-218-1-3p	NM_001195556	83.1569	CLINT1
hsa-miR-218-1-3p	NM_001282736	60.5652	PLXDC2
hsa-miR-218-1-3p	NM_001288780	55.0907	MARCHF10
hsa-miR-218-1-3p	NM_001300734	51.8756	DDB2
hsa-miR-218-1-3p	NM_181524	57.5726	PIK3R1
hsa-miR-218-1-3p	NM_001144073	62.5932	CHORDC1
hsa-miR-218-1-3p	NM_145731	54.3499	SYNGR1
hsa-miR-218-1-3p	NM_001128214	85.9149	KCTD6
hsa-miR-218-1-3p	NM_000221	93.9744	KHK
hsa-miR-218-1-3p	NM_001322347	84.9283	LMAN2L
hsa-miR-218-1-3p	NM_001242466	57.5726	PIK3R1
hsa-miR-218-1-3p	NM_052834	64.1789	WDR7
hsa-miR-218-1-3p	NM_003144	51.3569	SSR1
hsa-miR-218-1-3p	NM_001198783	94.1752	POU2F1
hsa-miR-218-1-3p	NM_003745	58.9645	SOCS1
hsa-miR-218-1-3p	NM_001102397	58.2596	HNRNPR
hsa-miR-218-1-3p	NM_001324290	89.486	ALG13
hsa-miR-218-1-3p	NM_019073	87.0014	SPATA6
hsa-miR-218-1-3p	NM_001128176	56.7054	THRB
hsa-miR-218-1-3p	NM_001198940	56.9075	DTNA
hsa-miR-218-1-3p	NM_001011553	64.2289	SEPTIN7
hsa-miR-218-1-3p	NM_144703	93.0447	LSM14B
hsa-miR-218-1-3p	NM_198196	74.572	CD96
hsa-miR-218-1-3p	NM_001320722	69.4812	CACNB4
hsa-miR-218-1-3p	NM_001261382	55.7004	UEVLD
hsa-miR-218-1-3p	NM_001322830	81.9361	KCNMA1
hsa-miR-218-1-3p	NM_007050	52.6234	PTPRT
hsa-miR-218-1-3p	NM_030926	63.3516	ITM2C
hsa-miR-218-1-3p	NM_001308048	62.4261	PRUNE2
hsa-miR-218-1-3p	NM_152330	51.7715	FRMD6
hsa-miR-218-1-3p	NM_018200	73.3995	HMG20A
hsa-miR-218-1-3p	NM_033496	85.4956	HK1
hsa-miR-218-1-3p	NM_001270941	50	JAKMIP2
hsa-miR-218-1-3p	NM_001012455	61.1824	ZSCAN23
hsa-miR-218-1-3p	NM_001309192	55.5753	EPHB2
hsa-miR-218-1-3p	NM_001290207	79.1838	DCP1A
hsa-miR-218-1-3p	NM_001110503	73.2171	TMEM87A
hsa-miR-218-1-3p	NM_000401	61.5998	EXT2
hsa-miR-218-1-3p	NM_001172814	55.8917	SLC30A8
hsa-miR-218-1-3p	NM_198291	70.5923	SRC
hsa-miR-218-1-3p	NM_001256	67.0014	CDC27
hsa-miR-218-1-3p	NM_012234	50.3649	RYBP
hsa-miR-218-1-3p	NM_152841	78.9026	HPS4
hsa-miR-218-1-3p	NM_001287054	83.663	ZKSCAN1
hsa-miR-218-1-3p	NM_024874	64.591	KIAA0319L
hsa-miR-218-1-3p	NM_001178140	52.2888	TFDP2
hsa-miR-218-1-3p	NM_003257	56.4023	TJP1
hsa-miR-218-1-3p	NM_001244813	92.5624	FOXP1
hsa-miR-218-1-3p	NM_001145514	51.9478	SCRN1
hsa-miR-218-1-3p	NM_001270680	78.6206	MCU
hsa-miR-218-1-3p	NM_001145443	52.7559	PFKFB3
hsa-miR-218-1-3p	NM_001206486	88.0482	ATF3
hsa-miR-218-1-3p	NM_001289003	71.3108	PHLPP2
hsa-miR-218-1-3p	NM_001252634	56.7054	THRB
hsa-miR-218-1-3p	NM_020452	80.3927	NA
hsa-miR-218-1-3p	NM_001322364	85.4956	HK1
hsa-miR-218-1-3p	NM_001142618	54.6064	STRA6
hsa-miR-218-1-3p	NM_001168385	89.1462	ALG13
hsa-miR-218-1-3p	NM_001142617	54.6064	STRA6
hsa-miR-218-1-3p	NM_001015055	51.7127	RTKN
hsa-miR-218-1-3p	NM_001318946	74.9443	VPS26A
hsa-miR-218-1-3p	NM_001172412	51.0515	VANGL1
hsa-miR-218-1-3p	NM_005859	54.1479	PURA
hsa-miR-218-1-3p	NM_022844	89.8603	MYH11
hsa-miR-218-1-3p	NM_015036	58.9219	ENDOD1
hsa-miR-218-1-3p	NM_001282701	67.2038	FAM107B
hsa-miR-218-1-3p	NM_001317204	70.3125	CXXC5
hsa-miR-3140-3p	NM_018283	55.4963	NUDT15
hsa-miR-3140-3p	NM_015884	86.7938	MBTPS2
hsa-miR-3140-3p	NM_001011666	77.4371	CREB5
hsa-miR-3140-3p	NM_018905	66.1086	PCDHA2
hsa-miR-3140-3p	NM_001278205	63.6108	NA
hsa-miR-3140-3p	NM_006863	50	LILRA1
hsa-miR-3140-3p	NM_001166294	51.0219	SSX2IP
hsa-miR-3140-3p	NM_002126	64.4226	HLF
hsa-miR-3140-3p	NM_001324326	91.1138	PAK3
hsa-miR-3140-3p	NM_015189	56.0375	EXOC6B
hsa-miR-3140-3p	NM_001288823	62.1735	OLFM3
hsa-miR-3140-3p	NM_001207024	64.9718	M6PR
hsa-miR-3140-3p	NM_001199397	65.2514	NEK1
hsa-miR-3140-3p	NM_020132	71.3409	AGPAT3
hsa-miR-3140-3p	NM_005990	61.2593	STK10
hsa-miR-3140-3p	NM_016072	81.4656	GOLT1B
hsa-miR-3140-3p	NM_001004065	52.3234	PALM2AKAP2
hsa-miR-3140-3p	NM_001256165	80.5377	TMCO1
hsa-miR-3140-3p	NM_001281293	55.2344	ZNF281
hsa-miR-3140-3p	NM_006542	81.298	NA
hsa-miR-3140-3p	NM_001170704	61.7477	MBNL3
hsa-miR-3140-3p	NM_012175	53.4134	FBXO3
hsa-miR-3140-3p	NM_144991	68.6789	TSPEAR
hsa-miR-3140-3p	NM_001256629	51.3348	BRSK2
hsa-miR-3140-3p	NM_001008744	66.0521	TDP1
hsa-miR-3140-3p	NM_001145205	50	SHISA9
hsa-miR-3140-3p	NM_022051	79.6616	EGLN1
hsa-miR-3140-3p	NM_001280796	56.452	GLS2
hsa-miR-3140-3p	NM_001244583	77.7701	TFEC
hsa-miR-3140-3p	NM_182899	77.4371	CREB5
hsa-miR-3140-3p	NM_001317990	68.2808	ZBTB7A
hsa-miR-3140-3p	NM_001142640	55.7677	TNRC6C
hsa-miR-3140-3p	NM_139279	87.3537	MCFD2
hsa-miR-3140-3p	NM_033290	57.6247	MID1
hsa-miR-3140-3p	NM_003671	68.8775	CDC14B
hsa-miR-3140-3p	NM_003796	54.3301	URI1
hsa-miR-3140-3p	NM_001401	85.0942	LPAR1
hsa-miR-3140-3p	NM_001286795	52.4834	SPATA13
hsa-miR-3140-3p	NM_203283	91.1948	RBPJ
hsa-miR-3140-3p	NM_006646	56.3875	WASF3
hsa-miR-3140-3p	NM_001297599	51.135	MIER3
hsa-miR-3140-3p	NM_001195396	58.1639	ARL4A
hsa-miR-3140-3p	NM_015649	66.0144	IRF2BP1
hsa-miR-3140-3p	NM_001317818	72.2907	SLC10A7
hsa-miR-3140-3p	NM_001202517	74.0497	CFLAR
hsa-miR-3140-3p	NM_001193421	56.6956	TSHZ2
hsa-miR-3140-3p	NM_001100420	82.7557	C21orf91
hsa-miR-3140-3p	NM_005238	56.9239	ETS1
hsa-miR-3140-3p	NM_001083619	75.4067	GRIA2
hsa-miR-3140-3p	NM_001142386	94.2339	PDK3
hsa-miR-3140-3p	NM_001322233	90.0517	RPS6KA5
hsa-miR-3140-3p	NM_001165947	59.89	HTR2A
hsa-miR-3140-3p	NM_001280549	58.1387	PAX5
hsa-miR-3140-3p	NM_080632	66.6582	UPF3B
hsa-miR-3140-3p	NM_004326	50	BCL9
hsa-miR-3140-3p	NM_182666	50	UBE2E1
hsa-miR-3140-3p	NM_001008390	72.0361	CGGBP1
hsa-miR-3140-3p	NM_001135191	87.253	ASAP2
hsa-miR-3140-3p	NM_001007561	69.3279	IRGQ
hsa-miR-3140-3p	NM_001322893	66.8204	ABLIM1
hsa-miR-3140-3p	NM_033224	95.1369	PURB
hsa-miR-3140-3p	NM_000461	62.5024	THRB
hsa-miR-3140-3p	NM_015471	56.3006	NSL1
hsa-miR-3140-3p	NM_001271811	80.7181	MED21
hsa-miR-3140-3p	NM_001270407	55.2156	JAM2
hsa-miR-3140-3p	NM_017892	88.3917	PRPF40A
hsa-miR-3140-3p	NM_001278461	61.4879	COBLL1
hsa-miR-3140-3p	NM_001116	52.6239	ADCY9
hsa-miR-3140-3p	NM_018268	57.2676	WDR41
hsa-miR-3140-3p	NM_001272071	56.3615	AP1S2
hsa-miR-3140-3p	NM_001128929	74.9214	ROBO2
hsa-miR-3140-3p	NM_001008493	50.2098	ENAH
hsa-miR-3140-3p	NM_007249	93.1819	KLF12
hsa-miR-3140-3p	NM_001320810	91.7648	CTNNA2
hsa-miR-3140-3p	NM_032590	64.2197	KDM2B
hsa-miR-3140-3p	NM_001168320	89.4381	TSPAN9
hsa-miR-3140-3p	NM_001166417	51.0219	SSX2IP
hsa-miR-3140-3p	NM_001300928	83.2306	SNX3
hsa-miR-3140-3p	NM_001282903	69.3373	TRPS1
hsa-miR-3140-3p	NM_001029858	89.749	SLC35F1
hsa-miR-3140-3p	NM_001321475	80.8502	THUMPD2
hsa-miR-3140-3p	NM_020981	77.5893	B3GALT1
hsa-miR-3140-3p	NM_004482	85.3876	GALNT3
hsa-miR-3140-3p	NM_001168302	77.9489	KLHL13
hsa-miR-3140-3p	NM_001167	86.0314	XIAP
[truncated: 23,493 more rows]
